# Supplementary material for: Oxidative [3+2]-annulation of nitroalkenes and azolium ylides in the presence of Cu( ii ): efficient synthesis of [5,5]-annulated N-fused heterocycles
Source: Royal Society of Chemistry journal article supplement (doi:10.1039/d1nj05332a), 2022-01-01

## Supporting Information for

### **Oxidative [3+2]-annulation of nitroalkenes and azolium ylides in the presence of Cu(II): efficient synthesis of [5,5]-annulated *N*-fused heterocycles**

Vladimir Motornov,<sup>a</sup> Andrey A. Tabolin,<sup>a</sup> Sema L. Ioffe<sup>a</sup>

<sup>a</sup> N. D. Zelinsky Institute of Organic Chemistry, Russian Academy of Sciences, Leninsky prosp. 47, Moscow, 119991, Russia.

## General experimental.

All reactions were performed in oven-dried (150 °C) glassware. Most of the chemicals were acquired from commercial sources and used as received. Starting nitroalkenes were prepared by literature procedures: **1a**,<sup>s1</sup> **1b**,<sup>s2</sup> **1c-1d**,<sup>s1</sup> **1e-1f**,<sup>s3</sup> **1g**,<sup>s4</sup> **1h-1i**,<sup>s5</sup> **1j**,<sup>s6</sup> **1k**,<sup>s4</sup> **1l**.<sup>s7</sup> Other starting materials were prepared according to the literature procedures: **2a**,<sup>s3</sup> **2f**.<sup>s4</sup> TLC were performed on silica coated on aluminium with UV254 indicator. Visualization was accomplished with UV. Column chromatography was performed on silica (0.04–0.063 mm, 60 Å). NMR spectra were recorded at the 300 MHz (<sup>1</sup>H NMR), 75 MHz (<sup>13</sup>C NMR), and 282 MHz (<sup>19</sup>F NMR) frequencies. Multiplicities are assigned as s (singlet), d (doublet), t (triplet), q (quadruplet), m (multiplet), br (broad). High resolution mass spectra were acquired at TOF spectrometer using electrospray ionization (ESI). Positions of pyrrolo[2,1-b]thiazole and pyrrolo[1,2-b]indazole rings are numerated according to IUPAC as shown. Assignment was made on the basis of 2D NMR (COSY, HSQC, HMBC) for compounds **3c**, **5a**, **5b**, **5e**, **5f**, **7f**.

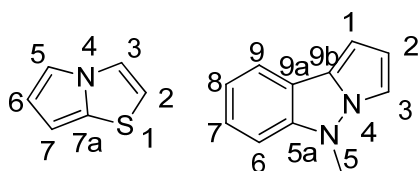

For the salts **2** and **6** intensities of CH<sub>2</sub>-group signals can be reduced due to their high acidity that causes proton exchange with water in DMSO-d<sub>6</sub>. More significant decrease of CH<sub>2</sub>-group intensity is attributed to higher acidity (e.g. for compound **2c**).

### List of starting reagents:

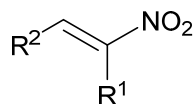

**1a**, R<sup>1</sup> = F, R<sup>2</sup> = 4-Cl-C<sub>6</sub>H<sub>4</sub>-

**1b**, R<sup>1</sup> = F, R<sup>2</sup> = 2-Cl-C<sub>6</sub>H<sub>4</sub>-

**1c**, R<sup>1</sup> = F, R<sup>2</sup> = 4-MeO-C<sub>6</sub>H<sub>4</sub>-

**1d**, R<sup>1</sup> = F, R<sup>2</sup> = 4-NO<sub>2</sub>-C<sub>6</sub>H<sub>4</sub>-

**1e**, R<sup>1</sup> = CO<sub>2</sub>Et, R<sup>2</sup> = 4-Cl-C<sub>6</sub>H<sub>4</sub>-

**1f**, R<sup>1</sup> = CO<sub>2</sub>Et, R<sup>2</sup> = 2-Br-C<sub>6</sub>H<sub>4</sub>-

**1g**, R<sup>1</sup> = H, R<sup>2</sup> = 4-Cl-C<sub>6</sub>H<sub>4</sub>-

**1h**, R<sup>1</sup> = H, R<sup>2</sup> = Ph

**1i**, R<sup>1</sup> = H, R<sup>2</sup> = 4-MeO-C<sub>6</sub>H<sub>4</sub>-

**1j**, R<sup>1</sup> = H, R<sup>2</sup> = 2-Br-C<sub>6</sub>H<sub>4</sub>-

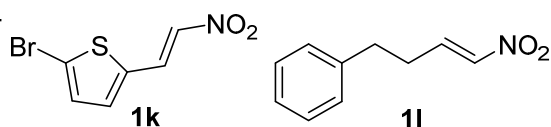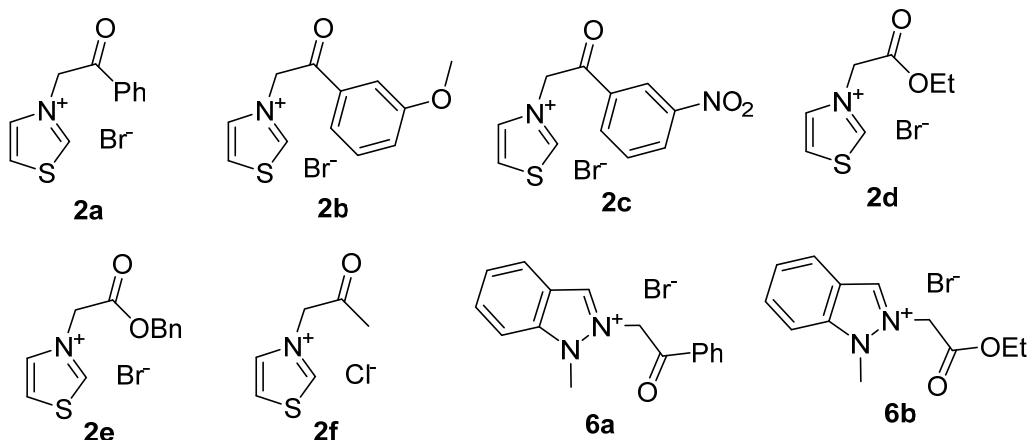

### Synthesis of thiazolium salts **2a-2c**:

To the solution of thiazole (255 mg, 3 mmol) in EtOAc (3 ml) corresponding bromoacetophenone (3 mmol) was added and the mixture was stirred at r.t. for 3 days. Precipitated product **2** was filtered, washed with EtOAc and dried under air.

#### **3-(2-Oxo-2-phenylethyl)-1,3-thiazol-3-ium bromide 2a**

White solid, yield 0.79 g (93%). mp = 232-235°C (dec.) (EtOAc) (lit. 223-223.5°C (dec.))<sup>s8</sup>  
NMR matches previously reported data.<sup>s9</sup>

#### **3-[2-(3-Methoxyphenyl)-2-oxoethyl]-1,3-thiazol-3-ium bromide 2b**

White amorphous solid, yield 0.84 g (89%).

<sup>1</sup>H NMR (300 MHz, DMSO-d<sub>6</sub>): δ 3.83 (s, 3H, OMe), 6.45 (s, 2H, CH<sub>2</sub>), 7.30-7.37 (m, 1H, CH<sub>Ar</sub>), 7.48-7.66 (m, 3H, CH<sub>Ar</sub>), 8.39 (s, *J* = 2.1 Hz, 1H, CH(thiazole)), 8.51 (d, *J* = 2.1 Hz, 1H, CH(thiazole)), 10.22 (s, 1H, H2(thiazole)).

<sup>13</sup>C NMR (75 MHz, DMSO-d<sub>6</sub>, DEPT-135): δ 56.1 (OMe), 61.1 (CH<sub>2</sub>), 113.3 (CH<sub>Ar</sub>), 121.0 (CH<sub>Ar</sub>), 121.1 (CH<sub>Ar</sub>), 126.5 (CH(thiazole)), 130.9 (CH<sub>Ar</sub>), 135.2 (C<sub>Ar</sub>), 138.8 (CH(thiazole)), 160.0 (C<sub>Ar</sub>-OMe), 161.9 (CH(thiazole)), 191.0 (C=O).

HRMS (ESI): *m/z* calcd. for [C<sub>12</sub>H<sub>12</sub>BrNO<sub>2</sub>S - Br]<sup>+</sup>: 234.0583, found: 234.0586.

### 3-[2-(3-Nitrophenyl)-2-oxoethyl]-1,3-thiazol-3-ium bromide 2c

White solid, yield 0.90 g (91%). mp = 234-236°C (dec.) (EtOAc)

<sup>1</sup>H NMR (300 MHz, DMSO-d<sub>6</sub>): δ 6.48 (s, 2H, CH<sub>2</sub>, proton exchange with water), 7.96 (app t, *J* = 8.1 Hz, 1H, CH<sub>Ar</sub>), 8.40 (dd, *J* = 3.6, 2.5 Hz, 1H, CH<sub>Ar</sub>), 8.44 (br s, 1H, CH(thiazole)), 8.46-8.50 (m, 2H, CH), 8.59 (dd, *J* = 8.1, 1.7 Hz, 1H, CH<sub>Ar</sub>), 8.72 (app t, *J* = 1.7 Hz, 1H, CH<sub>Ar</sub>), 10.18 (s, 1H, H2(thiazole)).

<sup>13</sup>C NMR (75 MHz, DMSO-d<sub>6</sub>, DEPT-135): δ 123.0 (CH<sub>Ar</sub>), 126.6 (CH(thiazole)), 129.1 (CH<sub>Ar</sub>), 131.5 (CH<sub>Ar</sub>), 134.8 (CH<sub>Ar</sub>), 135.3 (C<sub>Ar</sub>), 138.7 (CH(thiazole)), 148.5 (C<sub>Ar</sub>-NO<sub>2</sub>), 162.1 (CH(thiazole)), 190.0 (C=O).

HRMS (ESI): *m/z* calcd. for [C<sub>11</sub>H<sub>9</sub>BrN<sub>2</sub>O<sub>3</sub>S-Br]<sup>+</sup>: 249.0328, found: 249.0339

### 3-(2-Ethoxy-2-oxoethyl)-1,3-thiazol-3-ium bromide 2d

Solution of thiazole (425 mg, 5 mmol) and ethyl bromoacetate (835 mg, 5 mmol) in toluene (5 ml) was heated at 100°C for 36 hours, then cooled to r. t. Mother liquor was removed and the precipitated slightly yellow oil was triturated with PhMe and dried in vacuo to give 1.04 g (82%) of **2d** as a slightly yellow semisolid.

<sup>1</sup>H NMR (300 MHz, DMSO-d<sub>6</sub>): δ 1.21 (t, *J* = 7.1 Hz, 3H, CH<sub>3</sub>), 4.19 (q, *J* = 7.1 Hz, 2H, OCH<sub>2</sub>CH<sub>3</sub>), 5.68 (s, 2H, N<sup>+</sup>-CH<sub>2</sub>), 8.39 (m, 1H, CH(thiazole)), 8.58 (d, *J* = 3.4 Hz, 1H, CH(thiazole)), 10.32 (s, 1H, H2(thiazole)).

<sup>13</sup>C NMR (75 MHz, DMSO-d<sub>6</sub>, DEPT-135): δ 14.4 (CH<sub>3</sub>), 55.0 (N-CH<sub>2</sub>), 62.3 (OCH<sub>2</sub>CH<sub>3</sub>), 126.8 (CH), 138.5 (CH), 162.1 (CH), 166.6 (CO<sub>2</sub>Et).

HRMS (ESI): *m/z* calcd. for [C<sub>7</sub>H<sub>10</sub>BrNO<sub>2</sub>S-Br]<sup>+</sup>: 172.0427, found: 172.0424

### 3-[2-(Benzyloxy)-2-oxoethyl]-1,3-thiazol-3-ium bromide 2e

Solution of thiazole (255 mg, 3 mmol) and benzyl bromoacetate (687 mg, 3 mmol) in EtOAc (3 ml) was refluxed for 24 hours, then cooled to r. t. Precipitated solid was filtered and dried under air to give 735 mg (78%) of **2e** as a white solid.

mp = 109-112°C (EtOAc)

<sup>1</sup>H NMR (300 MHz, DMSO-d<sub>6</sub>): δ 5.23 (s, 2H, O-CH<sub>2</sub>), 5.74 (s, 2H, N<sup>+</sup>-CH<sub>2</sub>), 7.30-7.42 (m, 5H, CH<sub>Ph</sub>), 8.38 (s, *J* = 2.4 Hz, 1H, CH(thiazole)), 8.58 (d, *J* = 2.4 Hz, 1H, CH(thiazole)), 10.31 (s, 1H, H2(thiazole)).

<sup>13</sup>C NMR (75 MHz, DMSO-d<sub>6</sub>, DEPT-135): δ 55.0 (N-CH<sub>2</sub>), 67.9 (OCH<sub>2</sub>Ph), 126.8 (CH(thiazole)), 128.7 128.9 (CH<sub>Ph</sub>), 129.0 (CH<sub>Ph</sub>), 135.4 (C<sub>Ph</sub>), 138.6 (CH(thiazole)), 162.3 (CH(thiazole)), 166.6 (CO<sub>2</sub>Et).

HRMS (ESI): *m/z* calcd. for [C<sub>12</sub>H<sub>12</sub>BrNO<sub>2</sub>S-Br]<sup>+</sup>: 234.0583, found: 234.0577

### **3-(2-Oxopropyl)-1,3-thiazol-3-ium chloride 2f**

Solution of thiazole (255 mg, 3 mmol) and chloroacetone (278 mg, 3 mmol) in toluene (3 ml) was heated at 100°C for 24 hours, then maintained at r. t. for 8 hours. Precipitated material was filtered, washed with PhMe and dried under air to give 325 mg (61%) of **2f** as a brown solid.

mp = 132-133°C (dec.) (PhMe)

<sup>1</sup>H NMR (300 MHz, DMSO-d<sub>6</sub>): δ 2.26 (s, 3H, Me), 5.80 (s, 2H, CH<sub>2</sub>, proton exchange with water), 8.35 (br s, 1H, CH(thiazole)), 8.43 (br s, 1H, CH(thiazole)), 10.18 (s, 1H, H2(thiazole)).

<sup>13</sup>C NMR (75 MHz, DMSO-d<sub>6</sub>, DEPT-135): δ 27.5 (CH<sub>3</sub>), 62.9 (N<sup>+</sup>-CH<sub>2</sub>), 126.4 (CH), 138.5 (CH), 161.5 (CH), 199.9 (C=O).

HRMS (ESI): *m/z* calcd. for [C<sub>6</sub>H<sub>8</sub>CINOS-Cl]<sup>+</sup>: 142.0321, found: 142.0331

### Synthesis of indazolium salts **6a-6b**:

#### **1-Methyl-2-(2-oxo-2-phenylethyl)-1H-indazol-2-ium bromide 6a**

A solution of 1-methyl-1H-indazole (264 mg, 2 mmol) and 2-bromoacetophenone (398 mg, 2 mmol) in toluene (2 ml) was heated at 100°C for 2 days. The mixture was cooled down and the precipitated white solid **6a** (549 mg, 83%) was filtered, washed with toluene and dried under air.

mp = 189-192°C (EtOAc)

<sup>1</sup>H NMR (300 MHz, DMSO-d<sub>6</sub>): δ 4.27 (s, 3H, Me), 6.94 (s, 2H, CH<sub>2</sub>, proton exchange with water), 7.57 (app t, *J* = 6.9 Hz, 1H, CH<sub>Ar</sub>), 7.63-7.74 (m, 2H, CH<sub>Ar</sub>), 7.82 (app t, *J* = 6.9 Hz, 1H, CH<sub>Ar</sub>), 7.90-7.97 (m, 1H, CH<sub>Ar</sub>), 8.05-8.23 (m, 4H, CH<sub>Ar</sub>), 9.35 (s, 1H, H3(indazole)).

<sup>13</sup>C NMR (75 MHz, DMSO-d<sub>6</sub>, DEPT-135): δ 34.1 (N-Me), 58.1 (CH<sub>2</sub>), 111.9 (CH), 119.4 (C<sub>q</sub>), 123.7 (CH), 125.7 (CH), 129.1 (CH), 129.6 (CH), 133.8 (C<sub>q</sub>), 133.9 (CH), 134.8 (CH), 135.4 (CH), 140.8 (C<sub>q</sub>), 191.1 (C=O).

HRMS (ESI): *m/z* calcd. for [C<sub>16</sub>H<sub>15</sub>N<sub>2</sub>O]<sup>+</sup>: 251.1179, found: 251.1183

#### **2-(2-Ethoxy-2-oxoethyl)-1-methyl-1H-indazol-2-ium bromide 6b**

A solution of 1-methyl-1H-indazole (264 mg, 2 mmol) and ethyl bromoacetate (0.28 ml, 418 mg, 2.5 mmol) in toluene (2 ml) was heated at 100°C for 4 days. The mixture was cooled down and the precipitated white solid **6b** (281 mg, 47%) was filtered, washed with toluene and dried under air.

mp = 154-156°C (PhMe)

<sup>1</sup>H NMR (300 MHz, DMSO-d<sub>6</sub>): δ 1.27 (s, 3H, -CH<sub>2</sub>-CH<sub>3</sub>), 4.29 (br s, 5H, N-Me + OCH<sub>2</sub>-), 6.04 (s, 2H, N<sup>+</sup>-CH<sub>2</sub>), 7.56 (br s, 1H, CH<sub>Ar</sub>), 7.89-7.97 (m, 1H, CH<sub>Ar</sub>), 8.00-8.08 (m, 1H, CH<sub>Ar</sub>), 8.18 (d, *J* = 7.7 Hz, 1H, CH<sub>Ar</sub>), 9.36 (s, 1H, H3(indazole)).

$^{13}\text{C}$  NMR (75 MHz, DMSO- $d_6$ , DEPT-135):  $\delta$  14.4 (-CH<sub>2</sub>-CH<sub>3</sub>), 34.1 (N-Me), 51.9 (N<sup>+</sup>-CH<sub>2</sub>-), 63.1 (CH<sub>2</sub>CH<sub>3</sub>), 111.9 (CH), 119.3 (C<sub>q</sub>), 123.8 (CH), 125.9 (CH), 134.3 (CH), 135.0 (CH), 140.9 (C<sub>q</sub>), 165.9 (CO<sub>2</sub>Et).

HRMS (ESI):  $m/z$  calcd. for [C<sub>12</sub>H<sub>15</sub>N<sub>2</sub>O<sub>2</sub>]<sup>+</sup>: 219.1128, found: 219.1125

General procedure 1 for the synthesis of 7-fluoropyrrolo[2,1-b]thiazoles 3.

To the solution of thiazolium salt **2** (0.5 mmol, 2.5 equiv.) in dry DMSO (1 ml) powdered 4Å molecular sieves (100 mg) and 2,6-lutidine (107 mg, 1 mmol, 5 equiv.) were added, followed by addition of nitroalkene **1** (0.2 mmol, 1.0 equiv.) and Cu(OCOCF<sub>3</sub>)<sub>2</sub>·H<sub>2</sub>O (123 mg, 0.4 mmol, 2.0 equiv.) The mixture was stirred at r. t. for 1 h – 3 d. After the reaction was complete (TLC monitoring), it was quenched with EtOAc/1% aqueous Na<sub>2</sub>EDTA solution (30/30 ml). Aqueous layer was extracted with 3\*30 ml EtOAc. Combined organic layer was dried over anhydrous Na<sub>2</sub>SO<sub>4</sub> and evaporated after addition of silica gel. Crude product was purified by column chromatography using PE/EtOAc as an eluent to give pyrrolo[2,1-b]thiazoles **3**.

**[6-(4-Chlorophenyl)-7-fluoropyrrolo[2,1-b][1,3]thiazol-5-yl](phenyl)methanone 3a**

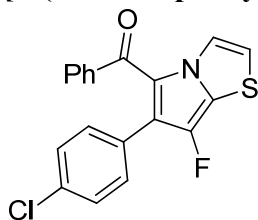

Pyrrolo[2,1-b]thiazole **3a** was obtained from  $\alpha$ -fluoronitroalkene **1a** (40.3 mg, 0.2 mmol) and thiazolium salt **2a** (2.5 equiv.) following the general procedure 1 (reaction time 5 h). Column chromatography (eluent: 15:1 PE/EtOAc) afforded **3a** (44 mg, 62%) as a yellow solid.

R<sub>f</sub> = 0.36 (PE/EtOAc, 3:1) (UV) mp = 128-129°C (CHCl<sub>3</sub>)

$^1\text{H}$  NMR (300 MHz, CDCl<sub>3</sub>):  $\delta$  6.94 (d,  $J$  = 4.2 Hz, 1H, H<sub>2</sub>), 6.97-7.03 (m, 4H, CH<sub>Ar</sub>), 7.06 (d,  $J$  = 7.8 Hz, 2H, CH<sub>Ar</sub>), 7.24 (m, 1H, CH<sub>Ar</sub>), 7.33 – 7.39 (m, 2H, CH<sub>Ar</sub>), 8.78 (dd,  $J$  = 4.2, 1.9 Hz, 1H, H<sub>3</sub>).

$^{13}\text{C}$  NMR (75 MHz, CDCl<sub>3</sub>):  $\delta$  113.1 (C<sub>2</sub>-H), 117.2 (C<sub>5</sub>), 122.8 (d,  $^2J_{CF}$  = 9.1 Hz, C<sub>6</sub>), 123.9 (C<sub>3</sub>-H), 124.1 (d,  $^2J_{CF}$  = 27.0 Hz, C<sub>7a</sub>), 127.5 (CH<sub>Ar</sub>), 127.9 (CH<sub>Ar</sub>), 129.1 (CH<sub>Ar</sub>), 129.3 (d,  $^3J_{CF}$  = 2.5 Hz, C<sub>Ar</sub>), 131.0 (CH<sub>Ar</sub>), 131.7 (d,  $^4J_{CF}$  = 1.0 Hz, CH<sub>Ar</sub>), 133.2 (C<sub>Ar</sub>-Cl), 138.4 (C<sub>Ar</sub>), 141.2 (d,  $^1J_{CF}$  = 242.5 Hz, C<sub>7</sub>-F), 184.9 (d,  $^4J_{CF}$  = 2.8 Hz, C=O).

$^{19}\text{F}$  NMR (282 MHz, CDCl<sub>3</sub>):  $\delta$  -170.7 (d,  $J$  = 1.9 Hz).

HRMS (ESI):  $m/z$  calcd. for [C<sub>19</sub>H<sub>11</sub>ClFNOS + H<sup>+</sup>]: 356.0307, found: 356.0302

### [6-(2-Chlorophenyl)-7-fluoropyrrolo[2,1-b][1,3]thiazol-5-yl](phenyl)methanone **3b**

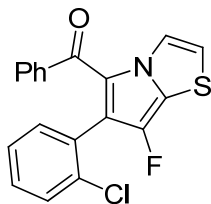

Pyrrolo[2,1-b]thiazole **3b** was obtained from  $\alpha$ -fluoronitroalkene **1b** (60.3 mg, 0.25 mmol) and thiazolium salt **2a** (2.5 equiv.) following the general procedure 1 (reaction time 8 h). Column chromatography (eluent: 7:1 PE/EtOAc) afforded **3b** (76 mg, 71%) as a yellow solid.

$R_f$  = 0.37 (PE/EtOAc, 3:1) (UV), mp = 167-168°C (CHCl<sub>3</sub>)

<sup>1</sup>H NMR (300 MHz, CDCl<sub>3</sub>):  $\delta$  6.83-6.94 (m, 2H, CH<sub>Ar</sub>), 6.96 (d,  $J$  = 4.1 Hz, 1H, H2), 6.98-7.05 (m, 3H, CH<sub>Ar</sub>), 7.11-7.17 (m, 1H, CH<sub>Ar</sub>), 7.21 (dd,  $J$  = 8.0, 0.7 Hz, 1H, CH<sub>Ar</sub>), 7.36-7.43 (m, 2H, CH<sub>Ar</sub>), 8.81 (dd,  $J$  = 4.1, 1.8 Hz, 1H, H3).

<sup>13</sup>C NMR (75 MHz, CDCl<sub>3</sub>):  $\delta$  113.3 (C2-H), 117.6 (C5), 120.8 (d,  $^2J_{CF}$  = 10.5 Hz, C6), 123.9 (d,  $^2J_{CF}$  = 28.2 Hz, C7a), 124.0 (C3-H), 126.0 (CH<sub>Ar</sub>), 127.2 (CH<sub>Ar</sub>), 128.6 (CH<sub>Ar</sub>), 129.0 (CH<sub>Ar</sub>), 129.1 (CH<sub>Ar</sub>), 130.4 (d,  $^3J_{CF}$  = 2.5 Hz, C<sub>Ar</sub>), 130.7 (CH<sub>Ar</sub>), 133.2 (CH<sub>Ar</sub>), 134.2 (C<sub>Ar</sub>-Cl), 138.6 (C<sub>Ar</sub>), 141.5 (d,  $^1J_{CF}$  = 243.2 Hz, C7-F), 185.0 (d,  $^4J_{CF}$  = 2.8 Hz, C=O).

<sup>19</sup>F NMR (282 MHz, CDCl<sub>3</sub>):  $\delta$  -166.1 (d,  $J$  = 1.8 Hz).

HRMS (ESI):  $m/z$  calcd. for [C<sub>19</sub>H<sub>11</sub>ClFNOS + H<sup>+</sup>]: 356.0307, found: 356.0304.

### [7-Fluoro-6-(4-methoxyphenyl)pyrrolo[2,1-b][1,3]thiazol-5-yl](phenyl)methanone **3c**

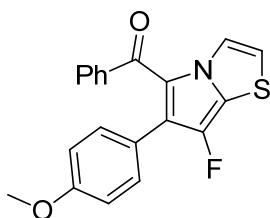

Pyrrolo[2,1-b]thiazole **3c** was obtained from  $\alpha$ -fluoronitroalkene **1c** (39.4 mg, 0.2 mmol) and thiazolium salt **2a** (2.5 equiv.) following the general procedure 1 (reaction time 2 days). Column chromatography (eluent: 7:1 to 3:1 PE/EtOAc) afforded **3c** (47.5 mg, 53%) as a yellow solid.

$R_f$  = 0.34 (PE/EtOAc, 3:1) (UV), mp = 126-129°C (CHCl<sub>3</sub>)

<sup>1</sup>H NMR (300 MHz, CDCl<sub>3</sub>, COSY):  $\delta$  3.71 (s, 3H, OMe), 6.55-6.61 (m, 2H, CH<sub>Ar</sub>), 6.90 (d,  $J$  = 4.1 Hz, 1H, H2), 6.93-7.07 (m, 4H, CH<sub>Ar</sub>), 7.16-7.22 (m, 1H, CH<sub>Ar</sub>), 7.36-7.42 (m, 2H, CH<sub>Ar</sub>), 8.77 (dd,  $J$  = 4.1, 1.9 Hz, 1H, H3).

<sup>13</sup>C NMR (75 MHz, CDCl<sub>3</sub>, DEPT-135, HSQC, HMBC):  $\delta$  55.2 (OMe), 112.5 (C2-H), 113.3 (CH<sub>Ar</sub>), 117.3 (C5), 123.1 (d,  $^3J_{CF}$  = 2.5 Hz, C<sub>Ar</sub>), 124.0 (C3-H), 124.0 (d,  $^2J_{CF}$  = 9.1 Hz, C6), 124.1 (d,  $^2J_{CF}$  = 28.3 Hz, C7a), 127.4 (CH<sub>Ar</sub>), 129.2 (CH<sub>Ar</sub>), 130.7 (CH<sub>Ar</sub>), 131.7 (d,  $^4J_{CF}$  = 0.9 Hz, CH<sub>Ar</sub>), 138.6 (C<sub>Ar</sub>), 141.4 (d,  $^1J_{CF}$  = 241.0 Hz, C7-F), 158.7 (C<sub>Ar</sub>-OMe), 185.1 (d,  $^4J_{CF}$  = 2.8 Hz, C=O).

$^{19}\text{F}$  NMR (282 MHz,  $\text{CDCl}_3$ ):  $\delta$  -171.1 (s).

HRMS (ESI):  $m/z$  calcd. for  $[\text{C}_{20}\text{H}_{14}\text{FNO}_2\text{S} + \text{H}^+]$ : 352.0802, found: 352.0803.

### [7-Fluoro-6-(4-nitrophenyl)pyrrolo[2,1-*b*][1,3]thiazol-5-yl](phenyl)methanone **3d**

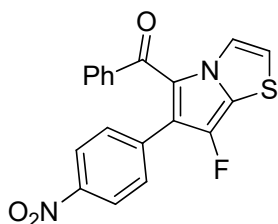

Pyrrolo[2,1-*b*]thiazole **3d** was obtained from  $\alpha$ -fluoronitroalkene **1d** (42.4 mg, 0.2 mmol) and thiazolium salt **2a** (2.5 equiv.) following the general procedure 1 (reaction time 3 h). Column chromatography (eluent: 5:1 PE/EtOAc) afforded **3d** (26 mg, 34%) as a bright yellow solid.

$R_f$  = 0.30 (PE/EtOAc, 3:1) (UV), mp = 163-164°C ( $\text{CHCl}_3$ )

$^1\text{H}$  NMR (300 MHz,  $\text{CDCl}_3$ , COSY):  $\delta$  7.01 (d,  $J$  = 4.2 Hz, 1H, H2), 7.04 (d,  $J$  = 7.8 Hz, 2H,  $\text{CH}_{\text{Ar}}$ ), 7.17-7.24 (m, 3H,  $\text{CH}_{\text{Ar}}$ ), 7.33-7.39 (m, 2H,  $\text{CH}_{\text{Ar}}$ ), 7.91 (d,  $J$  = 8.8 Hz, 2H,  $\text{CH}_{\text{Ar}}$ ), 8.79 (dd,  $J$  = 4.2, 1.9 Hz, 1H, H3).

$^{13}\text{C}$  NMR (75 MHz,  $\text{CDCl}_3$ ):  $\delta$  114.1 (C2-H), 117.1 (C5), 121.3 (d,  $^2J_{\text{CF}}$  = 8.7 Hz, C6), 122.7 ( $\text{CH}_{\text{Ar}}$ ), 123.8 (C3-H), 124.2 (d,  $^2J_{\text{CF}}$  = 28.0 Hz, C7a), 127.7 ( $\text{CH}_{\text{Ar}}$ ), 129.1 ( $\text{CH}_{\text{Ar}}$ ), 131.2 (d,  $^4J_{\text{CF}}$  = 1.0 Hz,  $\text{CH}_{\text{Ar}}$ ), 131.4 ( $\text{CH}_{\text{Ar}}$ ), 137.8 (d,  $^3J_{\text{CF}}$  = 2.6 Hz,  $\text{C}_{\text{Ar}}$ ), 138.3 ( $\text{C}_{\text{Ar}}$ ), 141.2 (d,  $^1J_{\text{CF}}$  = 244.5 Hz, C7-F), 146.4 ( $\text{C}_{\text{Ar}}\text{-NO}_2$ ), 184.7 (d,  $^4J_{\text{CF}}$  = 2.7 Hz, C=O).

$^{19}\text{F}$  NMR (282 MHz,  $\text{CDCl}_3$ ):  $\delta$  -170.1 (m).

HRMS (ESI):  $m/z$  calcd. for  $[\text{C}_{19}\text{H}_{11}\text{FN}_2\text{O}_3\text{S} + \text{H}^+]$ : 367.0547, found: 367.0550.

### [6-(4-Chlorophenyl)-7-fluoropyrrolo[2,1-*b*][1,3]thiazol-5-yl](3-methoxyphenyl)methanone **3e**

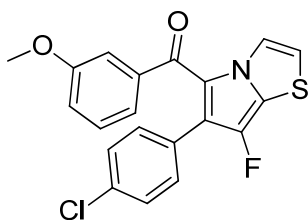

Pyrrolo[2,1-*b*]thiazole **3e** was obtained from  $\alpha$ -fluoronitroalkene **1a** (40.3 mg, 0.2 mmol) and thiazolium salt **2b** (2.5 equiv.) following the general procedure 1 (reaction time 3 h). Column chromatography (eluent: 5:1 PE/EtOAc) afforded **3e** (50 mg, 65%) as an amorphous yellow solid.

$R_f$  = 0.31 (PE/EtOAc, 3:1) (UV)

$^1\text{H}$  NMR (300 MHz,  $\text{CDCl}_3$ ):  $\delta$  3.65 (s, 3H, OMe), 6.79 (m, 1H,  $\text{CH}_{\text{Ar}}$ ), 6.88 (br s, 1H,  $\text{CH}_{\text{Ar}}$ ), 6.94 (d,  $J$  = 4.1 Hz, 1H, H2), 6.96-7.07 (m, 6H,  $\text{CH}_{\text{Ar}}$ ), 8.77 (dd,  $J$  = 4.1, 1.8 Hz, 1H, H3).



$^{13}\text{C}$  NMR (75 MHz,  $\text{CDCl}_3$ ):  $\delta$  55.2 (OMe), 113.2 ( $\text{CH}_{\text{Ar}}$ ), 114.1 (C2-H), 117.2 (C5, overlapped signal), 117.2 ( $\text{CH}_{\text{Ar}}$ ), 121.8 ( $\text{CH}_{\text{Ar}}$ ), 122.7 (d,  $^2J_{\text{CF}} = 9.0$  Hz, C6), 124.0 (C3-H), 124.2 (d,  $^2J_{\text{CF}} = 28.4$  Hz, C7a), 127.8 ( $\text{CH}_{\text{Ar}}$ ), 128.7 ( $\text{CH}_{\text{Ar}}$ ), 129.4 (d,  $^3J_{\text{CF}} = 2.5$  Hz,  $\text{C}_{\text{Ar}}$ ), 131.5 (d,  $^4J_{\text{CF}} = 0.9$  Hz,  $\text{CH}_{\text{Ar}}$ ), 133.2 ( $\text{C}_{\text{Ar}}\text{-Cl}$ ), 139.7 ( $\text{C}_{\text{Ar}}$ ), 141.2 (d,  $^1J_{\text{CF}} = 242.5$  Hz, C7-F), 158.9 ( $\text{C}_{\text{Ar}}\text{-OMe}$ ), 184.6 (d,  $^4J_{\text{CF}} = 2.8$  Hz,  $\text{C}=\text{O}$ ).

$^{19}\text{F}$  NMR (282 MHz,  $\text{CDCl}_3$ ):  $\delta$  -170.6 (s).

HRMS (ESI):  $m/z$  calcd. for  $[\text{C}_{20}\text{H}_{13}\text{ClFNO}_2\text{S} + \text{H}^+]$ : 386.0412, found: 386.0411.

### [6-(4-Chlorophenyl)-7-fluoropyrrolo[2,1-*b*][1,3]thiazol-5-yl](3-nitrophenyl)methanone **3f**

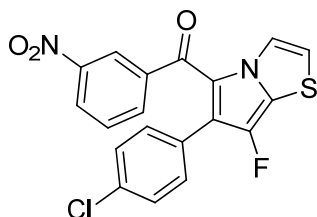

Pyrrolo[2,1-*b*]thiazole **3f** was obtained from  $\alpha$ -fluoronitroalkene **1a** (50.4 mg, 0.25 mmol) and thiazolium salt **2c** (2.5 equiv.) following the general procedure 1 (reaction time 1 h). Column chromatography (eluent: 5:1 PE/EtOAc) afforded **3f** (41 mg, 41%) as a bright yellow solid.

$R_f = 0.20$  (PE/EtOAc, 3:1) (UV) mp = 213-215°C ( $\text{CHCl}_3$ )

$^1\text{H}$  NMR (300 MHz,  $\text{CDCl}_3$ ):  $\delta$  6.94-7.02 (m, 4H,  $\text{CH}_{\text{Ar}}$ ), 7.04 (d,  $J = 4.1$  Hz, 1H, H2), 7.32 (dd,  $J = 8.7, 7.7$  Hz, 1H,  $\text{CH}_{\text{Ar}}$ ), 7.75 (d,  $J = 7.7$  Hz, 1H,  $\text{CH}_{\text{Ar}}$ ), 8.05-8.14 (m, 2H,  $\text{CH}_{\text{Ar}}$ ), 8.82 (dd,  $J = 4.1, 1.8$  Hz, 1H, H3).

$^{13}\text{C}$  NMR (75 MHz,  $\text{CDCl}_3$ ):  $\delta$  114.1 (C2-H), 116.7 (C5), 123.1 (d,  $^2J_{\text{CF}} = 9.6$  Hz, C6), 124.0 (C3-H), 124.5 ( $\text{CH}_{\text{Ar}}$ ), 125.1 ( $\text{CH}_{\text{Ar}}$ ), 125.9 (d,  $^2J_{\text{CF}} = 28.0$  Hz, C7a), 128.1 ( $\text{CH}_{\text{Ar}}$ ), 128.6 (d,  $^3J_{\text{CF}} = 2.3$  Hz,  $\text{C}_{\text{Ar}}$ ), 128.9 ( $\text{CH}_{\text{Ar}}$ ), 131.8 (br s,  $\text{CH}_{\text{Ar}}$ ), 133.9 ( $\text{C}_{\text{Ar}}\text{-Cl}$ ), 134.4 ( $\text{CH}_{\text{Ar}}$ ), 139.9 ( $\text{C}_{\text{Ar}}$ ), 141.4 (d,  $^1J_{\text{CF}} = 243.8$  Hz, C7-F), 147.0 ( $\text{C}_{\text{Ar}}\text{-NO}_2$ ), 181.5 (d,  $^4J_{\text{CF}} = 3.0$  Hz,  $\text{C}=\text{O}$ ).

$^{19}\text{F}$  NMR (282 MHz,  $\text{CDCl}_3$ ):  $\delta$  -169.5 (s).

HRMS (ESI):  $m/z$  calcd. for  $[\text{C}_{19}\text{H}_{10}\text{ClFN}_2\text{O}_3\text{S} + \text{H}^+]$ : 401.0157, found: 401.0149.

### Ethyl 6-(4-chlorophenyl)-7-fluoropyrrolo[2,1-*b*][1,3]thiazole-5-carboxylate **3g**

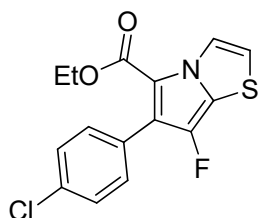

Pyrrolo[2,1-*b*]thiazole **3g** was obtained from  $\alpha$ -fluoronitroalkene **1a** (40.3 mg, 0.2 mmol) and thiazolium salt **2d** (3.0 equiv.) following the general procedure 1 (reaction time 2 days). Column chromatography (eluent: 19:1 to 9:1 PE/EtOAc) afforded **3g** (36 mg, 57%) as a white solid.

$R_f = 0.47$  (PE/EtOAc, 3:1) (UV), mp = 102-103°C ( $\text{CHCl}_3$ )

$^1\text{H}$  NMR (300 MHz,  $\text{CDCl}_3$ ):  $\delta$  1.18 (t,  $J = 7.1$  Hz, 3H,  $\text{CH}_3$ ), 4.22 (q,  $J = 7.1$  Hz, 2H,  $\text{CH}_2$ ), 6.84 (d,  $J = 4.2$  Hz, 1H, H2), 7.36-7.45 (m, 4H,  $\text{CH}_{\text{Ar}}$ ), 8.43 (dd,  $J = 4.2, 1.9$  Hz, 1H, H3).

$^{13}\text{C}$  NMR (75 MHz,  $\text{CDCl}_3$ ):  $\delta$  14.1 ( $\text{CH}_3$ ), 60.1 ( $\text{CH}_2$ ), 108.0 (d,  $^3J_{\text{CF}} = 1.5$  Hz, C5), 112.3 (C2-H), 121.1 (d,  $^2J_{\text{CF}} = 28.1$  Hz, C7a), 121.8 (d,  $^2J_{\text{CF}} = 10.0$  Hz, C6), 123.3 (C3-H), 127.8 ( $\text{CH}_{\text{Ar}}$ ), 129.4 (d,  $^3J_{\text{CF}} = 2.4$  Hz,  $\text{C}_{\text{Ar}}$ ), 131.9 (d,  $^4J_{\text{CF}} = 1.0$  Hz,  $\text{CH}_{\text{Ar}}$ ), 133.6 ( $\text{C}_{\text{Ar}}\text{-Cl}$ ), 141.2 (d,  $^1J_{\text{CF}} = 240.3$  Hz, C7-F), 160.7 (d,  $^4J_{\text{CF}} = 2.7$  Hz,  $\text{CO}_2\text{Et}$ ).

$^{19}\text{F}$  NMR (282 MHz,  $\text{CDCl}_3$ ):  $\delta$  -171.1 (br s).

HRMS (ESI):  $m/z$  calcd. for  $[\text{C}_{15}\text{H}_{11}\text{ClFNO}_2\text{S} + \text{Na}^+]$ : 346.0075, found: 346.0069.

### Benzyl 6-(4-chlorophenyl)-7-fluoropyrrolo[2,1-b][1,3]thiazole-5-carboxylate **3h**

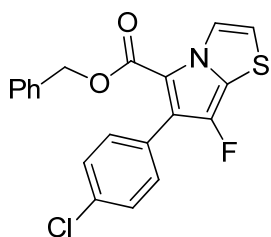

Pyrrolo[2,1-b]thiazole **3h** was obtained from  $\alpha$ -fluoronitroalkene **1a** (30.3 mg, 0.15 mmol) and thiazolium salt **2e** (3.5 equiv.) following the general procedure 1 (reaction time 3 days). Column chromatography (eluent: 19:1 to 9:1 PE/EtOAc) afforded **3h** (28.5 mg, 50%) as a white solid.

$R_f = 0.65$  (PE/EtOAc, 3:1) (UV), mp = 101-103°C ( $\text{CHCl}_3$ )

$^1\text{H}$  NMR (300 MHz,  $\text{CDCl}_3$ ):  $\delta$  5.18 (s, 2H,  $\text{CH}_2$ ), 6.84 (d,  $J = 4.2$  Hz, 1H, H2), 7.08 (dd,  $J = 6.5, 2.9$  Hz, 2H,  $\text{CH}_{\text{Ar}}$ ), 7.26-7.32 (m, 5H,  $\text{CH}_{\text{Ar}}$ ), 7.36 (d,  $J = 8.3$  Hz, 2H,  $\text{CH}_{\text{Ar}}$ ), 8.44 (dd,  $J = 4.2, 1.9$  Hz, 1H, H3).

$^{13}\text{C}$  NMR (75 MHz,  $\text{CDCl}_3$ ):  $\delta$  65.9 ( $\text{CH}_2$ ), 107.8 (d,  $^3J_{\text{CF}} = 1.7$  Hz, C5), 112.5 (C2-H), 121.6 (d,  $^2J_{\text{CF}} = 28.1$  Hz, C7a), 122.1 (d,  $^2J_{\text{CF}} = 10.6$  Hz, C6), 123.3 (C3-H), 127.9 ( $\text{CH}_{\text{Ar}}$ ), 128.0 ( $\text{CH}_{\text{Ar}}$ ), 128.1 ( $\text{CH}_{\text{Ar}}$ ), 128.4 ( $\text{CH}_{\text{Ar}}$ ), 129.3 (d,  $^3J_{\text{CF}} = 2.2$  Hz,  $\text{C}_{\text{Ar}}$ ), 131.9 (d,  $^4J_{\text{CF}} = 0.9$  Hz,  $\text{CH}_{\text{Ar}}$ ), 133.7 ( $\text{C}_{\text{Ar}}\text{-Cl}$ ), 135.5 ( $\text{C}_{\text{Ar}}$ ), 141.2 (d,  $^1J_{\text{CF}} = 240.4$  Hz, C7-F), 160.5 (d,  $^4J_{\text{CF}} = 2.9$  Hz,  $\text{CO}_2\text{Et}$ ).

$^{19}\text{F}$  NMR (282 MHz,  $\text{CDCl}_3$ ):  $\delta$  -171.4 (br s).

HRMS (ESI):  $m/z$  calcd. for  $[\text{C}_{20}\text{H}_{13}\text{ClFNO}_2\text{S} + \text{H}^+]$ : 386.0412, found: 386.0418.

### 1-[6-(4-Chlorophenyl)-7-fluoropyrrolo[2,1-b][1,3]thiazol-5-yl]ethan-1-one **3i**

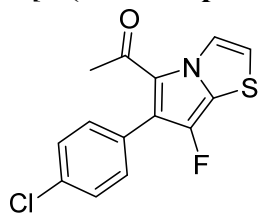

Pyrrolo[2,1-b]thiazole **3i** was obtained from  $\alpha$ -fluoronitroalkene **1a** (40.3 mg, 0.2 mmol) and thiazolium salt **2f** (3.0 equiv.) following the general procedure 1 (reaction time 48 h). Column

chromatography (eluent: 19:1 to 9:1 PE/EtOAc) afforded **3i** (26.5 mg, 44%) as a colorless oil, which solidifies upon storage in a refrigerator.

$R_f = 0.35$  (PE/EtOAc, 3:1) (UV)

$^1\text{H NMR}$  (300 MHz,  $\text{CDCl}_3$ ):  $\delta$  1.99 (s, 3H, Me), 6.89 (d,  $J = 4.1$  Hz, 1H, H2), 7.36-7.39 (m, 2H,  $\text{CH}_{\text{Ar}}$ ), 7.45-7.48 (m, 2H,  $\text{CH}_{\text{Ar}}$ ), 8.82 (dd,  $J = 4.1, 1.8$  Hz, 1H, H3).

$^{13}\text{C NMR}$  (75 MHz,  $\text{CDCl}_3$ ):  $\delta$  28.3 (Me), 112.9 (C2-H), 118.3 (C5), 122.0 (d,  $^2J_{\text{CF}} = 10.3$  Hz, C6), 123.3 (d,  $^2J_{\text{CF}} = 28.1$  Hz, C7a), 124.3 (C3-H), 128.8 ( $\text{CH}_{\text{Ar}}$ ), 129.8 (d,  $^3J_{\text{CF}} = 1.9$  Hz,  $\text{C}_{\text{Ar}}$ ), 131.8 (br s,  $\text{CH}_{\text{Ar}}$ ), 134.7 ( $\text{C}_{\text{Ar}}\text{-Cl}$ ), 141.5 (d,  $^1J_{\text{CF}} = 241.0$  Hz, C7-F), 186.2 (d,  $^4J_{\text{CF}} = 2.8$  Hz, C=O).

$^{19}\text{F NMR}$  (282 MHz,  $\text{CDCl}_3$ ):  $\delta$  -171.0 (d,  $J = 1.8$  Hz).

HRMS (ESI):  $m/z$  calcd. for  $[\text{C}_{14}\text{H}_9\text{ClFNOS} + \text{H}^+]$ : 293.0072, found: 293.0068.

#### Ethyl 5-benzoyl-6-(4-chlorophenyl)pyrrolo[2,1-*b*][1,3]thiazole-7-carboxylate **4a**

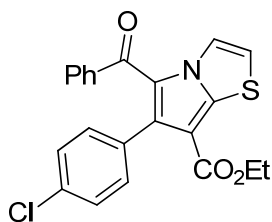

Pyrrolo[2,1-*b*]thiazole **4a** was obtained from nitroalkene **1e** (37 mg, 0.145 mmol) and thiazolium salt **2a** (2.5 equiv.) following the general procedure 1 (reaction time 10 h). Column chromatography (eluent: 5:1 PE/EtOAc) afforded **3k** (39 mg, 66%) as a slightly yellow solid.

$R_f = 0.33$  (PE/EtOAc, 3:1) (UV), mp = 158-161°C ( $\text{CHCl}_3$ )

$^1\text{H NMR}$  (300 MHz,  $\text{CDCl}_3$ ):  $\delta$  1.25 (t,  $J = 7.1$  Hz, 3H,  $\text{CH}_3$ ), 4.24 (q,  $J = 7.1$  Hz, 2H,  $\text{CH}_2$ ), 6.92-6.98 (m, 2H,  $\text{CH}_{\text{Ar}}$ ), 6.99-7.07 (m, 4H,  $\text{CH}_{\text{Ar}}$ ), 7.13 (d,  $J = 4.2$  Hz, 1H, H2), 7.20-7.32 (m, 3H,  $\text{CH}_{\text{Ar}}$ ), 8.74 (d,  $J = 4.2$  Hz, 1H, H3).

$^{13}\text{C NMR}$  (75 MHz,  $\text{CDCl}_3$ ):  $\delta$  14.3 ( $\text{CH}_3$ ), 60.3 ( $\text{CH}_2$ ), 105.3 (C7), 115.4 (C2-H), 123.9 ( $\text{C}_q$ ), 124.3 (C3-H), 127.0 ( $\text{CH}_{\text{Ar}}$ ), 127.5 ( $\text{CH}_{\text{Ar}}$ ), 128.8 ( $\text{CH}_{\text{Ar}}$ ), 130.9 ( $\text{CH}_{\text{Ar}}$ ), 131.4 ( $\text{C}_q$ ), 132.5 ( $\text{CH}_{\text{Ar}}$ ), 133.5 ( $\text{C}_q$ ), 138.0 ( $\text{C}_q$ ), 138.1 ( $\text{C}_q$ ), 144.7 ( $\text{C}_q$ ), 162.9 ( $\text{CO}_2\text{Et}$ ), 186.8 (COPh).

HRMS (ESI):  $m/z$  calcd. for  $[\text{C}_{22}\text{H}_{16}\text{ClNO}_3\text{S} + \text{H}^+]$ : 410.0612, found: 410.0604.

#### Ethyl 5-benzoyl-6-(2-bromophenyl)pyrrolo[2,1-*b*][1,3]thiazole-7-carboxylate **4b**

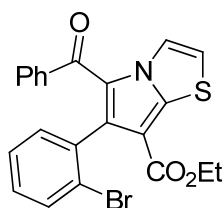

Pyrrolo[2,1-b]thiazole **4b** was obtained from  $\alpha$ -fluoronitroalkene **1f** (60 mg, 0.2 mmol) and thiazolium salt **2a** (2.5 equiv.) following the general procedure 1 (reaction time 5 h). Column chromatography (eluent: 5:1 PE/EtOAc) afforded **4b** (72 mg, 79%) as a slightly yellow solid.

$R_f = 0.35$  (PE/EtOAc, 3:1) (UV), mp = 123-126°C (CHCl<sub>3</sub>)

<sup>1</sup>H NMR (300 MHz, CDCl<sub>3</sub>):  $\delta$  1.13 (t,  $J = 7.1$  Hz, 3H, CH<sub>3</sub>), 4.06-4.28 (m, 2H, CH<sub>2</sub>), 6.89-6.91 (m, 3H, CH<sub>Ar</sub>), 7.03 (t,  $J = 7.5$  Hz, 1H), 7.14 (d,  $J = 4.2$  Hz, 1H, H<sub>2</sub>), 7.12-7.18 (m, 1H, CH<sub>Ar</sub>), 7.32-7.36 (m, 1H, CH<sub>Ar</sub>), 7.40-7.44 (m, 2H, CH<sub>Ar</sub>), 8.77 (d,  $J = 4.2$  Hz, 1H, H<sub>3</sub>).

<sup>13</sup>C NMR (75 MHz, CDCl<sub>3</sub>):  $\delta$  14.0 (CH<sub>3</sub>), 60.2 (CH<sub>2</sub>), 106.3 (C<sub>7</sub>), 115.3 (C<sub>2</sub>-H), 123.7 (C<sub>q</sub>), 124.4 (C<sub>3</sub>-H), 125.1 (C<sub>Ar</sub>-Br), 126.0 (CH<sub>Ar</sub>), 127.2 (CH<sub>Ar</sub>), 128.2 (CH<sub>Ar</sub>), 128.8 (CH<sub>Ar</sub>), 130.8 (CH<sub>Ar</sub>), 131.7 (CH<sub>Ar</sub>), 132.4 (CH<sub>Ar</sub>), 134.9 (C<sub>q</sub>), 137.1 (C<sub>q</sub>), 138.5 (C<sub>q</sub>), 144.3 (C<sub>q</sub>), 162.9 (CO<sub>2</sub>Et), 186.6 (COPh).

HRMS (ESI):  $m/z$  calcd. for [C<sub>22</sub>H<sub>16</sub>BrNO<sub>3</sub>S + H<sup>+</sup>]: 454.0107, found: 454.0098.

#### Ethyl 6-(4-chlorophenyl)-5-(3-methoxybenzoyl)pyrrolo[2,1-b][1,3]thiazole-7-carboxylate **4c**

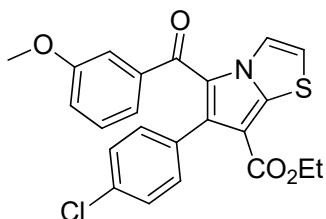

Pyrrolo[2,1-b]thiazole **4c** was obtained from  $\alpha$ -fluoronitroalkene **1e** (35 mg, 0.137 mmol) and thiazolium salt **2b** (2.5 equiv.) following the general procedure 1 (reaction time 4 h). Column chromatography (eluent: 4:1 PE/EtOAc) afforded **4c** (41 mg, 68%) as an amorphous slightly yellow solid.

$R_f = 0.26$  (PE/EtOAc, 3:1) (UV).

<sup>1</sup>H NMR (300 MHz, CDCl<sub>3</sub>):  $\delta$  1.25 (t,  $J = 7.1$  Hz, 3H, CH<sub>3</sub>), 3.69 (s, 3H, OMe), 4.23 (q,  $J = 7.1$  Hz, 2H, CH<sub>2</sub>), 6.74-6.80 (m, 1H, CH<sub>Ar</sub>), 6.89 (dt,  $J = 7.5, 1.2$  Hz, 1H, CH<sub>Ar</sub>), 6.93-7.06 (m, 5H, CH<sub>Ar</sub>), 7.12 (d,  $J = 4.2$  Hz, 1H, H<sub>2</sub>), 8.73 (d,  $J = 4.2$  Hz, 1H, H<sub>3</sub>).

<sup>13</sup>C NMR (75 MHz, CDCl<sub>3</sub>):  $\delta$  14.2 (CH<sub>3</sub>), 55.2 (OMe), 60.3 (CH<sub>2</sub>), 105.3 (C<sub>7</sub>), 114.0 (CH<sub>Ar</sub>), 115.4 (C<sub>2</sub>-H), 116.7 (CH<sub>Ar</sub>), 121.3 (CH<sub>Ar</sub>), 123.8 (C<sub>q</sub>), 124.3 (C<sub>3</sub>-H), 127.0 (CH<sub>Ar</sub>), 128.8 (CH<sub>Ar</sub>), 131.5 (C<sub>q</sub>), 132.2 (CH<sub>Ar</sub>), 133.4 (C<sub>q</sub>), 138.1 (C<sub>q</sub>), 139.5 (C<sub>q</sub>), 144.7 (C<sub>q</sub>), 158.6 (C<sub>Ar</sub>-OMe), 162.9 (CO<sub>2</sub>Et), 186.4 (COPh).

HRMS (ESI):  $m/z$  calcd. for [C<sub>23</sub>H<sub>18</sub>ClNO<sub>4</sub>S + H<sup>+</sup>]: 410.0612, found: 410.0604.

### Ethyl 6-(4-chlorophenyl)-5-(3-nitrobenzoyl)pyrrolo[2,1-b][1,3]thiazole-7-carboxylate **4d**

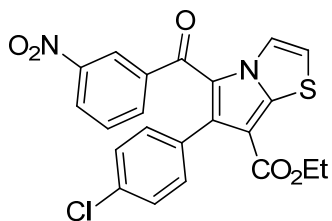

Pyrrolo[2,1-b]thiazole **4d** was obtained from  $\alpha$ -fluoronitroalkene **1e** (44 mg, 0.172 mmol) and thiazolium salt **2c** (2.5 equiv.) following the general procedure 1 (reaction time 2 h). Column chromatography (eluent: 4:1 PE/EtOAc) afforded **4d** (36.5 mg, 51%) as a dark yellow solid.

$R_f$  = 0.19 (PE/EtOAc, 3:1) (UV), mp = 172-175°C (CHCl<sub>3</sub>)

<sup>1</sup>H NMR (300 MHz, CDCl<sub>3</sub>):  $\delta$  1.23 (t,  $J$  = 7.1 Hz, 3H, CH<sub>3</sub>), 4.23 (q,  $J$  = 7.1 Hz, 2H, CH<sub>2</sub>), 6.94 (d,  $J$  = 8.4 Hz, 2H, CH<sub>Ar</sub>), 7.00-7.06 (m, 2H, CH<sub>Ar</sub>), 7.20 (d,  $J$  = 4.2 Hz, 1H, H<sub>2</sub>), 7.32 (t,  $J$  = 7.9 Hz, 1H, CH<sub>Ar</sub>), 7.70 (app dt,  $J$  = 7.7, 1.3 Hz, 1H, CH<sub>Ar</sub>), 7.99 (t,  $J$  = 1.8 Hz, 1H, CH<sub>Ar</sub>), 8.09 (ddd,  $J$  = 8.2, 2.3, 1.1 Hz, 1H, CH<sub>Ar</sub>), 8.78 (d,  $J$  = 4.2 Hz, 1H, H<sub>3</sub>).

<sup>13</sup>C NMR (75 MHz, CDCl<sub>3</sub>):  $\delta$  14.2 (CH<sub>3</sub>), 60.5 (CH<sub>2</sub>), 106.1 (C7), 116.1 (C2-H), 123.3 (C<sub>q</sub>), 124.1 (CH), 124.3 (CH), 125.0 (CH), 127.2 (CH<sub>Ar</sub>), 128.9 (CH<sub>Ar</sub>), 131.1 (C<sub>q</sub>), 132.4 (CH<sub>Ar</sub>), 133.9 (C<sub>q</sub>), 134.0 (CH<sub>Ar</sub>), 138.7 (C<sub>q</sub>), 139.7 (C<sub>q</sub>), 145.5 (C<sub>q</sub>), 146.9 (C<sub>Ar</sub>-NO<sub>2</sub>), 162.6 (CO<sub>2</sub>Et), 183.5 (COPh).

HRMS (ESI):  $m/z$  calcd. for [C<sub>22</sub>H<sub>15</sub>ClN<sub>2</sub>O<sub>5</sub>S + H<sup>+</sup>]: 455.0463, found: 455.0454.

### Diethyl 6-(4-chlorophenyl)pyrrolo[2,1-b][1,3]thiazole-5,7-dicarboxylate **4e**

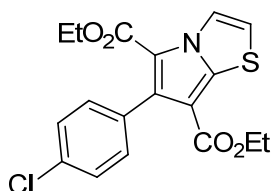

Pyrrolo[2,1-b]thiazole **4e** was obtained from nitroalkene **1e** (51.6 mg, 0.2 mmol) and thiazolium salt **2d** (3.0 equiv.) following the general procedure 1 (reaction time 2 days). Column chromatography (eluent: 19:1 to 5:1 PE/EtOAc) afforded **4e** (37.5 mg, 47%) as a white solid.

$R_f$  = 0.38 (PE/EtOAc, 3:1) (UV), mp = 114-115°C (CHCl<sub>3</sub>)

<sup>1</sup>H NMR (300 MHz, CDCl<sub>3</sub>):  $\delta$  1.05 (t,  $J$  = 7.1 Hz, 3H, CH<sub>3</sub>), 1.20 (t,  $J$  = 7.1 Hz, 3H, CH<sub>3</sub>), 4.13 (q,  $J$  = 7.1 Hz, 2H, CH<sub>2</sub>), 4.19 (q,  $J$  = 7.1 Hz, 2H, CH<sub>2</sub>), 7.05 (d,  $J$  = 4.2 Hz, 1H, H<sub>2</sub>), 7.27-7.38 (m, 4H, CH<sub>Ar</sub>), 8.48 (d,  $J$  = 4.2 Hz, 1H, H<sub>3</sub>).

<sup>13</sup>C NMR (75 MHz, CDCl<sub>3</sub>):  $\delta$  13.8 (CH<sub>3</sub>), 14.2 (CH<sub>3</sub>), 60.1 (CH<sub>2</sub>), 60.3 (CH<sub>2</sub>), 105.7 (C7), 114.9 (C2-H), 115.0 (C<sub>q</sub>), 123.6 (C3-H), 127.1 (CH<sub>Ar</sub>), 131.4 (CH<sub>Ar</sub>), 132.7 (C<sub>q</sub>), 133.3 (C<sub>q</sub>), 137.0 (C<sub>q</sub>), 142.6 (C<sub>q</sub>), 160.7 (CO<sub>2</sub>Et), 163.0 (CO<sub>2</sub>Et).

HRMS (ESI):  $m/z$  calcd. for [C<sub>18</sub>H<sub>16</sub>ClNO<sub>4</sub>S + H<sup>+</sup>]: 378.0561, found: 378.0560.

### General procedure 2 for the synthesis of 7-unsubstituted pyrrolo[2,1-b]thiazoles 5

To the solution of thiazolium salt **2** (0.5 mmol, 2.5 equiv.) in dry MeCN (1 ml) powdered 4Å molecular sieves (100 mg) and 2,6-lutidine (107 mg, 1 mmol, 5 equiv.) were added, followed by addition of nitroalkene **1** (0.2 mmol, 1.0 equiv.) and Cu(OCOCF<sub>3</sub>)<sub>2</sub>·H<sub>2</sub>O (92 mg, 0.3 mmol, 1.5 equiv.) The mixture was stirred at r. t. for 5-24 hours. After the reaction was complete (TLC monitoring), it was evaporated after addition of silica gel. Crude product was purified by column chromatography using PE/EtOAc as an eluent to give pyrrolo[2,1-b]thiazoles **5**.

### **[6-(4-Chlorophenyl)pyrrolo[2,1-b][1,3]thiazol-5-yl](phenyl)methanone 5a**

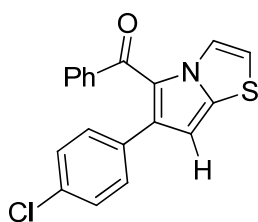

Pyrrolo[2,1-b]thiazole **5a** was obtained from nitroalkene **1g** (37 mg, 0.2 mmol) and thiazolium salt **2a** (2.5 equiv.) following the general procedure 2 (reaction time 5 h). Column chromatography (eluent: 15:1 to 5:1 PE/EtOAc) afforded **5a** (32 mg, 53%) as a slightly yellow solid.

R<sub>f</sub> = 0.41 (PE/EtOAc, 3:1) (UV), mp = 141-142°C (CHCl<sub>3</sub>)

<sup>1</sup>H NMR (300 MHz, CDCl<sub>3</sub>, COSY): δ 6.42 (s, 1H, H7), 6.93-6.98 (m, 5H, CH<sub>Ar</sub>, H2), 7.02-7.08 (m, 2H, CH<sub>Ar</sub>), 7.20-7.27 (m, 1H, CH<sub>Ar</sub>), 7.37-7.41 (m, 2H, CH<sub>Ar</sub>), 8.75 (d, *J* = 4.2 Hz, 1H, H3).

<sup>13</sup>C NMR (75 MHz, CDCl<sub>3</sub>, HSQC, HMBC): δ 101.7 (C7-H), 113.1 (C2-H), 121.4 (C6), 124.0 (C3-H), 127.5 (CH<sub>Ar</sub>), 127.7 (CH<sub>Ar</sub>), 129.2 (CH<sub>Ar</sub>), 130.8 (CH<sub>Ar</sub>), 130.9 (CH<sub>Ar</sub>), 132.7 (C<sub>Ar</sub>-Cl), 134.2 (C<sub>Ar</sub>), 138.9 (C<sub>q</sub>), 139.0 (C<sub>q</sub>), 139.1 (C<sub>q</sub>), 185.1 (C=O).

HRMS (ESI): *m/z* calcd. for [C<sub>19</sub>H<sub>12</sub>ClNOS + H<sup>+</sup>]: 338.0401, found: 338.0396.

### **Phenyl(6-phenylpyrrolo[2,1-b][1,3]thiazol-5-yl)methanone 5b**

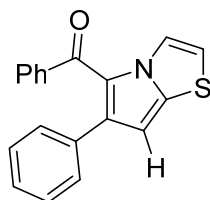

Pyrrolo[2,1-b]thiazole **5b** was obtained from nitroalkene **1h** (37 mg, 0.2 mmol) and thiazolium salt **2a** (2.5 equiv.) following the general procedure 2 (reaction time 5 h). Column chromatography (eluent: 15:1 to 7:1 PE/EtOAc) afforded **5b** (44 mg, 58%) as a slightly yellow solid.

$R_f = 0.46$  (PE/EtOAc, 3:1) (UV) mp = 106-109°C (CHCl<sub>3</sub>)

<sup>1</sup>H NMR (300 MHz, CDCl<sub>3</sub>): δ 6.46 (s, 1H, H7), 6.93 (d,  $J = 4.2$  Hz, 1H, H2), 6.98-7.07 (m, 7H, CH<sub>Ar</sub>), 7.12-7.20 (m, 1H, CH<sub>Ar</sub>), 7.38-7.44 (m, 2H, CH<sub>Ar</sub>), 8.77 (d,  $J = 4.2$  Hz, 1H, H3).

<sup>13</sup>C NMR (75 MHz, CDCl<sub>3</sub>, HSQC, HMBC): δ 101.8 (C7-H), 112.8 (C2-H), 121.4 (C6), 124.0 (C3-H), 126.6 (CH<sub>Ar</sub>), 127.3 (CH<sub>Ar</sub>), 127.5 (CH<sub>Ar</sub>), 129.3 (CH<sub>Ar</sub>), 129.8 (CH<sub>Ar</sub>), 130.6 (CH<sub>Ar</sub>), 135.6 (C<sub>Ar</sub>), 139.0 (C<sub>q</sub>), 139.1 (C<sub>q</sub>), 140.4 (C<sub>q</sub>), 185.3 (C=O).

HRMS (ESI):  $m/z$  calcd. for [C<sub>19</sub>H<sub>13</sub>NOS + H<sup>+</sup>]: 304.0791, found: 304.0802.

### [6-(2-Bromophenyl)pyrrolo[2,1-*b*][1,3]thiazol-5-yl](phenyl)methanone **5c**

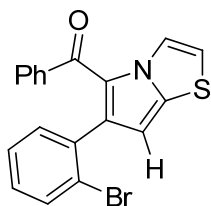

Pyrrolo[2,1-*b*]thiazole **5c** was obtained from nitroalkene **1j** (45.6 mg, 0.2 mmol) and thiazolium salt **2b** (2.5 equiv.) following the general procedure 2 (reaction time 6 h). Column chromatography (eluent: 15:1 to 7:1 PE/EtOAc) afforded **5c** (49 mg, 64%) as a slightly yellow oil, which solidifies upon storage in a refrigerator.

$R_f = 0.38$  (PE/EtOAc, 3:1) (UV)

<sup>1</sup>H NMR (300 MHz, CDCl<sub>3</sub>): δ 6.44 (s, 1H, H7), 6.86-7.04 (m, 6H, CH<sub>Ar</sub>), 7.10-7.16 (m, 1H, CH<sub>Ar</sub>), 7.34 (dd,  $J = 6.9, 1.7$  Hz, CH<sub>Ar</sub>), 7.42 (d,  $J = 7.3$  Hz, 2H), 8.79 (d,  $J = 4.1$  Hz, 1H, H3).

<sup>13</sup>C NMR (75 MHz, CDCl<sub>3</sub>): δ 103.0 (C7-H), 113.2 (C2-H), 122.0 (C6), 123.8 (C<sub>Ar</sub>-Br), 124.0 (C3-H), 126.3 (CH<sub>Ar</sub>), 127.1 (CH<sub>Ar</sub>), 128.5 (CH<sub>Ar</sub>), 128.7 (CH<sub>Ar</sub>), 130.4 (CH<sub>Ar</sub>), 132.3 (CH<sub>Ar</sub>), 132.8 (CH<sub>Ar</sub>), 136.7 (C<sub>Ar</sub>), 137.9 (C<sub>q</sub>), 138.9 (C<sub>q</sub>), 139.0 (C<sub>q</sub>), 185.0 (C=O).

HRMS (ESI):  $m/z$  calcd. for [C<sub>19</sub>H<sub>12</sub>BrNOS + H<sup>+</sup>]: 381.9896, found: 381.9894.

### [6-(4-Methoxyphenyl)pyrrolo[2,1-*b*][1,3]thiazol-5-yl](phenyl)methanone **5d**

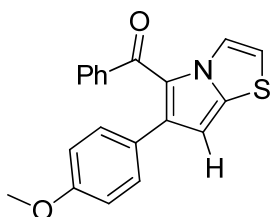

Pyrrolo[2,1-*b*]thiazole **5d** was obtained from nitroalkene **1i** (35 mg, 0.2 mmol) and thiazolium salt **2a** (3.0 equiv.) following the general procedure 2 (reaction time 24 h). Column chromatography (eluent: 5:1 PE/EtOAc) afforded **5d** (31 mg, 47%) as an amorphous yellow solid.

$R_f = 0.34$  (PE/EtOAc, 3:1) (UV)

$^1\text{H}$  NMR (300 MHz,  $\text{CDCl}_3$ ):  $\delta$  3.70 (s, 3H, OMe), 6.41 (s, 1H, H7), 6.55 (d,  $J = 8.8$  Hz, 2H,  $\text{CH}_{\text{Ar}}$ ), 6.91 (d,  $J = 4.2$  Hz, 1H, H2), 6.96 (d,  $J = 8.8$  Hz, 2H,  $\text{CH}_{\text{Ar}}$ ), 7.03 (t,  $J = 7.6$  Hz, 2H), 7.15-7.21 (m, 1H,  $\text{CH}_{\text{Ar}}$ ), 7.38-7.43 (m, 2H,  $\text{CH}_{\text{Ar}}$ ), 8.75 (d,  $J = 4.2$  Hz, 1H, H3).

$^{13}\text{C}$  NMR (75 MHz,  $\text{CDCl}_3$ ):  $\delta$  55.2 (OMe), 101.7 (C7-H), 112.5 (C2-H), 113.1 ( $\text{CH}_{\text{Ar}}$ ), 121.4 (C6), 124.0 (C3-H), 127.3 ( $\text{CH}_{\text{Ar}}$ ), 128.1 ( $\text{C}_{\text{Ar}}$ ), 129.3 ( $\text{CH}_{\text{Ar}}$ ), 130.5 ( $\text{CH}_{\text{Ar}}$ ), 130.9 ( $\text{CH}_{\text{Ar}}$ ), 139.0 ( $\text{C}_q$ ), 139.1 ( $\text{C}_q$ ), 140.2 ( $\text{C}_q$ ), 158.5 ( $\text{C}_{\text{Ar}}\text{-OMe}$ ), 185.2 (C=O).

HRMS (ESI):  $m/z$  calcd. for  $[\text{C}_{20}\text{H}_{15}\text{NO}_2\text{S} + \text{H}^+]$ : 334.0896, found: 334.0900.

### [6-(5-Bromothiophen-2-yl)pyrrolo[2,1-*b*][1,3]thiazol-5-yl](phenyl)methanone **5e**

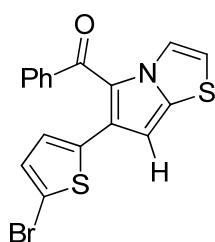

Pyrrolo[2,1-*b*]thiazole **5e** was obtained from nitroalkene **1k** (46.8 mg, 0.2 mmol) and thiazolium salt **2a** (3.0 equiv.) following the general procedure 2 (reaction time 24h). Column chromatography (eluent: 9:1 PE/EtOAc) afforded **5e** (43 mg, 56%) as a slightly yellow solid.

$R_f = 0.44$  (PE/EtOAc, 3:1) (UV), mp = 119-123°C ( $\text{CHCl}_3$ )

$^1\text{H}$  NMR (300 MHz,  $\text{CDCl}_3$ , COSY):  $\delta$  6.21 (d,  $J = 3.8$  Hz, 1H, thiophene), 6.44 (s, 1H, H7), 6.57 (d,  $J = 3.8$  Hz, 1H, thiophene), 6.95 (d,  $J = 4.2$  Hz, 1H, H2), 7.19 (t,  $J = 7.6$  Hz, 2H,  $\text{CH}_{\text{Ar}}$ ), 7.30-7.37 (m, 1H,  $\text{CH}_{\text{Ar}}$ ), 7.50-7.55 (m, 2H,  $\text{CH}_{\text{Ar}}$ ), 8.68 (d,  $J = 4.2$  Hz, 1H, H3).

$^{13}\text{C}$  NMR (75 MHz,  $\text{CDCl}_3$ , HSQC):  $\delta$  102.3 (C7-H), 112.1 (C(thiophene)-Br), 113.5 (C2-H), 121.5 (C6), 123.8 (C3-H), 127.8 ( $\text{CH}_{\text{Ph}}$ ), 128.2 (CH(thiophene)), 128.9 ( $\text{CH}_{\text{Ph}}$ ), 129.5 (CH(thiophene)), 130.6 ( $\text{C}_q$ (thiophene)), 131.1 ( $\text{CH}_{\text{Ph}}$ ), 138.5 ( $\text{C}_q$ ), 139.0 ( $\text{C}_q$ ), 139.1 ( $\text{C}_q$ ), 185.0 (C=O).

HRMS (ESI):  $m/z$  calcd. for  $[\text{C}_{17}\text{H}_{10}\text{BrNOS}_2 + \text{H}^+]$ : 387.9460, found: 387.9468.

### Phenyl[6-(2-phenylethyl)pyrrolo[2,1-*b*][1,3]thiazol-5-yl]methanone **5f**

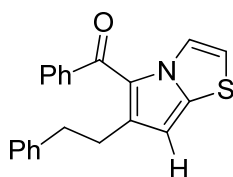

Pyrrolo[2,1-*b*]thiazole **5f** was obtained from  $\alpha$ -fluoronitroalkene **1l** (35.4 mg, 0.2 mmol) and thiazolium salt **2a** (2.5 equiv.) following the general procedure 2 (reaction time 24 h). Column



chromatography (eluent: 9:1 PE/EtOAc) afforded **5f** (30.5 mg, 45%) as a slightly yellow oil, which solidifies upon storage in a refrigerator.

$R_f = 0.34$  (PE/EtOAc, 3:1) (UV)

$^1\text{H NMR}$  (300 MHz,  $\text{CDCl}_3$ ):  $\delta$  2.54-2.73 (m, 4H, 2\* $\text{CH}_2$ ), 6.27 (s, 1H, H7), 6.82 (d,  $J = 6.4$  Hz, 2H,  $\text{CH}_{\text{Ar}}$ ), 6.85 (d,  $J = 4.3$  Hz, 1H, H2), 7.09-7.21 (m, 3H,  $\text{CH}_{\text{Ar}}$ ), 7.42-7.55 (m, 3H,  $\text{CH}_{\text{Ar}}$ ), 7.61-7.66 (m, 2H,  $\text{CH}_{\text{Ar}}$ ), 8.59 (d,  $J = 4.2$  Hz, 1H, H3).

$^{13}\text{C NMR}$  (75 MHz,  $\text{CDCl}_3$ ):  $\delta$  30.6 ( $\text{CH}_2$ ), 37.9 ( $\text{CH}_2$ ), 101.7 (C7-H), 112.1 (C2-H), 122.5 (C6), 124.1 (C3-H), 125.8 ( $\text{CH}_{\text{Ar}}$ ), 128.0 ( $\text{CH}_{\text{Ar}}$ ), 128.2 ( $\text{CH}_{\text{Ar}}$ ), 128.4 ( $\text{CH}_{\text{Ar}}$ ), 130.7 ( $\text{CH}_{\text{Ar}}$ ), 139.6 ( $\text{C}_q$ ), 140.1 (2\* $\text{C}_q$ ), 141.1 ( $\text{C}_q$ ), 141.2 ( $\text{C}_q$ ), 184.9 (C=O).

HRMS (ESI):  $m/z$  calcd. for  $[\text{C}_{21}\text{H}_{17}\text{NOS} + \text{H}^+]$ : 332.1104, found: 332.1102.

### General procedure 3 for the synthesis of pyrrolo[1,2-b]indazoles 7.

To the solution of indazolium salt **6** (0.25 mmol, 2.5 equiv.) in dry DMSO (0.5 ml) powdered 4Å molecular sieves (100 mg) and 2,6-lutidine (54 mg, 0.5 mmol, 5 equiv.) were added, followed by addition of nitroalkene **1** (0.1 mmol, 1.0 equiv.) and  $\text{Cu}(\text{OCOCF}_3)_2 \cdot \text{H}_2\text{O}$  (62 mg, 0.2 mmol, 2.0 equiv.) The mixture was stirred at r. t. for 24 hours (for **7c** and **7f** – 3 days). After the reaction was complete (TLC monitoring), it was quenched with EtOAc/1% aqueous  $\text{Na}_2\text{EDTA}$  solution (20+20 ml). Aqueous layer was extracted by EtOAc (3\*20 ml). Combined organic layer was dried over anhydrous  $\text{Na}_2\text{SO}_4$  and evaporated after addition of silica gel. Crude product was purified by column chromatography using PE/EtOAc as an eluent to give pyrrolo[1,2-b]indazoles **7**.

### **[2-(4-Chlorophenyl)-1-fluoro-5-methyl-5H-pyrrolo[1,2-b]indazol-3-yl](phenyl)methanone** **7a**

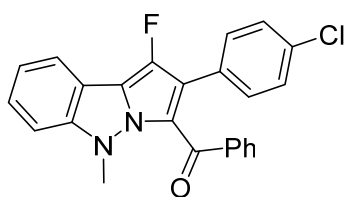

Pyrrolo[1,2-b]indazole **7a** was obtained from  $\alpha$ -fluoronitroalkene **1a** (20 mg, 0.1 mmol) and indazolium salt **6a** (2.5 equiv.) following the general procedure 3. Column chromatography (eluent: 19:1 to 7:1 PE/EtOAc) afforded **7a** (28 mg, 70%) as a bright yellow solid.

$R_f = 0.53$  (PE/EtOAc, 3:1) (UV), mp = 178-179°C ( $\text{CHCl}_3$ )

$^1\text{H NMR}$  (300 MHz,  $\text{CDCl}_3$ ):  $\delta$  3.75 (s, 3H, N-Me), 7.02 (s, 4H,  $\text{CH}_{\text{Ar}}$ ), 7.10 (t,  $J = 7.7$  Hz, 2H), 7.26-7.35 (m, 3H,  $\text{CH}_{\text{Ar}}$ ), 7.44-7.50 (m, 1H,  $\text{CH}_{\text{Ar}}$ ), 7.51-7.56 (m, 2H,  $\text{CH}_{\text{Ar}}$ ), 7.84 (d,  $J = 7.7$  Hz, 1H).

$^{13}\text{C}$  NMR (75 MHz,  $\text{CDCl}_3$ ):  $\delta$  41.8 (N-Me), 111.5 (CH), 115.6 (C3), 116.8 (d,  $^3J_{\text{CF}} = 2.9$  Hz, C9a), 119.3 (d,  $^2J_{\text{CF}} = 9.4$  Hz, C2), 120.4 (C9-H), 121.2 (d,  $^2J_{\text{CF}} = 28.5$  Hz, C9b), 123.4 (CH), 127.6 (CH), 127.7 ( $\text{CH}_{\text{Ar}}$ ), 127.8 ( $\text{CH}_{\text{Ar}}$ ), 129.6 ( $\text{CH}_{\text{Ar}}$ ), 129.7 (d,  $^3J_{\text{CF}} = 2.3$  Hz,  $\text{C}_{\text{Ar}}$ ), 131.6 ( $\text{CH}_{\text{Ar}}$ ), 131.9 (d,  $^4J_{\text{CF}} = 0.7$  Hz,  $\text{CH}_{\text{Ar}}$ ), 132.8 ( $\text{C}_{\text{Ar}}\text{-Cl}$ ), 137.5 (d,  $^1J_{\text{CF}} = 242.8$  Hz, C1-F), 138.8 ( $\text{C}_{\text{Ph}}$ ), 149.0 (C5a), 183.8 (d,  $^4J_{\text{CF}} = 2.4$  Hz,  $\text{C=O}$ ).

$^{19}\text{F}$  NMR (282 MHz,  $\text{CDCl}_3$ ):  $\delta$  -172.4 (s).

HRMS (ESI):  $m/z$  calcd. for  $[\text{C}_{24}\text{H}_{16}\text{ClFN}_2\text{O} + \text{H}^+]$ : 403.1008, found: 403.0998.

**[2-(2-Chlorophenyl)-1-fluoro-5-methyl-5H-pyrrolo[1,2-b]indazol-3-yl](phenyl)methanone**  
**7b**

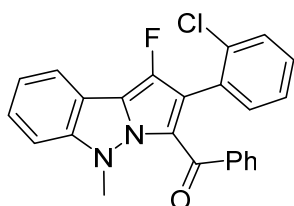

Pyrrolo[1,2-b]indazole **7b** was obtained from  $\alpha$ -fluoronitroalkene **1b** (20 mg, 0.1 mmol) and indazolium salt **6a** (2.5 equiv.) following the general procedure 3. Column chromatography (eluent: 19:1 to 7:1 PE/EtOAc) afforded **7b** (33 mg, 82%) as a bright yellow solid

$R_f = 0.40$  (PE/EtOAc, 3:1) (UV), mp = 176-177°C ( $\text{CHCl}_3$ )

$^1\text{H}$  NMR (300 MHz,  $\text{CDCl}_3$ ):  $\delta$  3.80 (s, 3H, N-Me), 6.85-6.92 (m, 1H,  $\text{CH}_{\text{Ar}}$ ), 6.96-7.11 (m, 4H,  $\text{CH}_{\text{Ar}}$ ), 7.15-7.22 (m, 2H,  $\text{CH}_{\text{Ar}}$ ), 7.29-7.33 (m, 1H,  $\text{CH}_{\text{Ar}}$ ), 7.35 (d,  $J = 8.3$  Hz, 1H,  $\text{CH}_{\text{Ar}}$ ), 7.48 (ddd,  $J = 8.3, 7.3, 1.2$  Hz, 1H,  $\text{CH}_{\text{Ar}}$ ), 7.53-7.56 (m, 2H,  $\text{CH}_{\text{Ar}}$ ), 7.85 (d,  $J = 7.7$  Hz, 1H,  $\text{CH}_{\text{Ar}}$ ).

$^{13}\text{C}$  NMR (75 MHz,  $\text{CDCl}_3$ ):  $\delta$  41.3 (N-Me), 111.2 (CH), 115.7 (d,  $^3J_{\text{CF}} = 0.9$  Hz, C3), 116.8 (d,  $^3J_{\text{CF}} = 2.9$  Hz, C9a), 117.3 (d,  $^2J_{\text{CF}} = 10.8$  Hz, C2), 120.4 (C9-H), 121.1 (d,  $^2J_{\text{CF}} = 28.6$  Hz, C9b), 123.3 (CH), 125.8 (CH), 127.3 (CH), 127.6 (CH), 128.8 (CH), 128.9 (CH), 129.1 (CH), 130.8 (d,  $^3J_{\text{CF}} = 2.3$  Hz,  $\text{C}_{\text{Ar}}$ ), 131.3 (CH), 133.5 (CH), 134.5 ( $\text{C}_{\text{Ar}}\text{-Cl}$ ), 137.8 (d,  $^1J_{\text{CF}} = 243.5$  Hz, C1-F), 139.0 ( $\text{C}_{\text{Ph}}$ ), 148.7 (C5a), 183.7 (d,  $^4J_{\text{CF}} = 2.5$  Hz,  $\text{C=O}$ ).

$^{19}\text{F}$  NMR (282 MHz,  $\text{CDCl}_3$ ):  $\delta$  -167.9 (s).

HRMS (ESI):  $m/z$  calcd. for  $[\text{C}_{24}\text{H}_{16}\text{ClFN}_2\text{O} + \text{H}^+]$ : 403.1008, found: 403.1006.

**[1-Fluoro-2-(4-methoxyphenyl)-5-methyl-5H-pyrrolo[1,2-b]indazol-3-yl](phenyl)methanone**  
**7c**

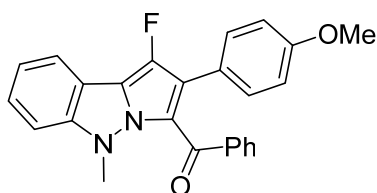

Pyrrolo[1,2-b]indazole **7c** was obtained from  $\alpha$ -fluoronitroalkene **1c** (20 mg, 0.1 mmol) and indazolium salt **6a** (3.0 equiv.) following the general procedure 3 (reaction time 3 days). Column chromatography (eluent: 19:1 to 5:1 PE/EtOAc) afforded **7c** (26.5 mg, 67%) as a bright yellow solid.

$R_f = 0.29$  (PE/EtOAc, 3:1) (UV), mp = 173-176°C (CHCl<sub>3</sub>)

<sup>1</sup>H NMR (300 MHz, CDCl<sub>3</sub>):  $\delta$  3.71 (s, 3H, OMe), 3.75 (s, 3H, N-Me), 6.60 (d,  $J = 8.7$  Hz, 2H, CH<sub>Ar</sub>), 7.01 (d,  $J = 8.4$  Hz, 2H, CH<sub>Ar</sub>), 7.08 (t,  $J = 7.3$  Hz, 2H, CH<sub>Ar</sub>), 7.20-7.35 (m, 3H, CH<sub>Ar</sub>), 7.42-7.49 (m, 1H, CH<sub>Ar</sub>), 7.54 (d,  $J = 7.3$  Hz, 2H, CH<sub>Ar</sub>), 7.83 (d,  $J = 7.7$  Hz, 1H, CH<sub>Ar</sub>).

<sup>13</sup>C NMR (75 MHz, CDCl<sub>3</sub>):  $\delta$  41.9 (N-Me), 55.1 (OMe), 111.5 (CH), 113.2 (CH<sub>Ar</sub>), 115.7 (C3), 117.1 (d,  $^3J_{CF} = 3.0$  Hz, C9a), 120.3 (d,  $^4J_{CF} = 0.7$  Hz, C9-H), 120.5 (d,  $^2J_{CF} = 9.6$  Hz, C2), 121.2 (d,  $^2J_{CF} = 28.8$  Hz, C9b), 123.3 (CH), 123.5 (d,  $^3J_{CF} = 2.3$  Hz, C<sub>Ar</sub>), 127.4 (CH), 127.5 (CH<sub>Ar</sub>), 129.6 (CH<sub>Ar</sub>), 131.3 (CH<sub>Ar</sub>), 131.8 (br s, CH<sub>Ar</sub>), 137.7 (d,  $^1J_{CF} = 241.4$  Hz, C1-F), 138.9 (C<sub>Ph</sub>), 149.2 (C5a), 158.4 (C<sub>Ar</sub>-OMe), 184.0 (d,  $^4J_{CF} = 2.4$  Hz, C=O).

<sup>19</sup>F NMR (282 MHz, CDCl<sub>3</sub>):  $\delta$  -172.4 (s).

HRMS (ESI):  $m/z$  calcd. for [C<sub>25</sub>H<sub>19</sub>FN<sub>2</sub>O<sub>3</sub> + H<sup>+</sup>]: 399.1503, found: 399.1494.

**Ethyl 2-(4-chlorophenyl)-1-fluoro-5-methyl-5H-pyrrolo[1,2-b]indazole-3-carboxylate 7d**

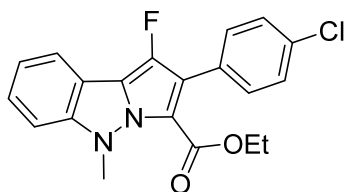

Pyrrolo[1,2-b]indazole **7d** was obtained from  $\alpha$ -fluoronitroalkene **1a** (20 mg, 0.1 mmol) and indazolium salt **6b** (3.0 equiv.) following the general procedure 3 (reaction time 3 days). Column chromatography (eluent: 19:1 to 7:1 PE/EtOAc) afforded **7b** (22 mg, 59%) as a white solid

$R_f = 0.50$  (PE/EtOAc, 3:1) (UV), mp = 108-110°C (CHCl<sub>3</sub>)

<sup>1</sup>H NMR (300 MHz, CDCl<sub>3</sub>):  $\delta$  1.10 (t,  $J = 7.1$  Hz, 3H, CH<sub>3</sub>), 3.76 (s, 3H, N-Me), 4.18 (q,  $J = 7.1$  Hz, 1H, CH<sub>2</sub>), 7.26-7.33 (m, 2H, CH<sub>Ar</sub>), 7.36-7.45 (m, 5H, CH<sub>Ar</sub>), 7.76 (d,  $J = 7.7$  Hz, 1H, CH<sub>Ar</sub>).

$^{13}\text{C}$  NMR (75 MHz,  $\text{CDCl}_3$ ):  $\delta$  13.9 ( $\text{CH}_3$ ), 43.6 (N-Me), 60.2 ( $\text{CH}_2$ ), 107.6 (d,  $^3J_{\text{CF}} = 1.3$  Hz, C3), 112.3 (CH), 117.8 (d,  $^4J_{\text{CF}} = 2.9$  Hz, C9a), 119.1 (d,  $^2J_{\text{CF}} = 9.9$  Hz, C2), 120.1 (d,  $^4J_{\text{CF}} = 1.1$  Hz, C9-H), 120.6 (d,  $^2J_{\text{CF}} = 28.1$  Hz, C9b), 123.7 (CH), 127.1 (CH), 127.7 ( $\text{CH}_{\text{Ar}}$ ), 130.1 (d,  $^3J_{\text{CF}} = 2.3$  Hz,  $\text{C}_{\text{Ar}}$ ), 132.1 (d,  $^4J_{\text{CF}} = 1.0$  Hz,  $\text{CH}_{\text{Ar}}$ ), 133.2 ( $\text{C}_{\text{Ar}}\text{-Cl}$ ), 137.6 (d,  $^1J_{\text{CF}} = 241.4$  Hz, C1-F), 150.3 (C5a-NMe), 159.9 (d,  $^4J_{\text{CF}} = 2.3$  Hz,  $\text{CO}_2\text{Et}$ ).

$^{19}\text{F}$  NMR (282 MHz,  $\text{CDCl}_3$ ):  $\delta$  -173.0 (s).

HRMS (ESI):  $m/z$  calcd. for  $[\text{C}_{20}\text{H}_{16}\text{ClFN}_2\text{O}_2 + \text{H}^+]$ : 371.0957, found: 371.0951.

### Ethyl 3-benzoyl-2-(4-chlorophenyl)-5-methyl-5H-pyrrolo[1,2-b]indazole-1-carboxylate **7e**

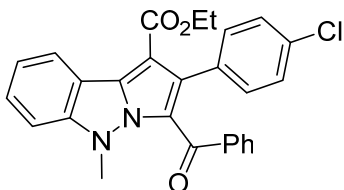

Pyrrolo[1,2-b]indazole **7e** was obtained from  $\alpha$ -fluoronitroalkene **1e** (25.5 mg, 0.1 mmol) and indazolium salt **6a** (2.5 equiv.) following the general procedure 3. Column chromatography (eluent: 19:1 to 5:1 PE/EtOAc) afforded **7e** (28.5 mg, 62%) as a slightly yellow solid.

$R_f = 0.39$  (PE/EtOAc, 3:1) (UV), mp = 189-191°C ( $\text{CHCl}_3$ )

$^1\text{H}$  NMR (300 MHz,  $\text{CDCl}_3$ ):  $\delta$  1.21 (t,  $J = 7.1$  Hz, 3H,  $\text{CH}_3$ ), 3.73 (s, 3H, N-Me), 4.26 (q,  $J = 7.1$  Hz, 2H,  $\text{CH}_2$ ), 6.97 (d,  $J = 8.3$  Hz, 2H,  $\text{CH}_{\text{Ar}}$ ), 7.04 (d,  $J = 8.3$  Hz, 2H,  $\text{CH}_{\text{Ar}}$ ), 7.11 (t,  $J = 7.7$  Hz, 2H,  $\text{CH}_{\text{Ar}}$ ), 7.27-7.42 (m, 3H,  $\text{CH}_{\text{Ar}}$ ), 7.48-7.52 (m, 2H,  $\text{CH}_{\text{Ar}}$ ), 7.53-7.60 (m, 1H,  $\text{CH}_{\text{Ar}}$ ), 8.57 (d,  $J = 7.9$  Hz, 1H,  $\text{CH}_{\text{Ar}}$ ).

$^{13}\text{C}$  NMR (75 MHz,  $\text{CDCl}_3$ ):  $\delta$  14.3 ( $\text{CH}_3$ ), 40.3 (N-Me), 59.9 ( $\text{CH}_2$ ), 102.0 (C1), 110.6 (CH), 117.2 ( $\text{C}_q$ ), 122.9 (CH), 123.9 (CH), 126.9 ( $\text{CH}_{\text{Ar}}$ ), 127.7 ( $\text{CH}_{\text{Ar}}$ ), 128.6 (CH), 128.7 ( $\text{C}_q$ ), 129.4 ( $\text{CH}_{\text{Ar}}$ ), 131.8 ( $\text{CH}_{\text{Ar}}$ ), 132.5 ( $\text{CH}_{\text{Ar}}$ ), 132.7 ( $\text{C}_q$ ), 132.9 ( $\text{C}_q$ ), 135.2 ( $\text{C}_q$ ), 135.6 ( $\text{C}_q$ ), 138.5 ( $\text{C}_{\text{Ph}}$ ), 148.9 (C5a), 164.1 ( $\text{CO}_2\text{Et}$ ), 185.6 (C=O).

HRMS (ESI):  $m/z$  calcd. for  $[\text{C}_{27}\text{H}_{21}\text{ClN}_2\text{O}_3 + \text{H}^+]$ : 457.1313, found: 457.1312.

### [2-(4-Chlorophenyl)-5-methyl-5H-pyrrolo[1,2-b]indazol-3-yl](phenyl)methanone **7f**

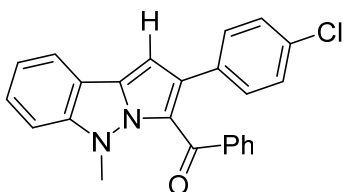

Pyrrolo[1,2-b]indazole **7f** was obtained from nitroalkene **1g** (18.4 mg, 0.1 mmol) and indazolium salt **6a** (2.5 equiv.) following the general procedure 3 using MeCN as a solvent. Column

chromatography (eluent: 19:1 to 9:1 PE/EtOAc) afforded **7f** (13.5 mg, 35%) as a slightly yellow solid

$R_f = 0.43$  (PE/EtOAc, 3:1) (UV), mp = 168-170°C (CHCl<sub>3</sub>)

<sup>1</sup>H NMR (300 MHz, CDCl<sub>3</sub>, COSY):  $\delta$  3.79 (s, 3H, N-Me), 6.50 (s, 1H, C1-H), 6.98-7.05 (m, 4H, CH<sub>Ar</sub>), 7.13 (t,  $J = 7.7$  Hz, 2H, CH<sub>Ar</sub>), 7.27-7.34 (m, 2H, CH<sub>Ar</sub>), 7.39 (d,  $J = 8.3$  Hz, 1H, CH<sub>Ar</sub>), 7.49 (ddd,  $J = 8.3, 7.2, 1.2$  Hz, 1H, CH<sub>Ar</sub>), 7.58 (dd,  $J = 8.2, 1.2$  Hz, 2H, CH<sub>Ar</sub>), 7.81 (d,  $J = 7.7$  Hz, 1H, CH<sub>Ar</sub>).

<sup>13</sup>C NMR (75 MHz, CDCl<sub>3</sub>, HSQC):  $\delta$  41.5 (N-Me), 97.2 (C1-H), 111.7 (CH), 118.1 (C<sub>q</sub>), 120.1 (C9-H), 123.0 (CH), 127.5 (CH), 127.59 (CH<sub>Ar</sub>), 127.63 (CH<sub>Ar</sub>), 129.7 (CH<sub>Ar</sub>), 131.1 (CH<sub>Ar</sub>), 131.5 (CH<sub>Ar</sub>), 132.3 (C<sub>Ar</sub>-Cl), 134.0 (C<sub>q</sub>), 135.1 (C<sub>q</sub>), 135.7 (C<sub>q</sub>), 139.3 (C<sub>Ph</sub>), 149.7 (C5a), 184.4 (C=O).

HRMS (ESI):  $m/z$  calcd. for [C<sub>24</sub>H<sub>17</sub>ClN<sub>2</sub>O + H<sup>+</sup>]: 385.1102, found: 385.1092.

## References

- s1 V. A. Motornov, V. M. Muzalevskiy, A. A. Tabolin, R. A. Novikov, Yu. V. Nelyubina, V. G. Nenajdenko, S. L. Ioffe, *J. Org. Chem.* 2017, **82**, 5274.
- s2 V. A. Motornov, A. A. Tabolin, Yu. V. Nelyubina, S. L. Ioffe, I. V. Smolyar, V. G. Nenajdenko, *Eur. J. Org. Chem.*, 2017, 6851.
- s3 J. Liu, L. Gong, E. Meggers, *Tetrahedron Lett.*, 2015, **56**, 4653.
- s4 A. A. Fadeeva, S. L. Ioffe, A. A. Tabolin, *Synthesis*, 2020, **52**, 2679.
- s5 Ji, X.; Tong, H.; Yuan, Y. *Synth. Commun.*, 2011, **47**, 372-379.
- s6 Kolarovic, A.; Kaslin, A.; Wennemers, H. *Org. Lett.*, 2014, **16**, 4236-4239.
- s7 A. J. Simpson, H. W. Lam, *Org. Lett.*, 2003, **15**, 2586-2589.
- s8 T. Ukai, R. Tanaka, T. Dokawa, *Yakugaki Zasshi*, 1943, **63**, 296. [*Chem. Abstr.* 1951, **45**, 5148].
- s9 M. T. Gandasegui, J. Alvarez-Builla, *Heterocycles*, 1990, **31**, 1801.

## Copies of NMR spectra

3-(2-oxo-2-phenylethyl)-1,3-thiazol-3-ium bromide **2a**

$^1\text{H}$  NMR

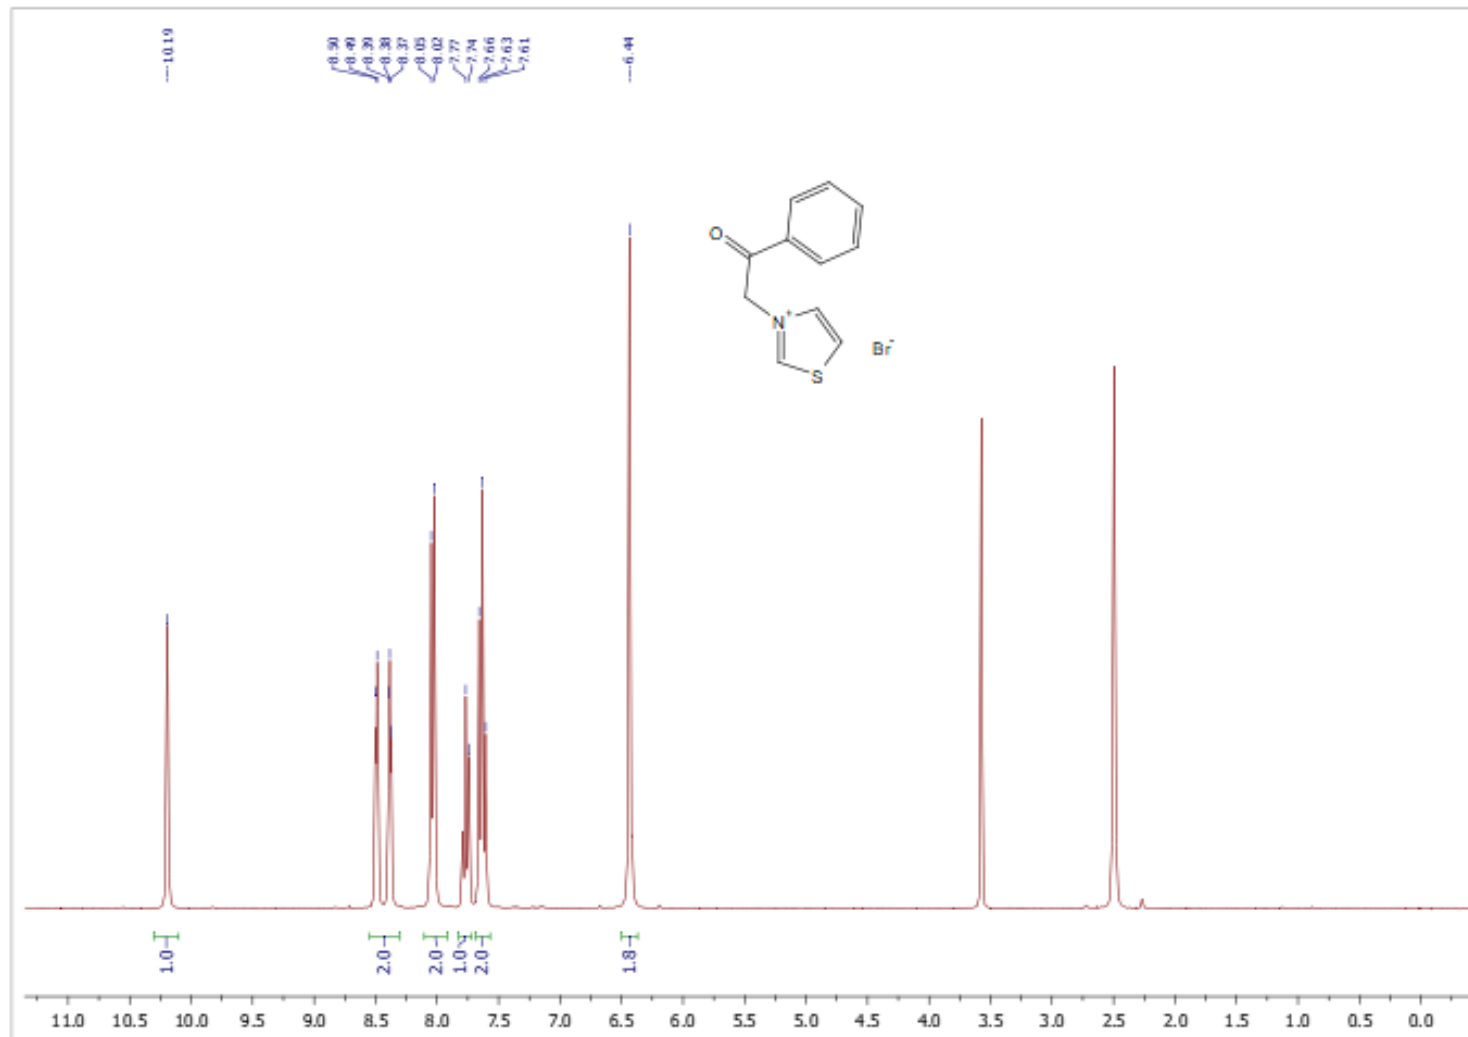

3-[2-(3-methoxyphenyl)-2-oxoethyl]-1,3-thiazol-3-ium bromide **2b**

$^1\text{H}$  NMR

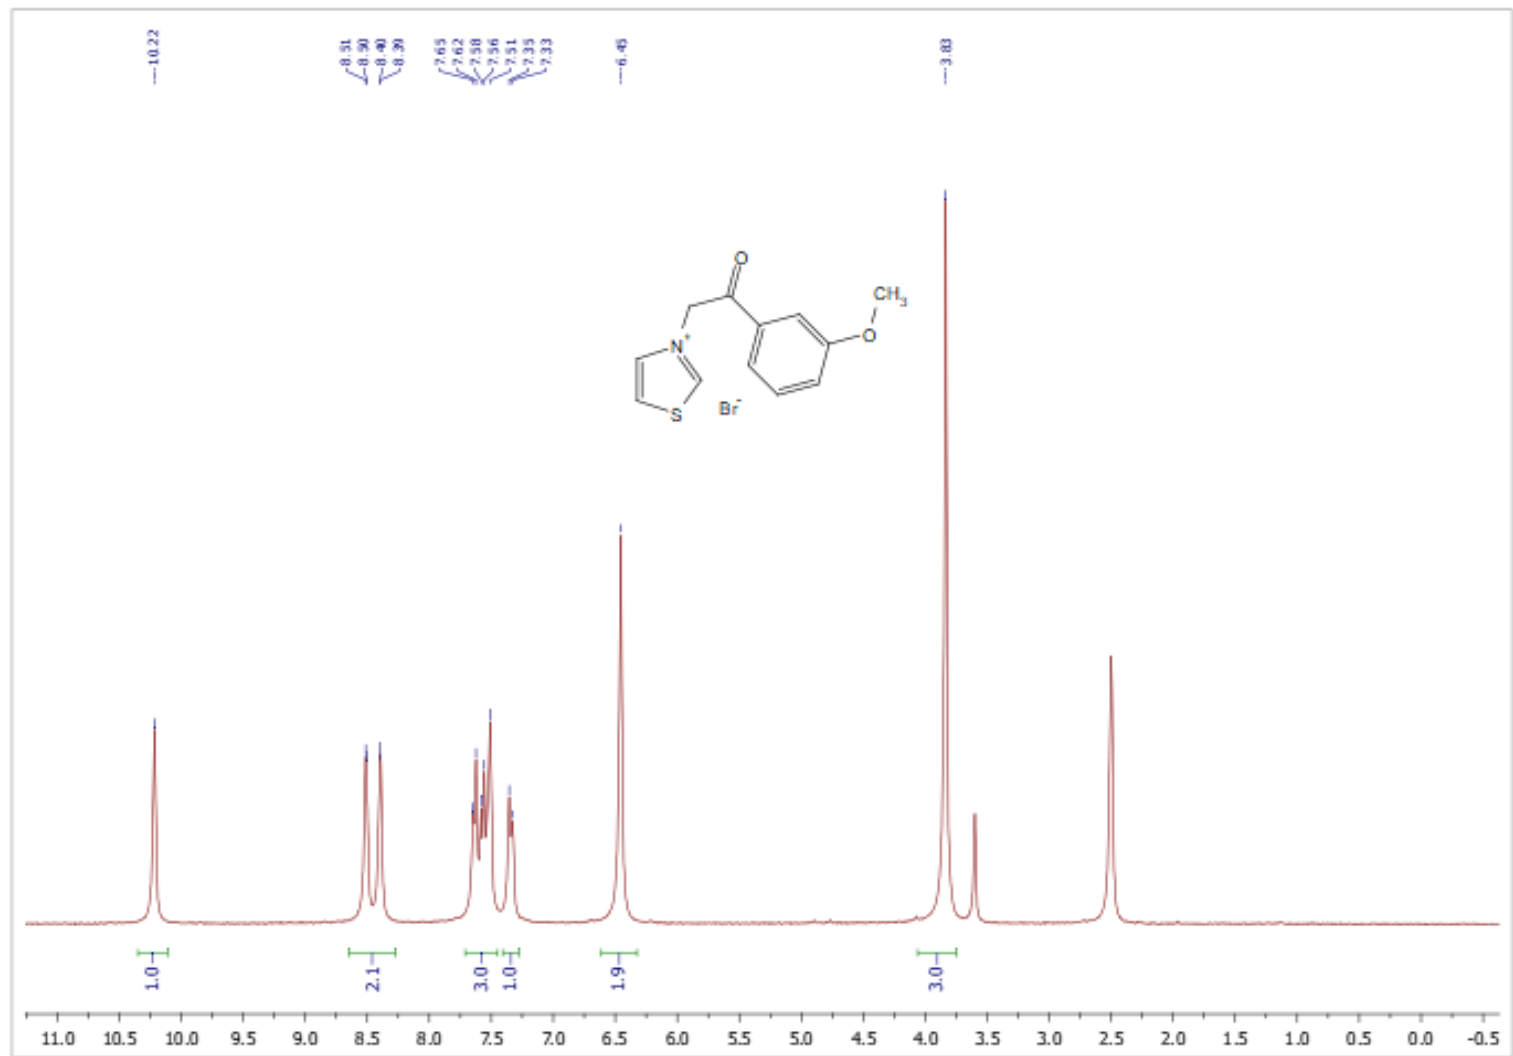

$^{13}\text{C}$  NMR

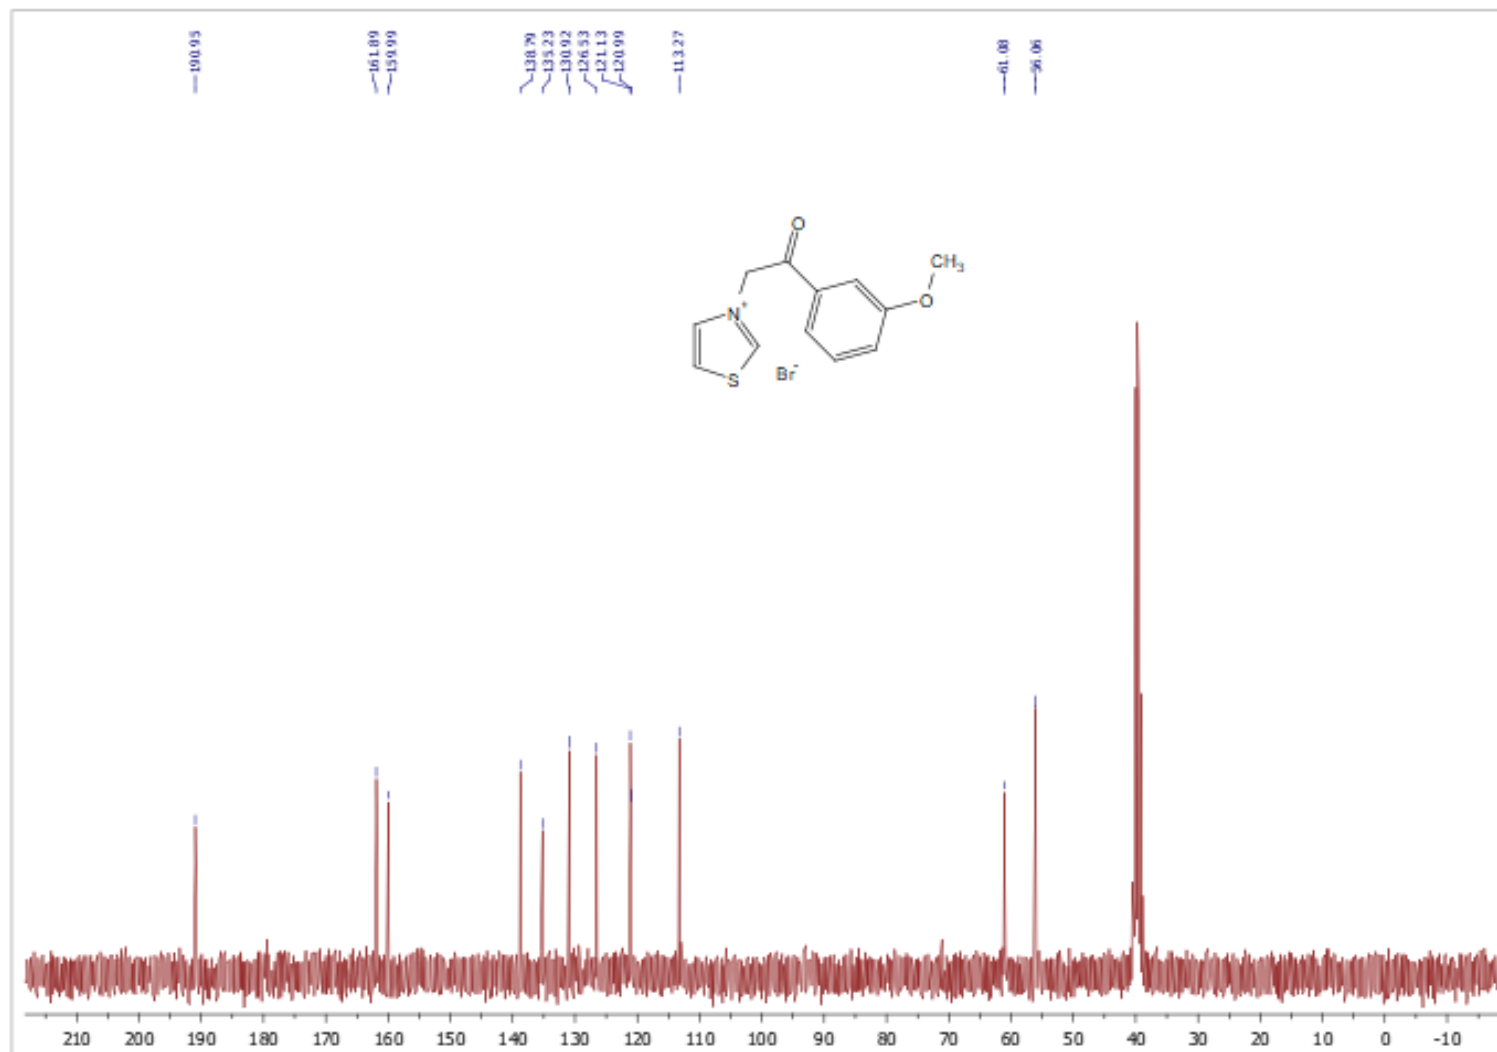



DEPT-135  $^{13}\text{C}$  NMR

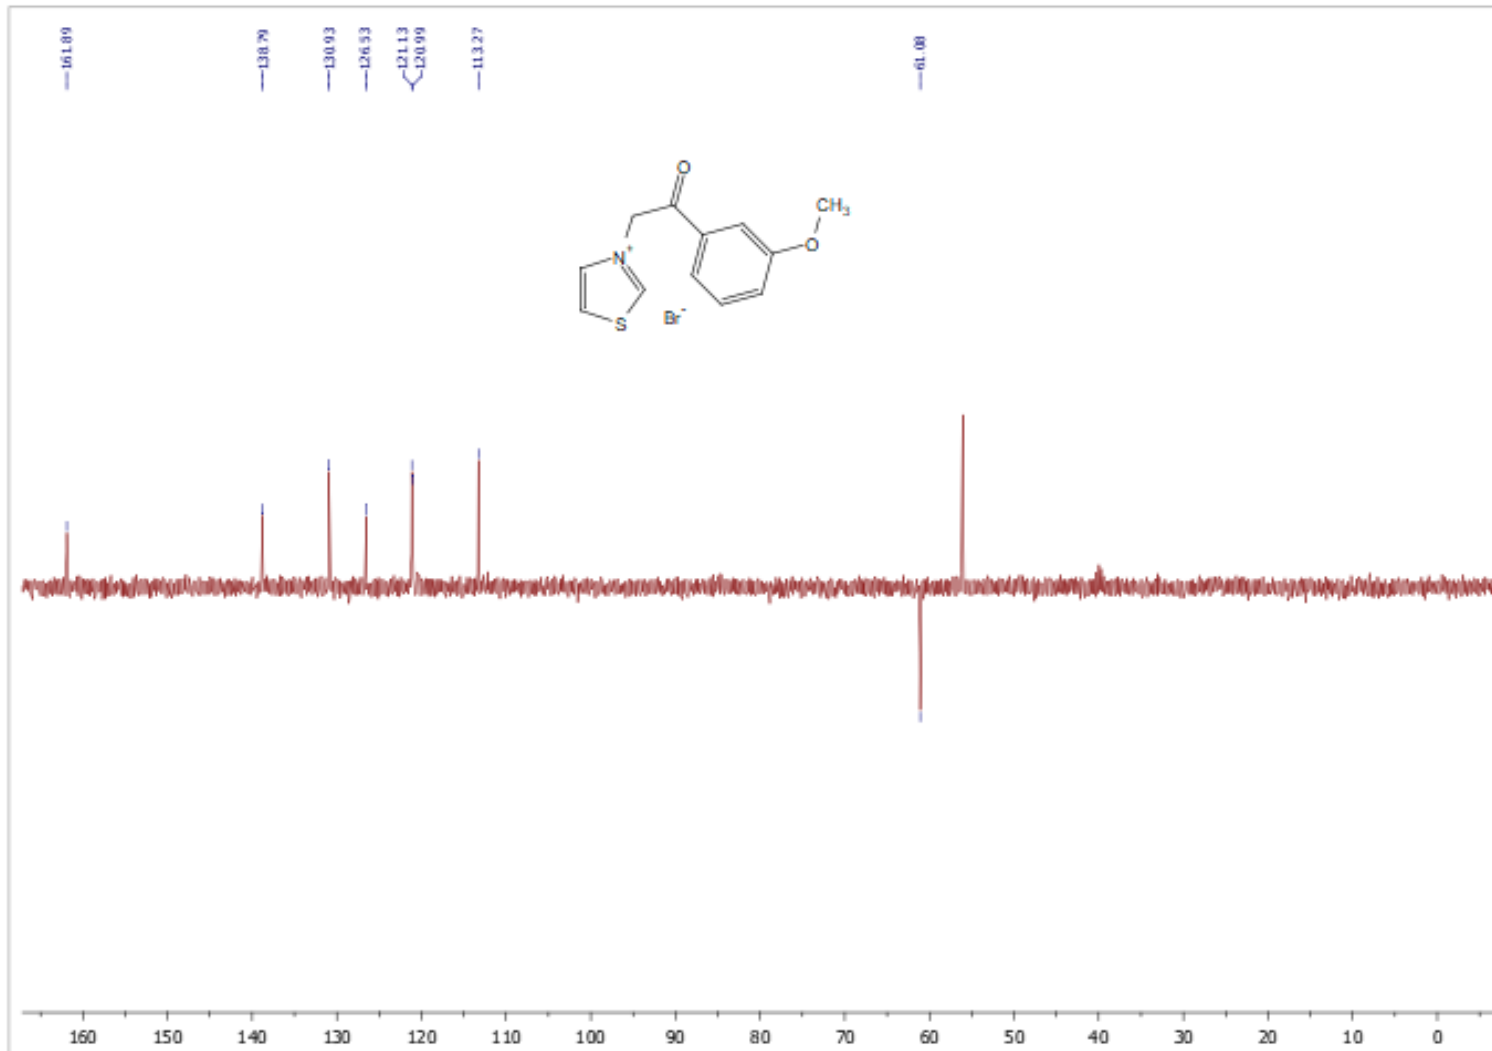

3-[2-(3-nitrophenyl)-2-oxoethyl]-1,3-thiazol-3-ium bromide **2c**

$^1\text{H}$  NMR

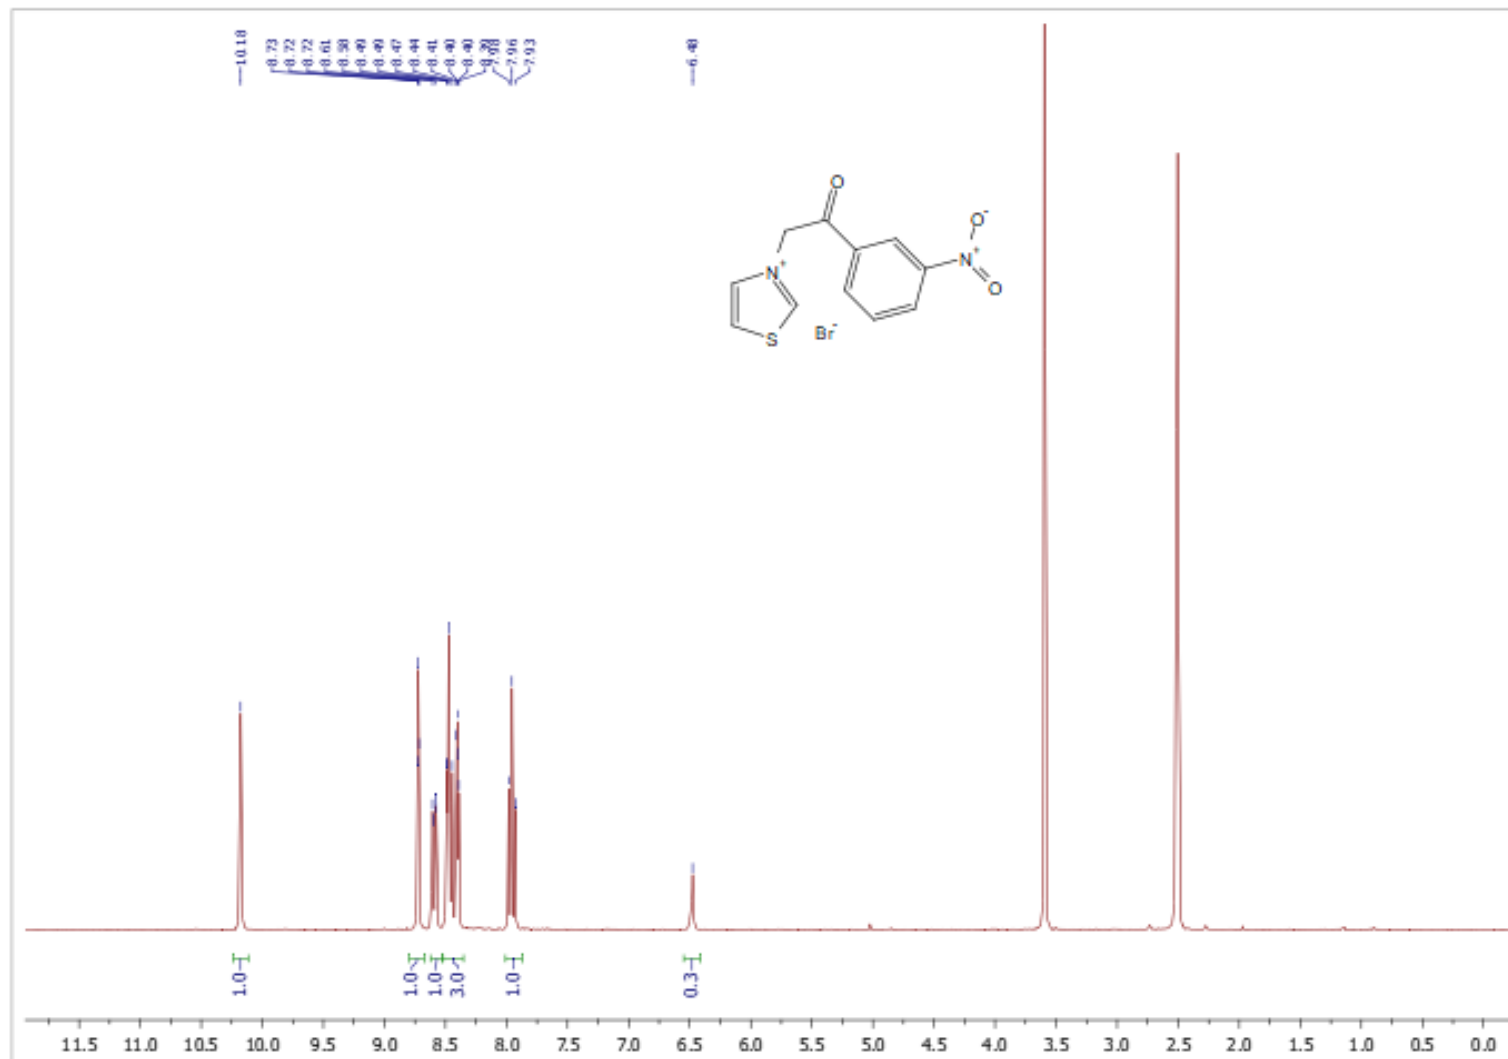

$^{13}\text{C}$  NMR

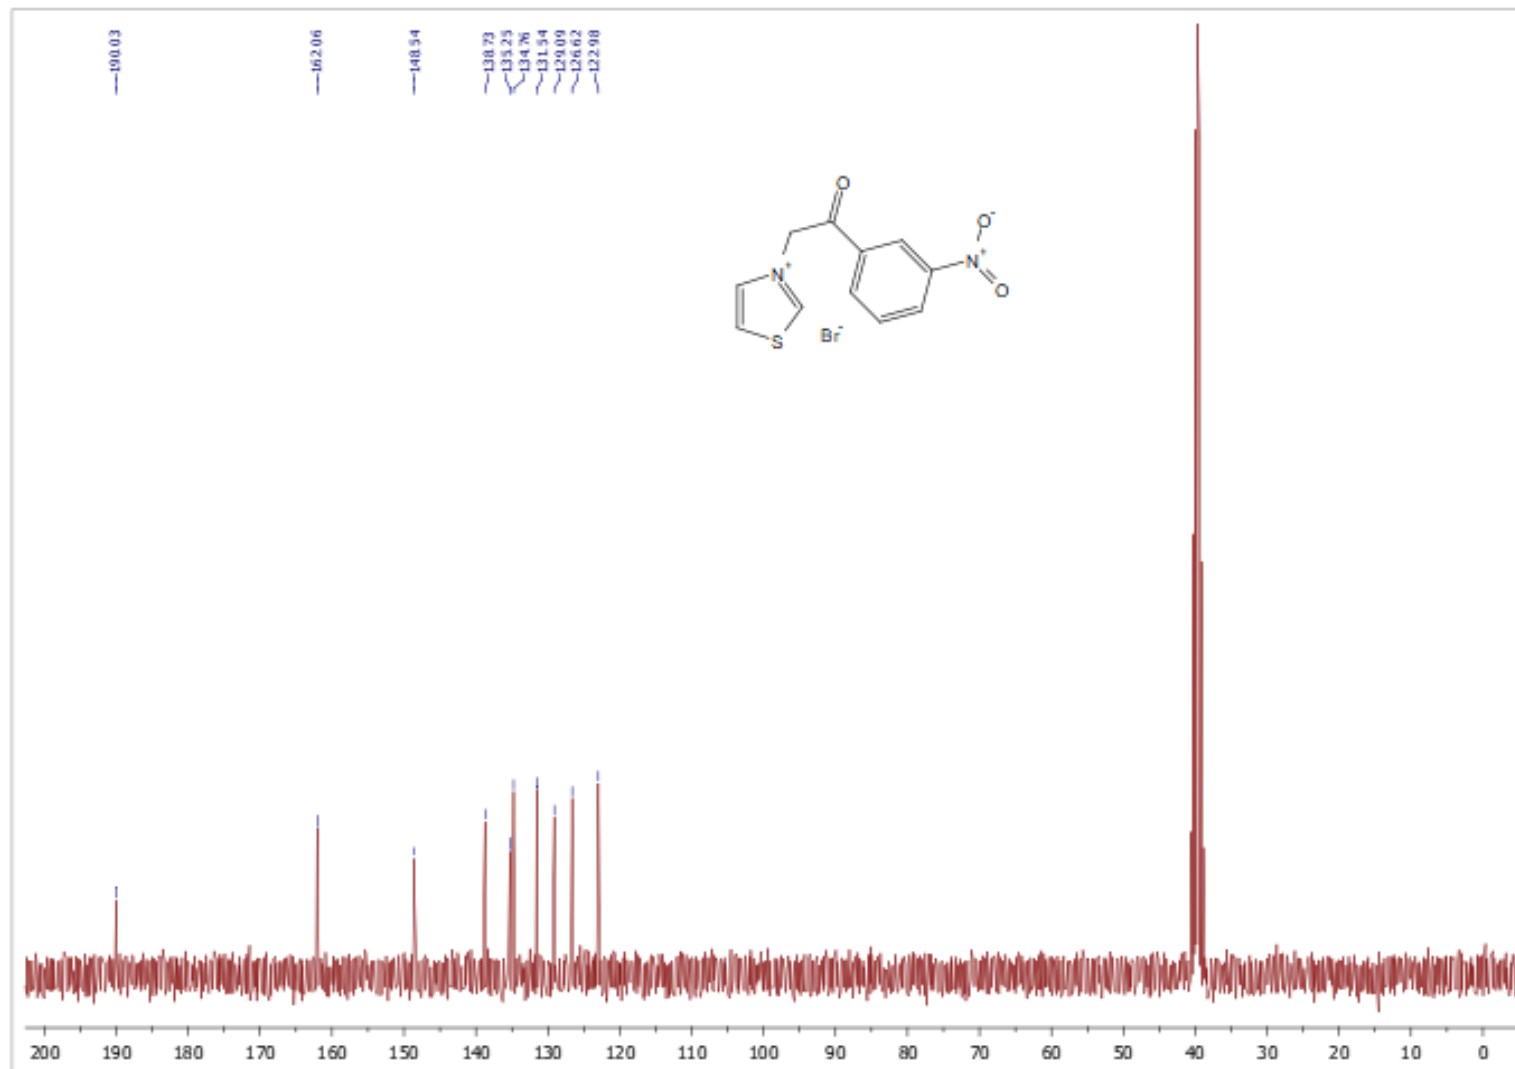

DEPT-135  $^{13}\text{C}$  NMR

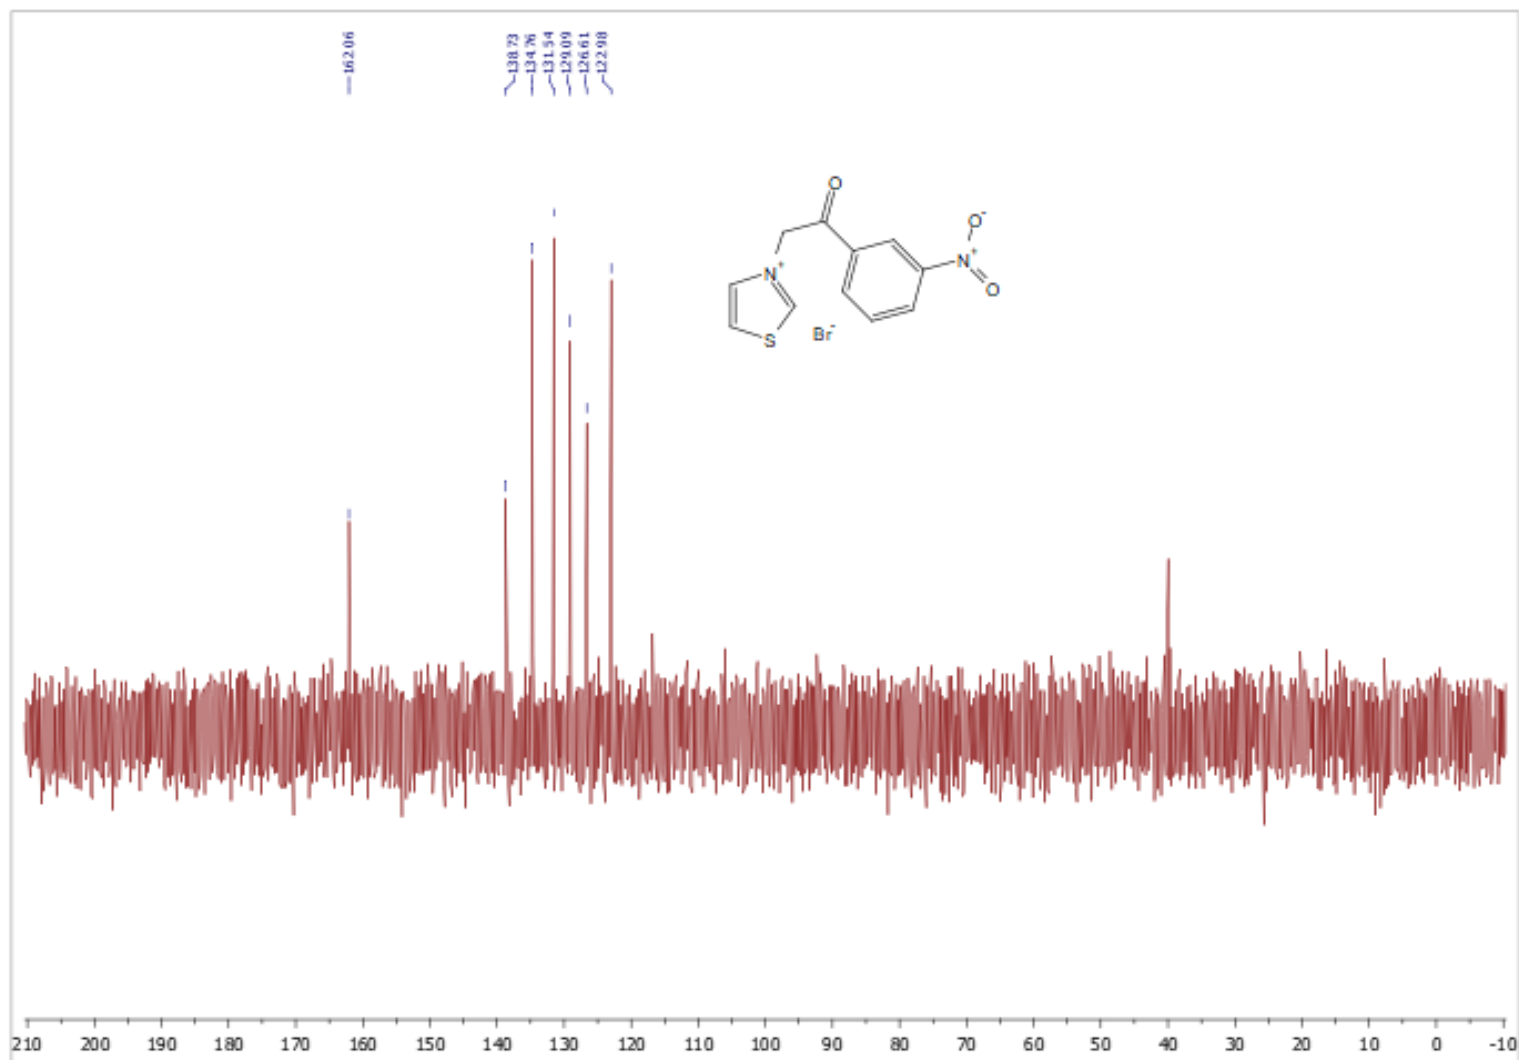

3-(2-ethoxy-2-oxoethyl)-1,3-thiazol-3-ium bromide **2d**

$^1\text{H}$  NMR

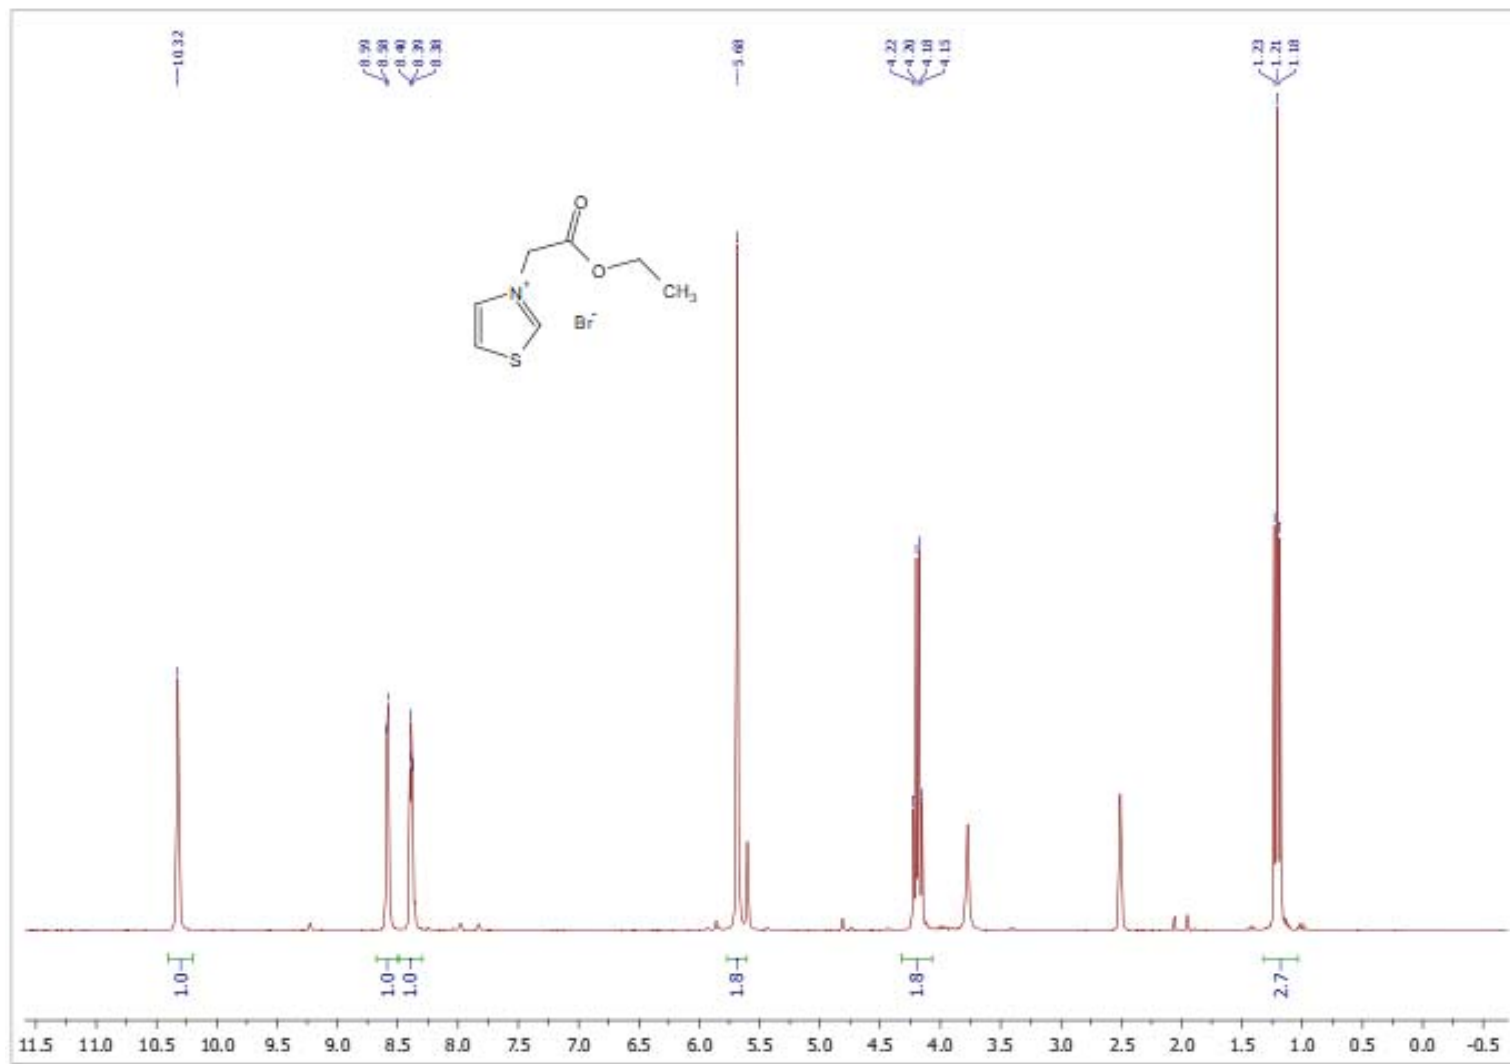

$^{13}\text{C}$  NMR

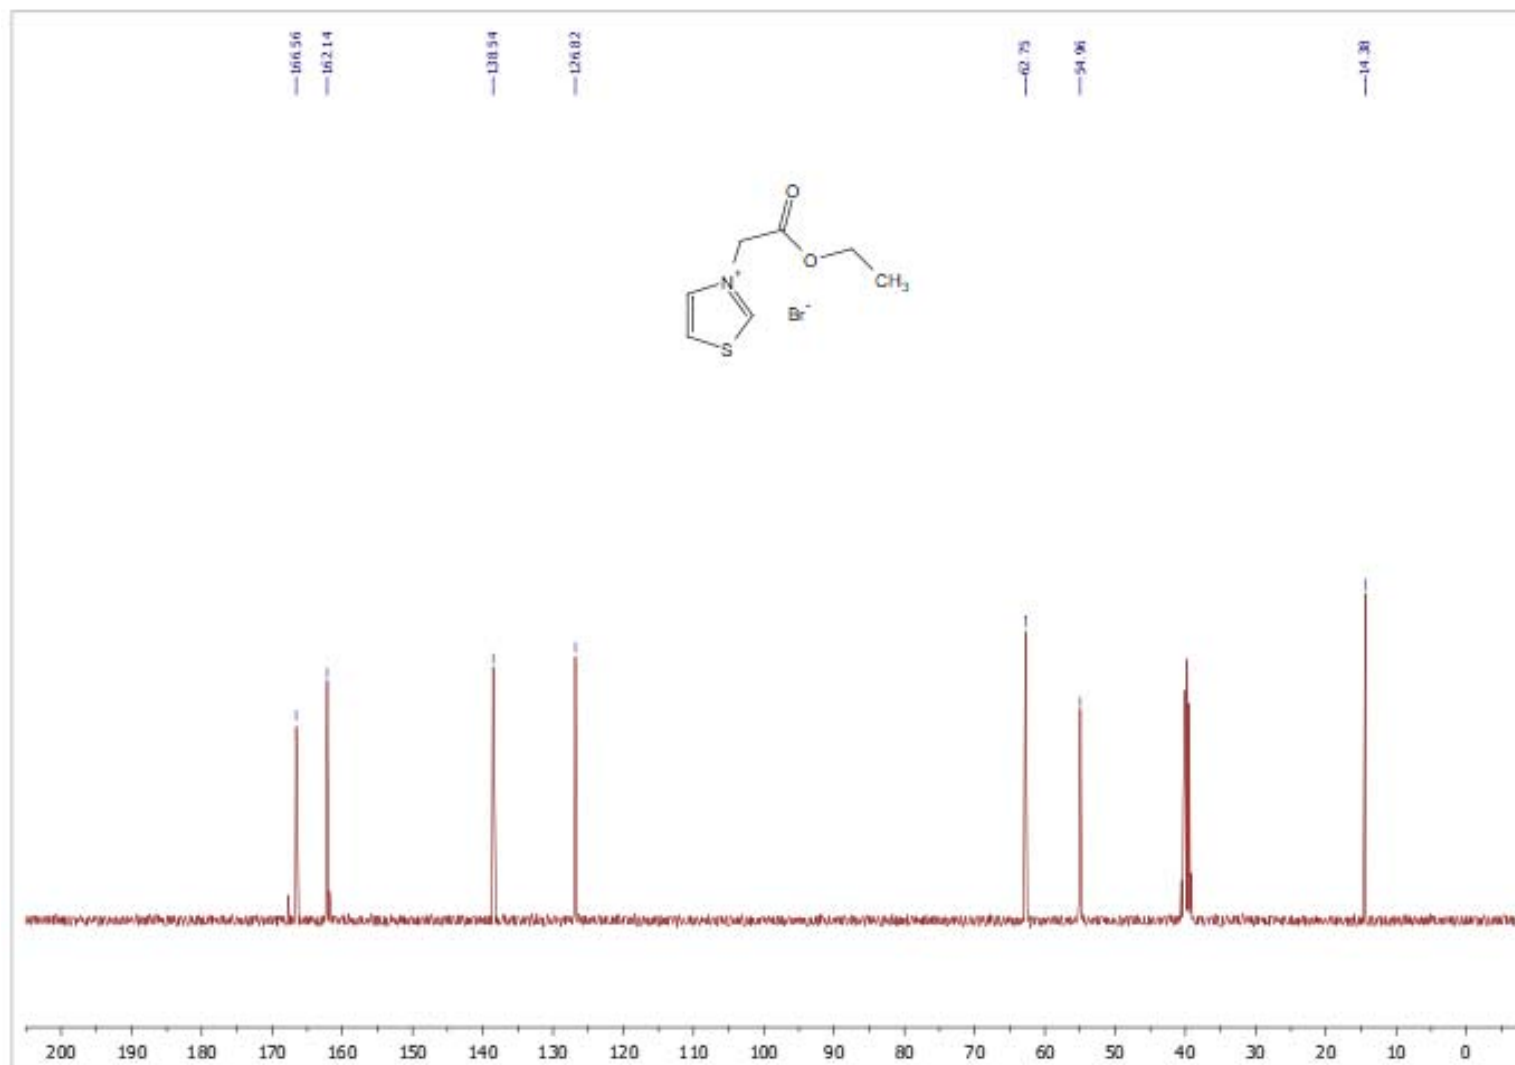

DEPT-135  $^{13}\text{C}$  NMR

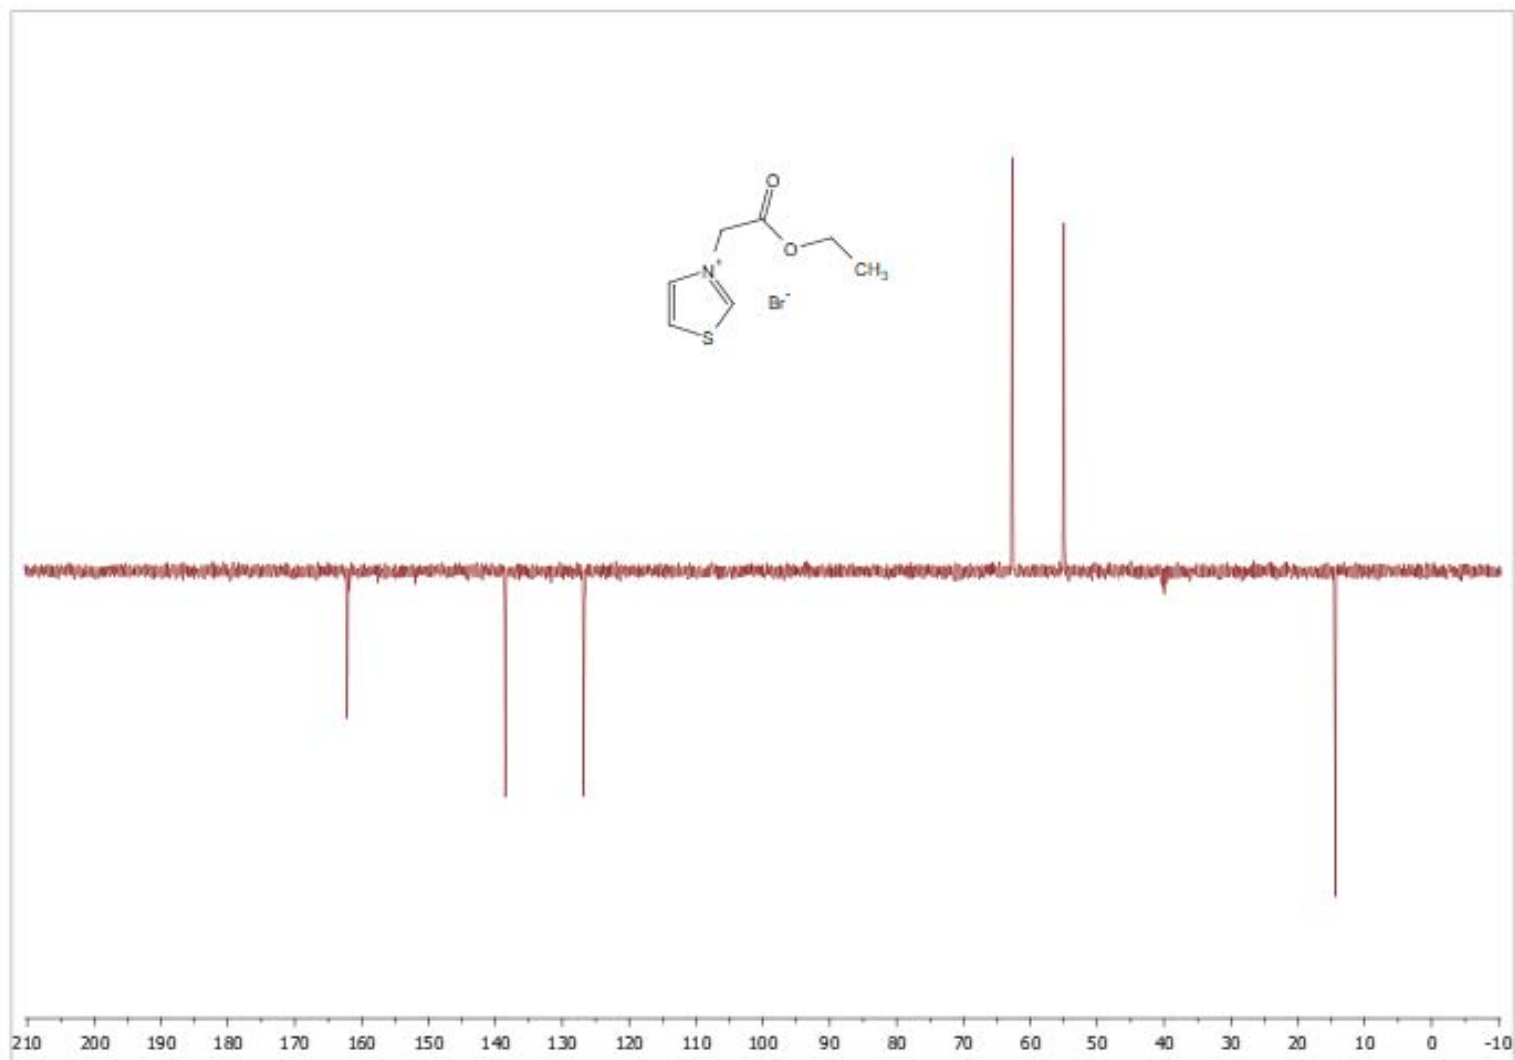

3-[2-(benzyloxy)-2-oxoethyl]-1,3-thiazol-3-ium bromide **2e**

$^1\text{H}$  NMR

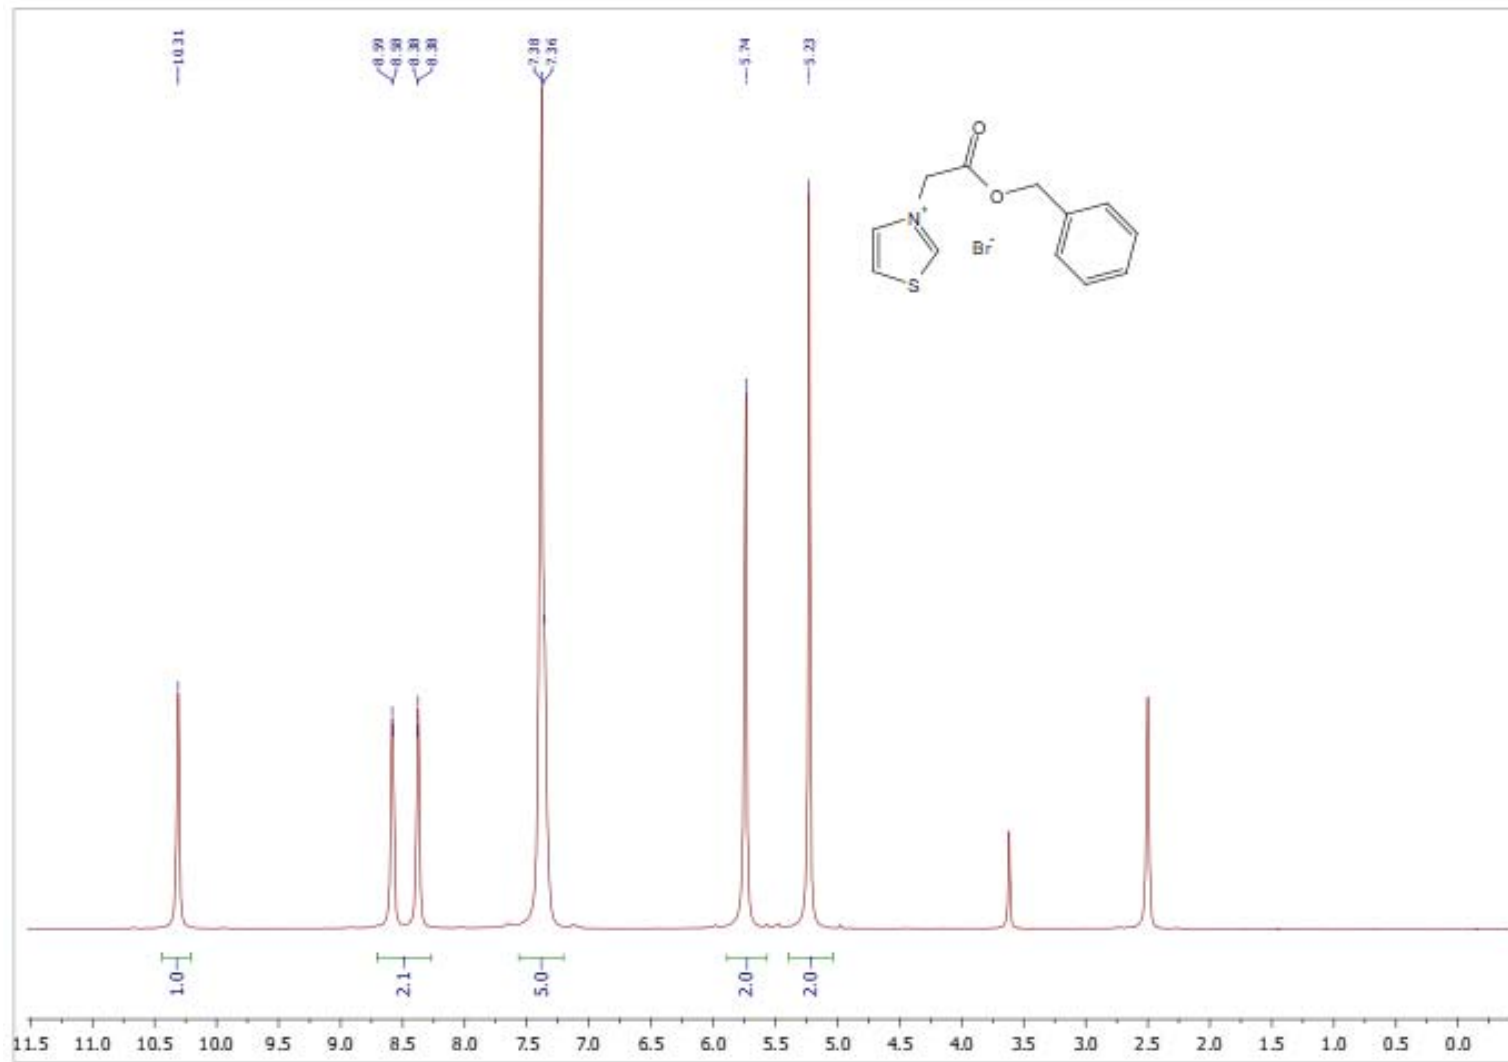



$^{13}\text{C}$  NMR

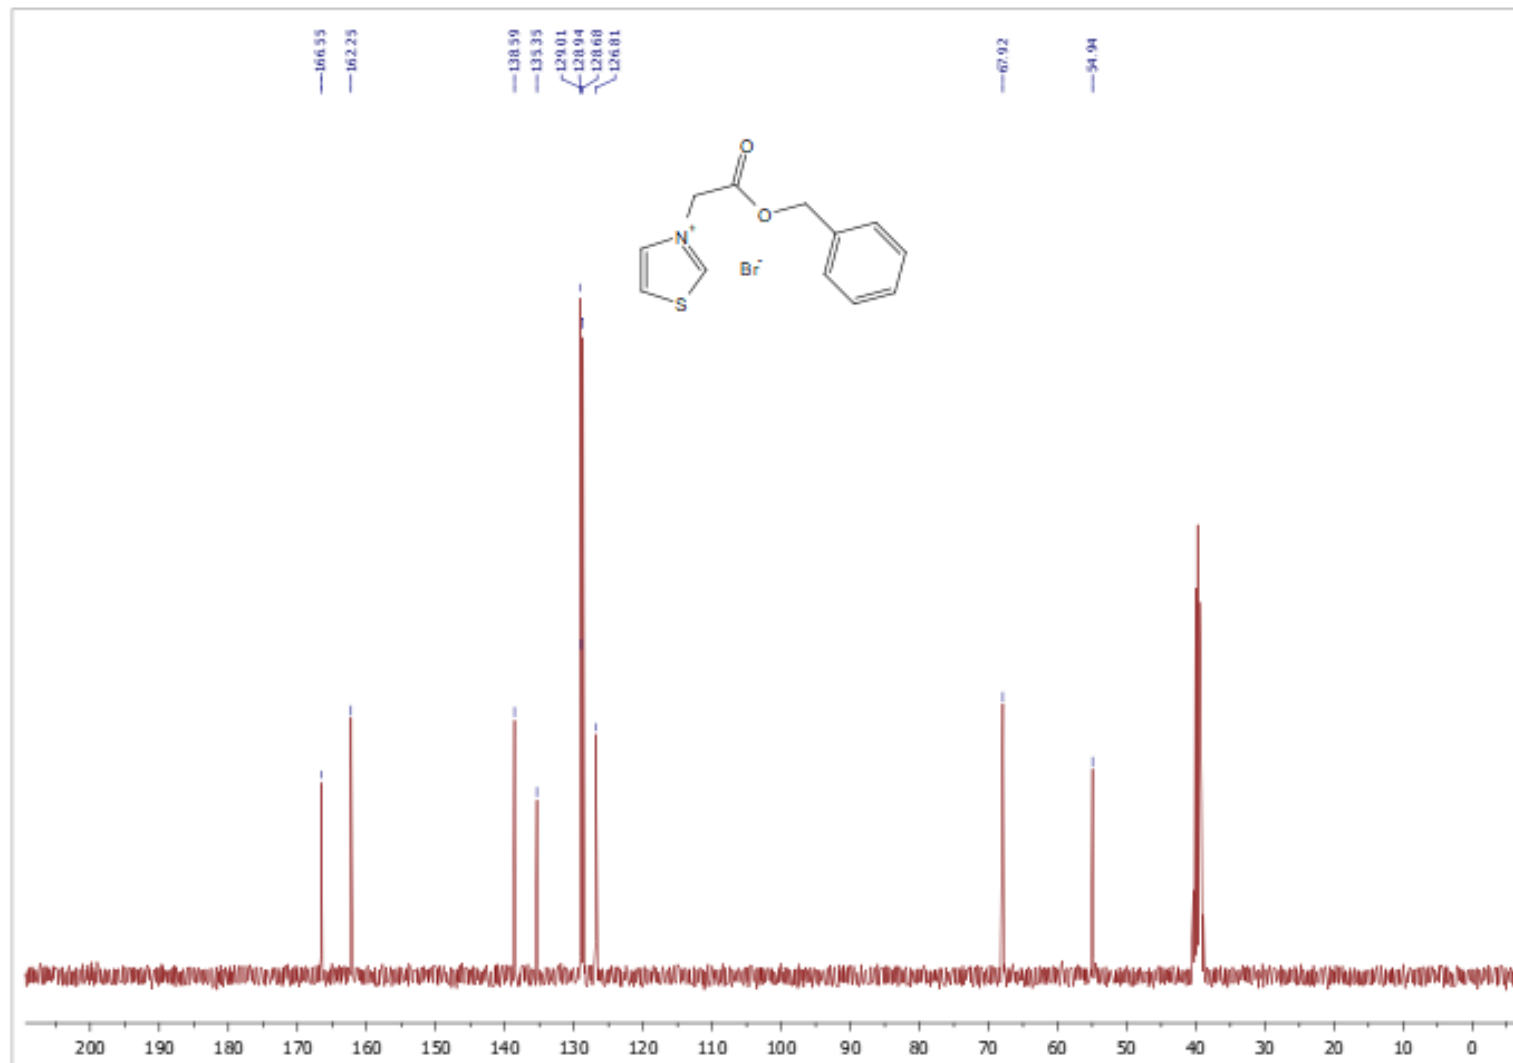

DEPT-135  $^{13}\text{C}$  NMR

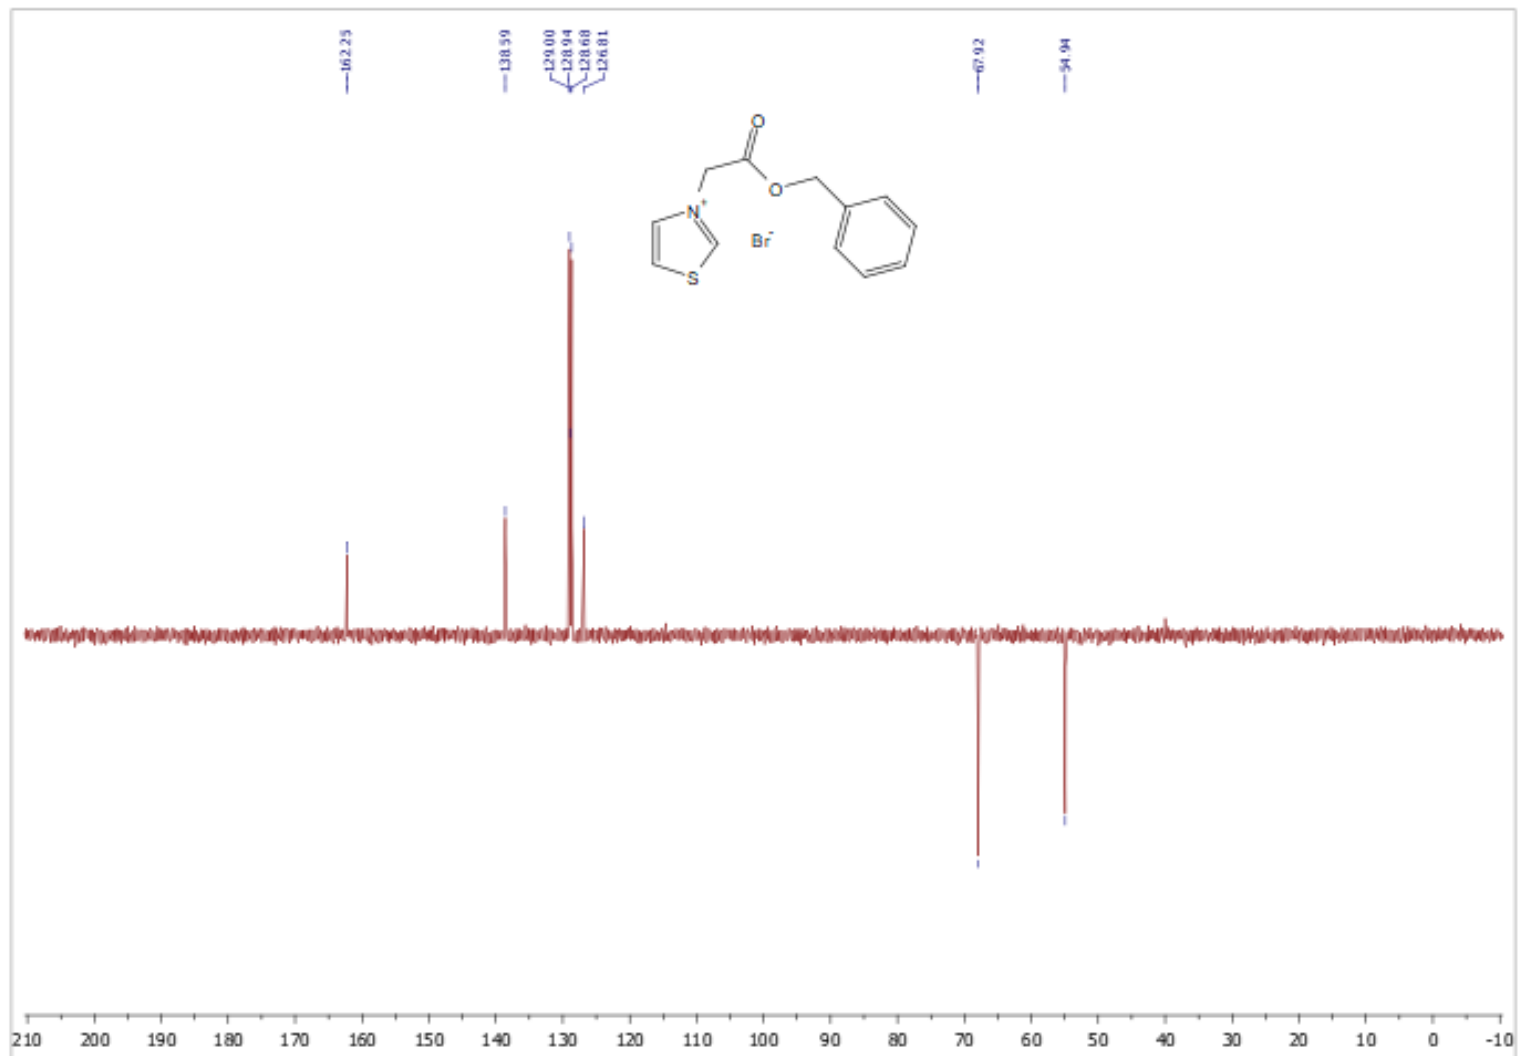

3-(2-oxopropyl)-1,3-thiazol-3-ium chloride **2f**

$^1\text{H}$  NMR

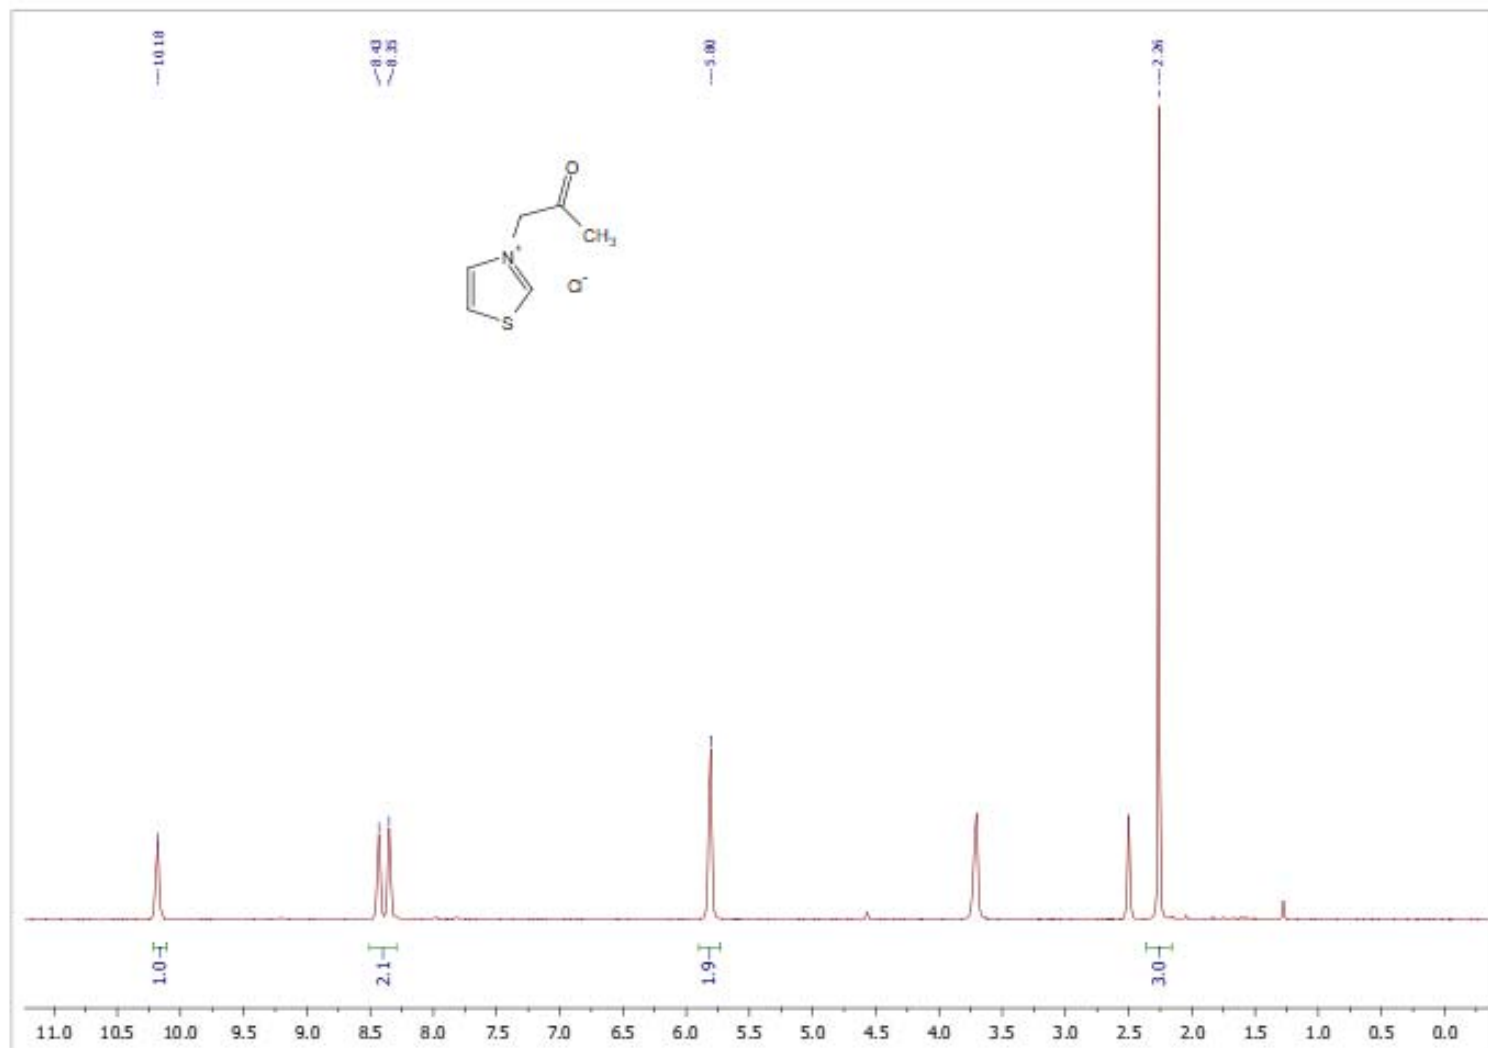

$^{13}\text{C}$  NMR

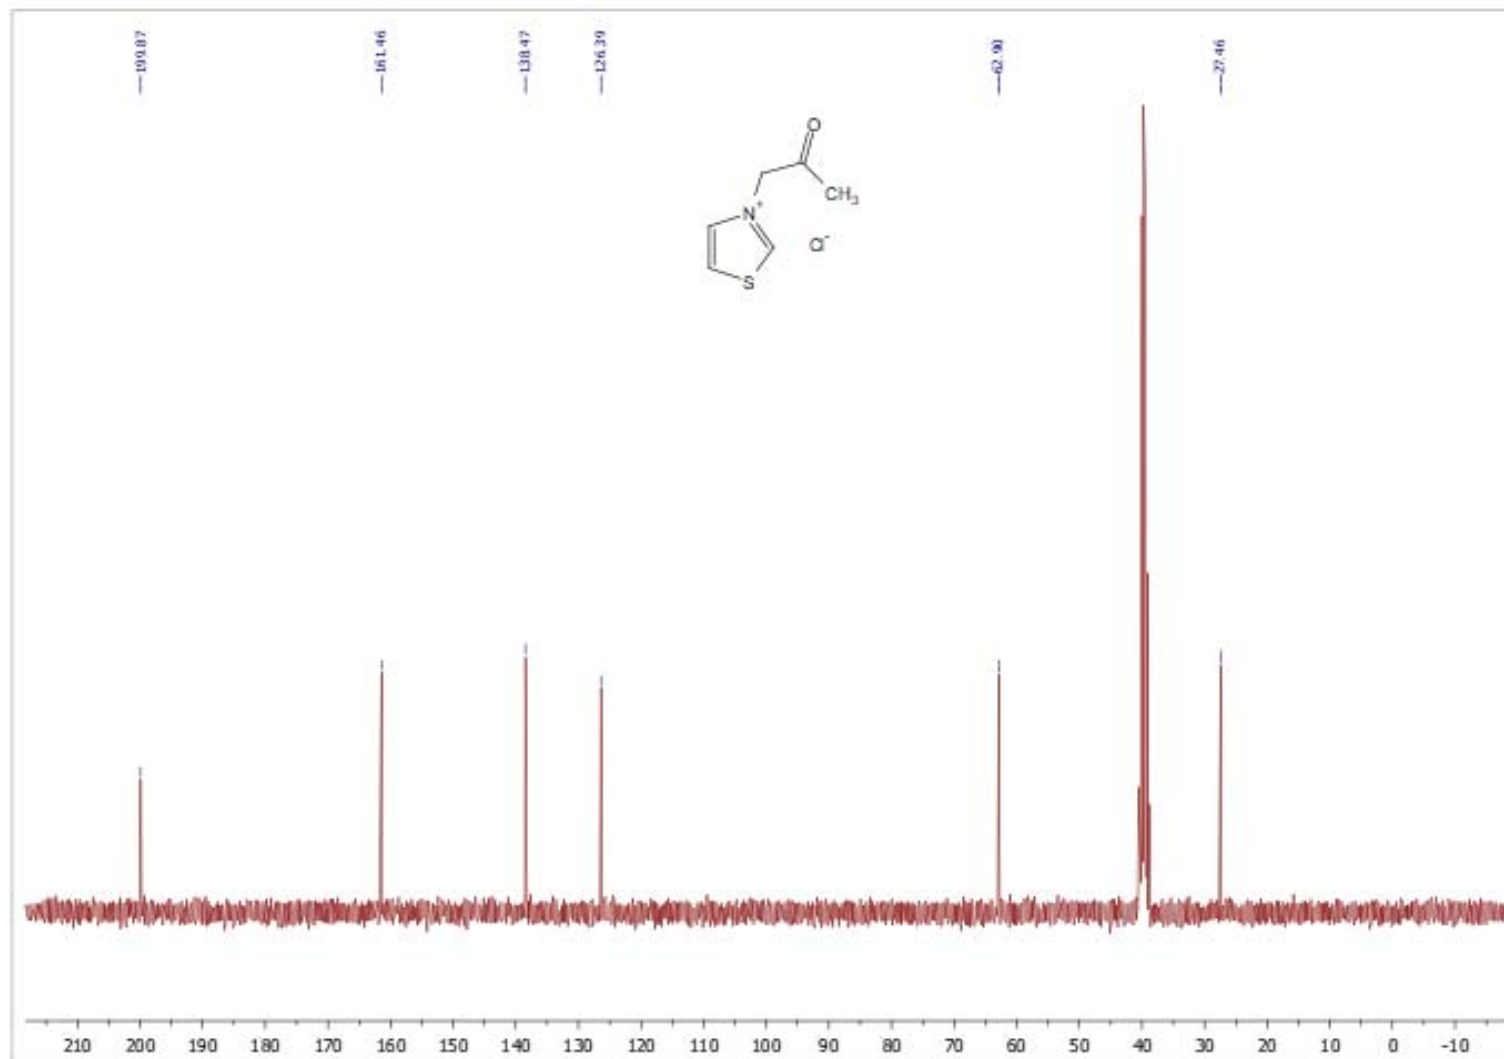

DEPT-135  $^{13}\text{C}$  NMR

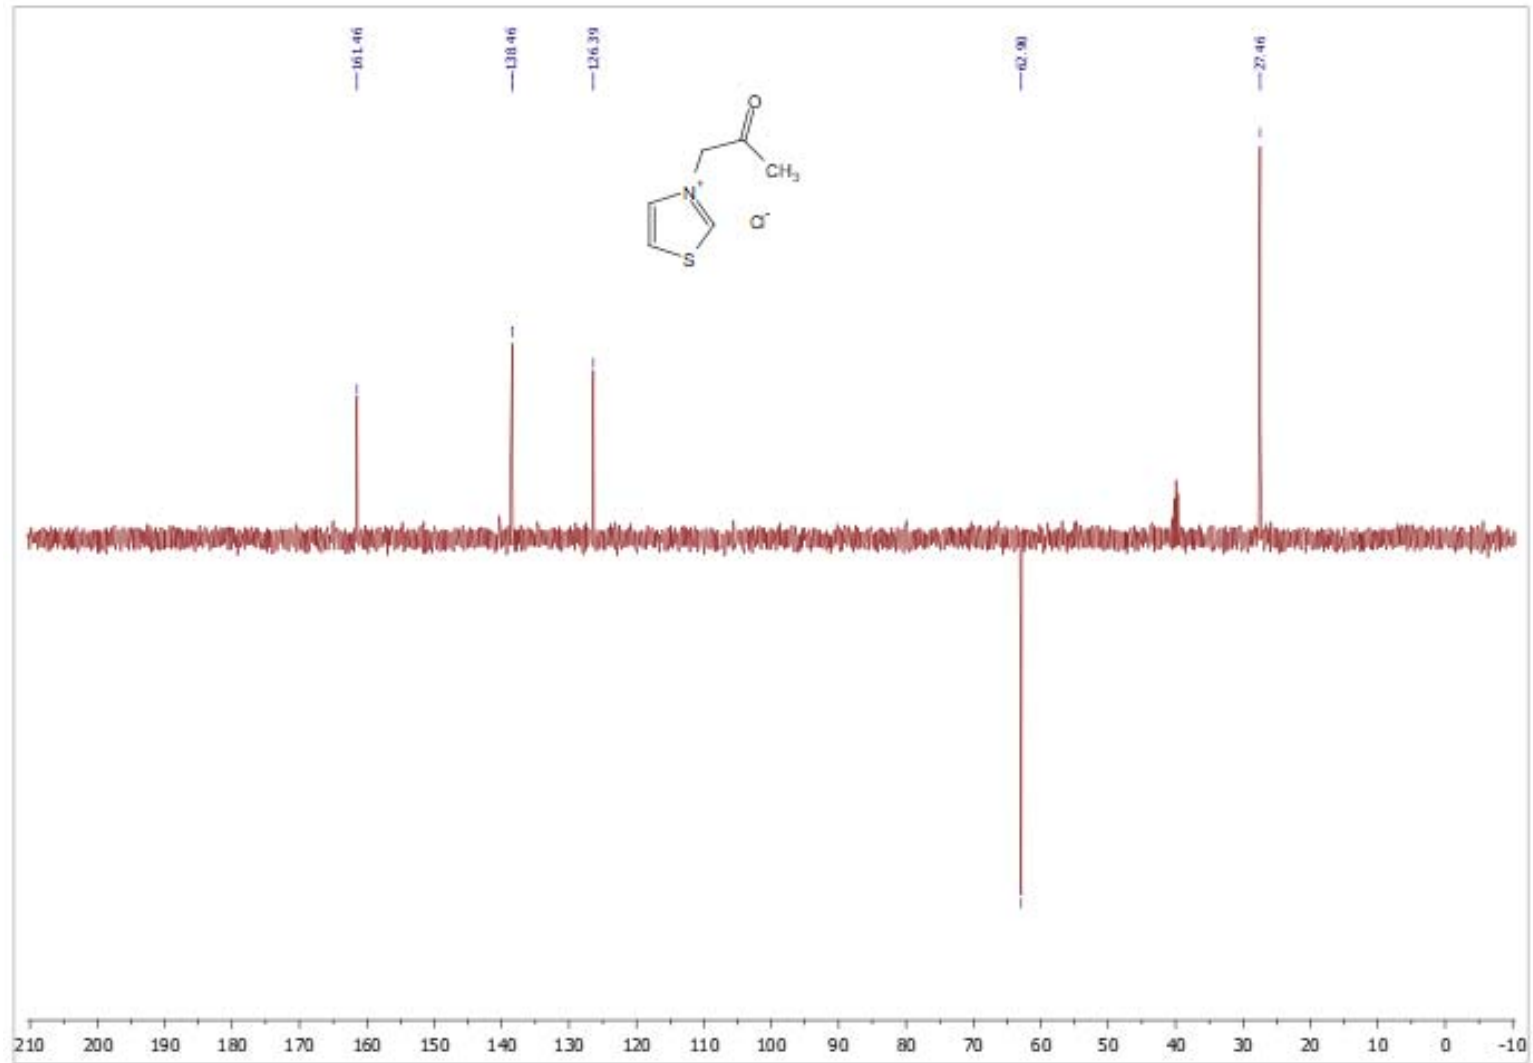

1-methyl-2-(2-oxo-2-phenylethyl)-1*H*-indazol-2-ium bromide **6a**

<sup>1</sup>H NMR

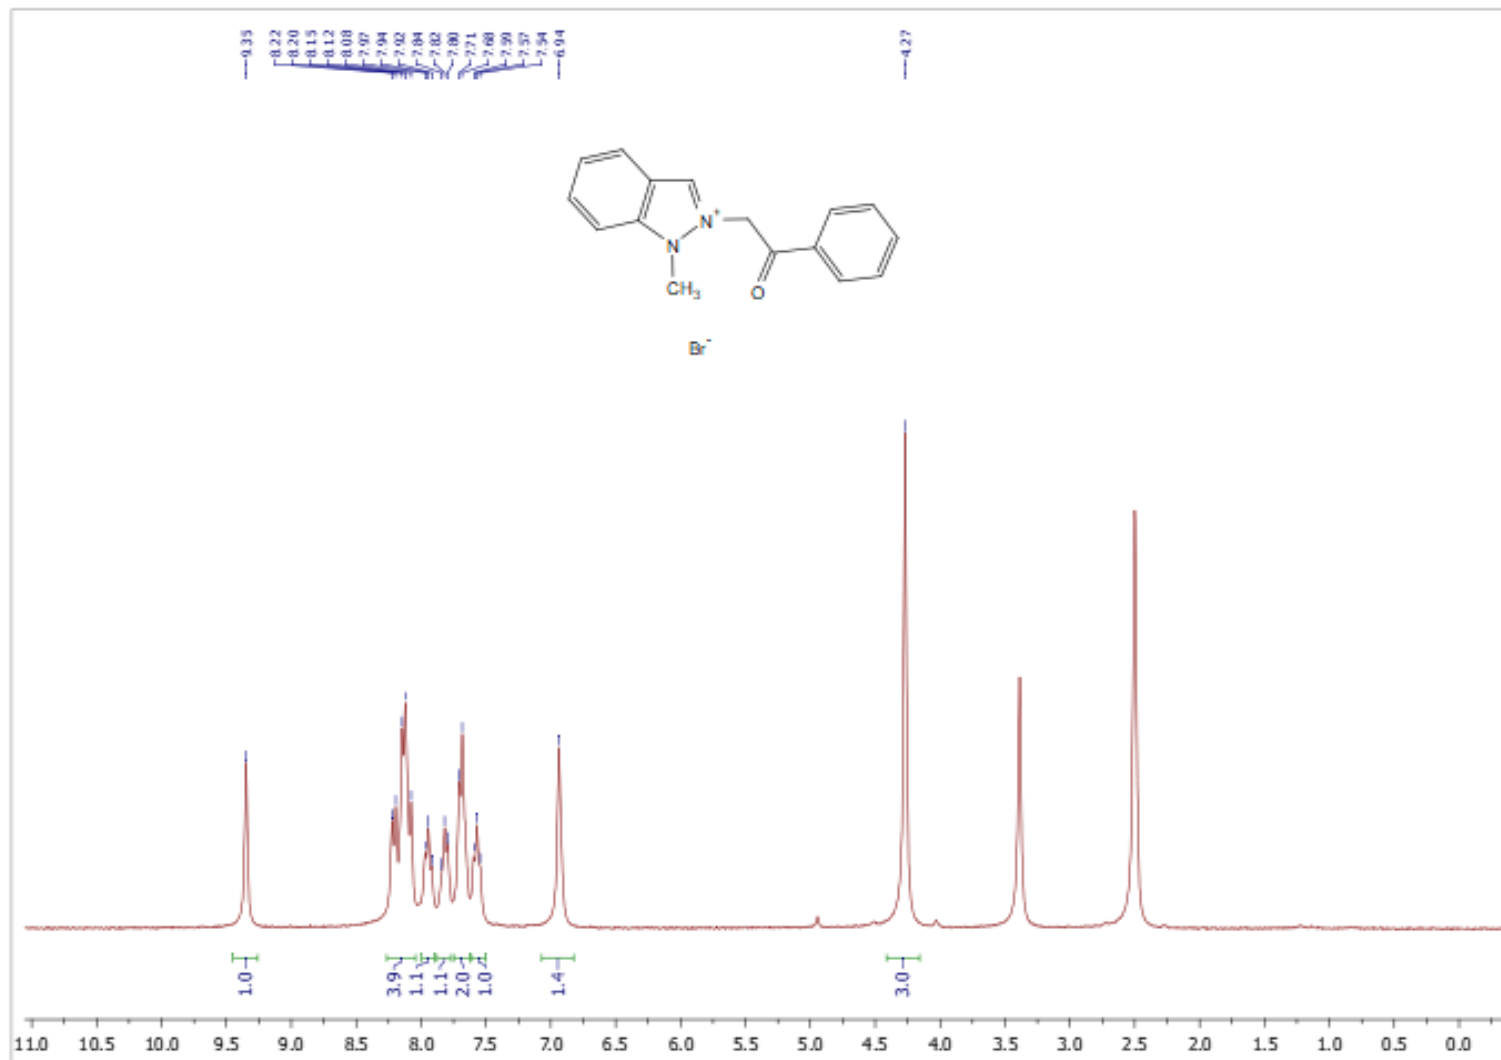

$^{13}\text{C}$  NMR

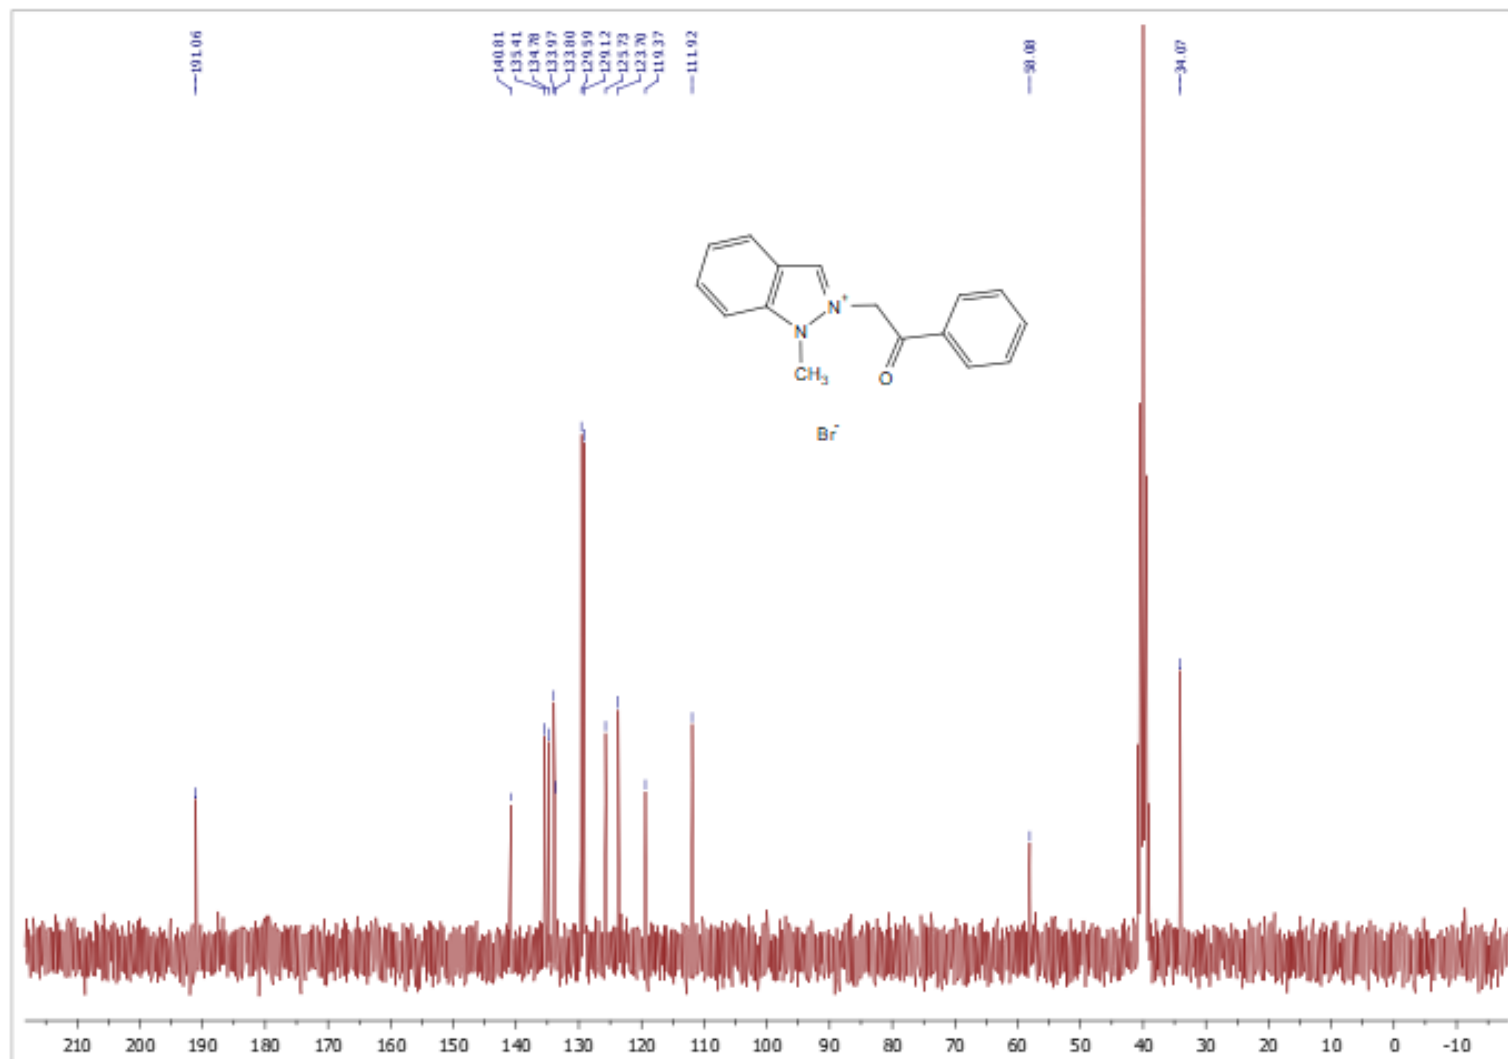

DEPT-135  $^{13}\text{C}$  NMR

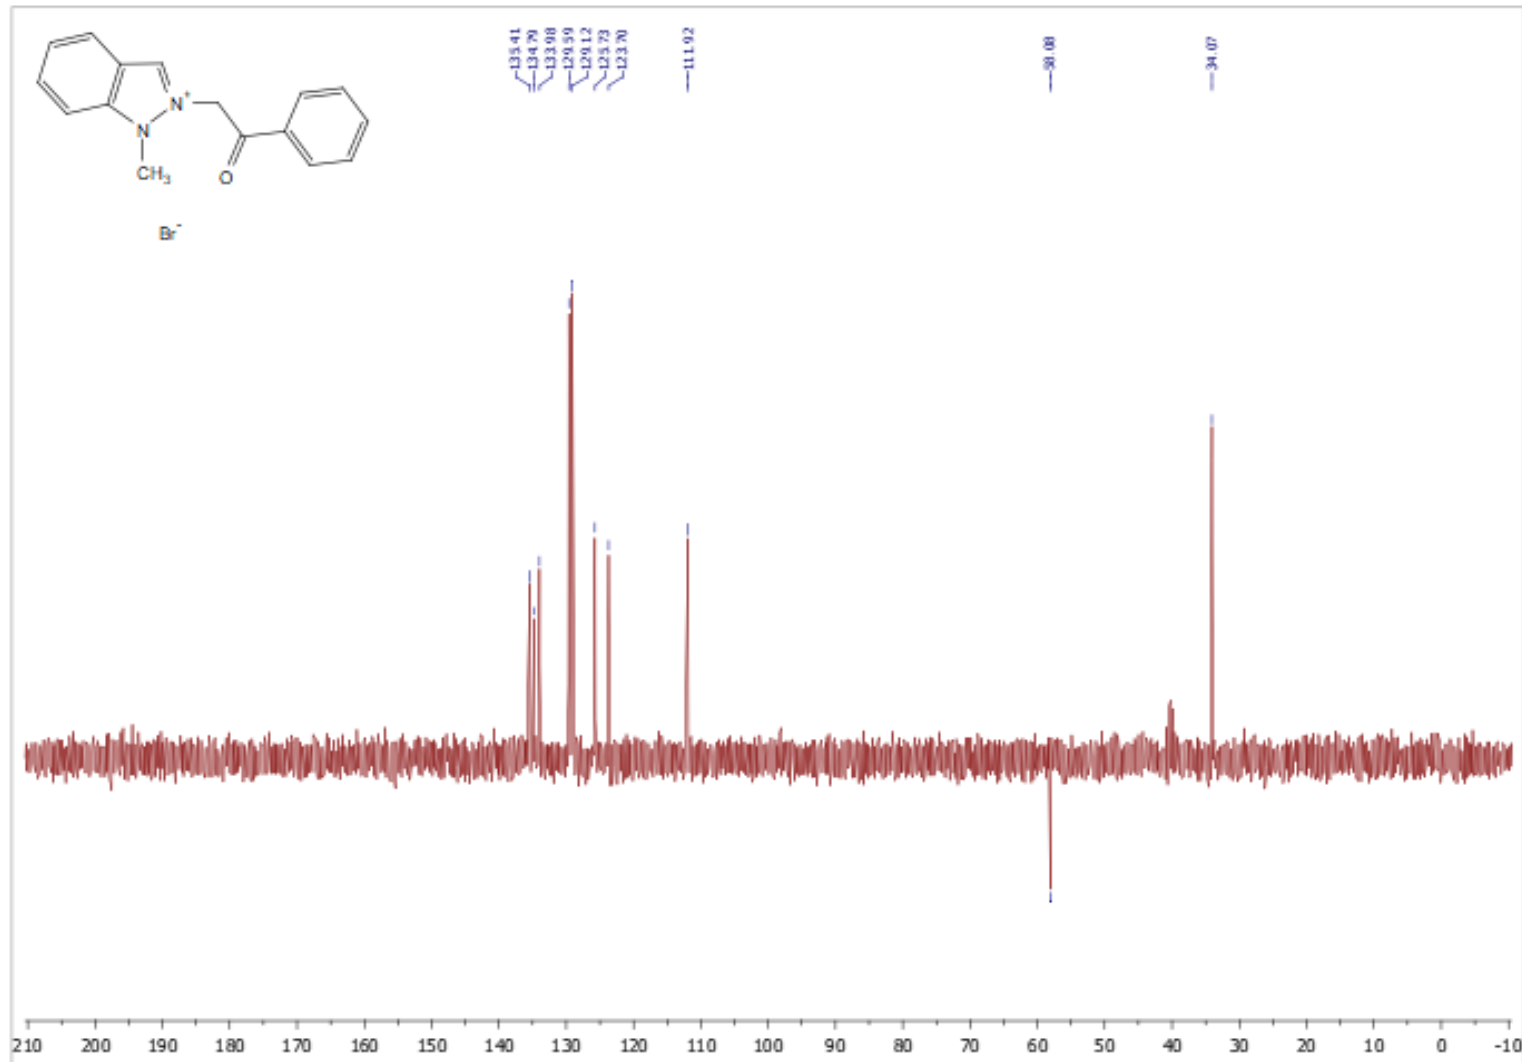



2-(2-ethoxy-2-oxoethyl)-1-methyl-1*H*-indazol-2-ium bromide **6b**

<sup>1</sup>H NMR

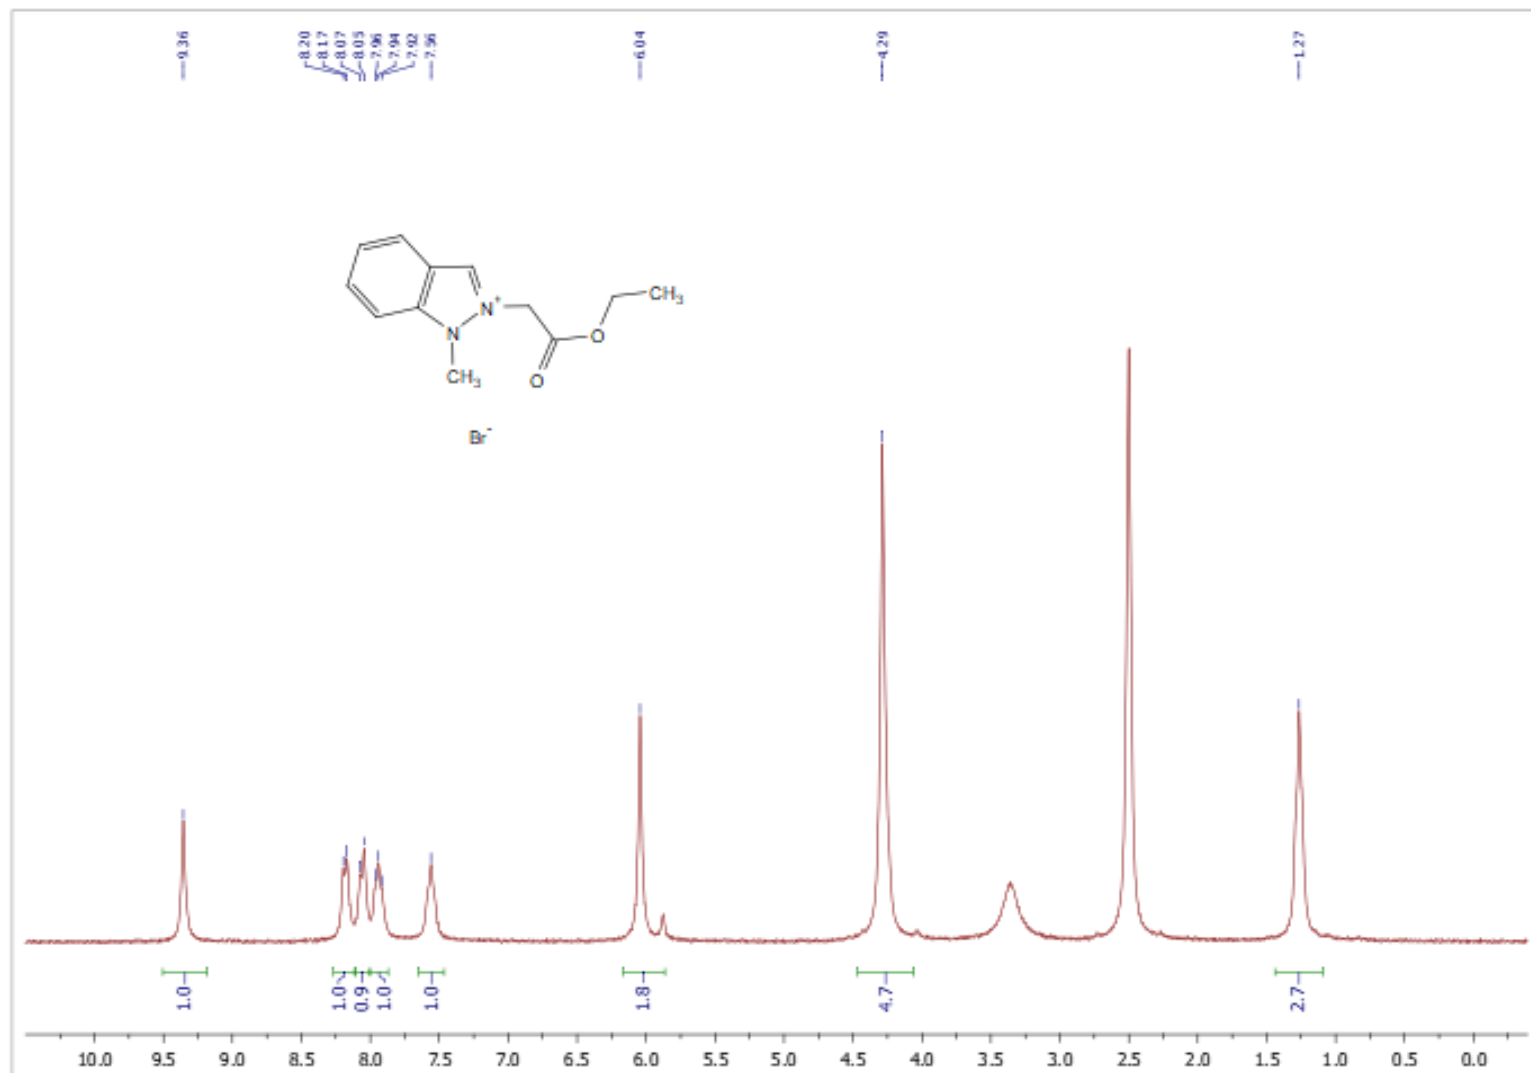

$^{13}\text{C}$  NMR

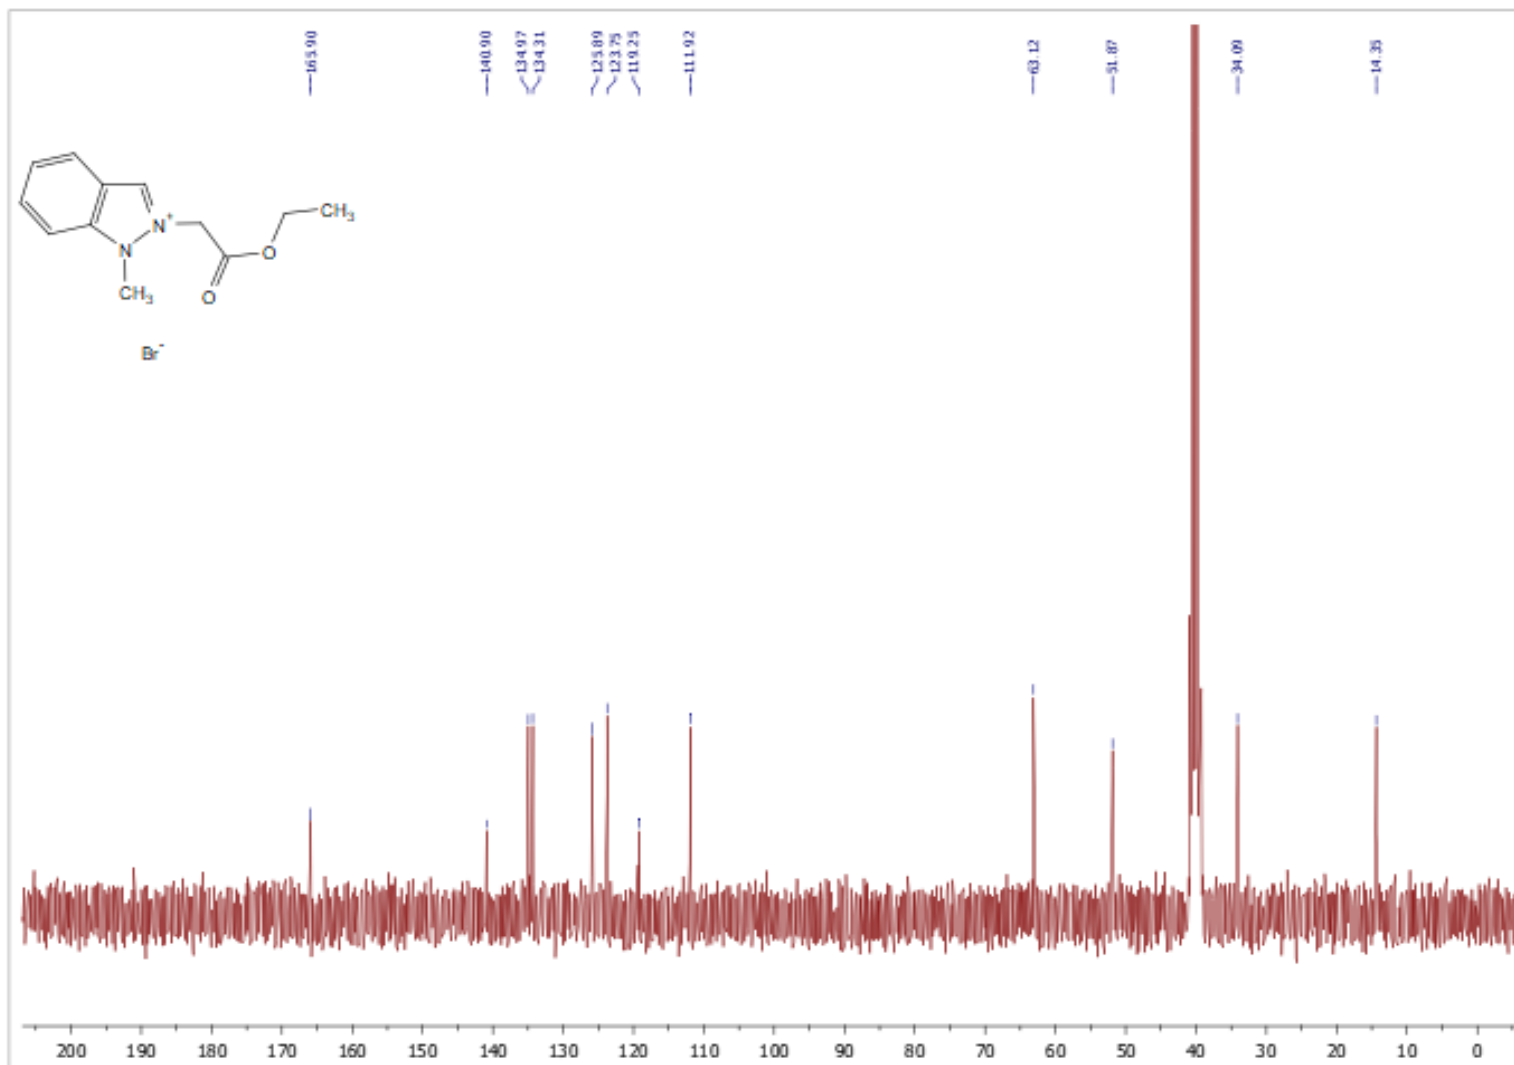

DEPT-135  $^{13}\text{C}$  NMR

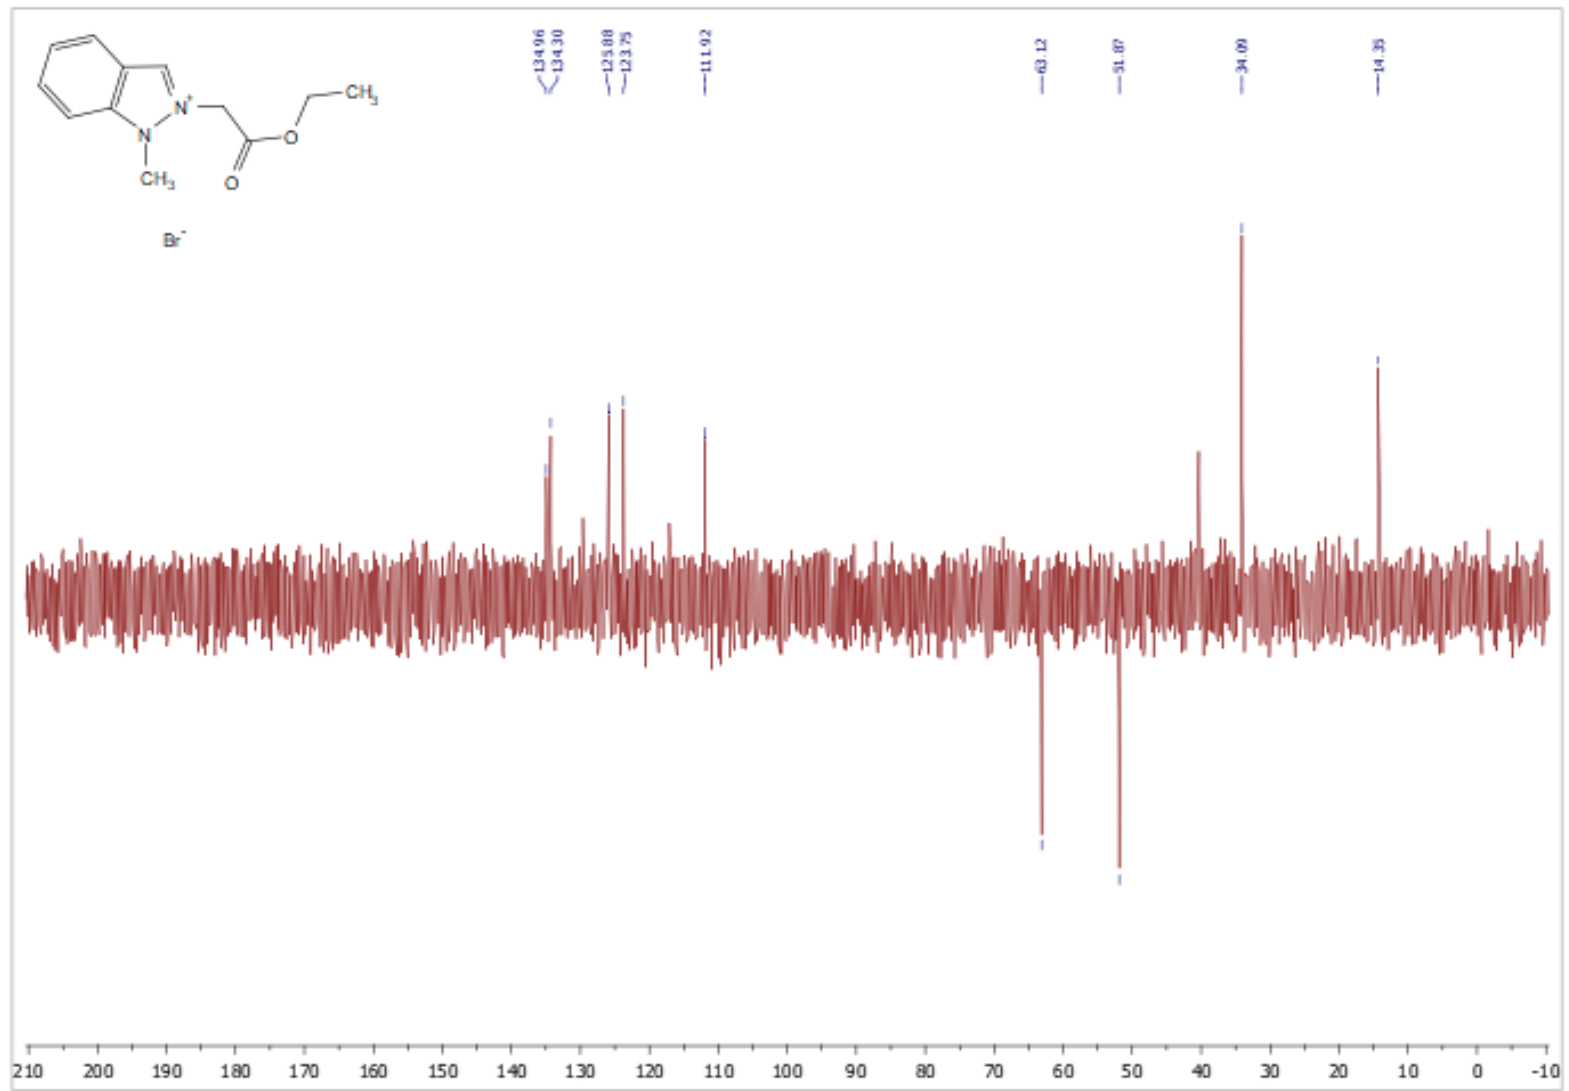

[6-(4-chlorophenyl)-7-fluoropyrrolo[2,1-b][1,3]thiazol-5-yl](phenyl)methanone **3a**

$^1\text{H}$  NMR

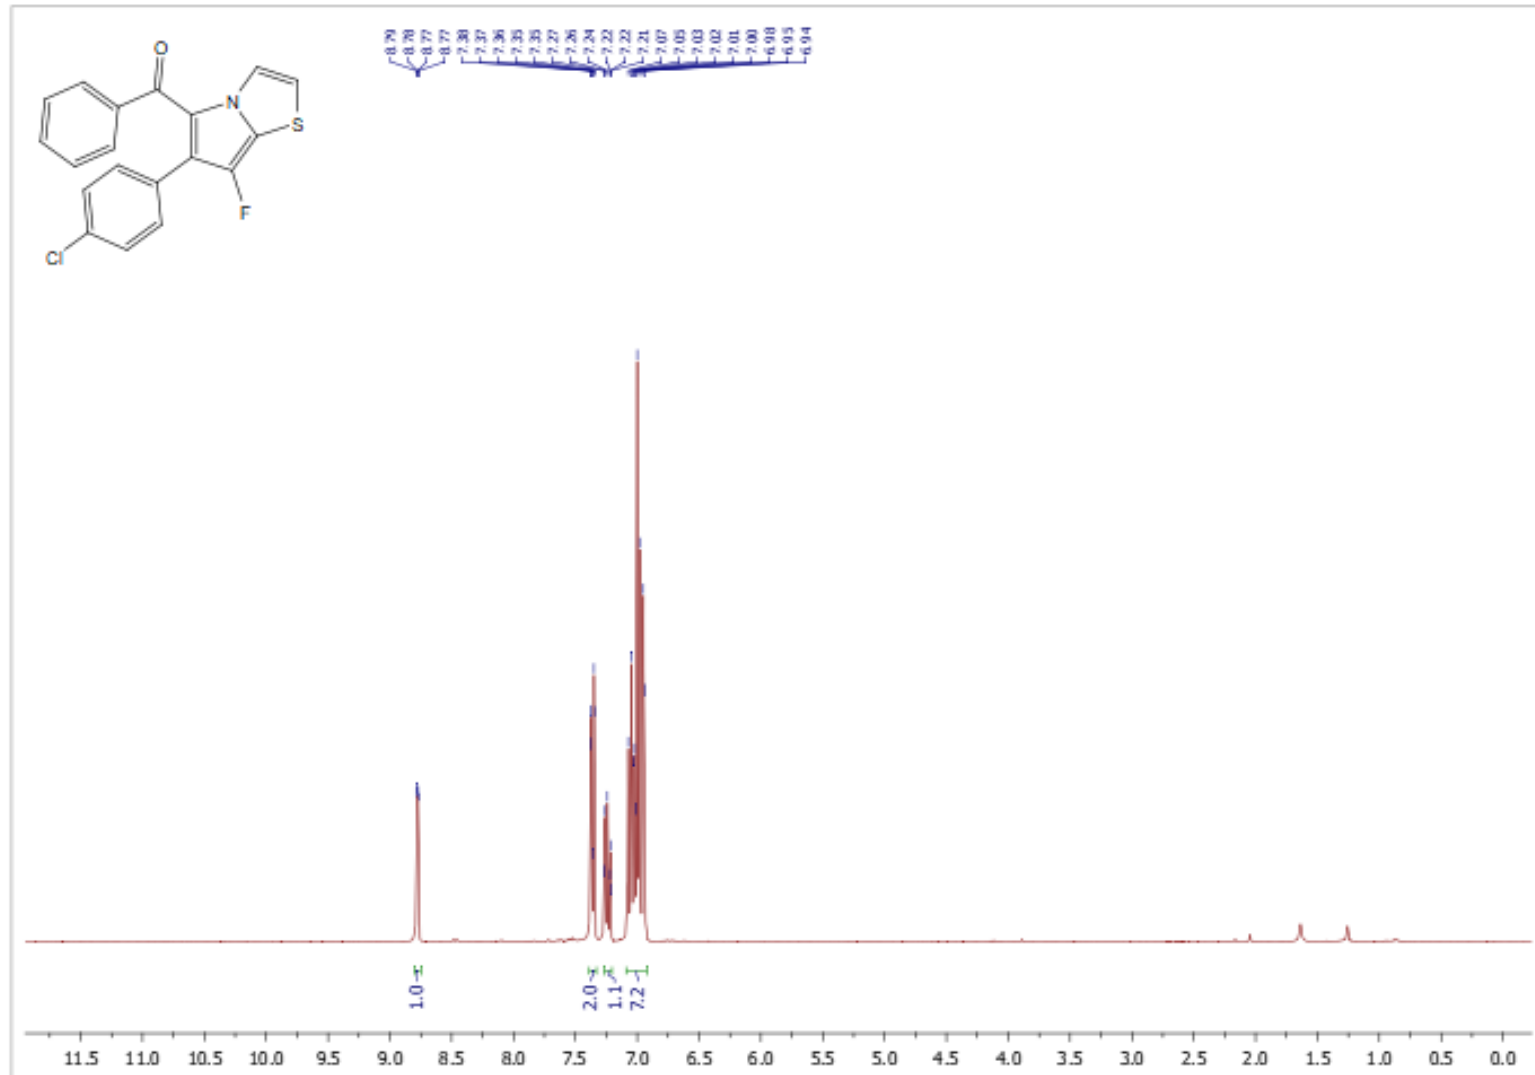

$^{13}\text{C}$  NMR

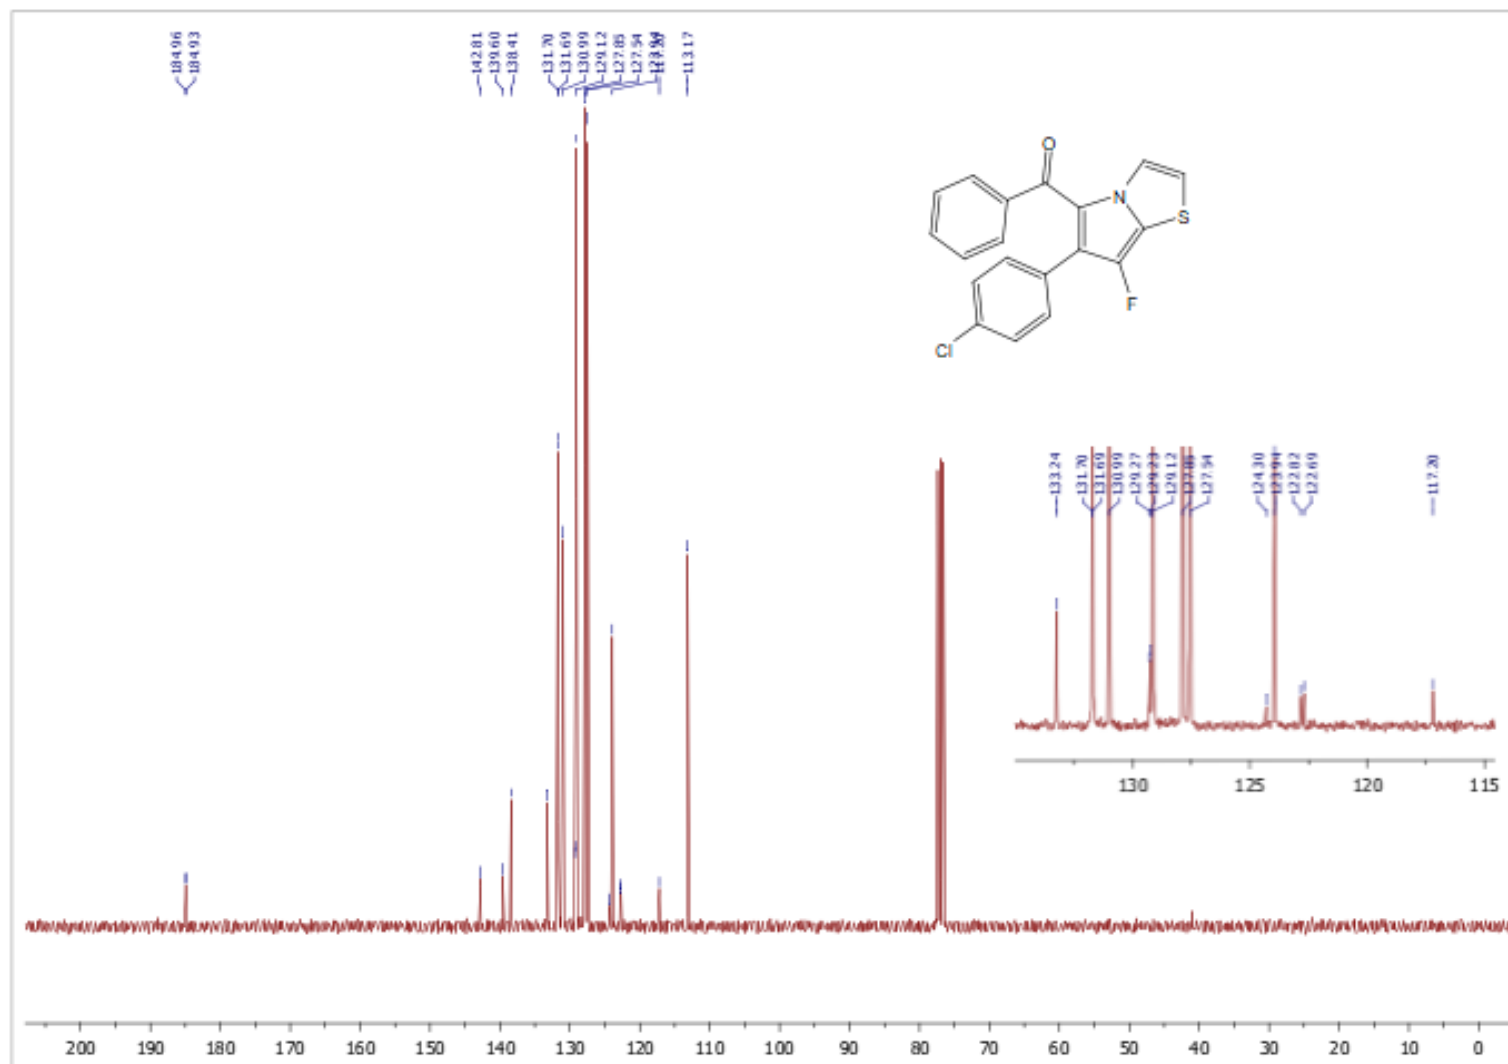

$^{19}\text{F}$  NMR

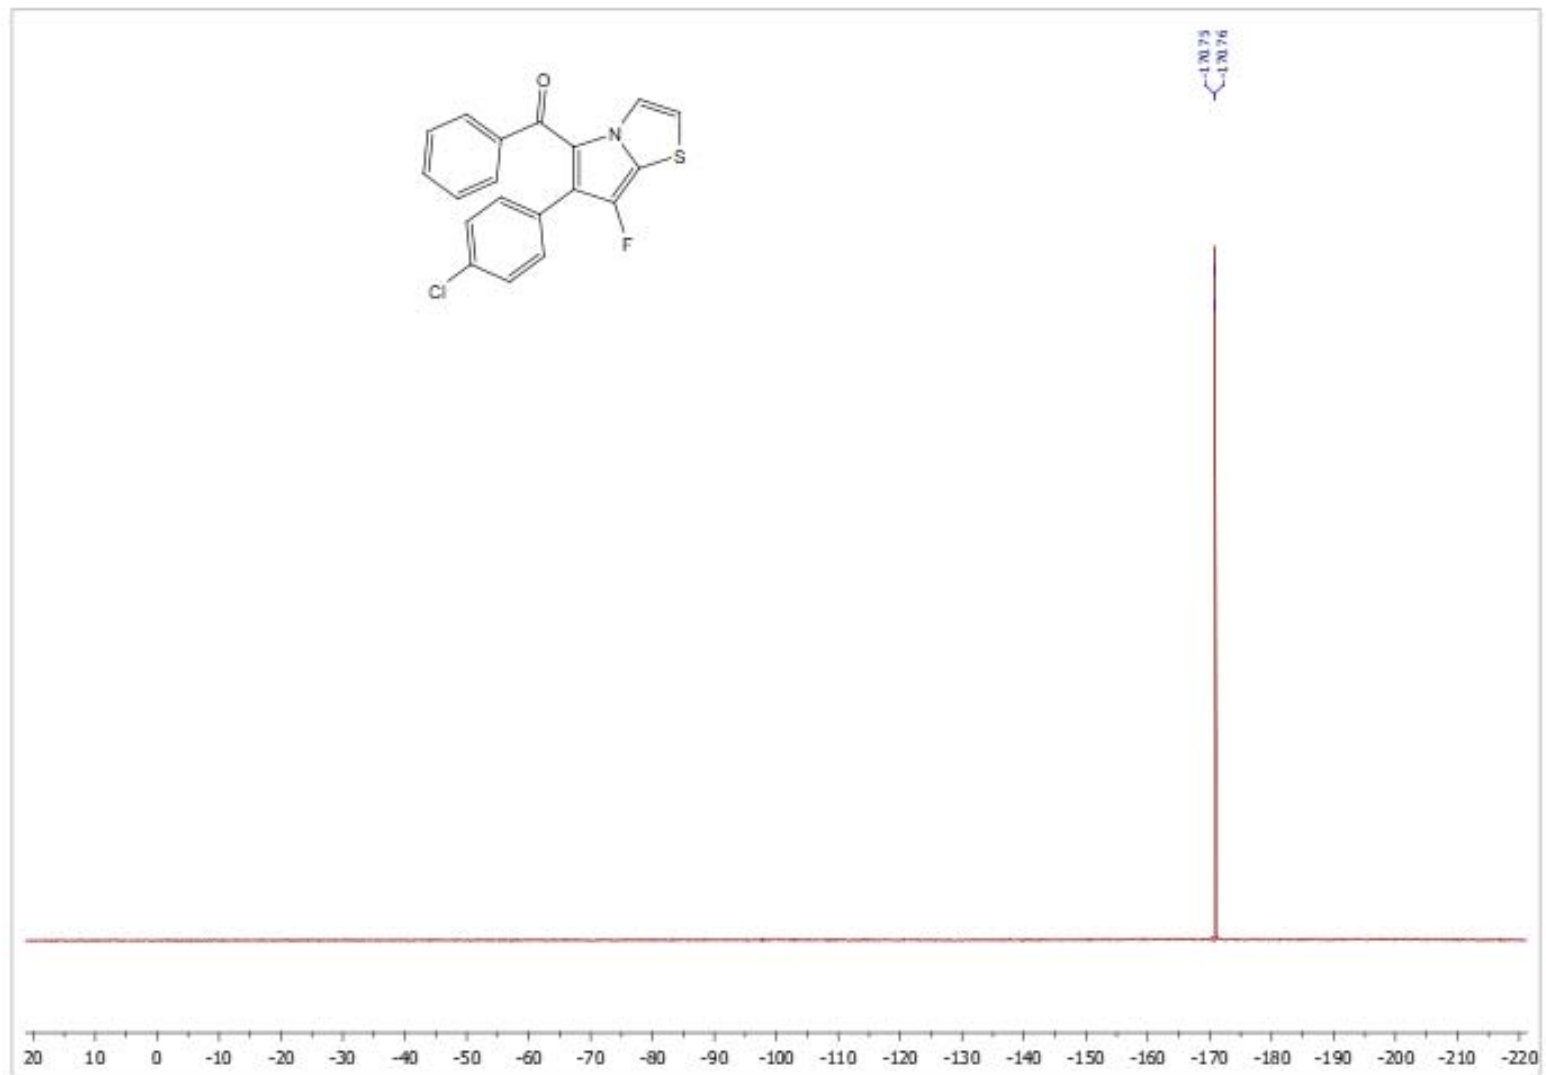

[6-(2-chlorophenyl)-7-fluoropyrrolo[2,1-*b*][1,3]thiazol-5-yl](phenyl)methanone **3b**

<sup>1</sup>H NMR

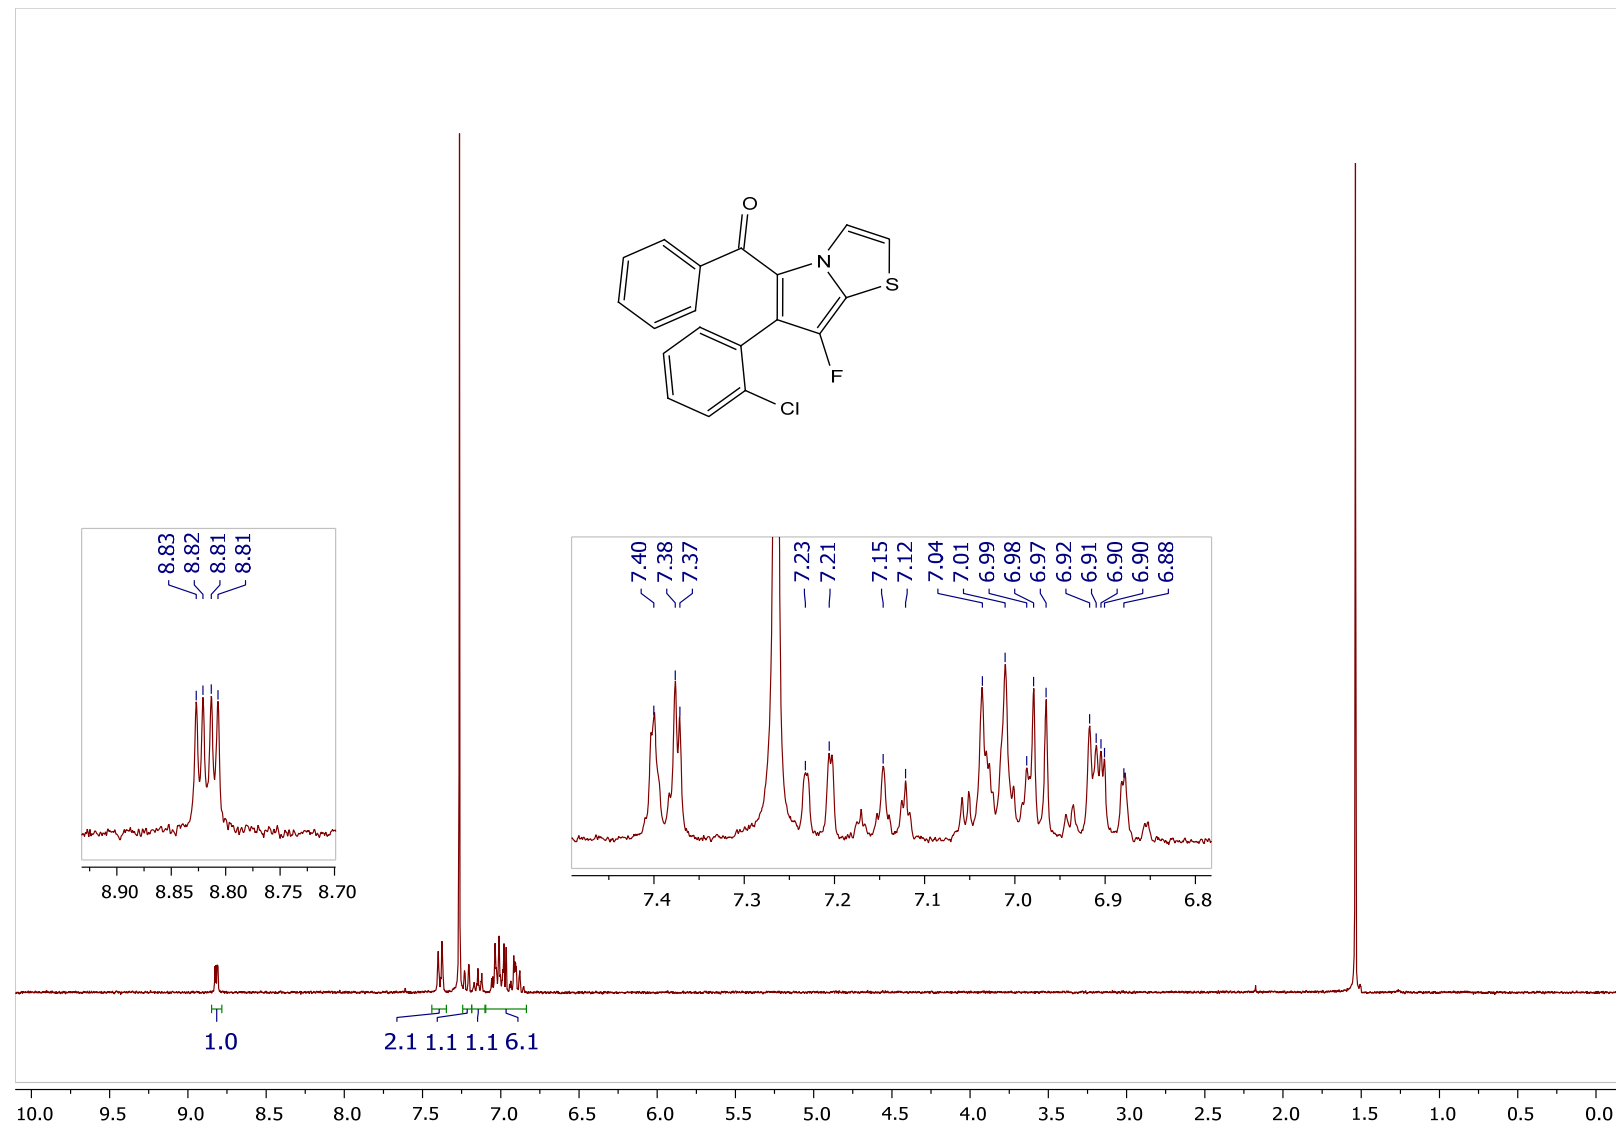

$^{13}\text{C}$  NMR

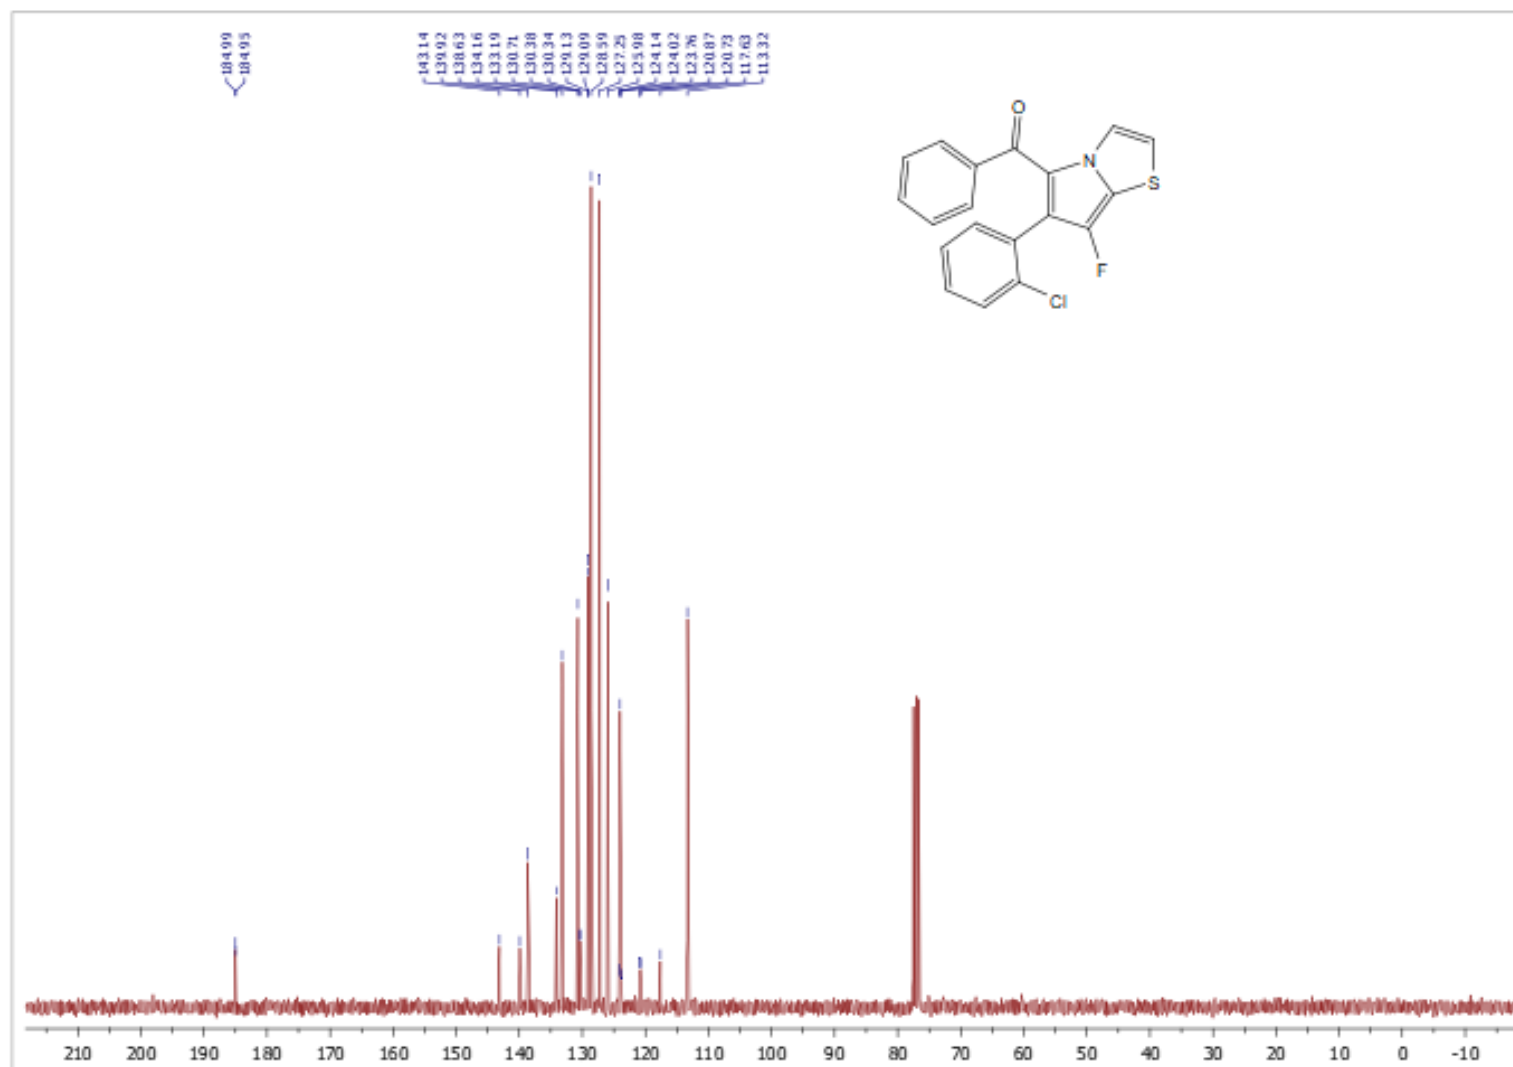



$^{19}\text{F}$  NMR

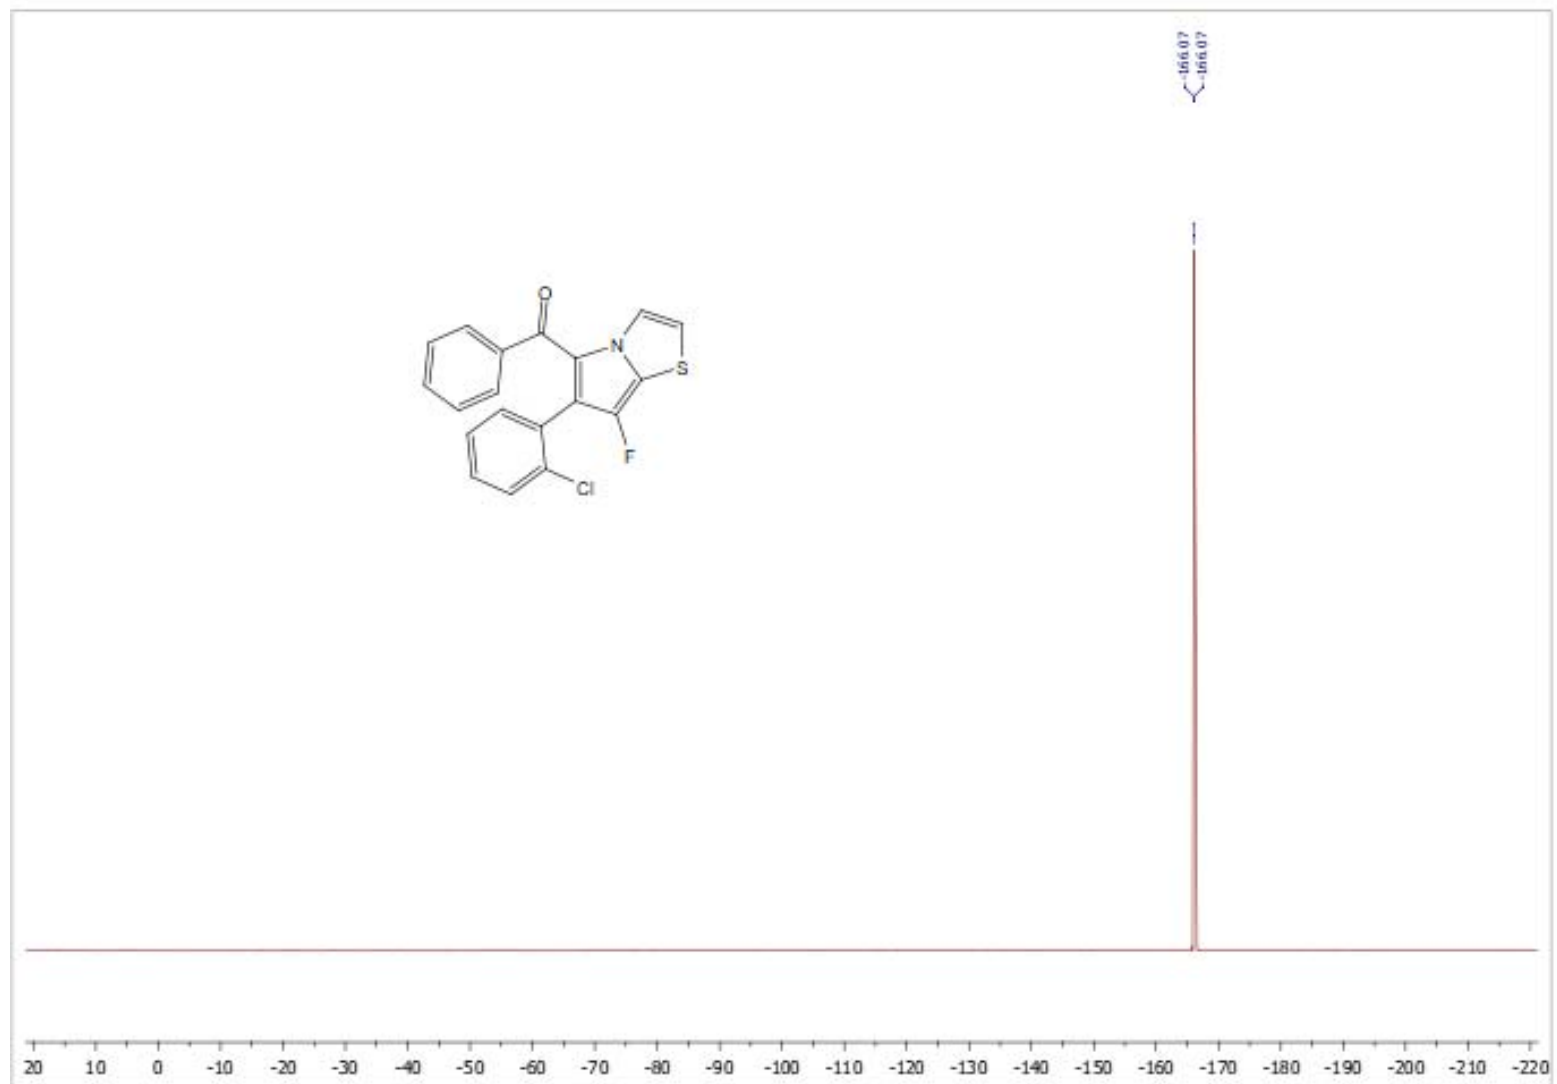

[7-fluoro-6-(4-methoxyphenyl)pyrrolo[2,1-b][1,3]thiazol-5-yl](phenyl)methanone **3c**

<sup>1</sup>H NMR

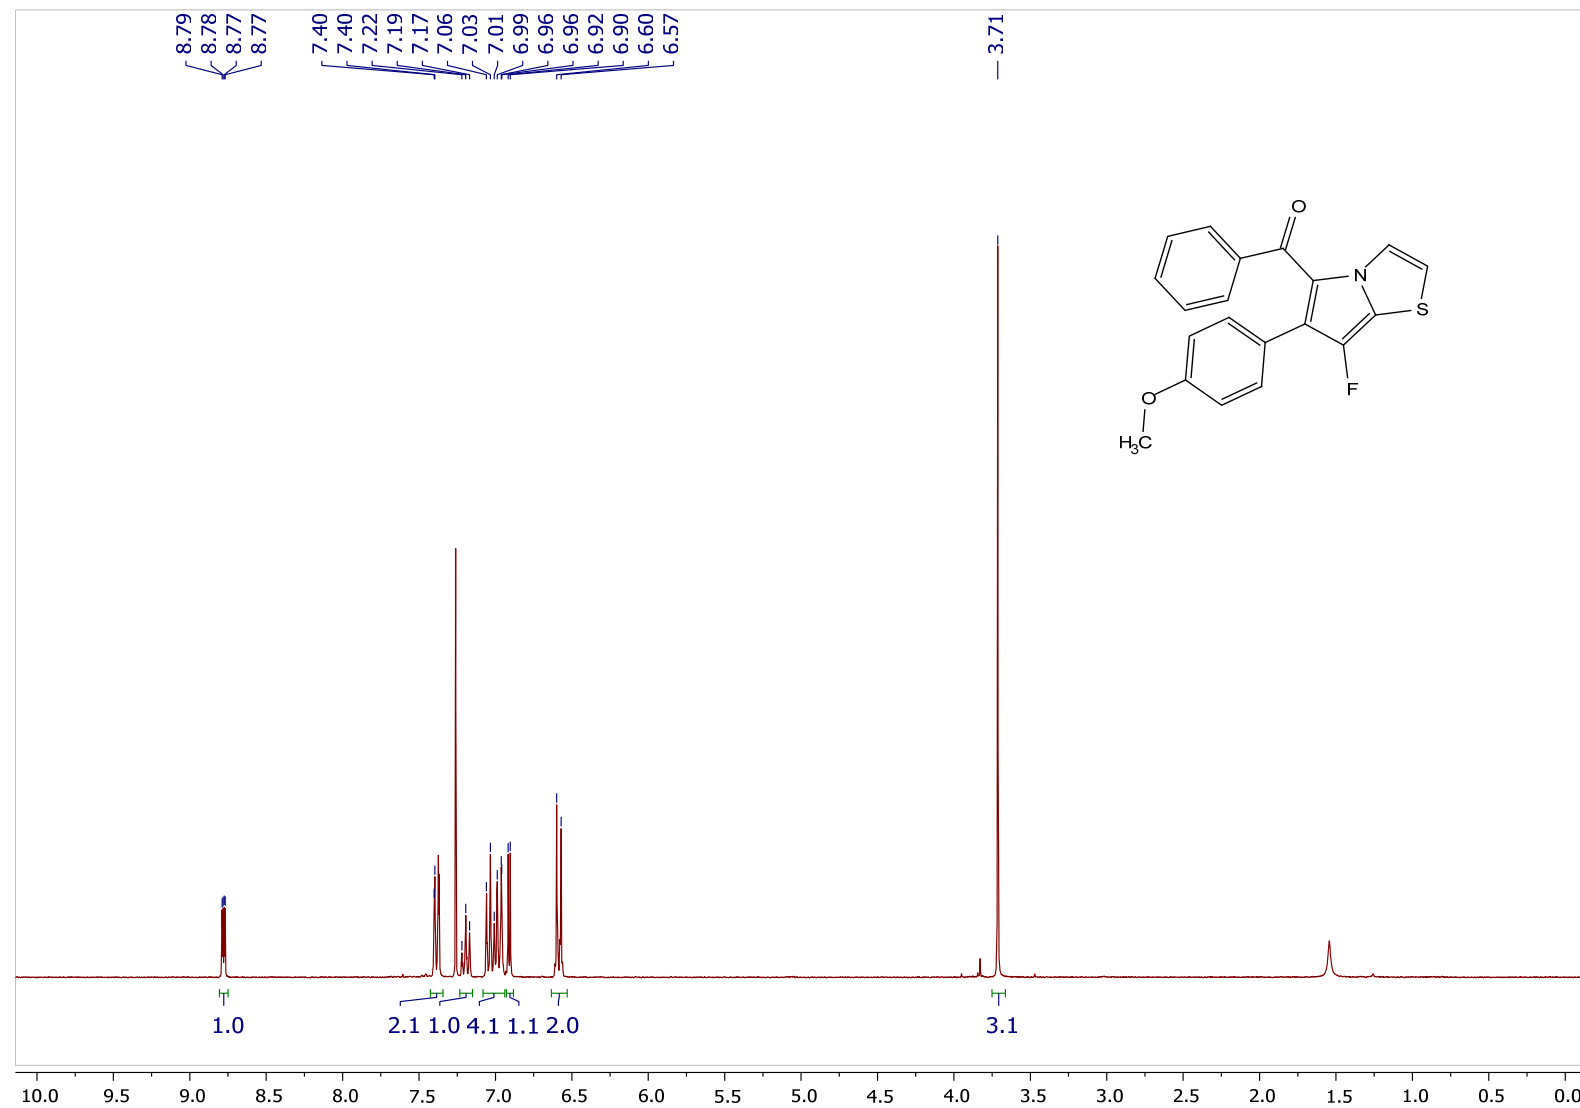

$^{13}\text{C}$  NMR

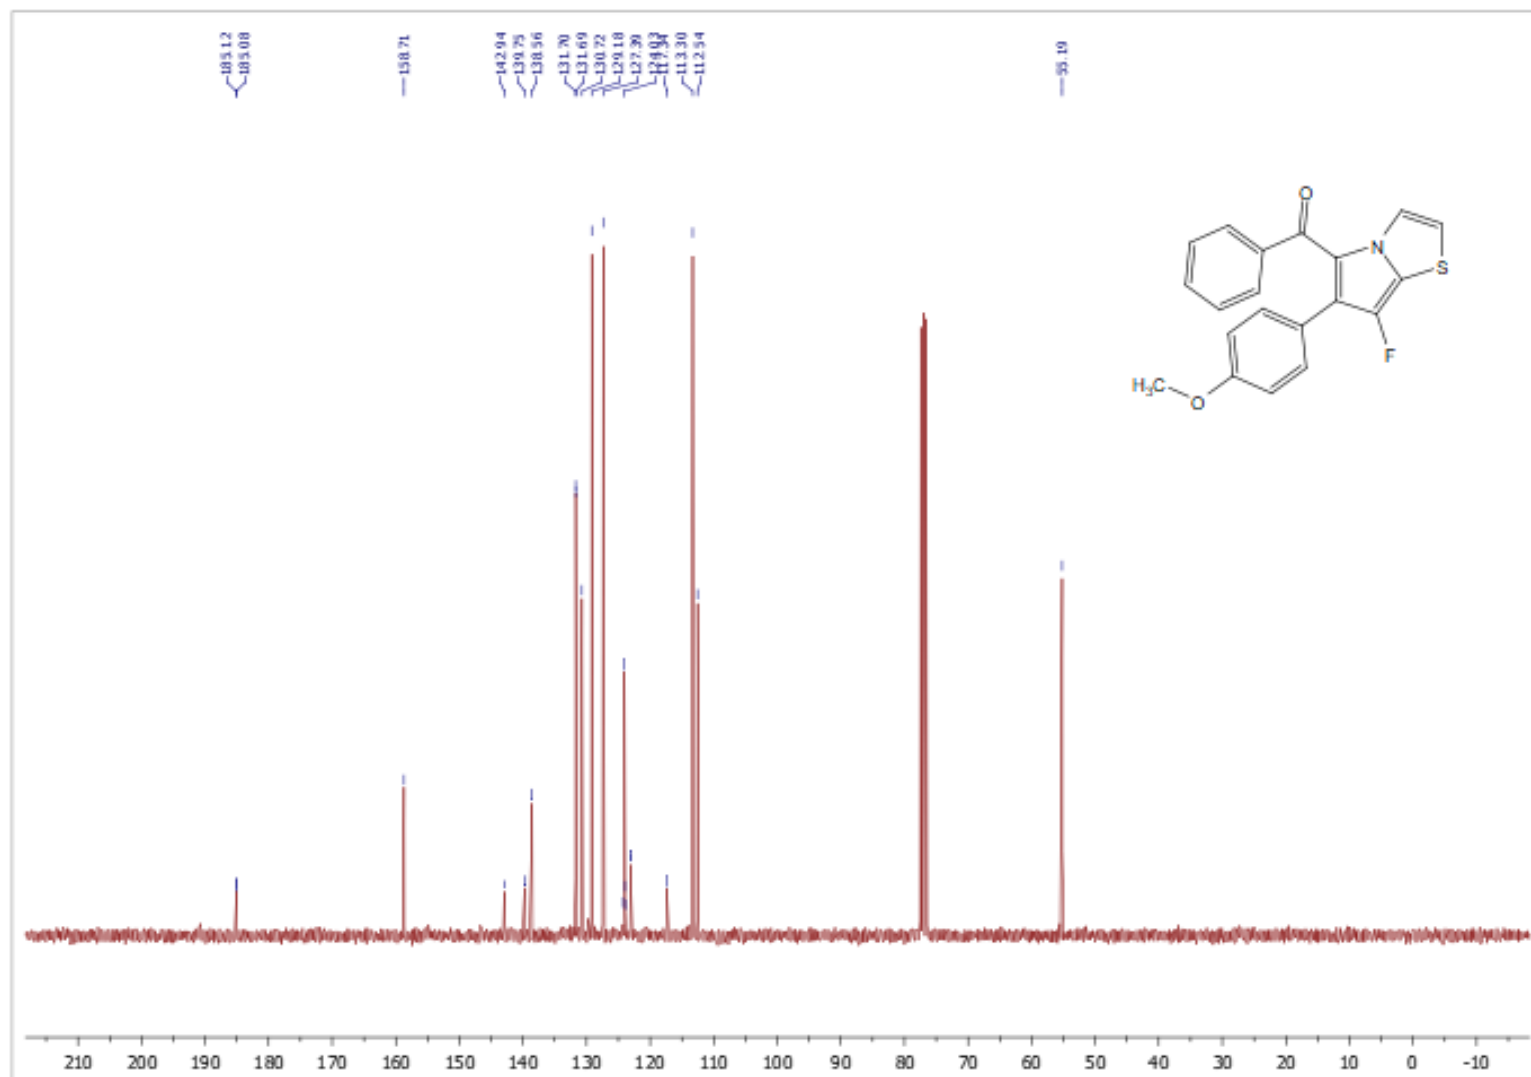

DEPT-135  $^{13}\text{C}$  NMR

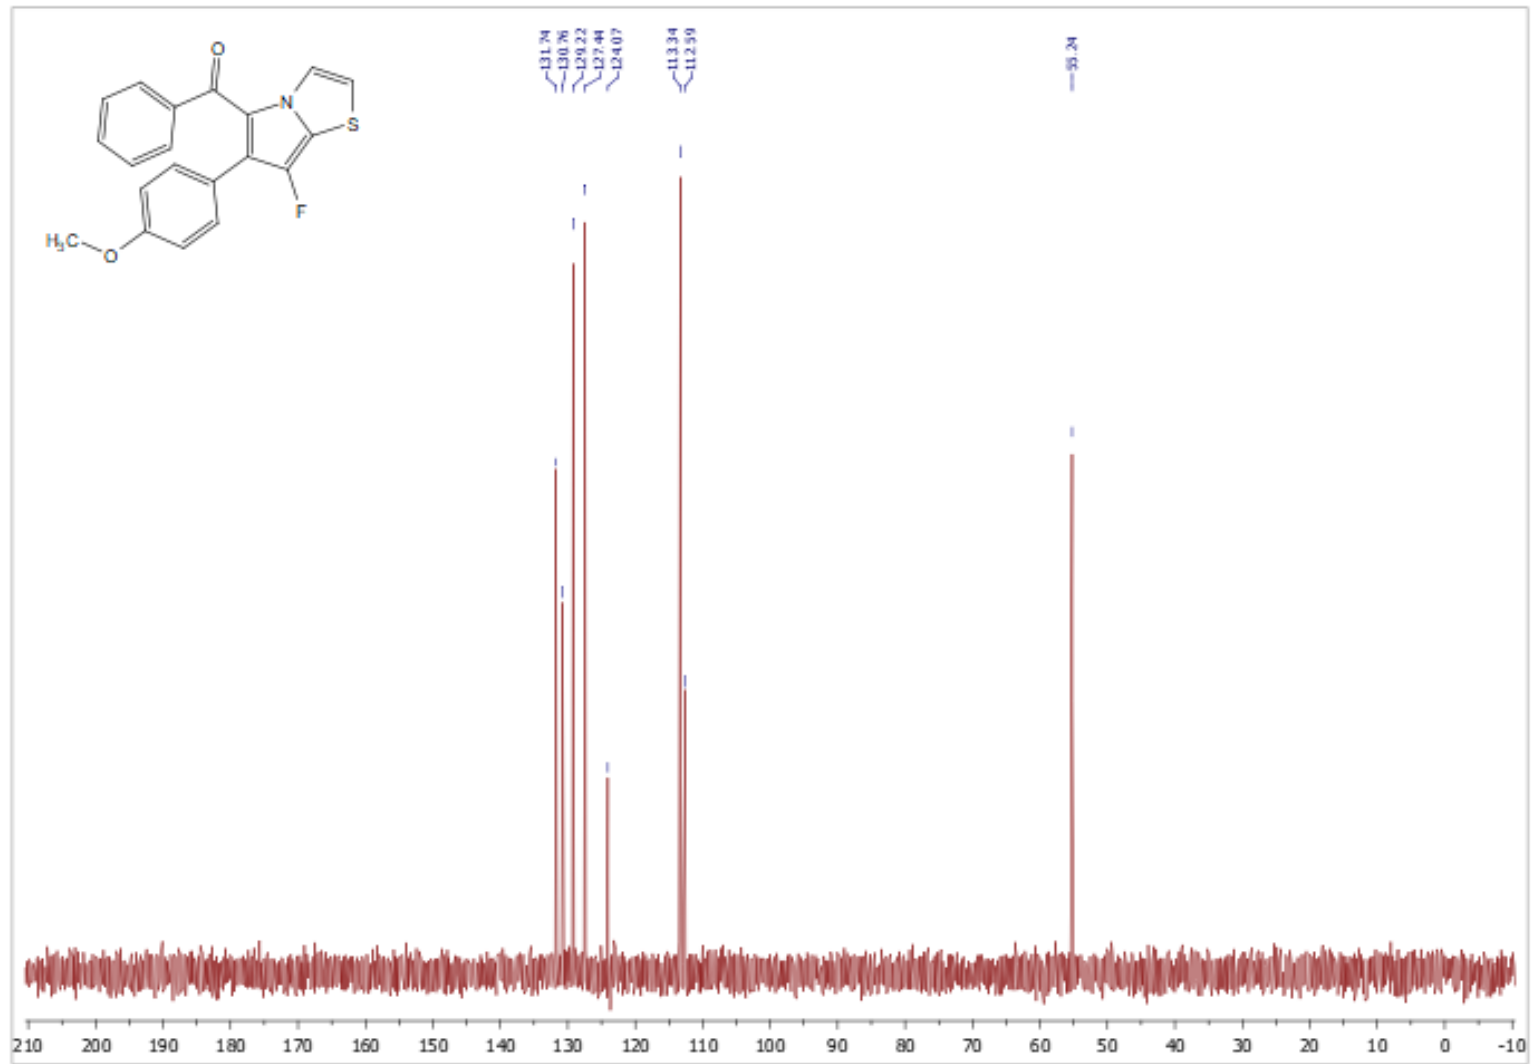

$^1\text{H}$ - $^1\text{H}$  COSY NMR

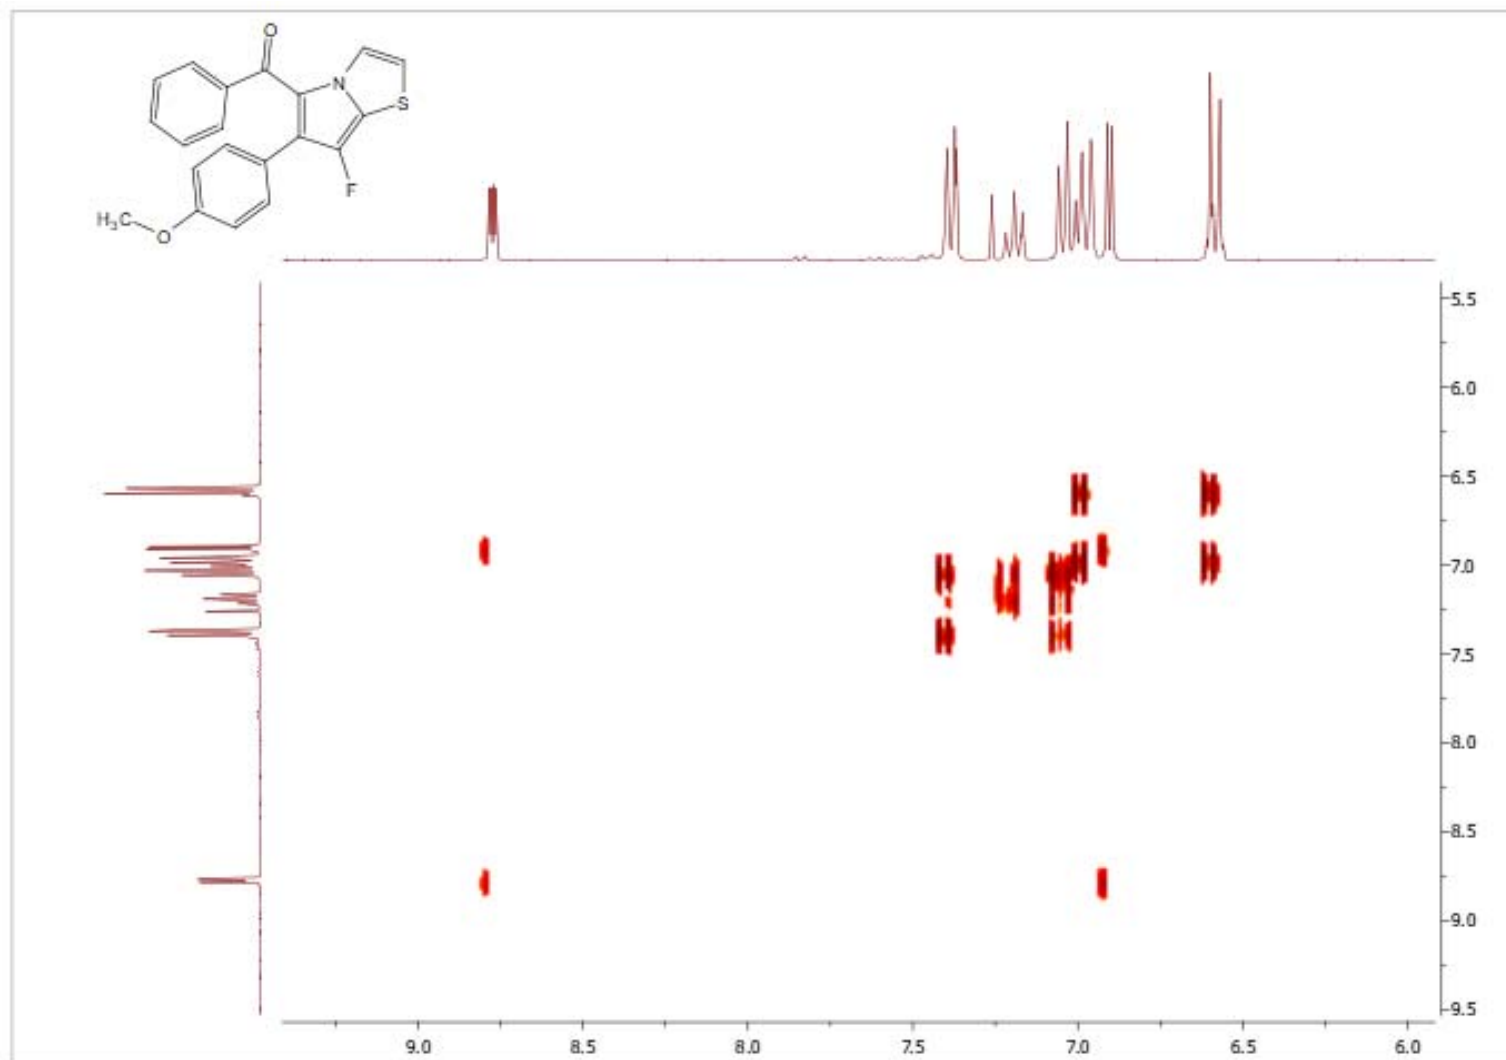

$^1\text{H}$ - $^{13}\text{C}$  HSQC NMR

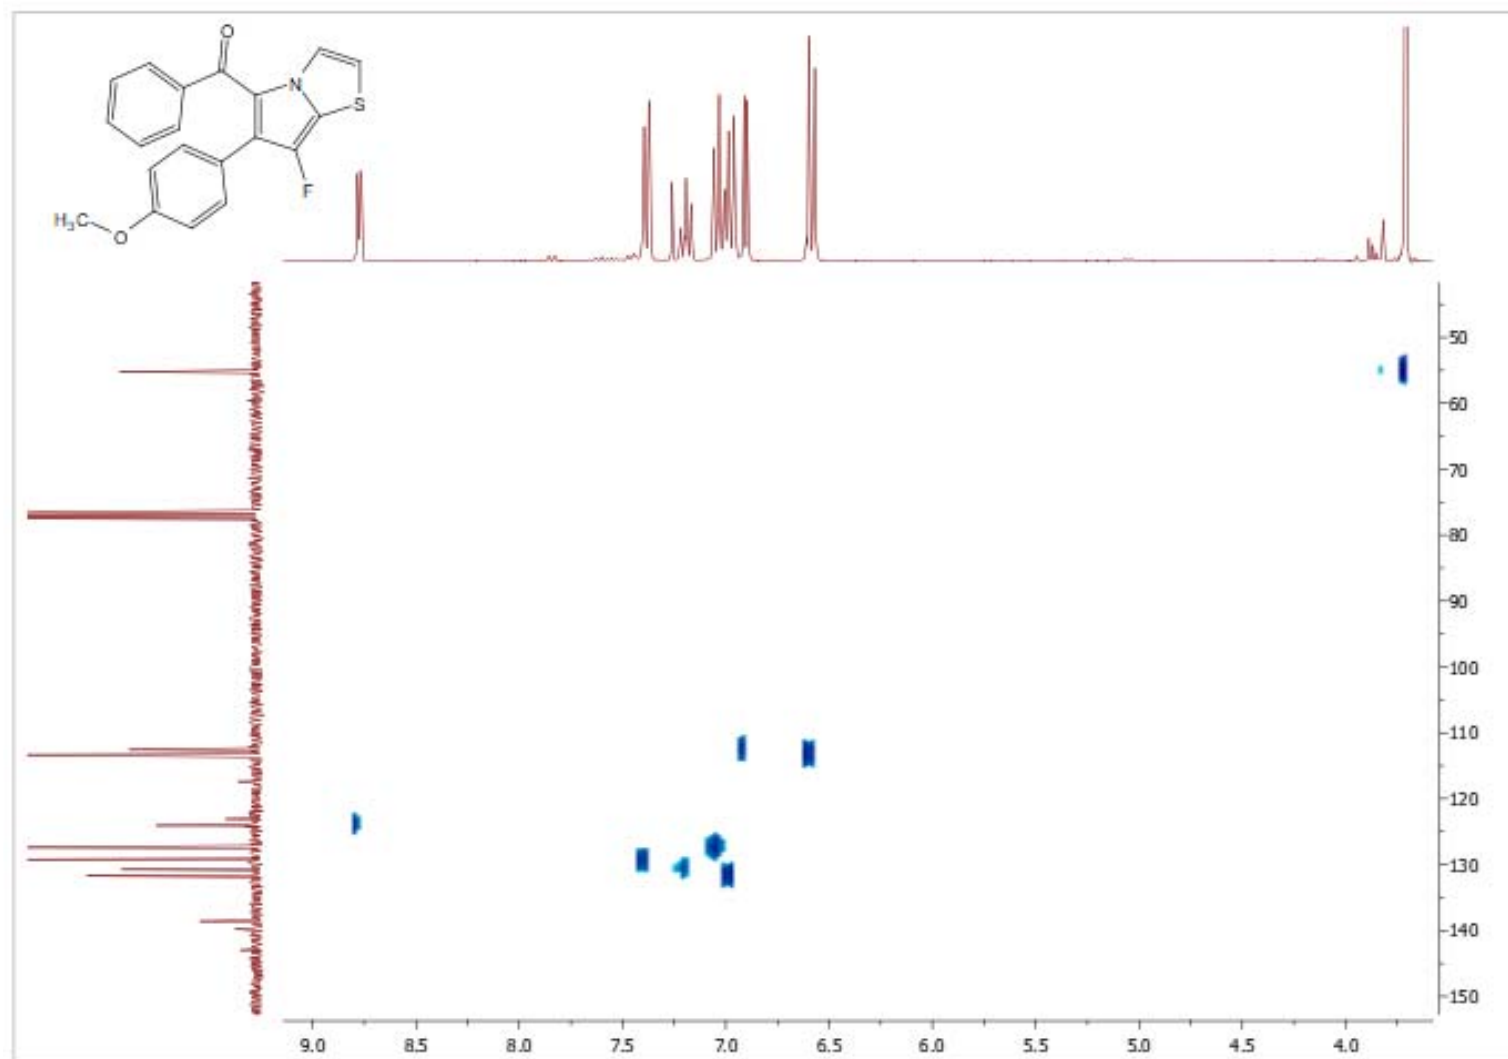

$^1\text{H}$ - $^{13}\text{C}$  HMBC NMR

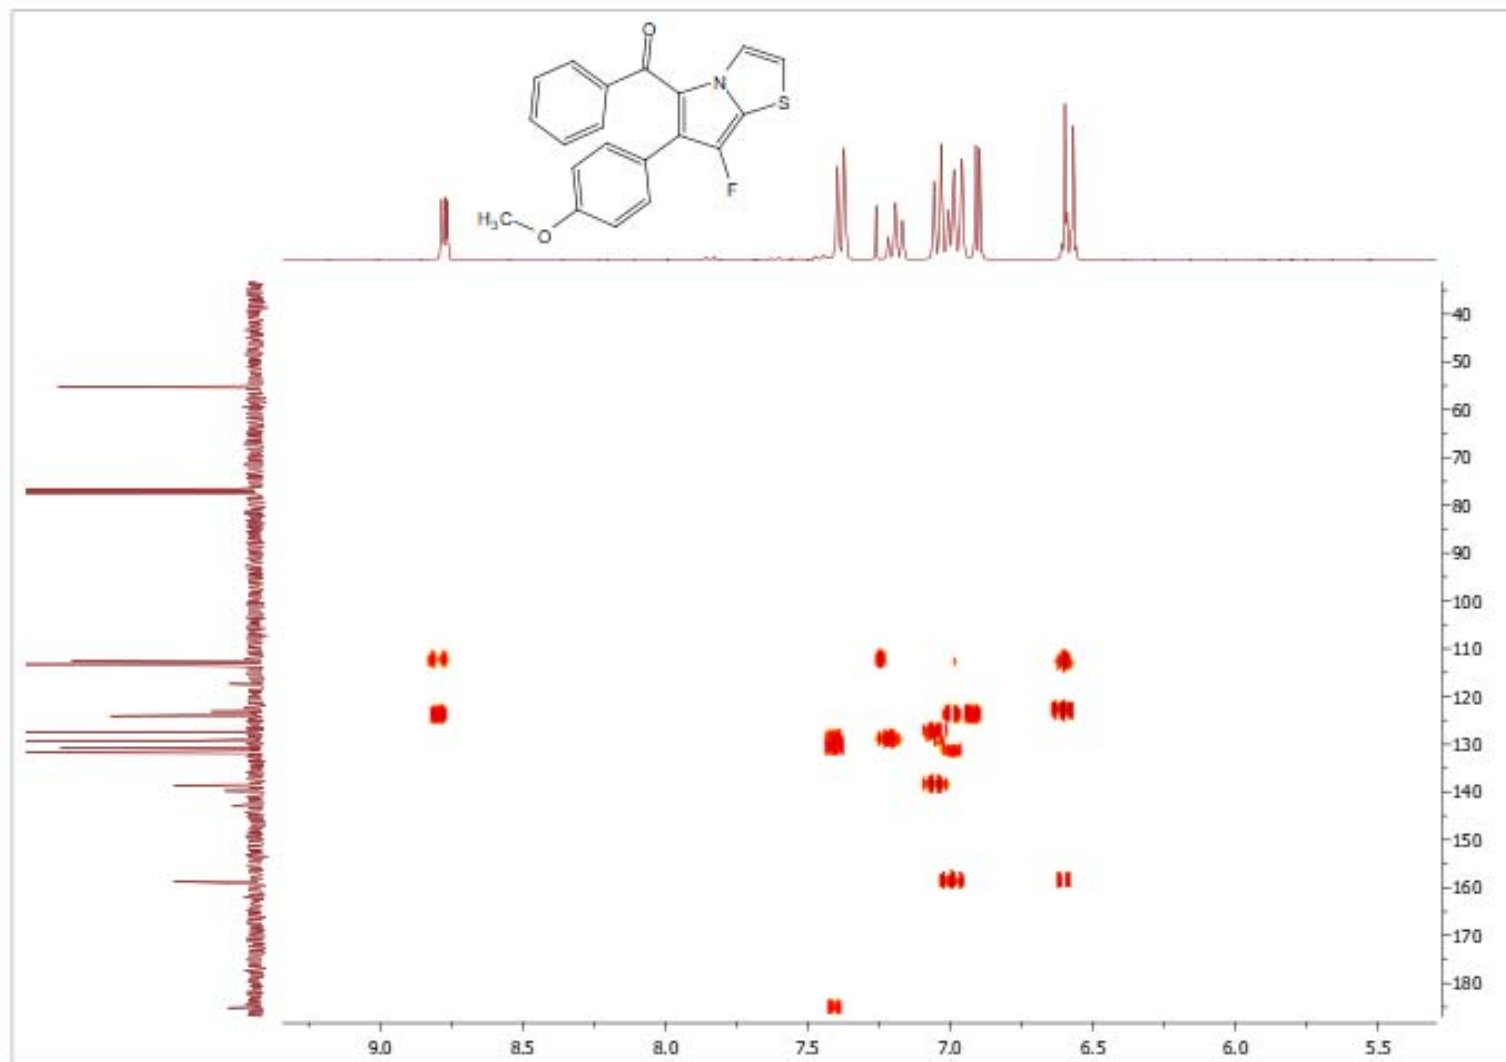

$^{19}\text{F}$  NMR

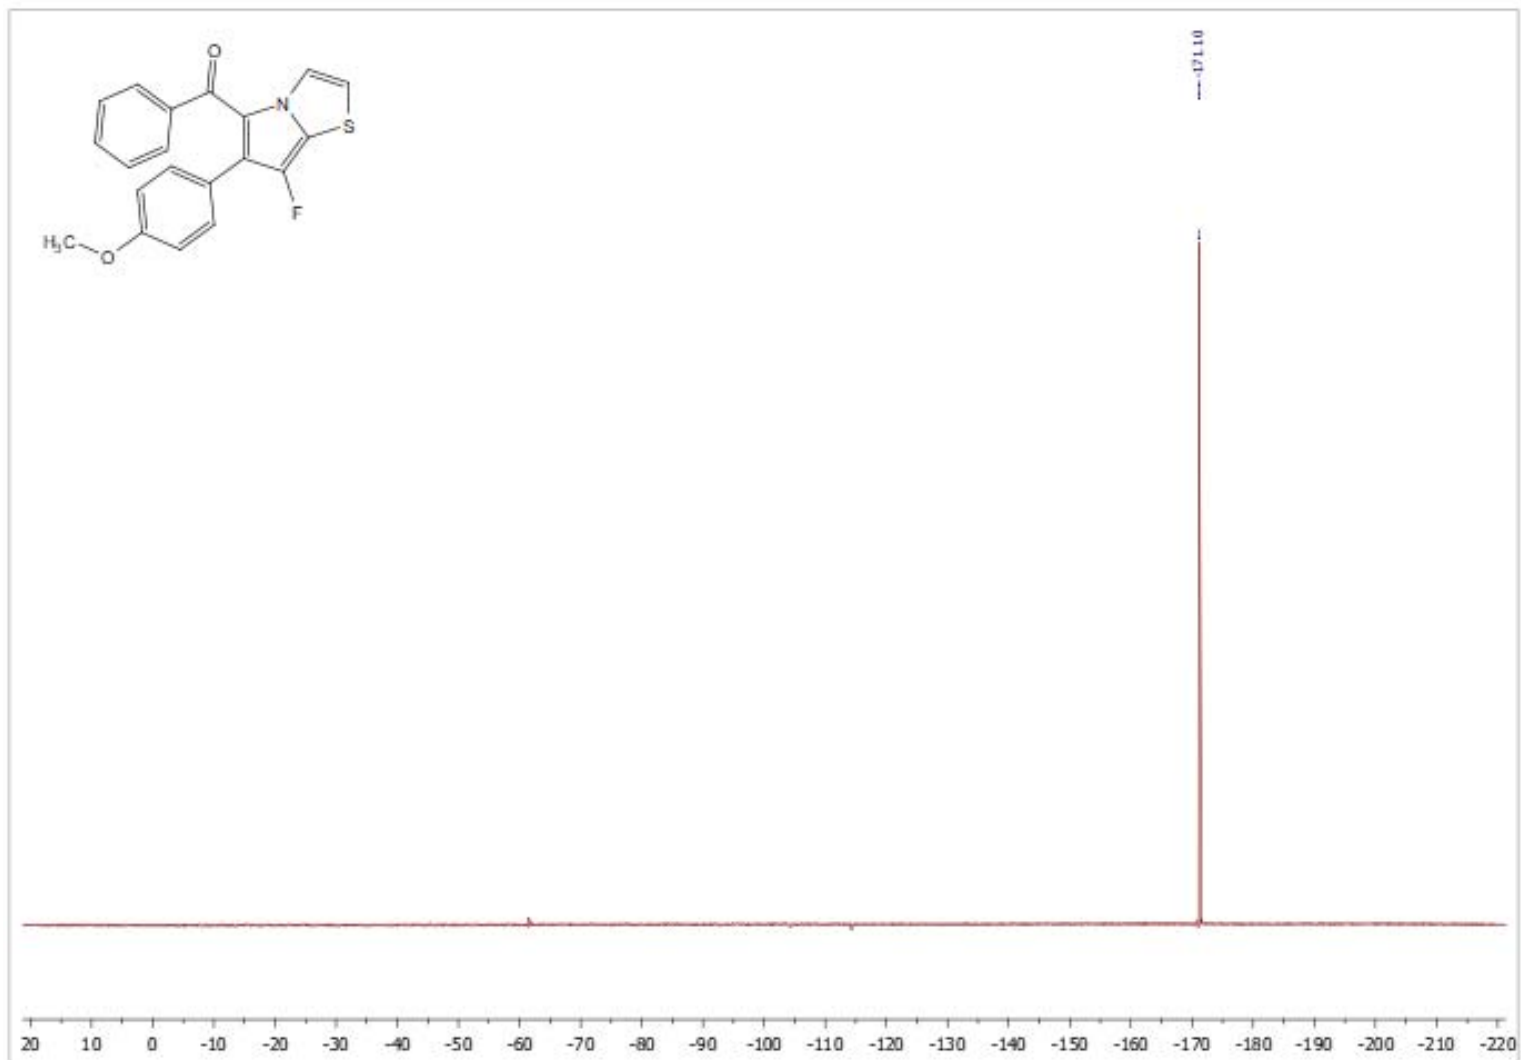



[7-fluoro-6-(4-nitrophenyl)pyrrolo[2,1-*b*][1,3]thiazol-5-yl](phenyl)methanone **3d**

<sup>1</sup>H NMR

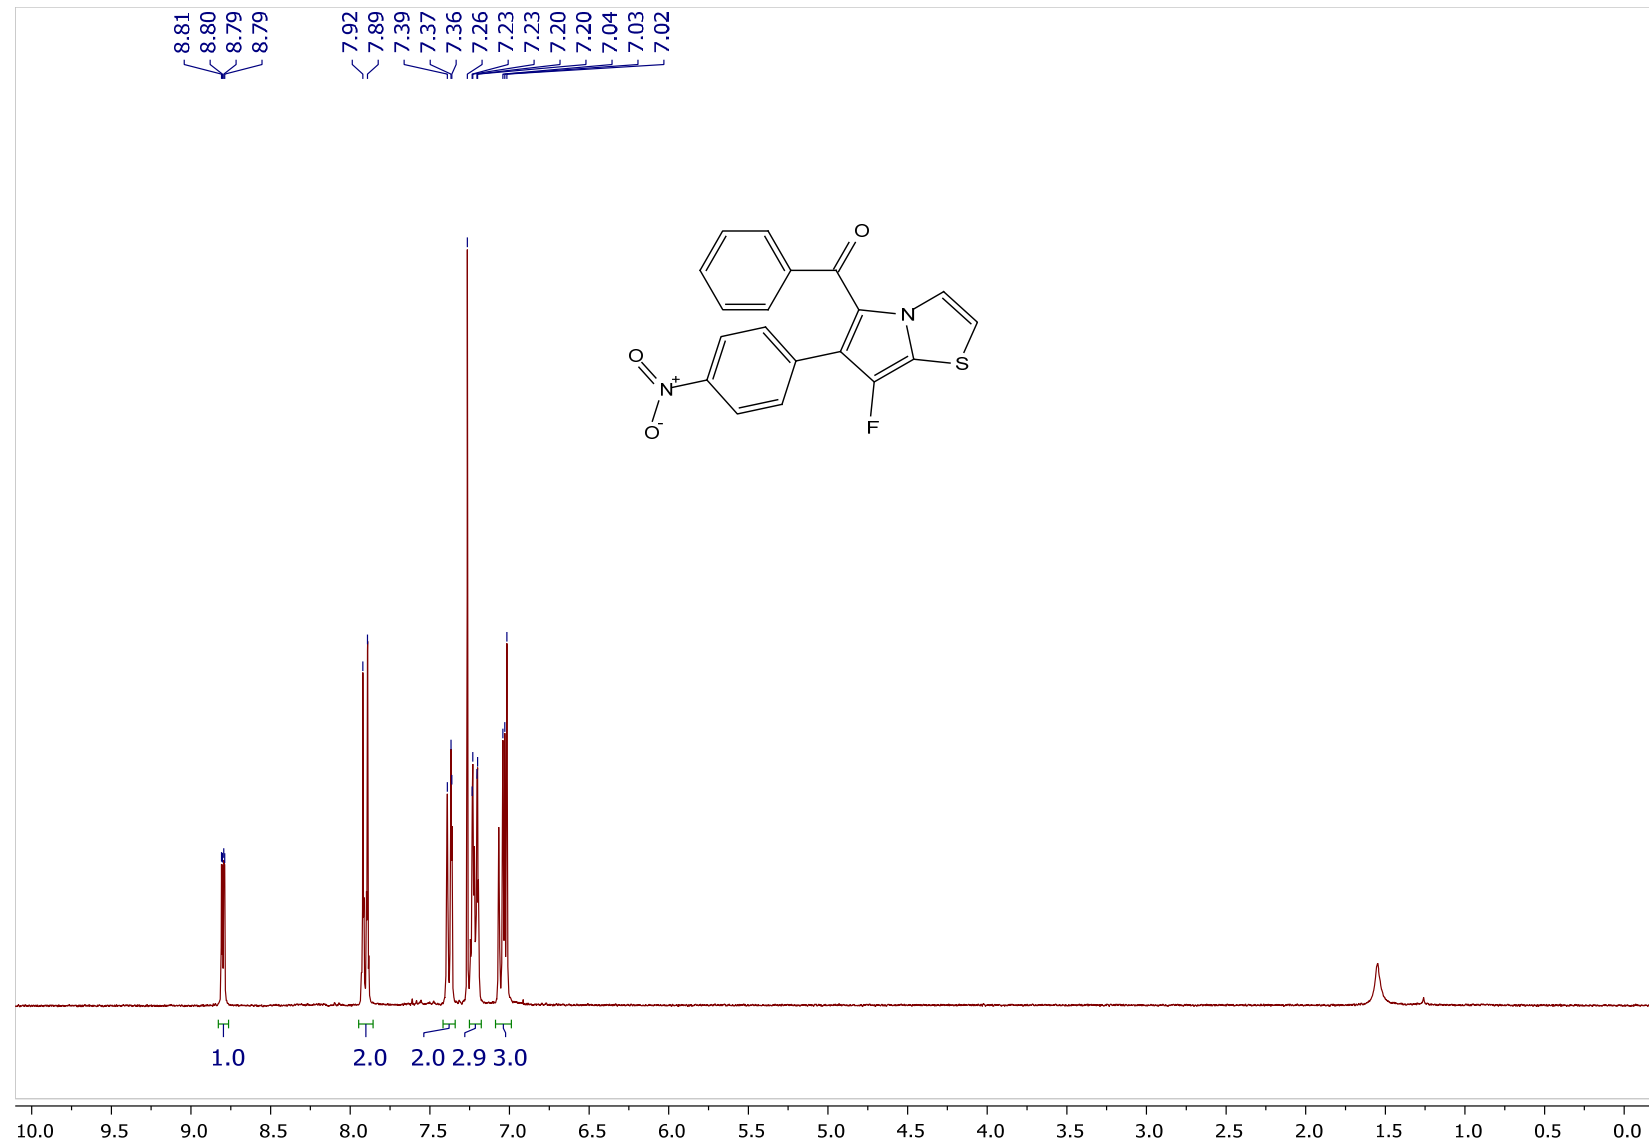

$^{13}\text{C}$  NMR

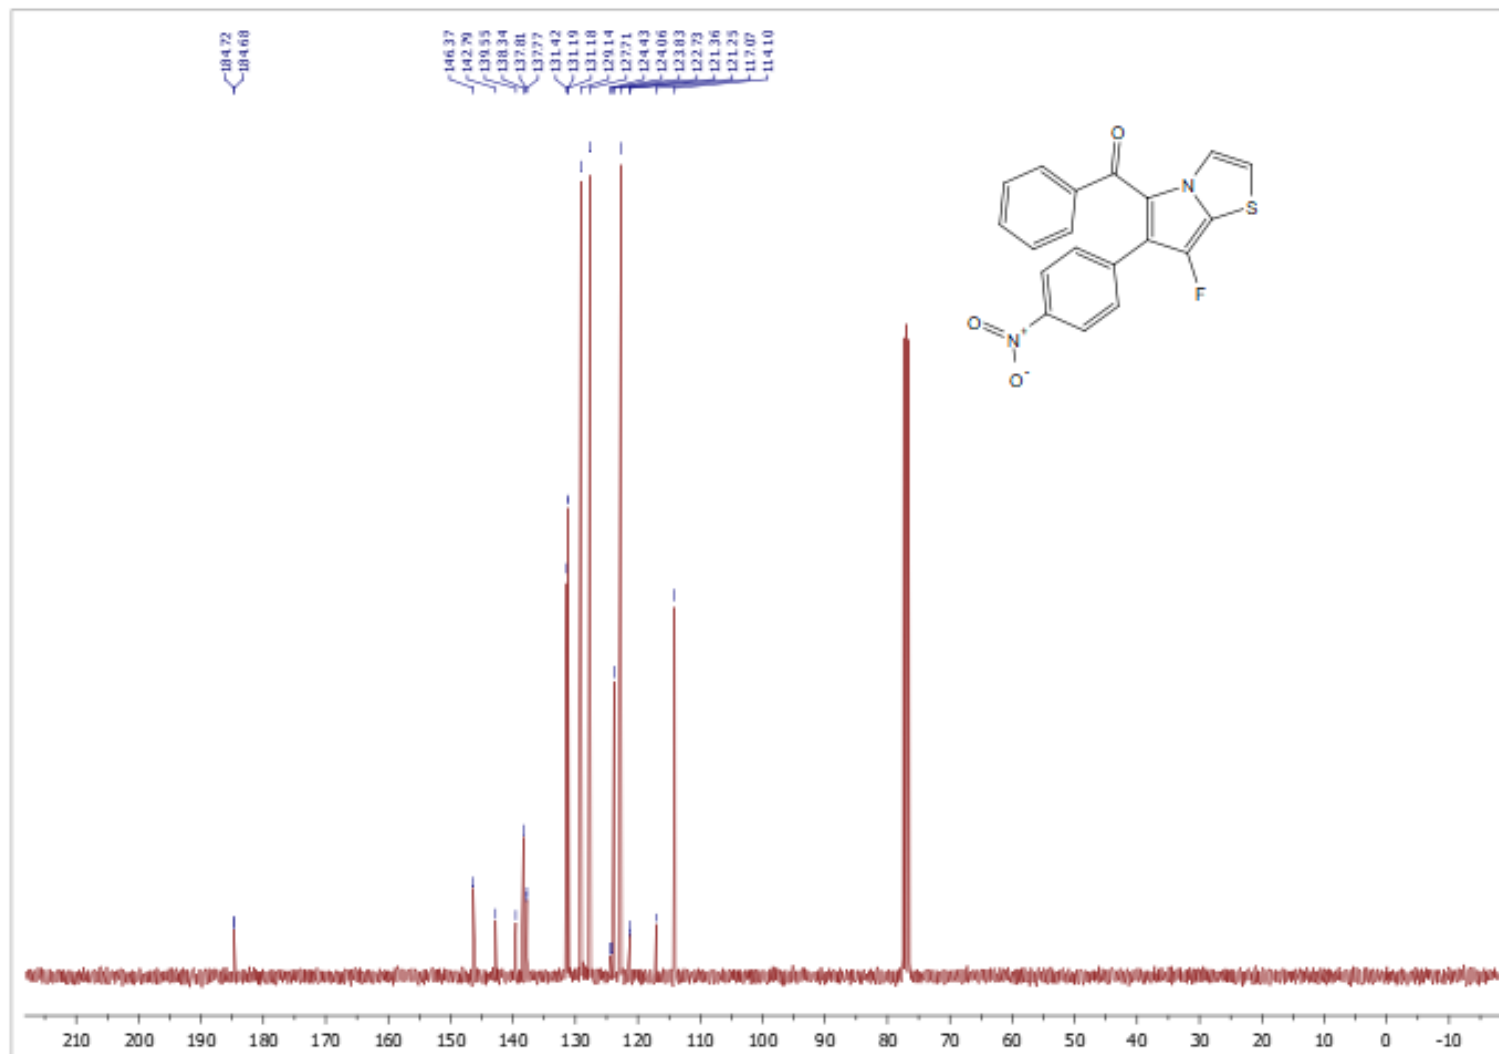

$^1\text{H}$ - $^1\text{H}$  COSY

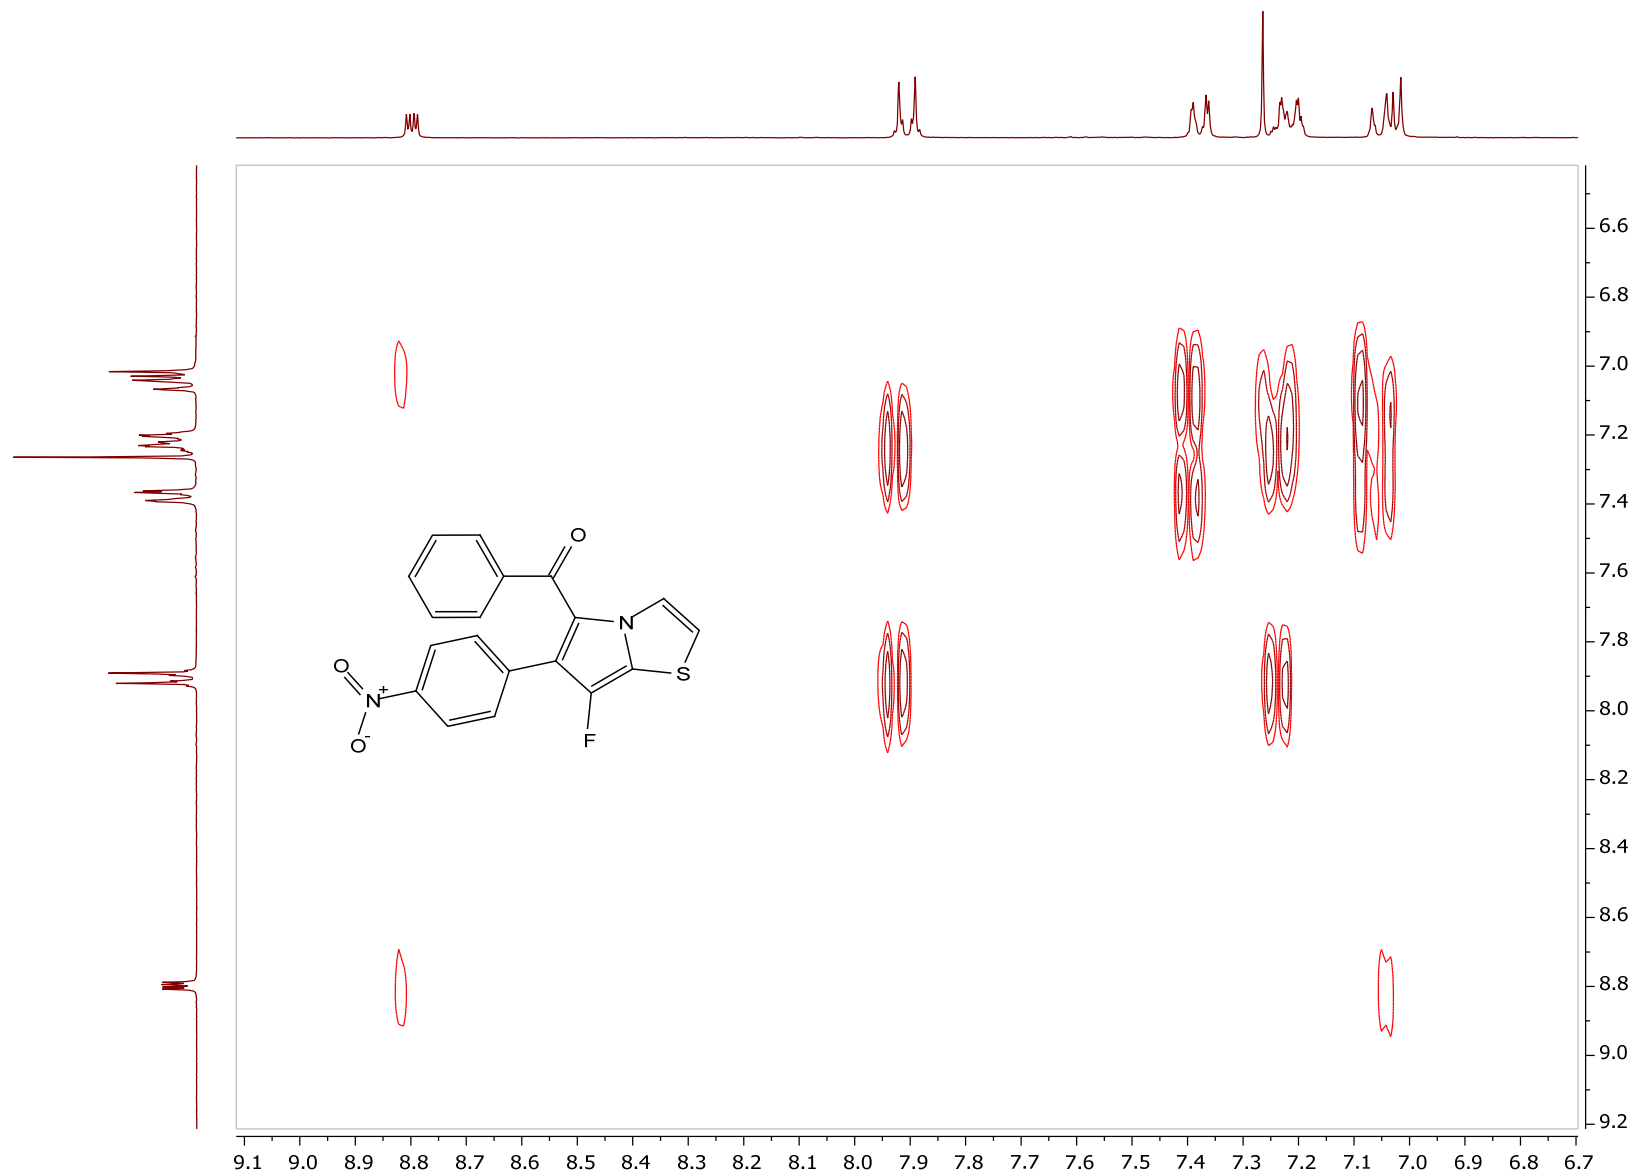

$^{19}\text{F}$  NMR

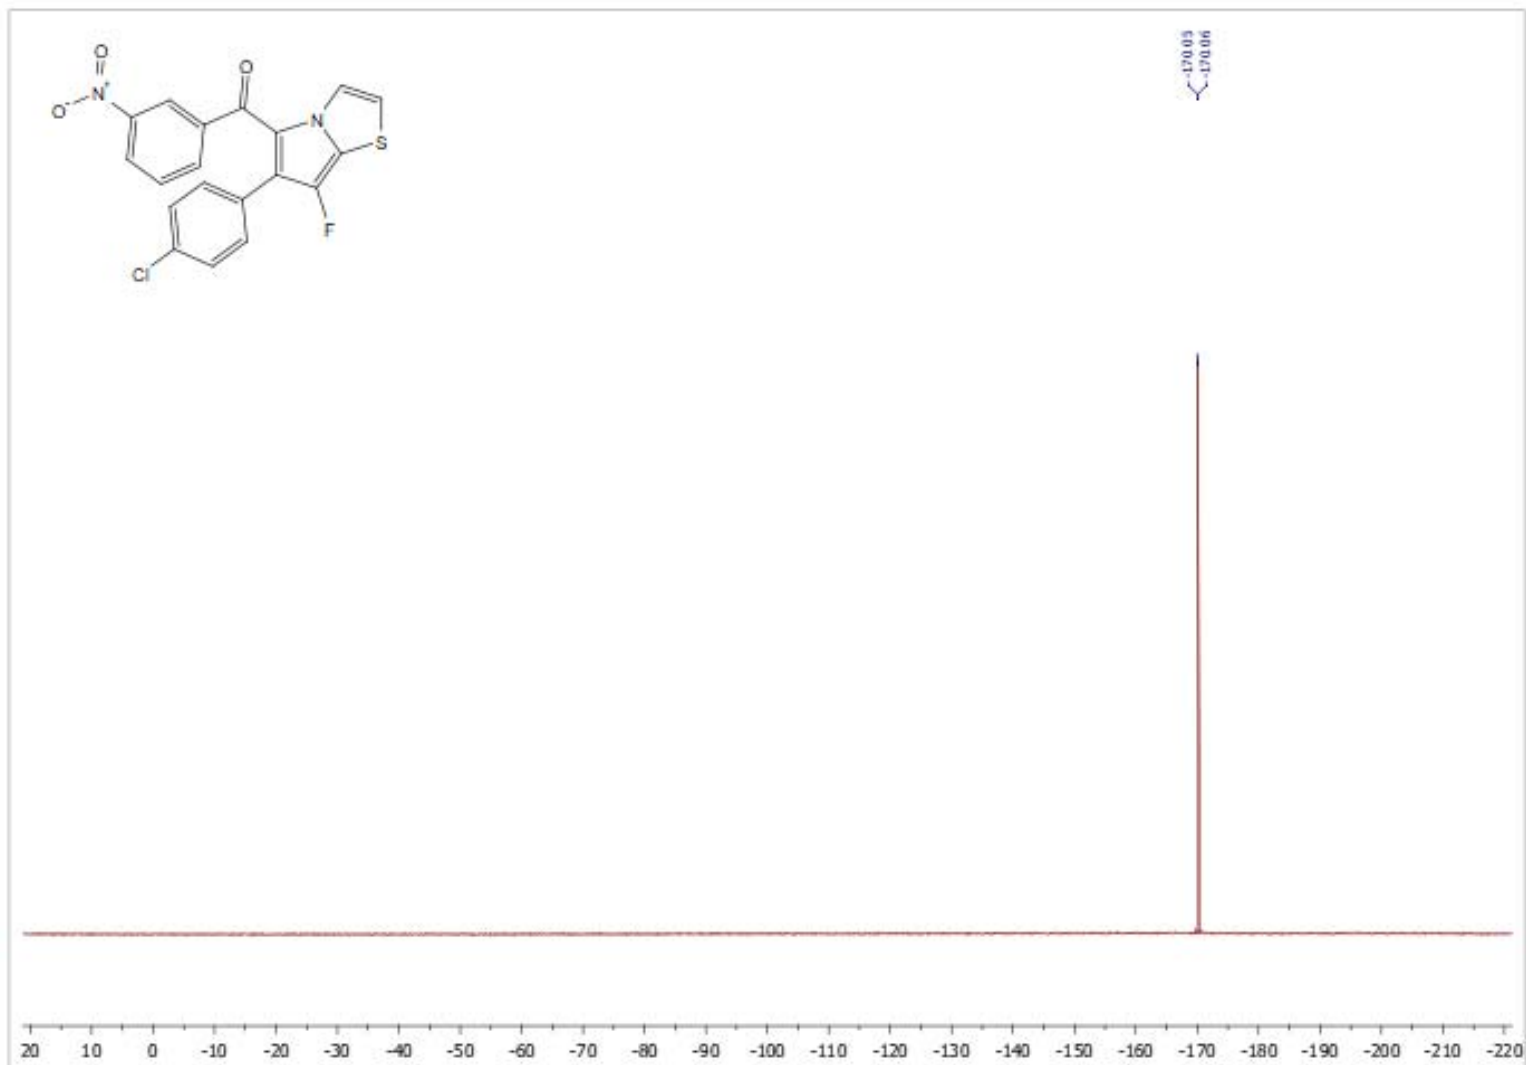

[6-(4-chlorophenyl)-7-fluoropyrrolo[2,1-*b*][1,3]thiazol-5-yl](3-methoxyphenyl)methanone **3e**

$^1\text{H}$  NMR

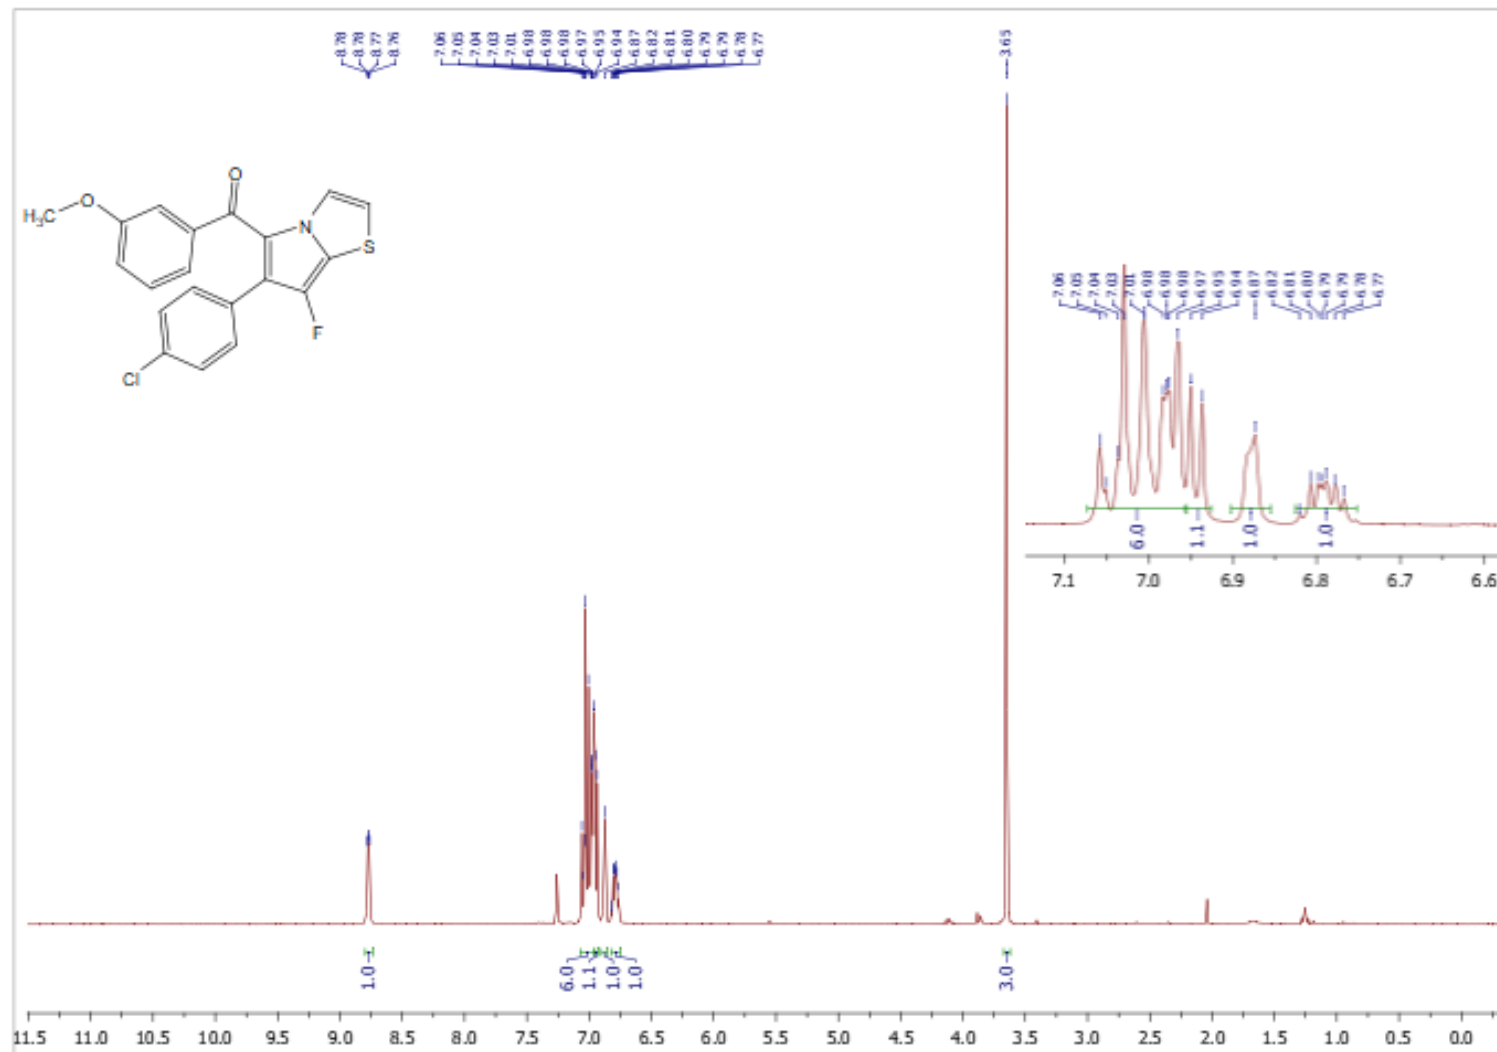

$^{13}\text{C}$  NMR

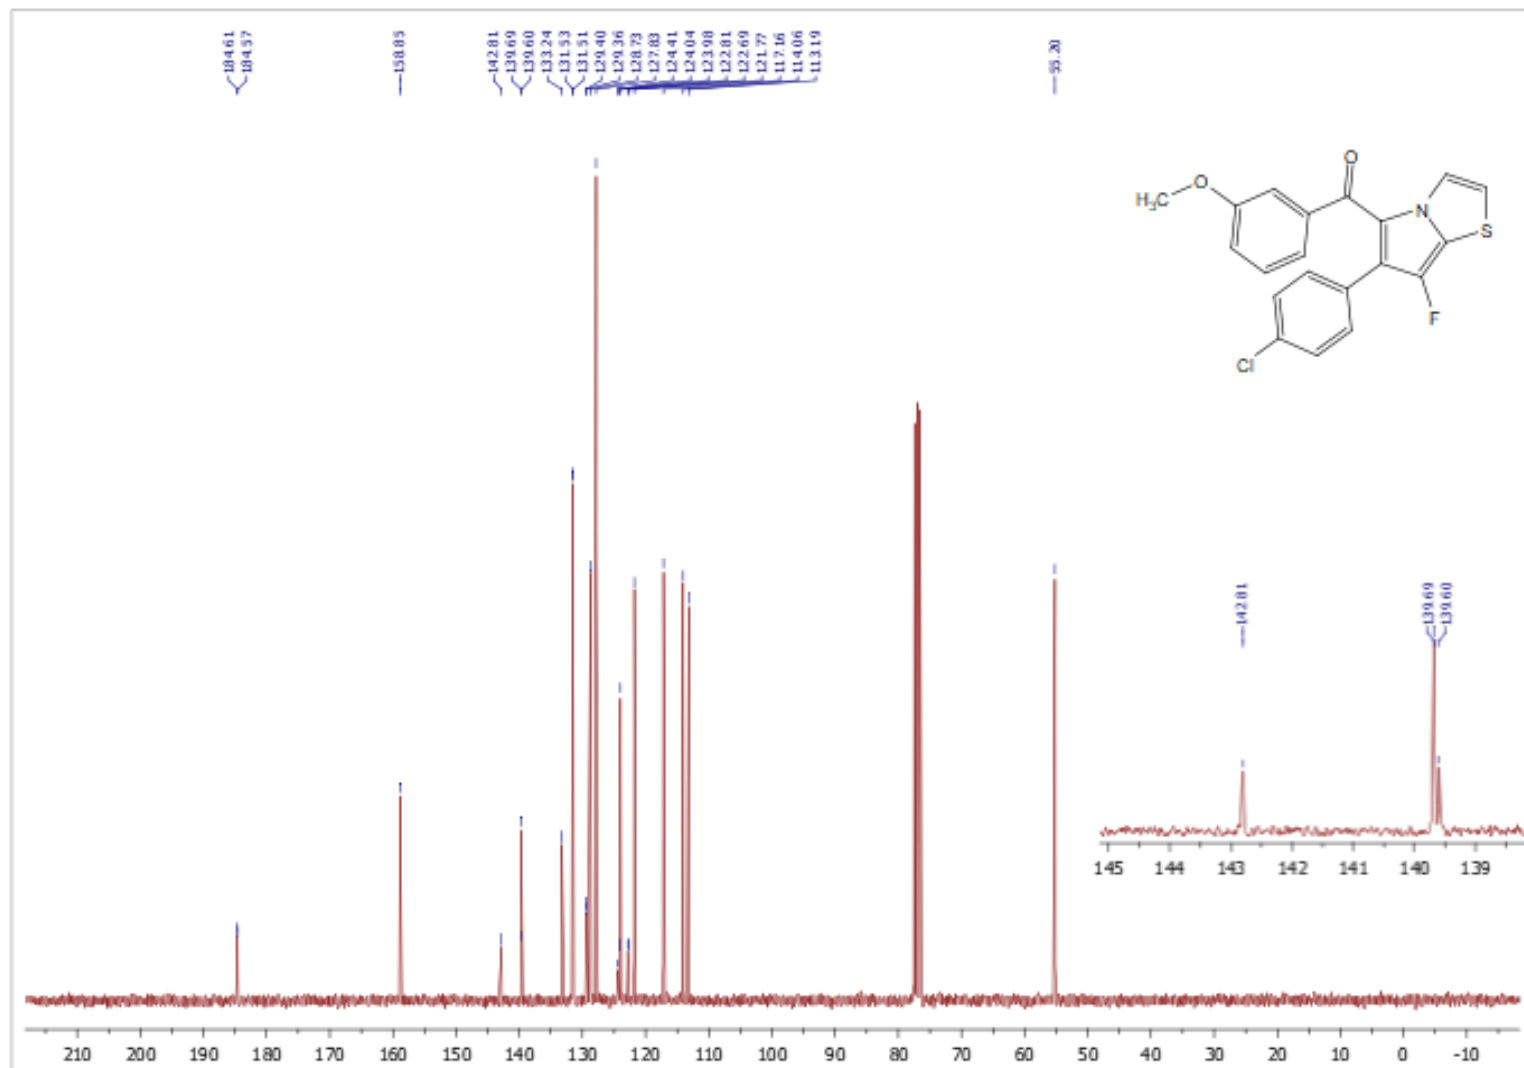

$^{19}\text{F}$  NMR

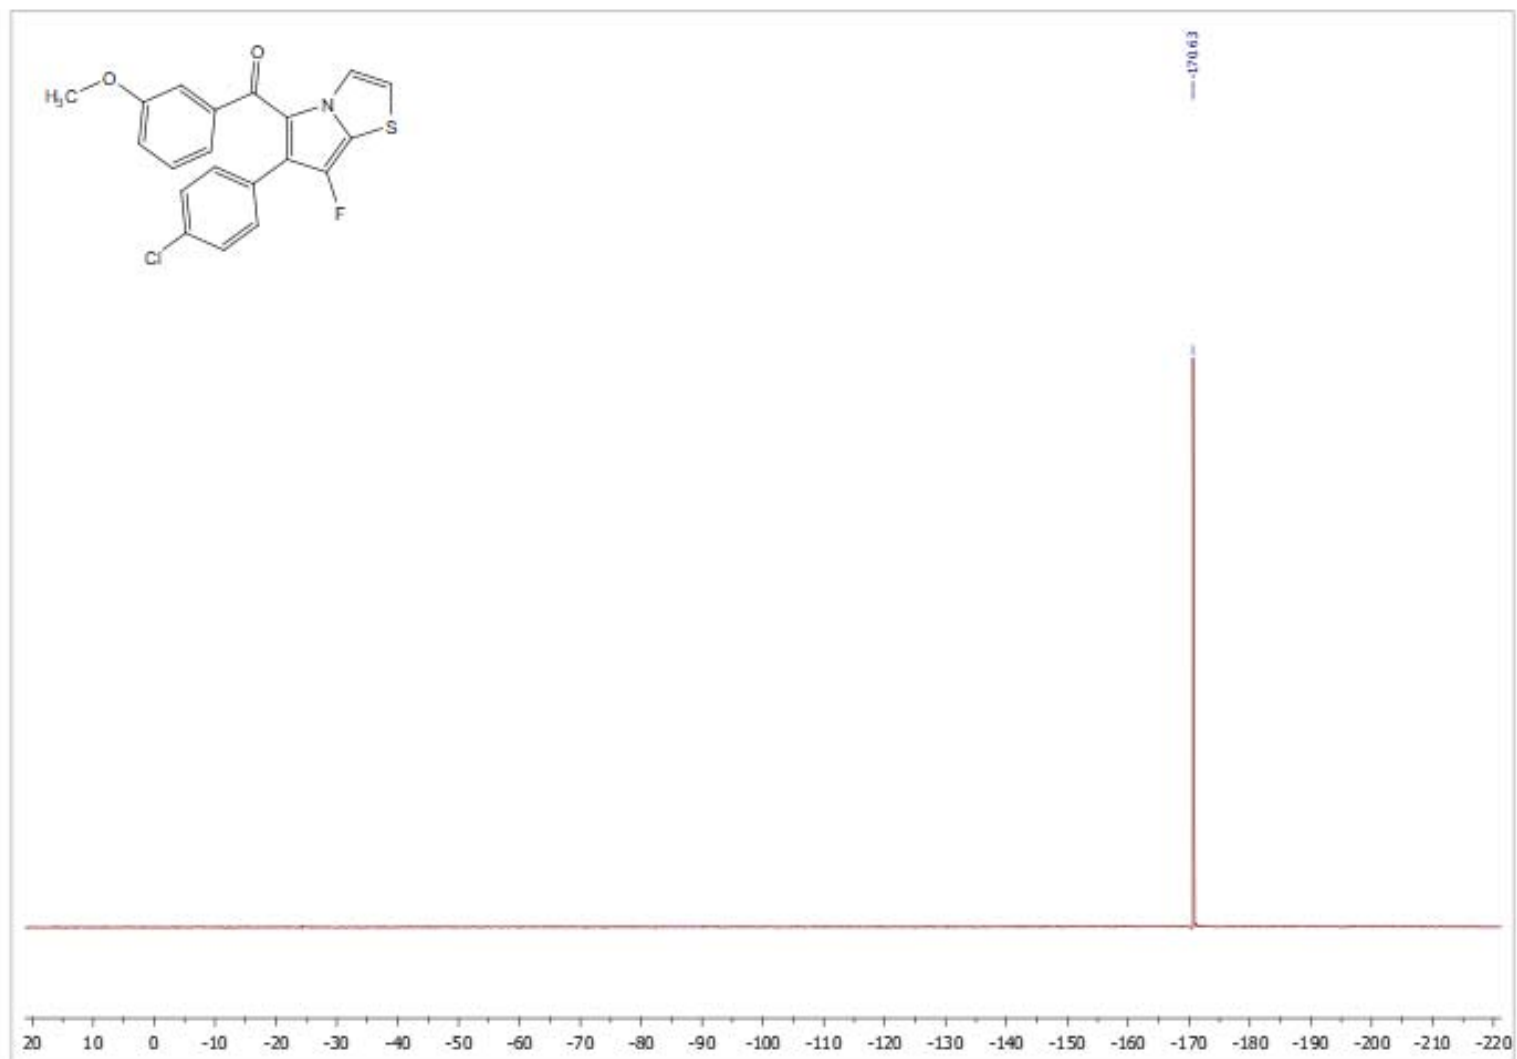

[6-(4-chlorophenyl)-7-fluoropyrrolo[2,1-*b*][1,3]thiazol-5-yl](3-nitrophenyl)methanone **3f**

<sup>1</sup>H NMR

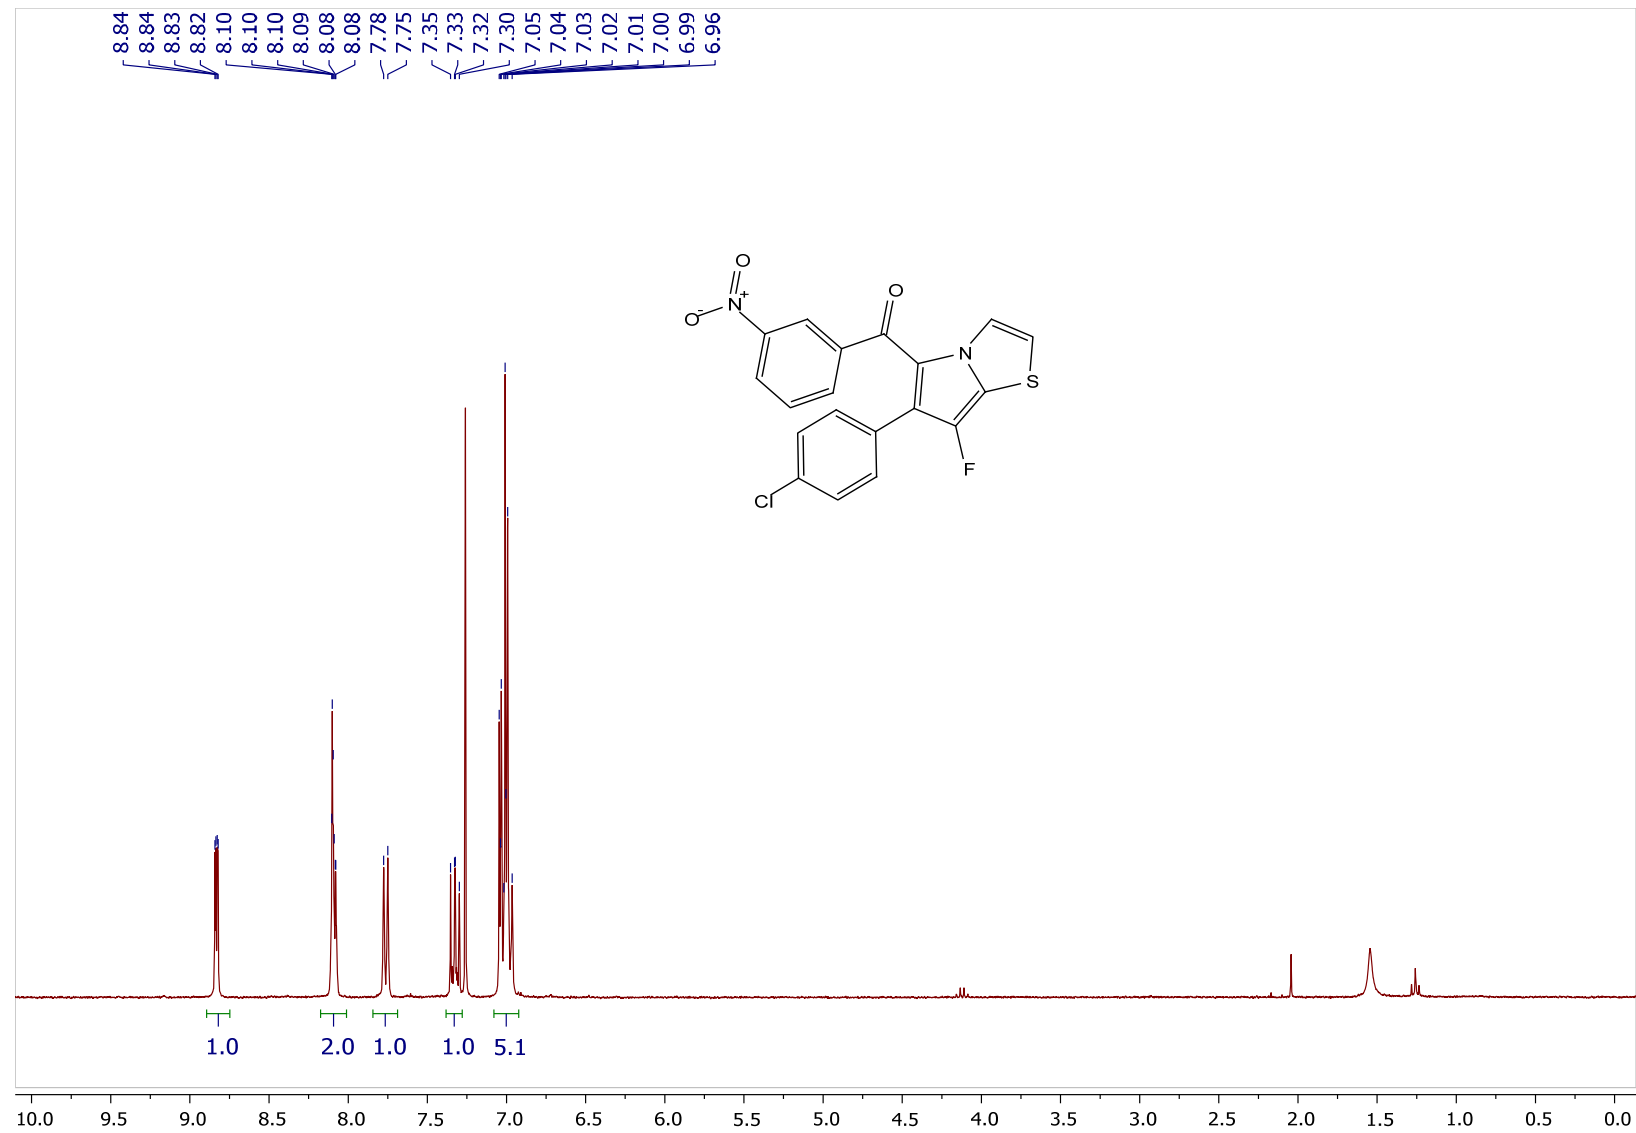



$^{13}\text{C}$  NMR

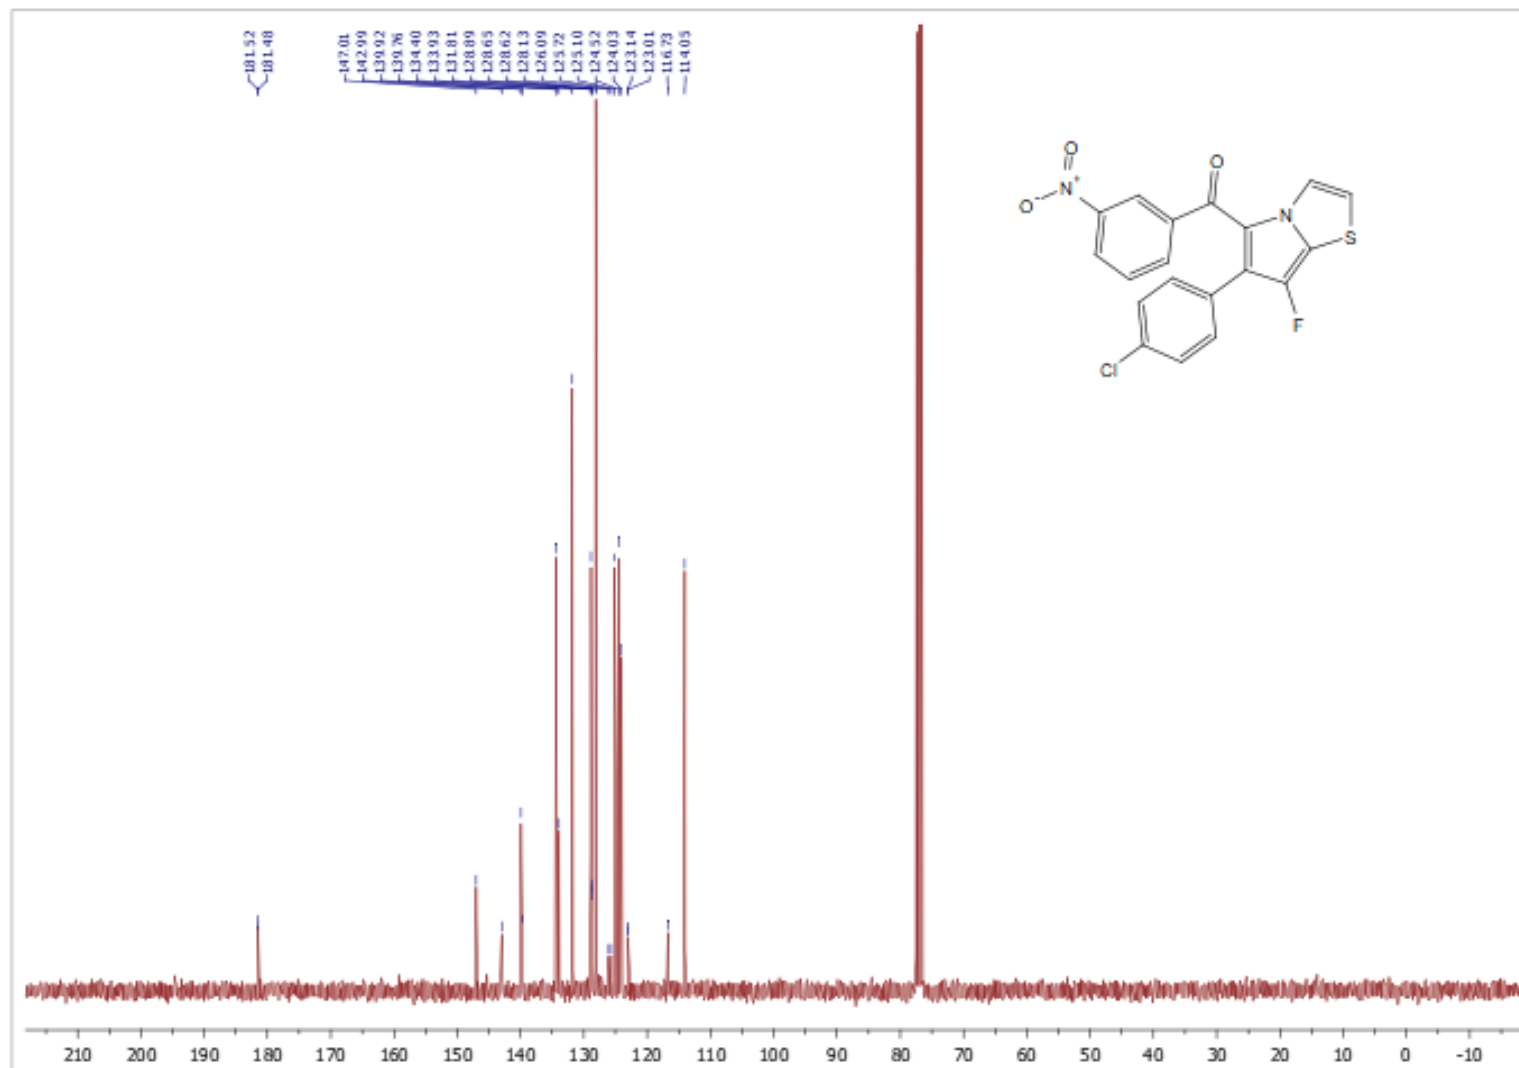

$^{19}\text{F}$  NMR

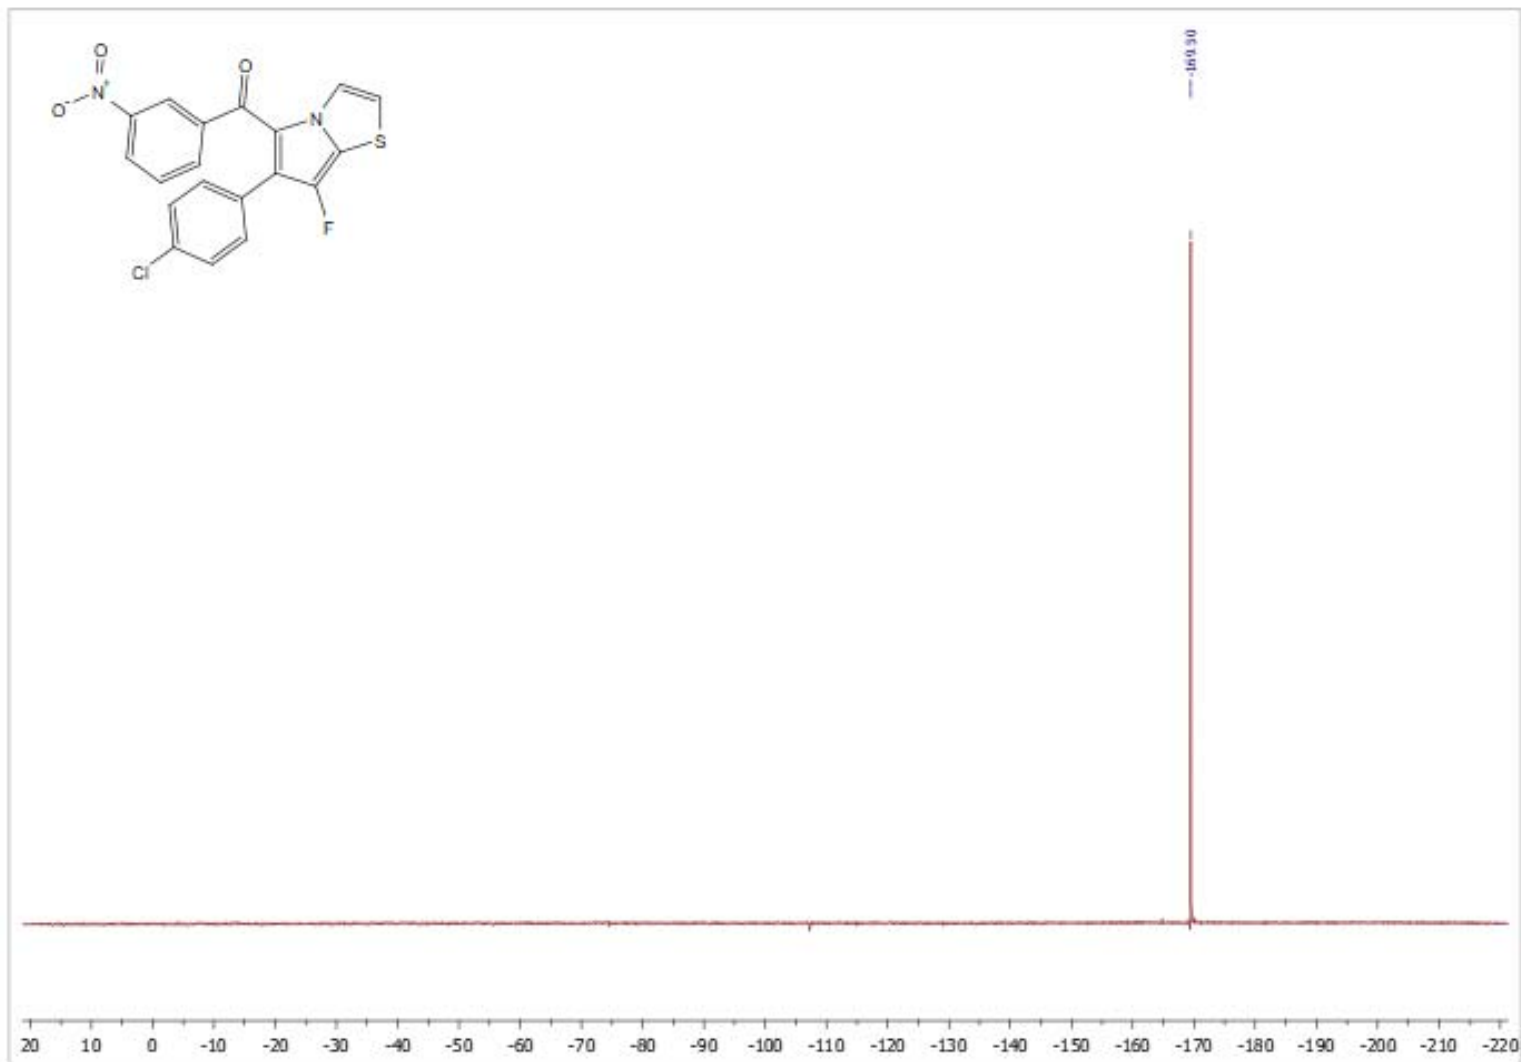

ethyl 6-(4-chlorophenyl)-7-fluoropyrrolo[2,1-b][1,3]thiazole-5-carboxylate **3g**

$^1\text{H}$  NMR

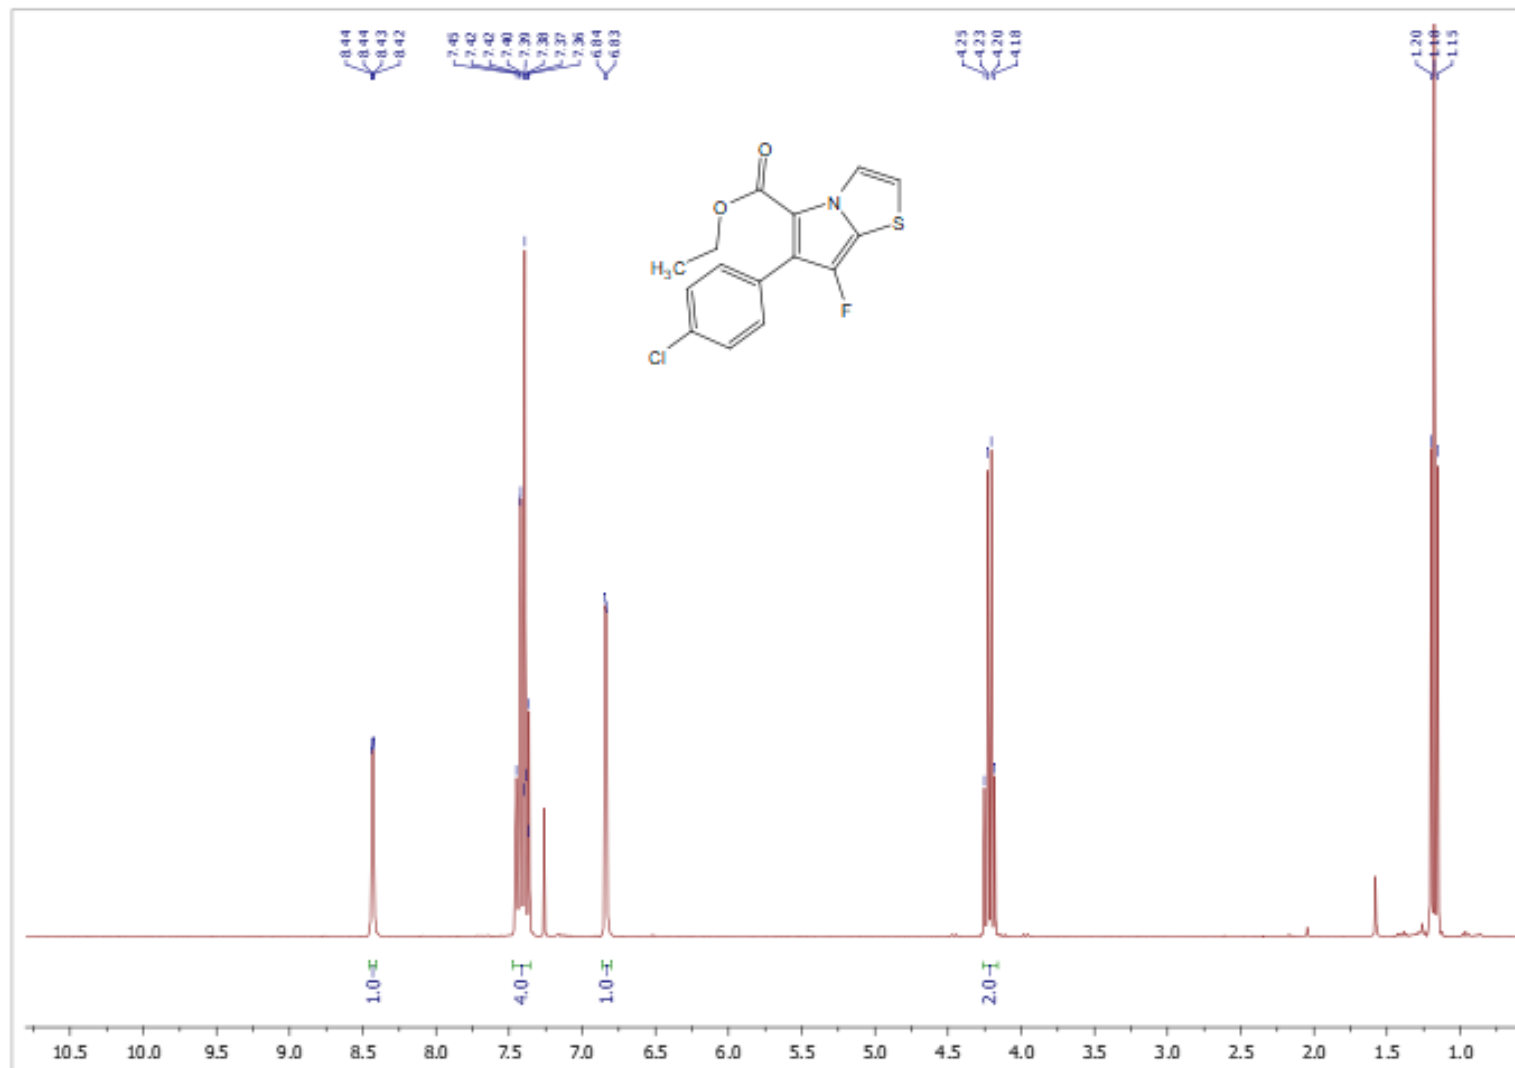

$^{13}\text{C}$  NMR

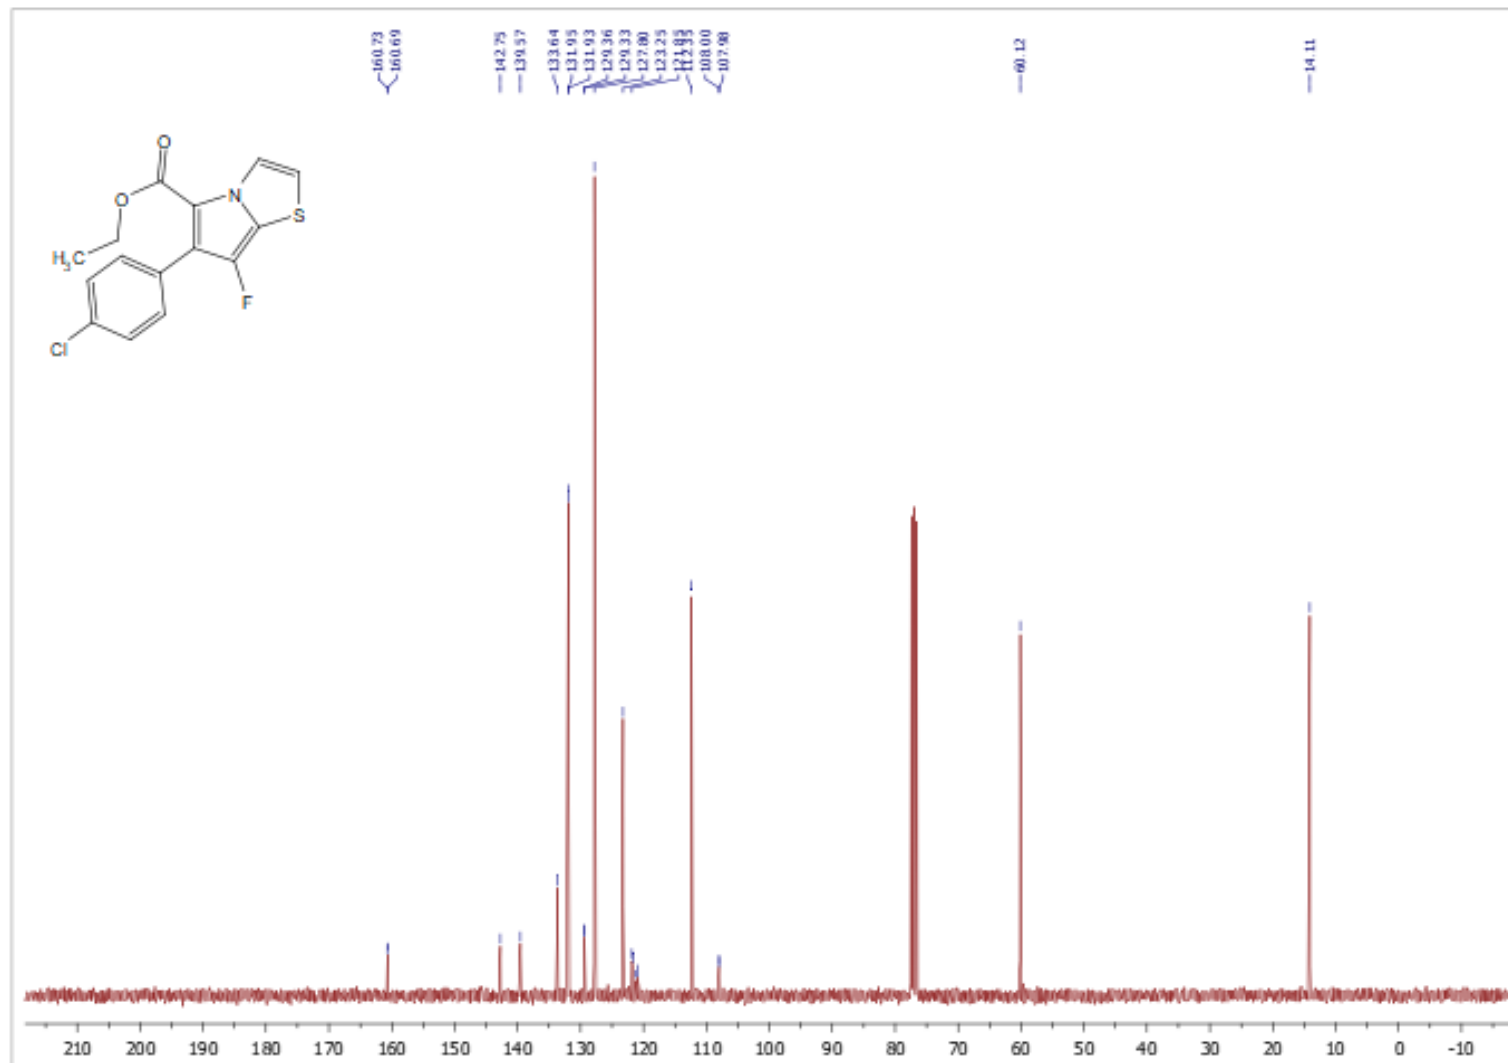

$^{19}\text{F}$  NMR

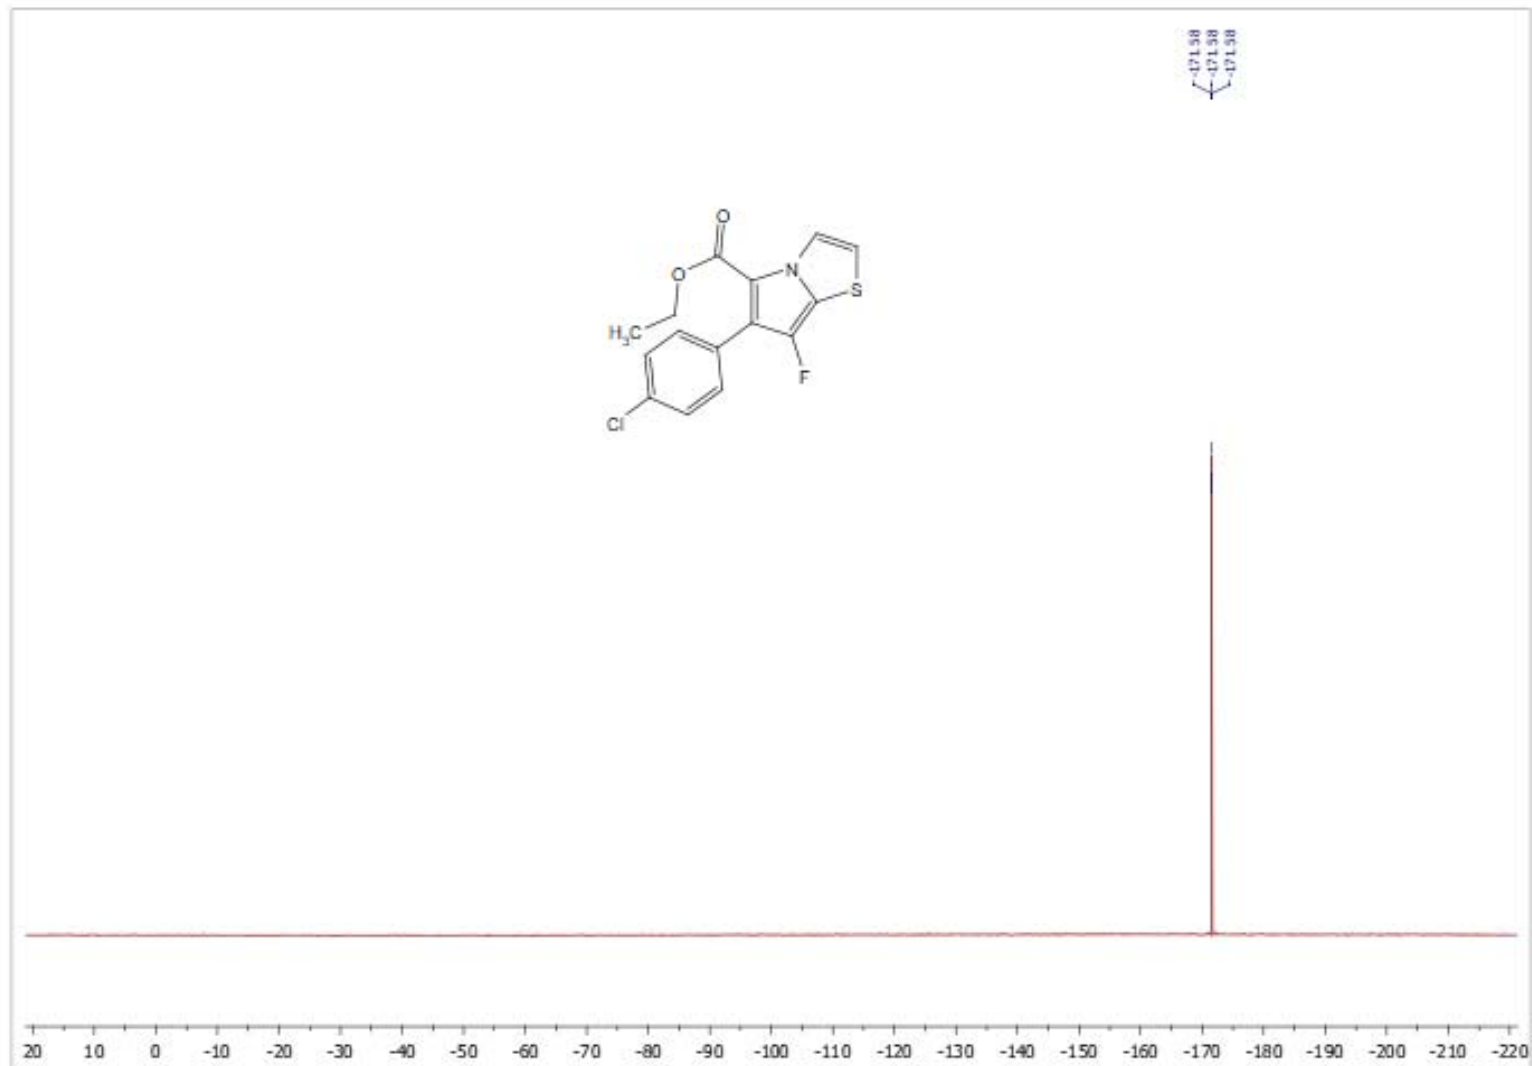

benzyl 6-(4-chlorophenyl)-7-fluoropyrrolo[2,1-*b*][1,3]thiazole-5-carboxylate **3h**

$^1\text{H}$  NMR

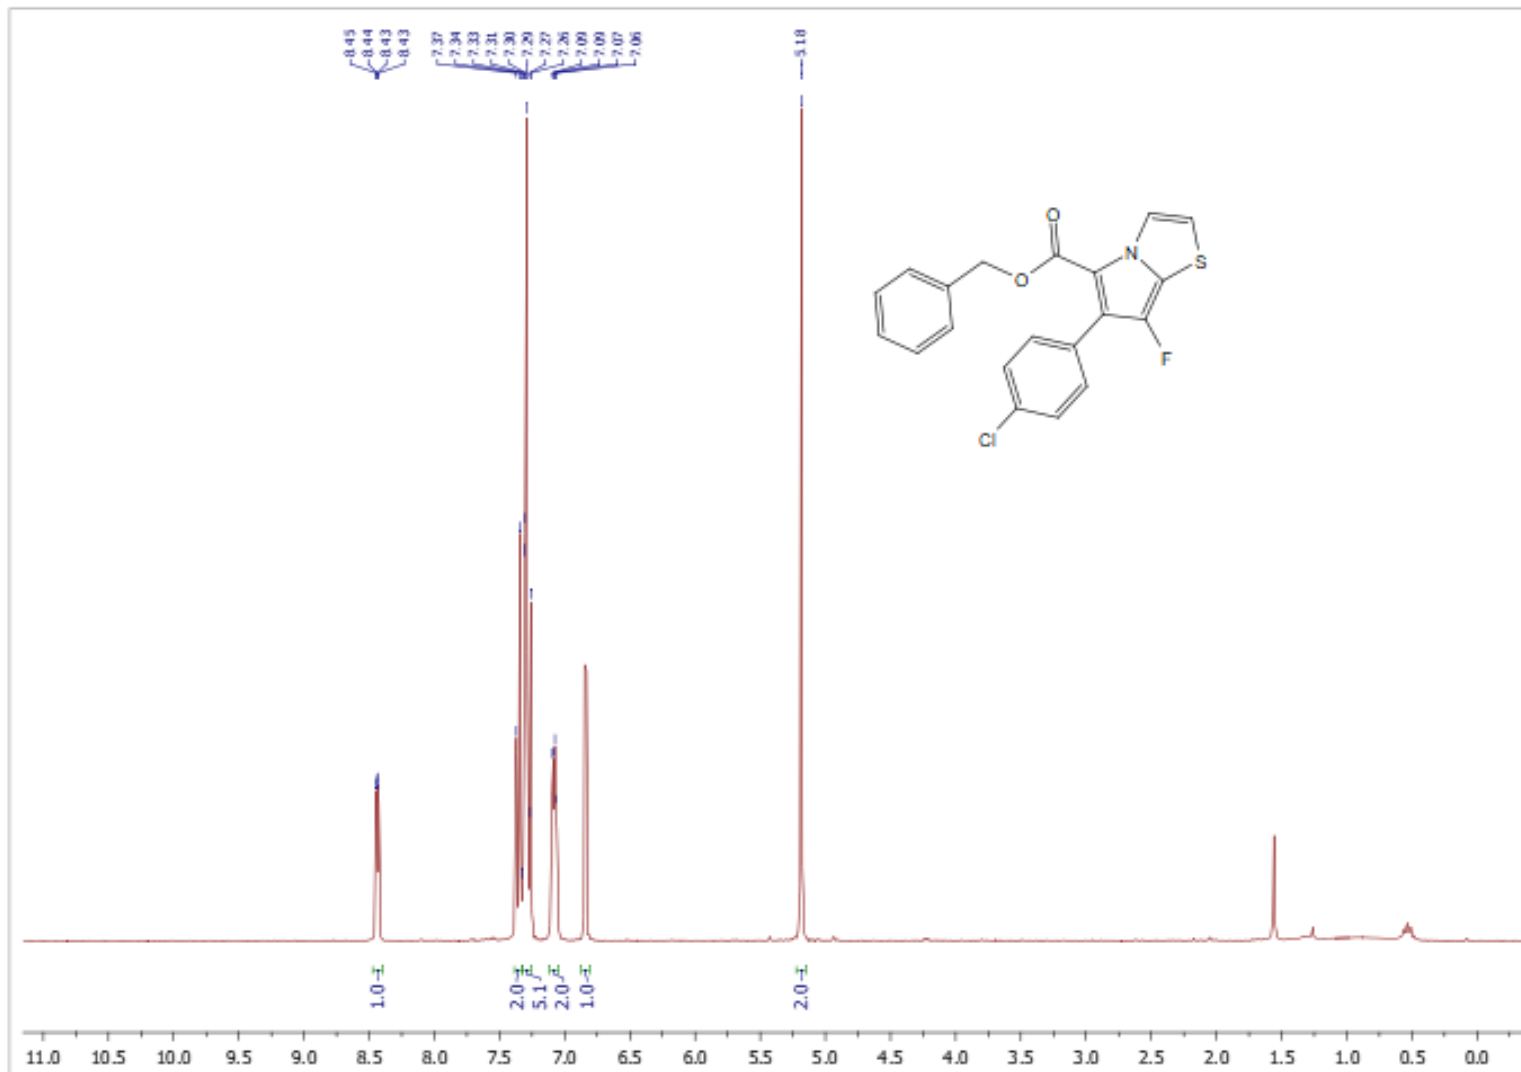

$^{13}\text{C}$  NMR

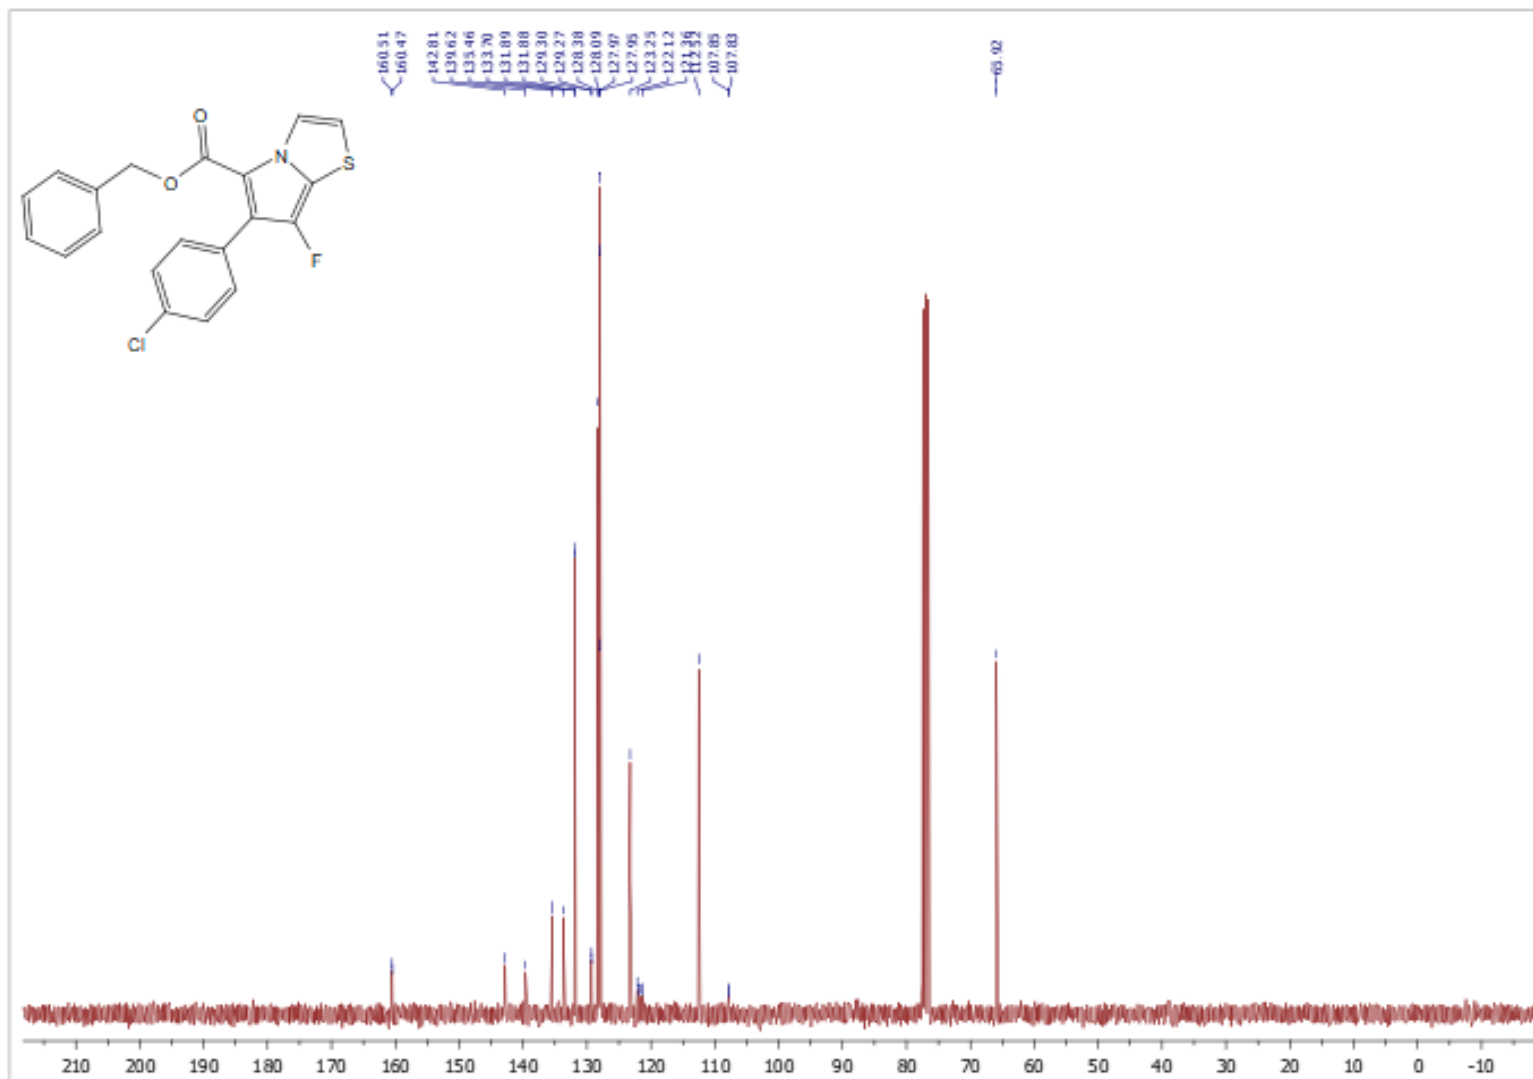

$^{19}\text{F}$  NMR

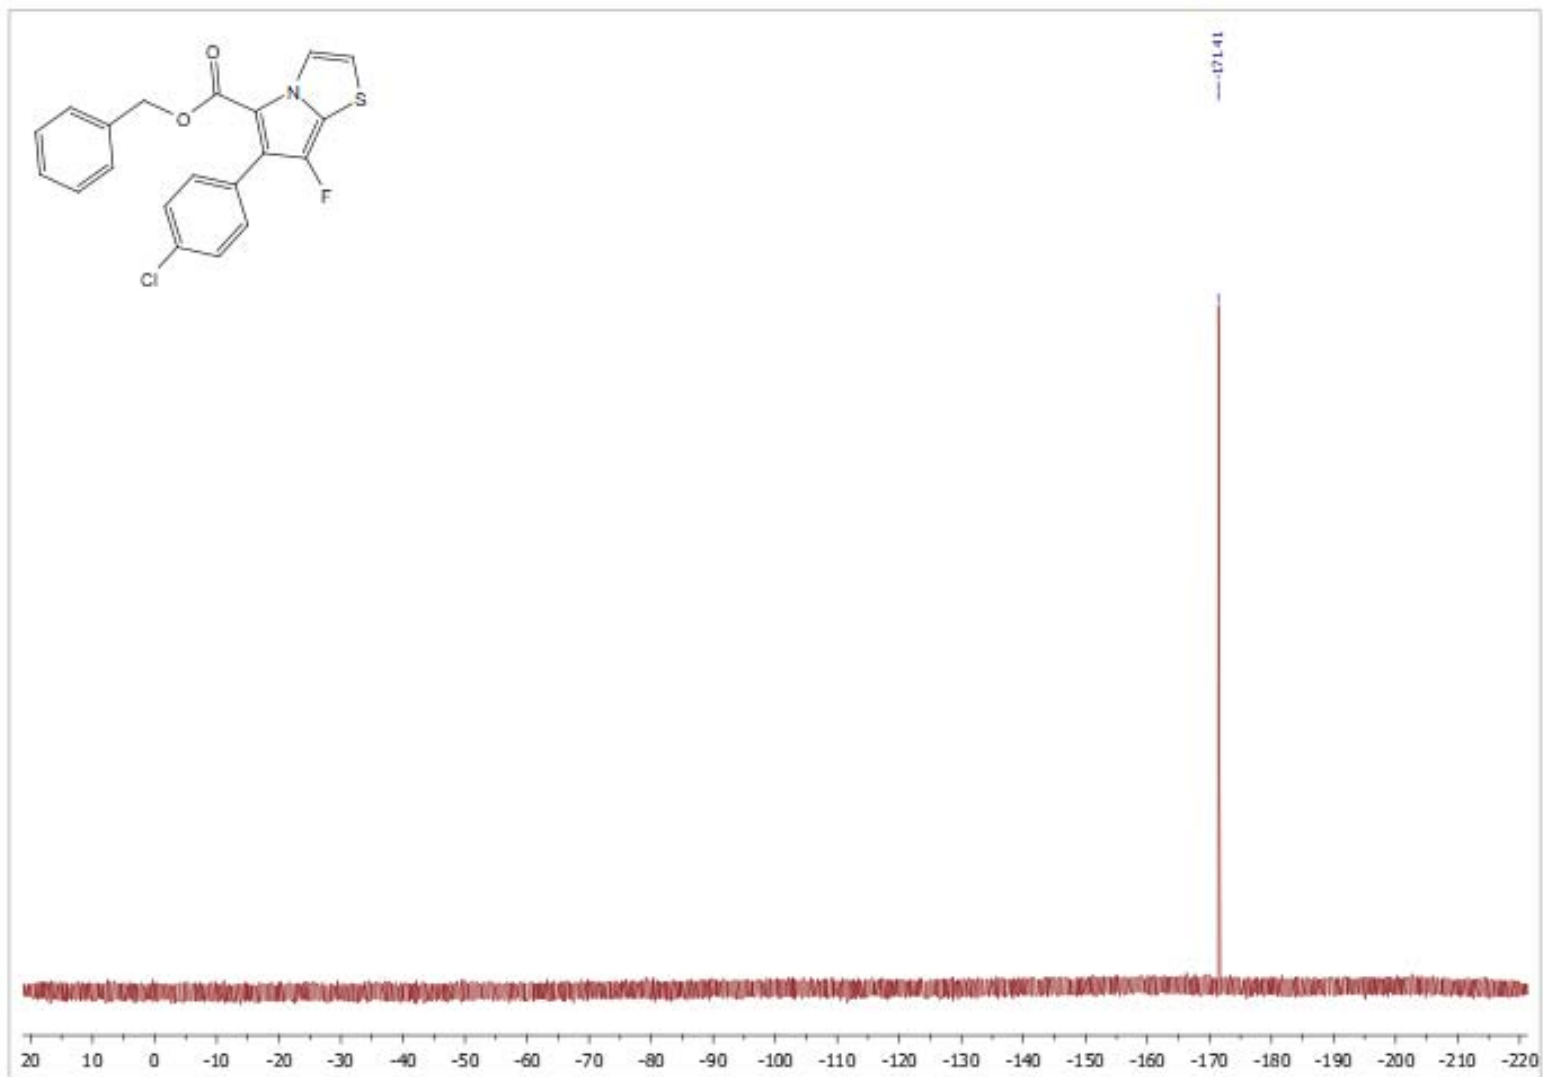



1-[6-(4-chlorophenyl)-7-fluoropyrrolo[2,1-*b*][1,3]thiazol-5-yl]ethan-1-one **3i**

<sup>1</sup>H NMR

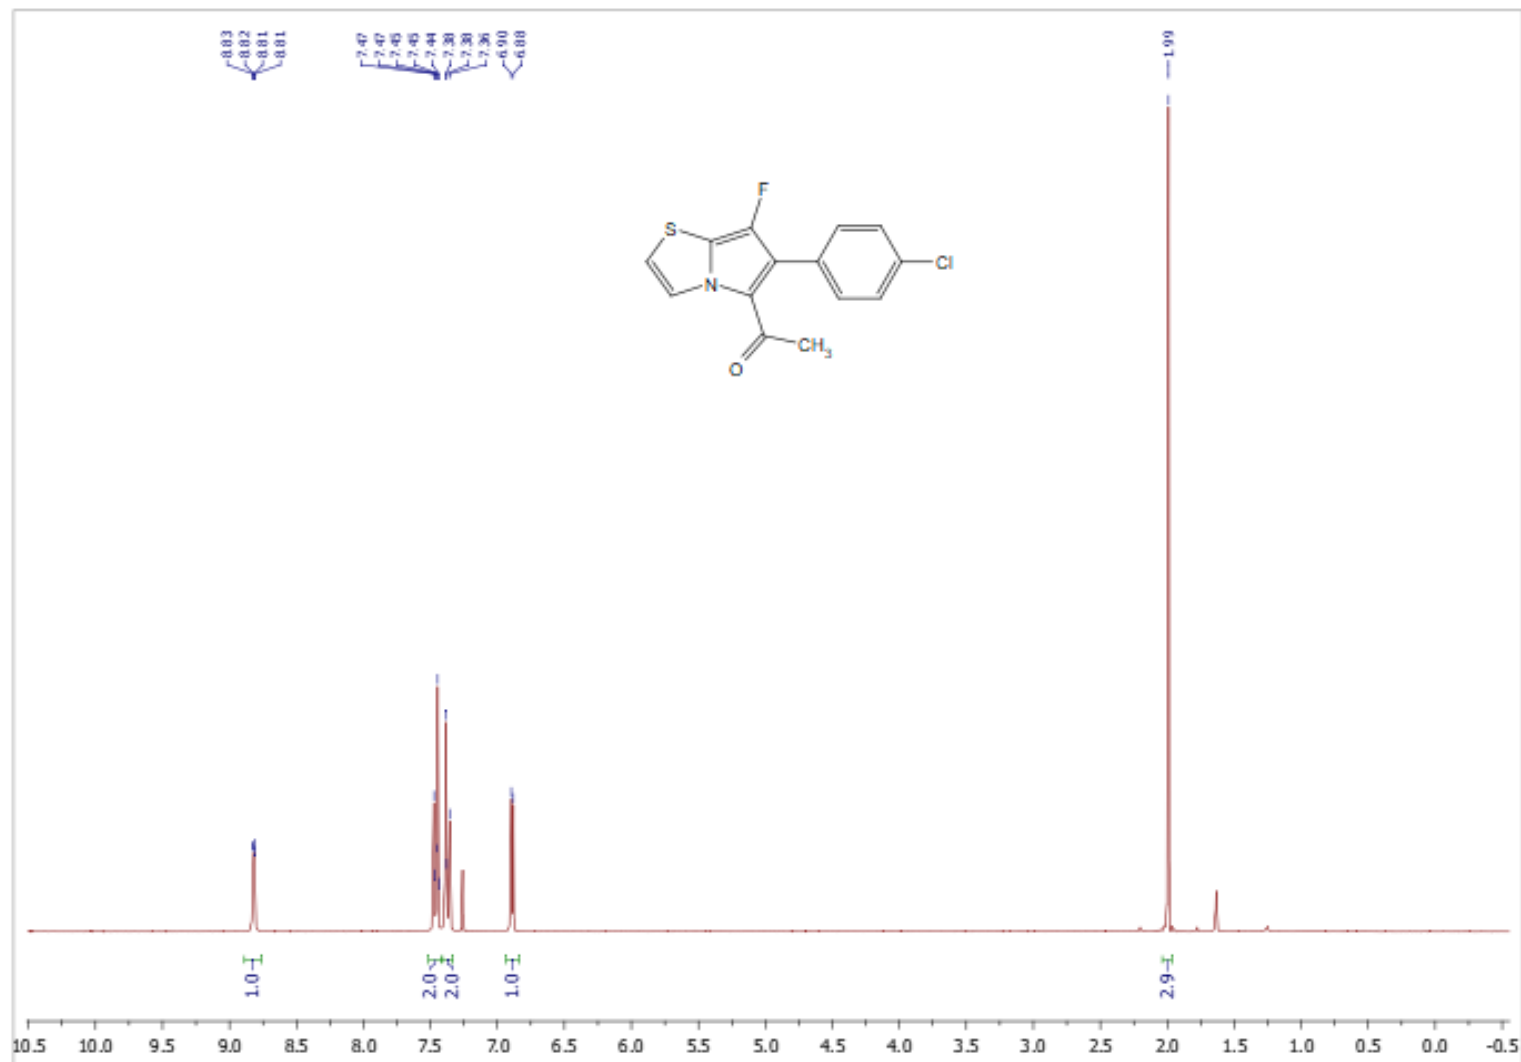

$^{13}\text{C}$  NMR

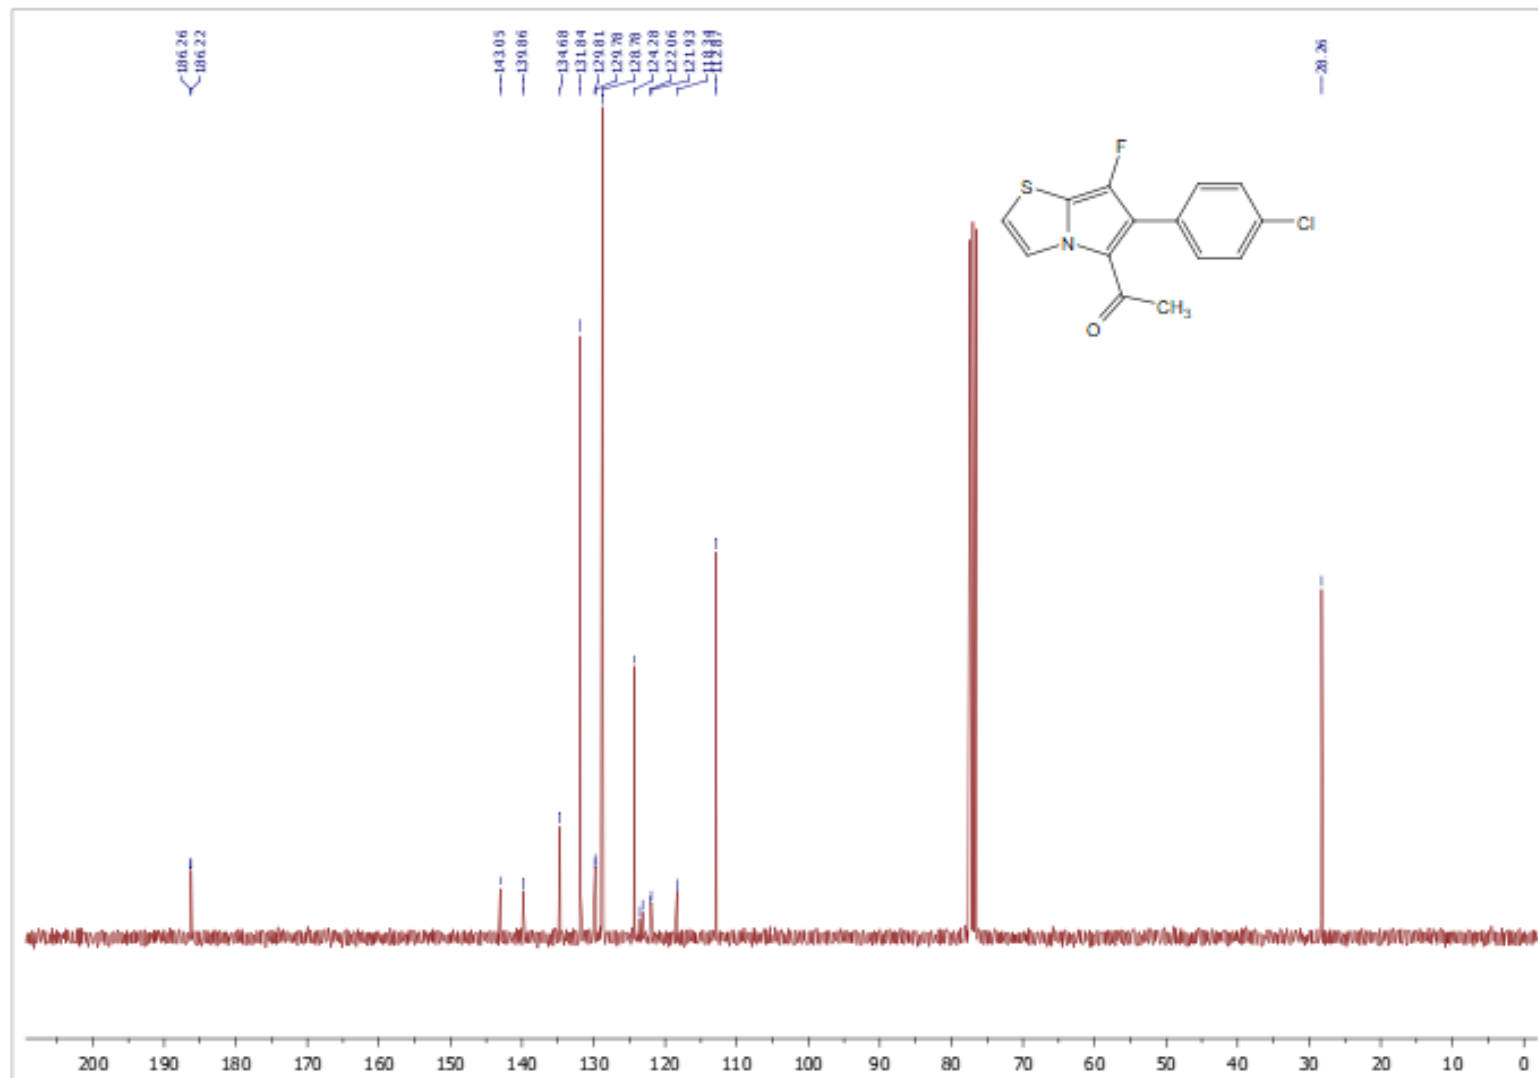

$^{19}\text{F}$  NMR

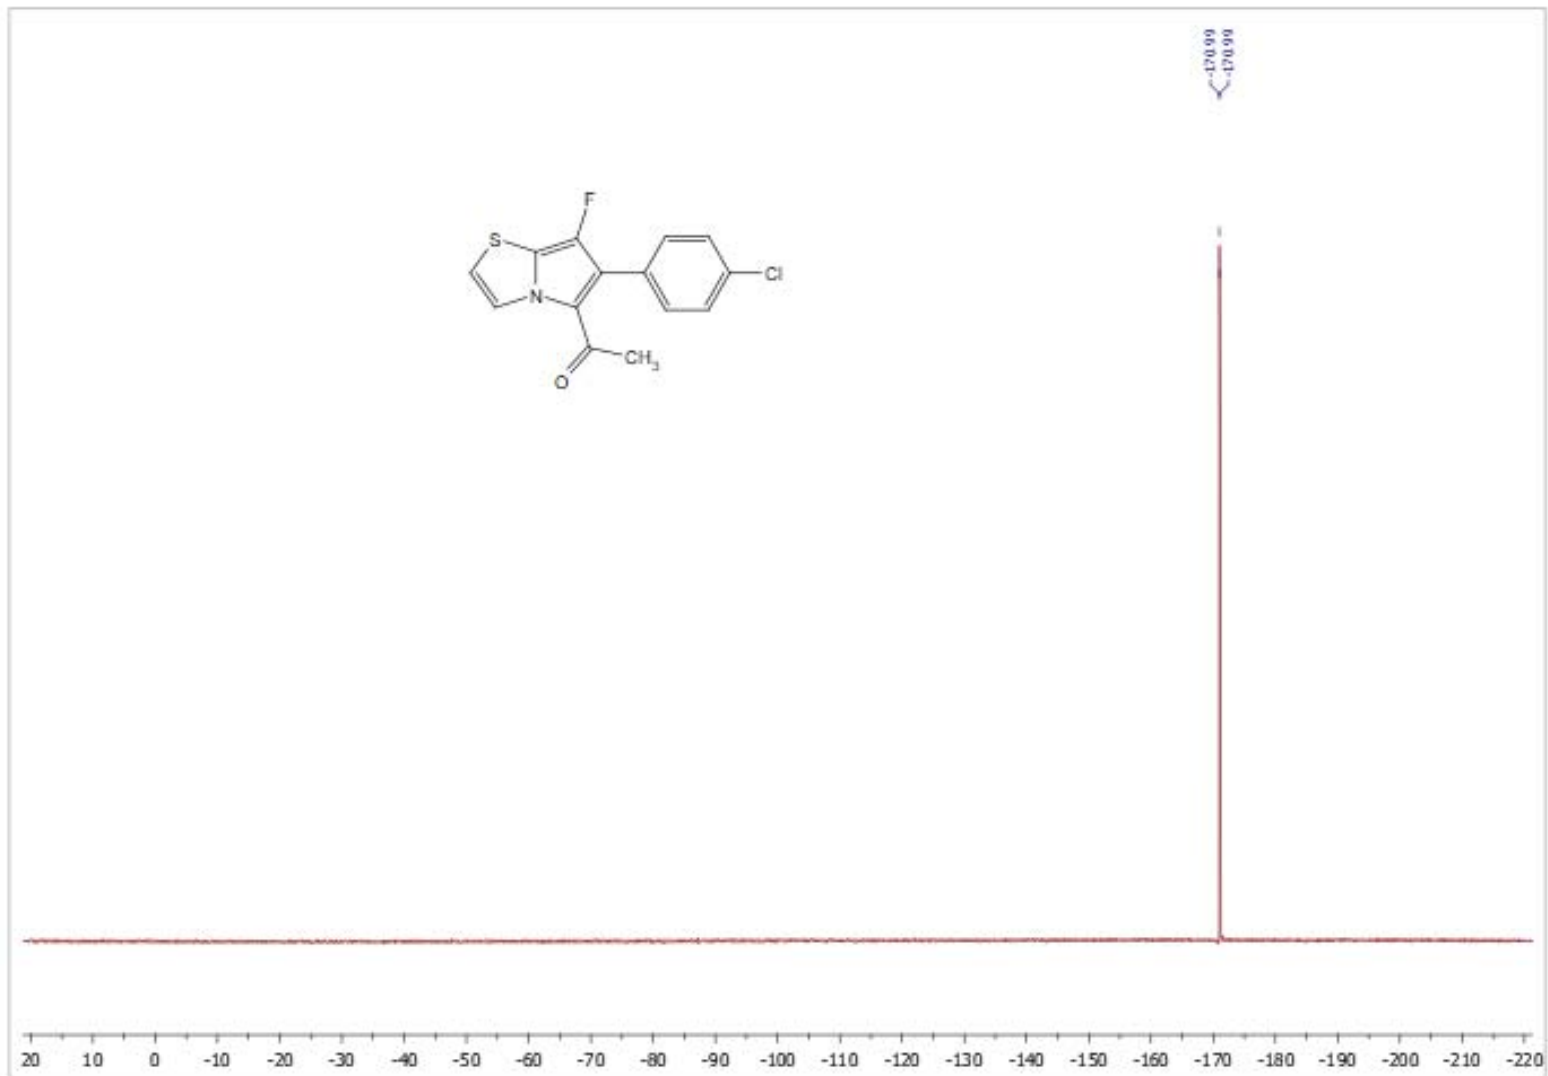

ethyl 5-benzoyl-6-(4-chlorophenyl)pyrrolo[2,1-*b*][1,3]thiazole-7-carboxylate **4a**

$^1\text{H}$  NMR

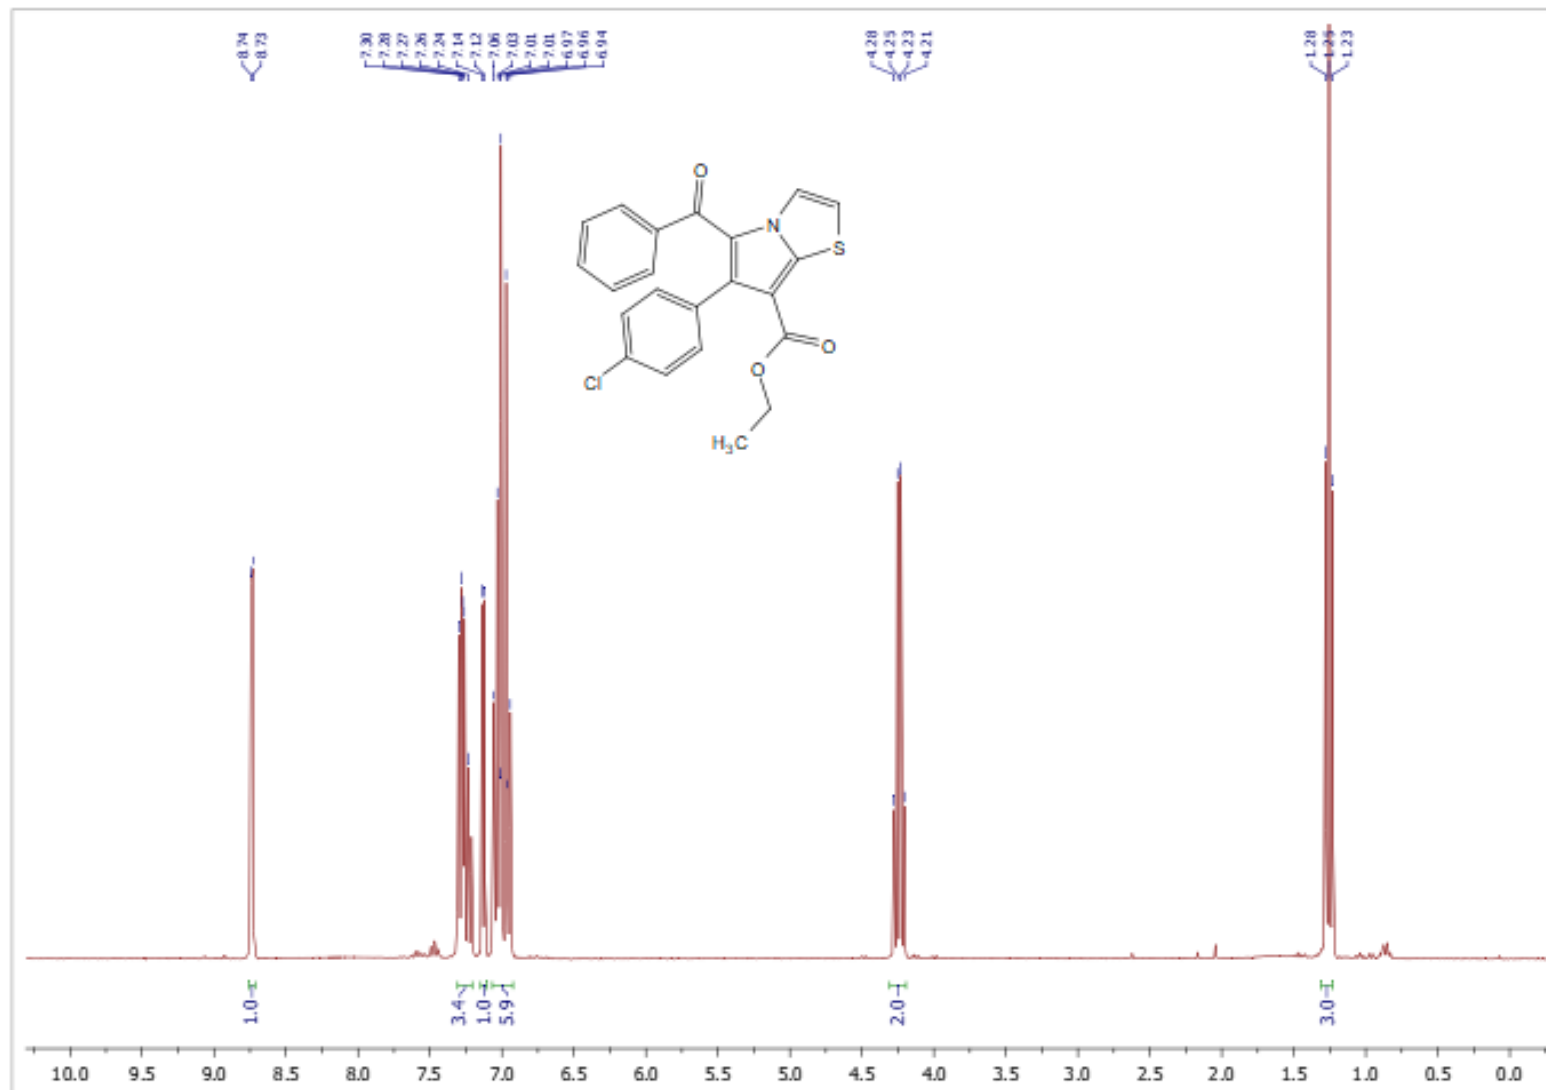

$^{13}\text{C}$  NMR

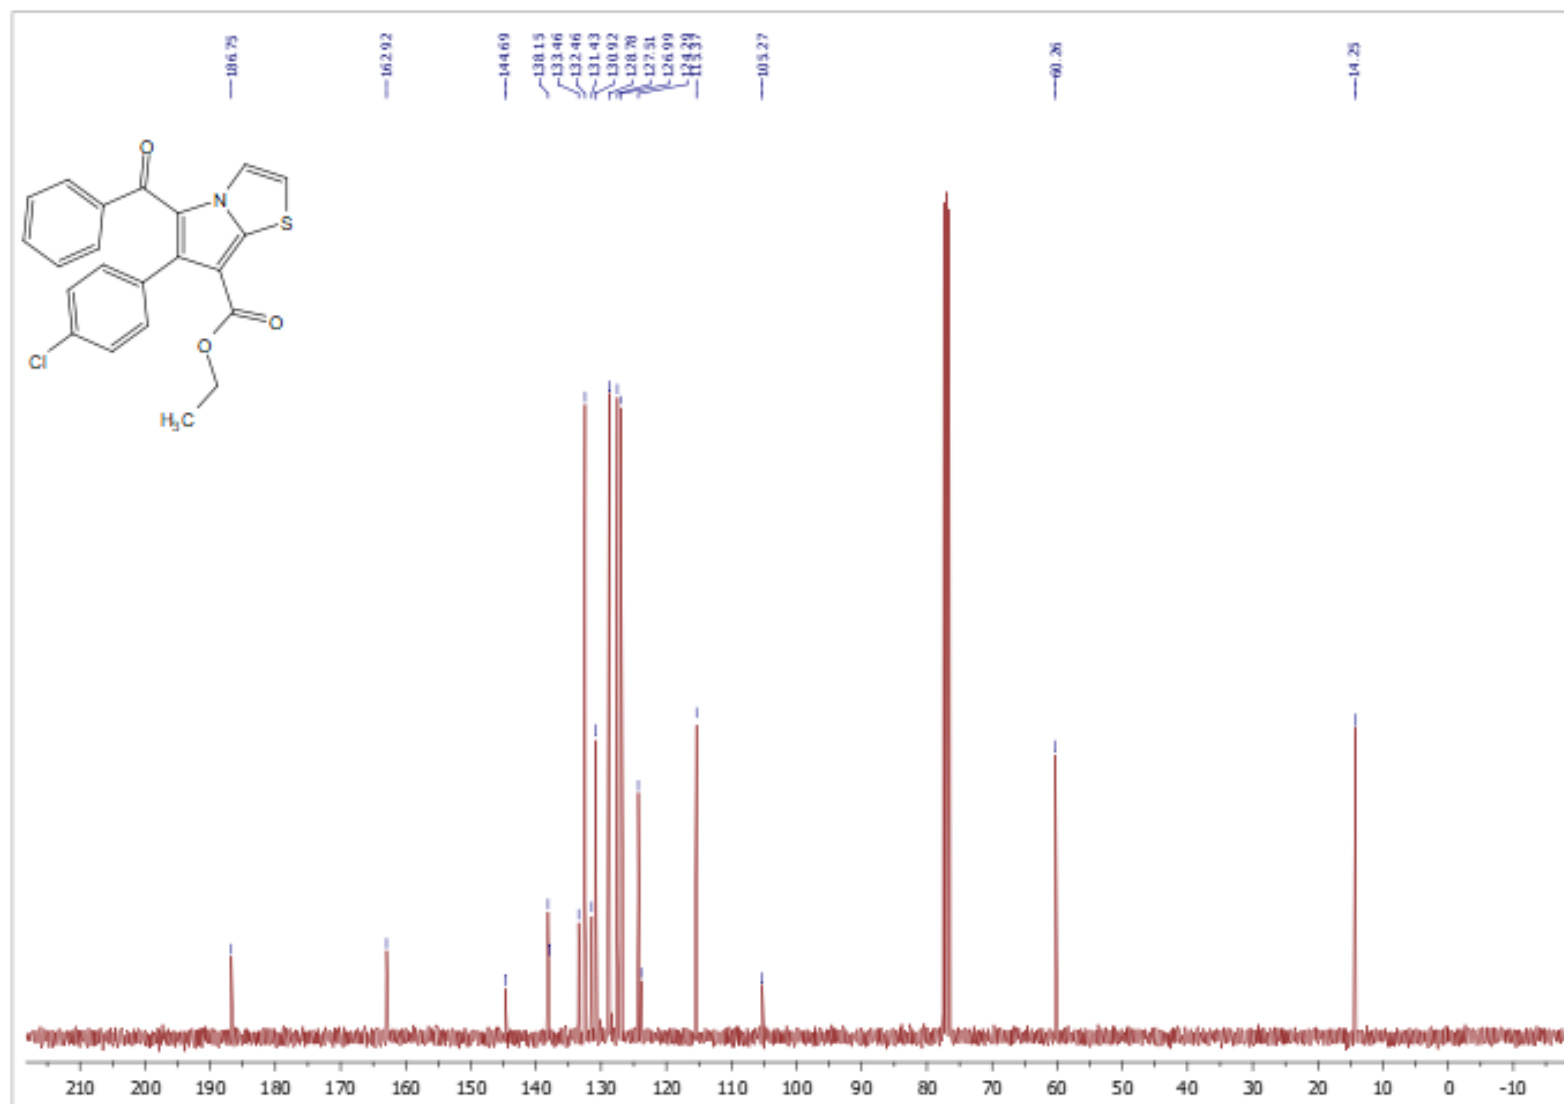

ethyl 5-benzoyl-6-(2-bromophenyl)pyrrolo[2,1-*b*][1,3]thiazole-7-carboxylate **4b**

$^1\text{H}$  NMR

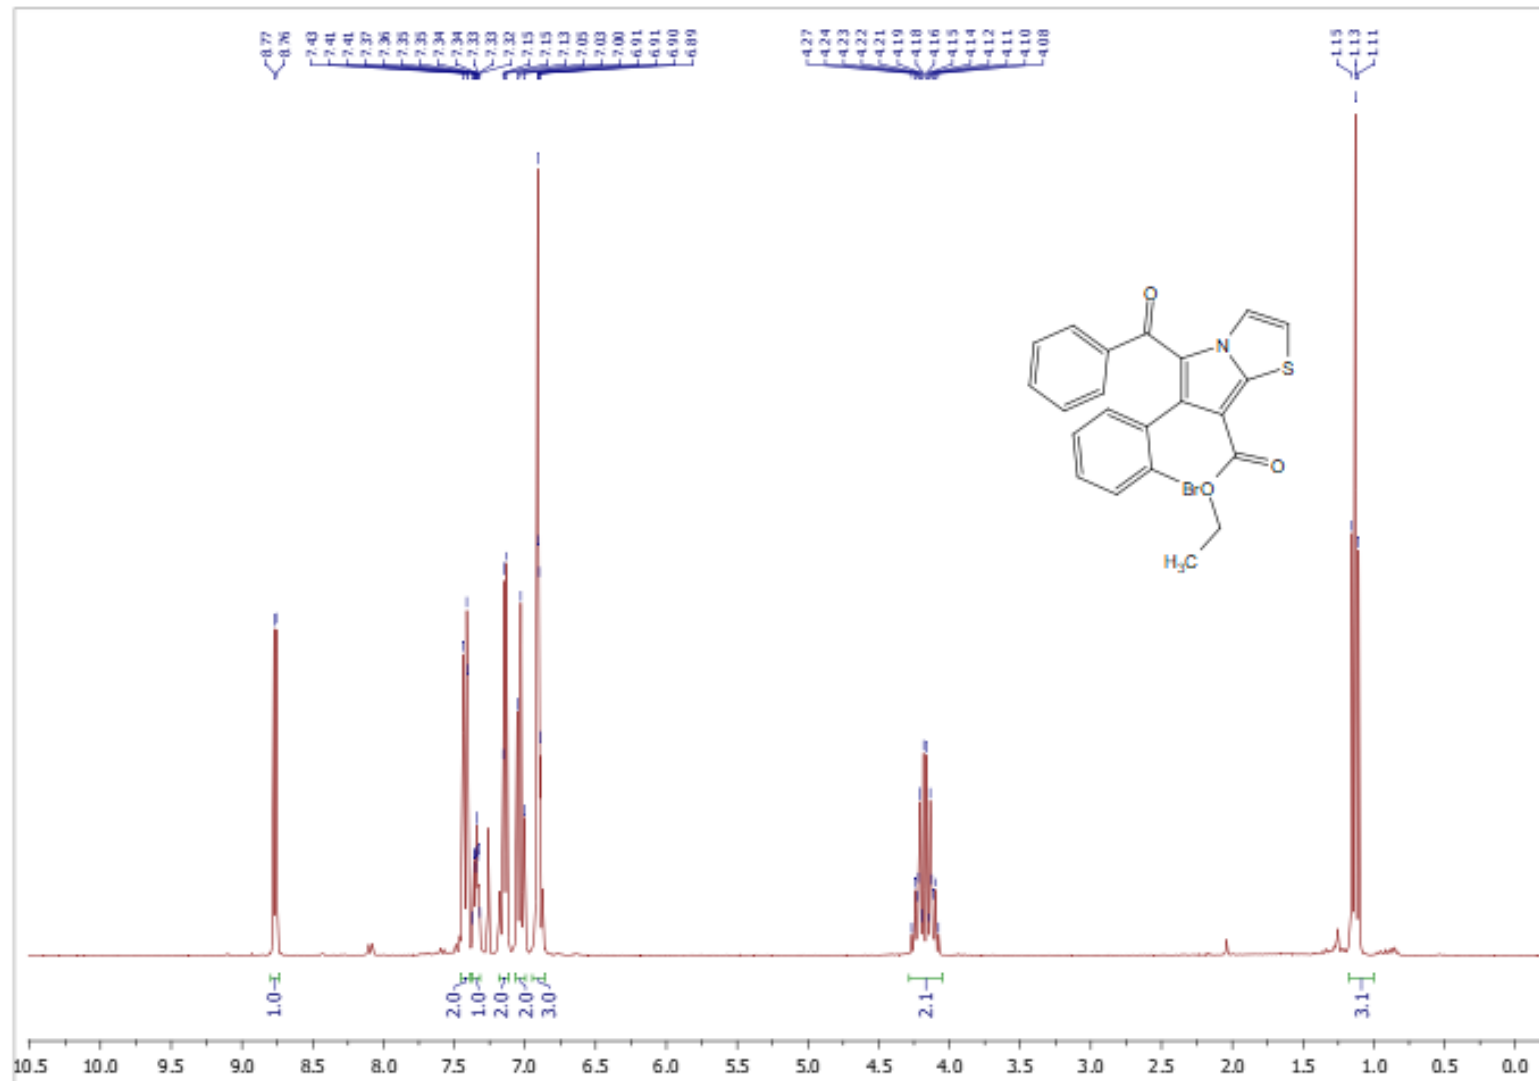

$^{13}\text{C}$  NMR

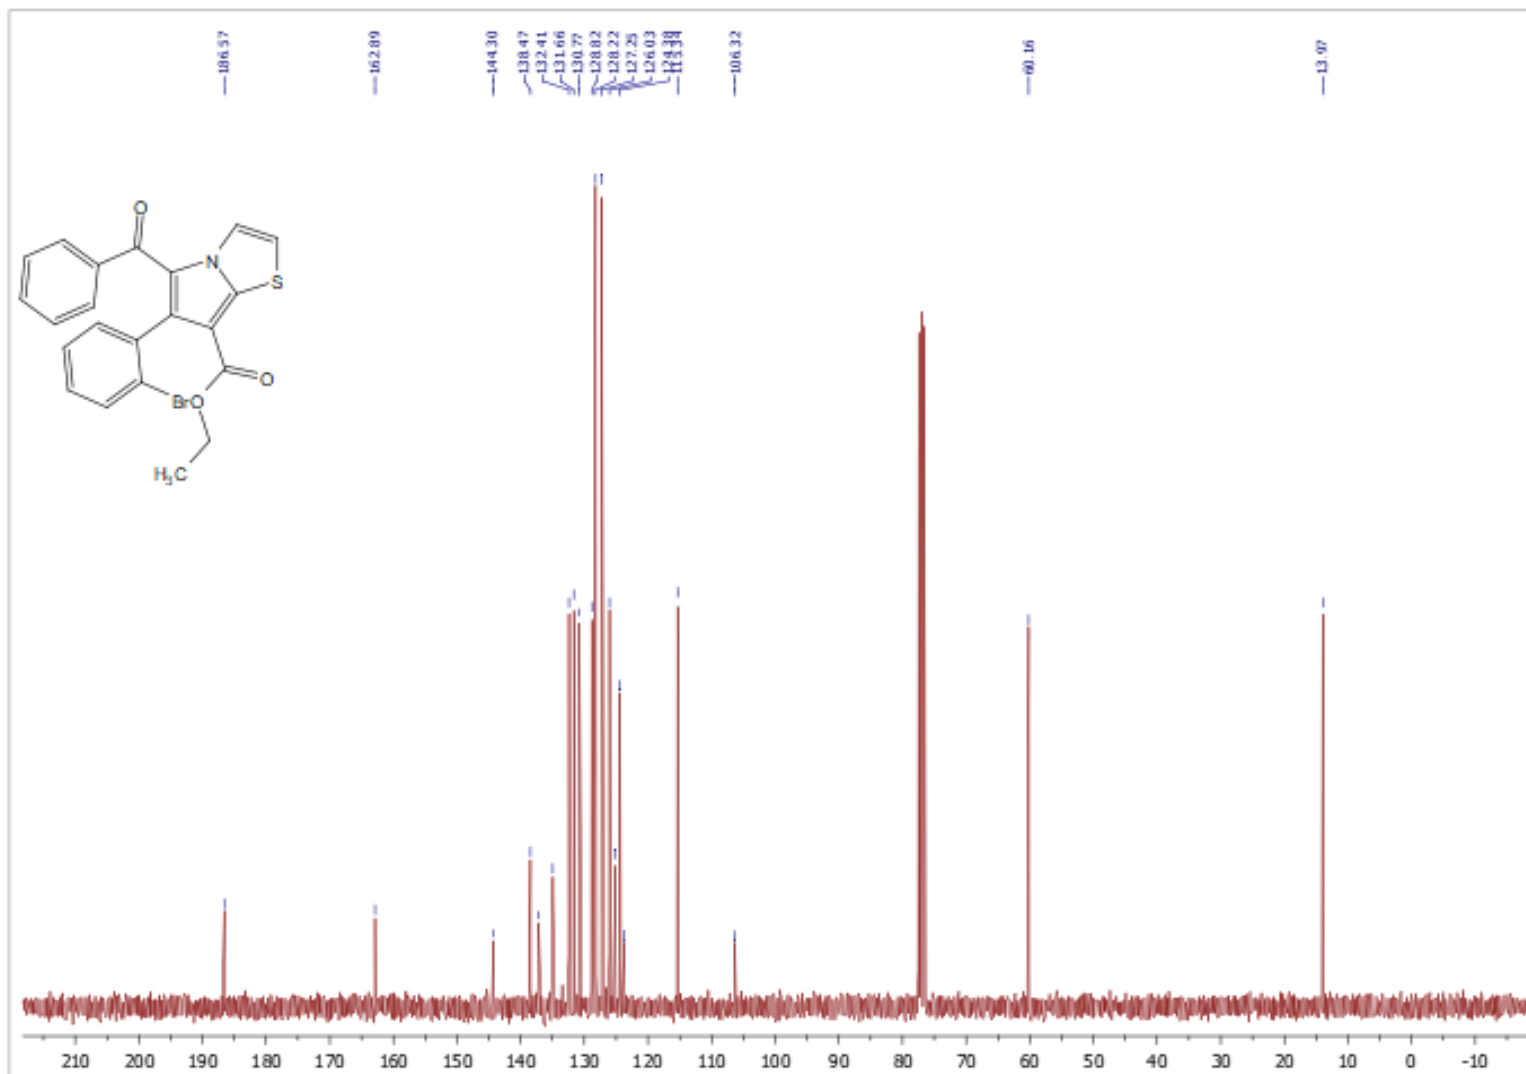

ethyl 6-(4-chlorophenyl)-5-(3-methoxybenzoyl)pyrrolo[2,1-*b*][1,3]thiazole-7-carboxylate **4c**

$^1\text{H}$  NMR

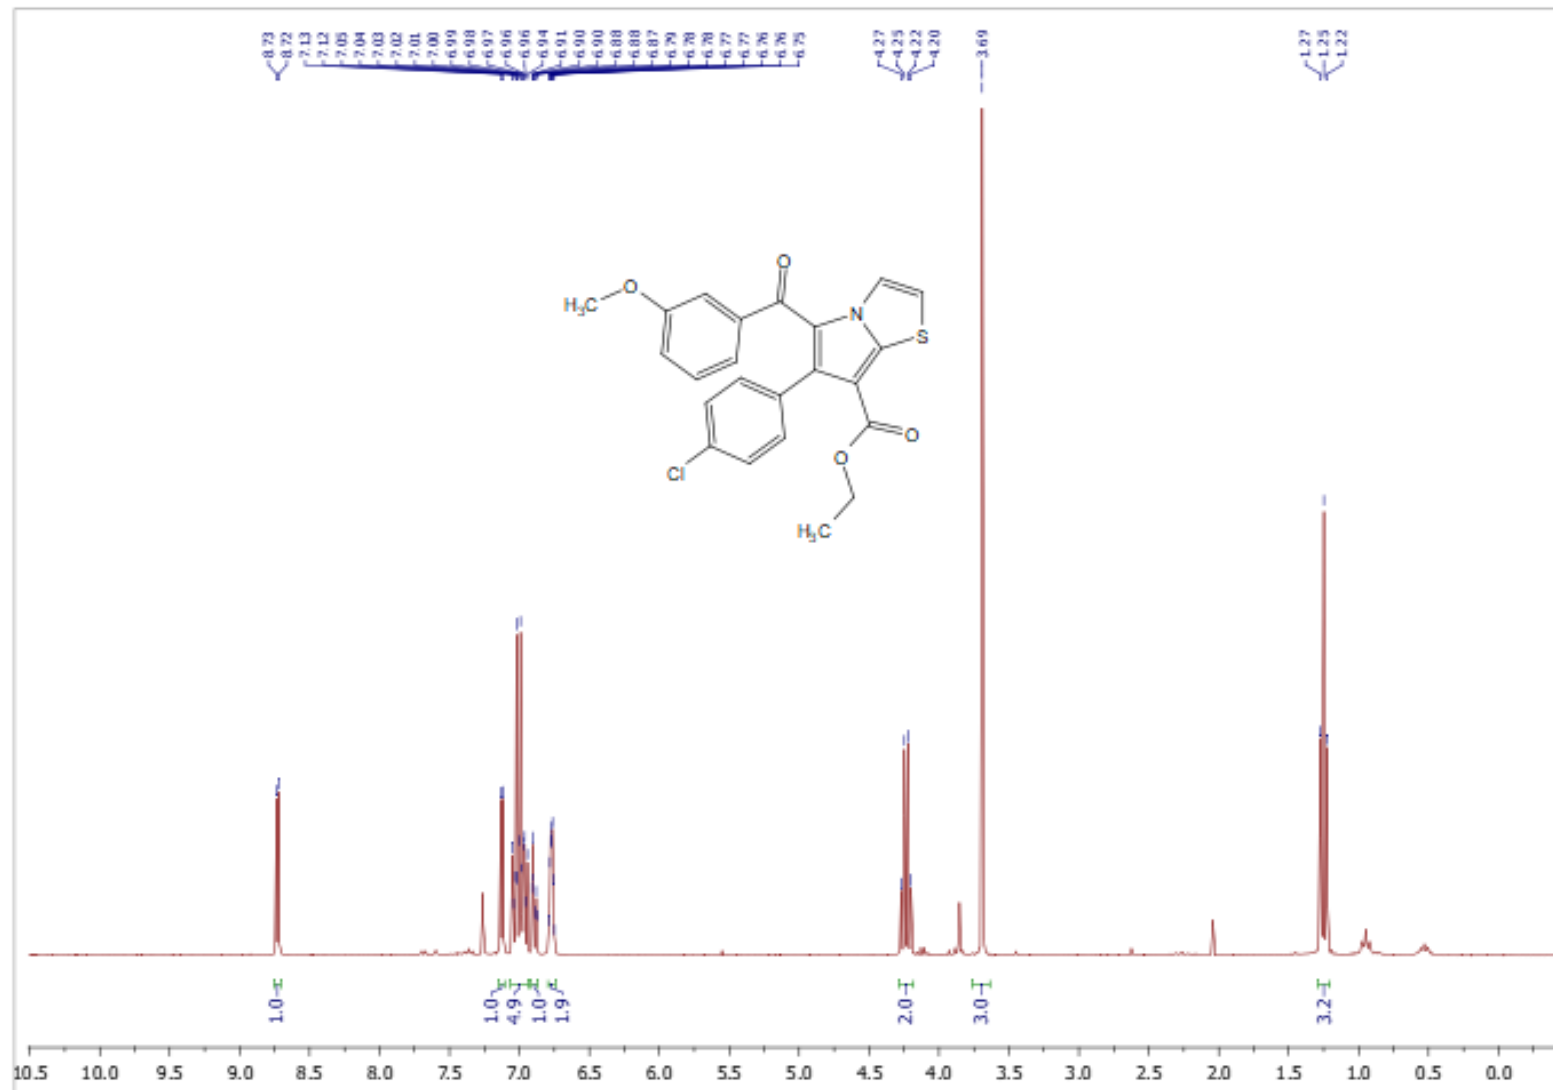



$^{13}\text{C}$  NMR

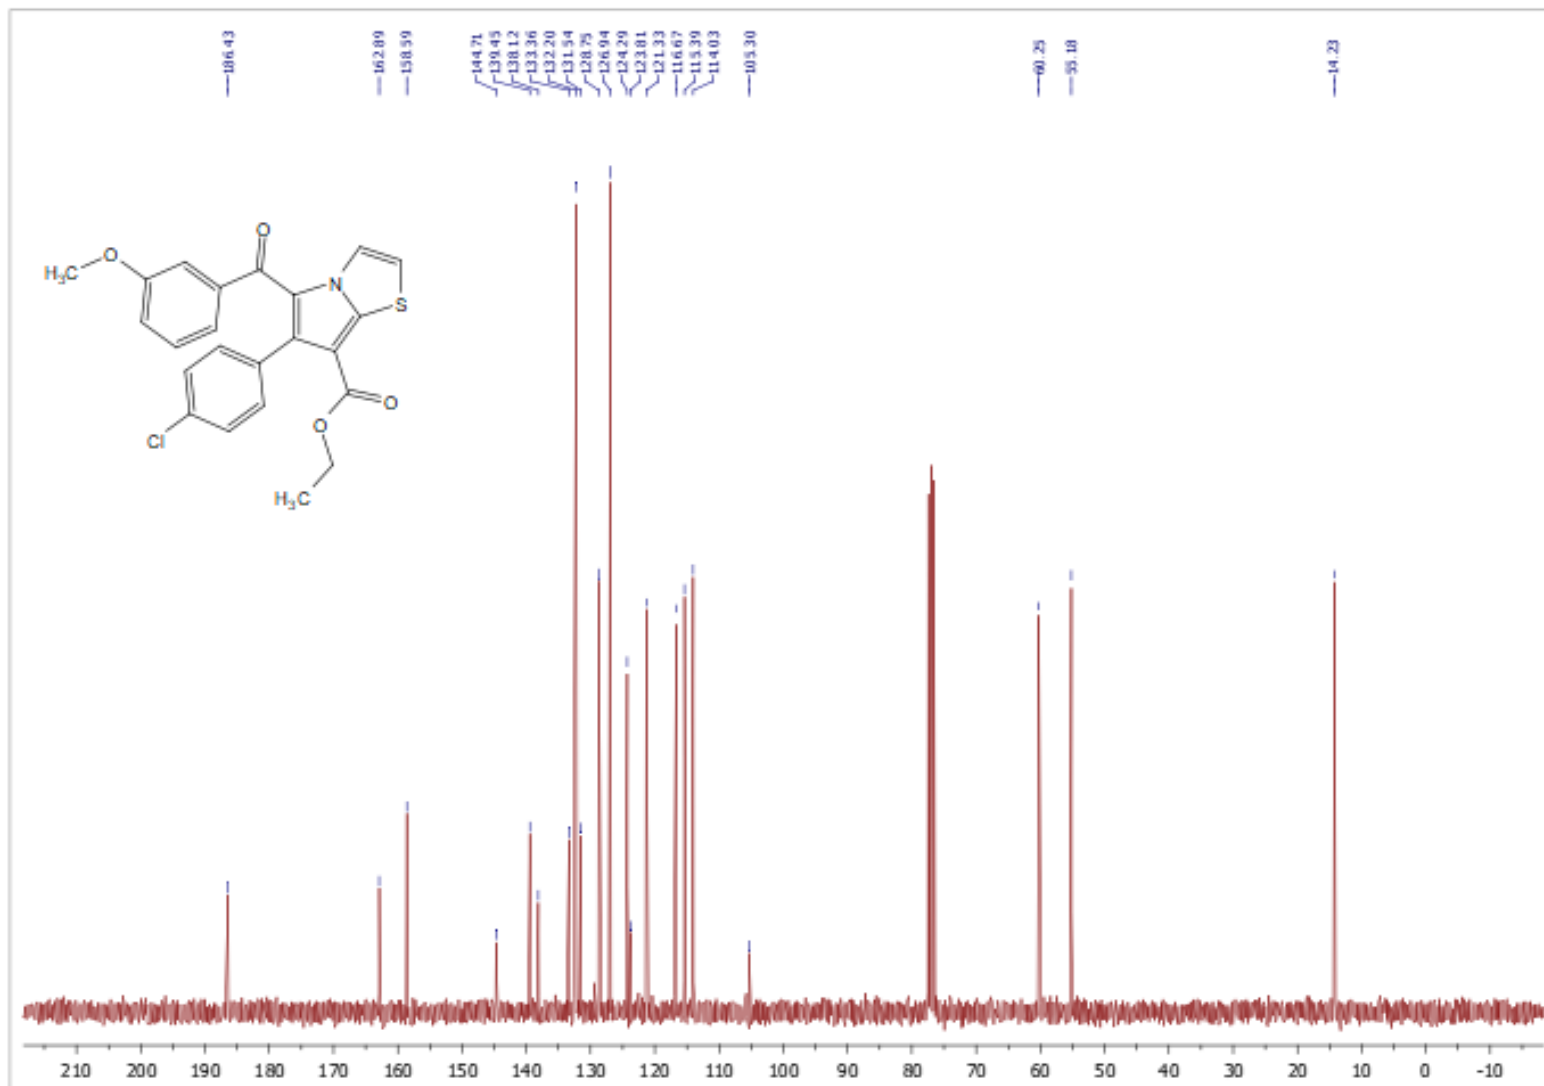

ethyl 6-(4-chlorophenyl)-5-(3-nitrobenzoyl)pyrrolo[2,1-b][1,3]thiazole-7-carboxylate **4d**

<sup>1</sup>H NMR

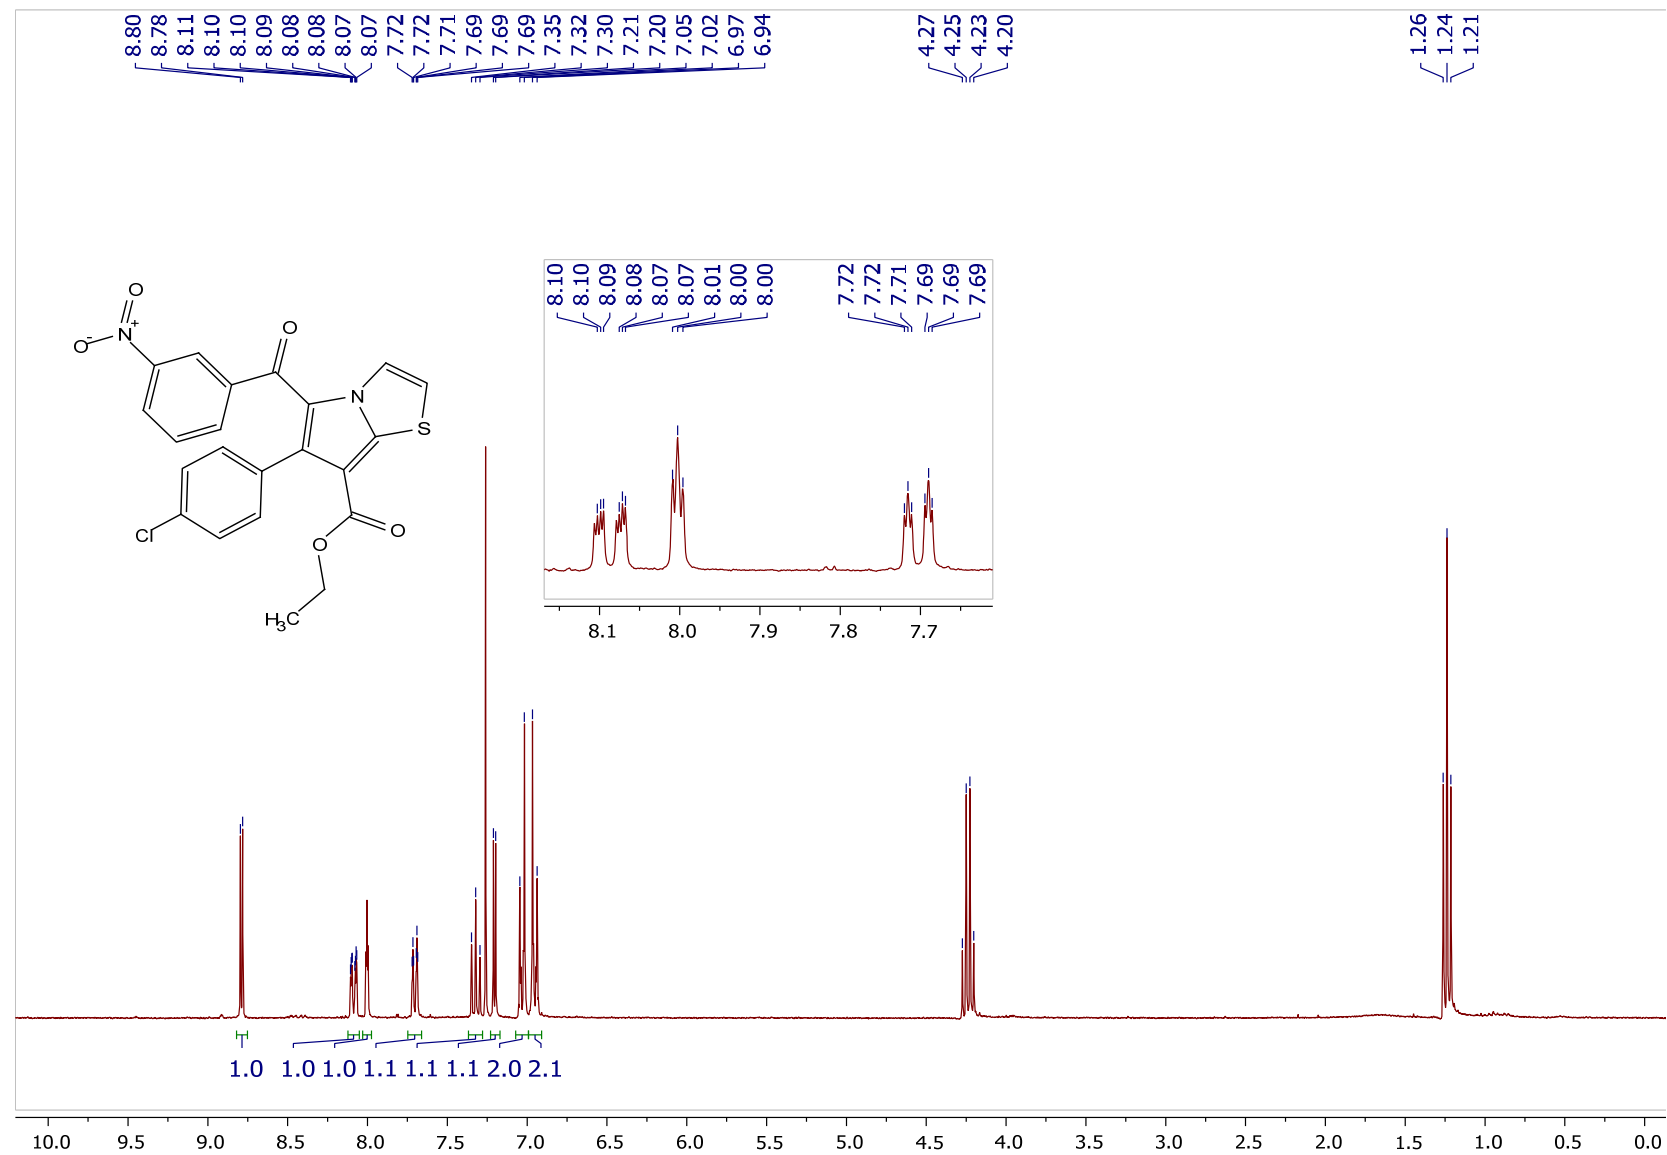

$^{13}\text{C}$  NMR

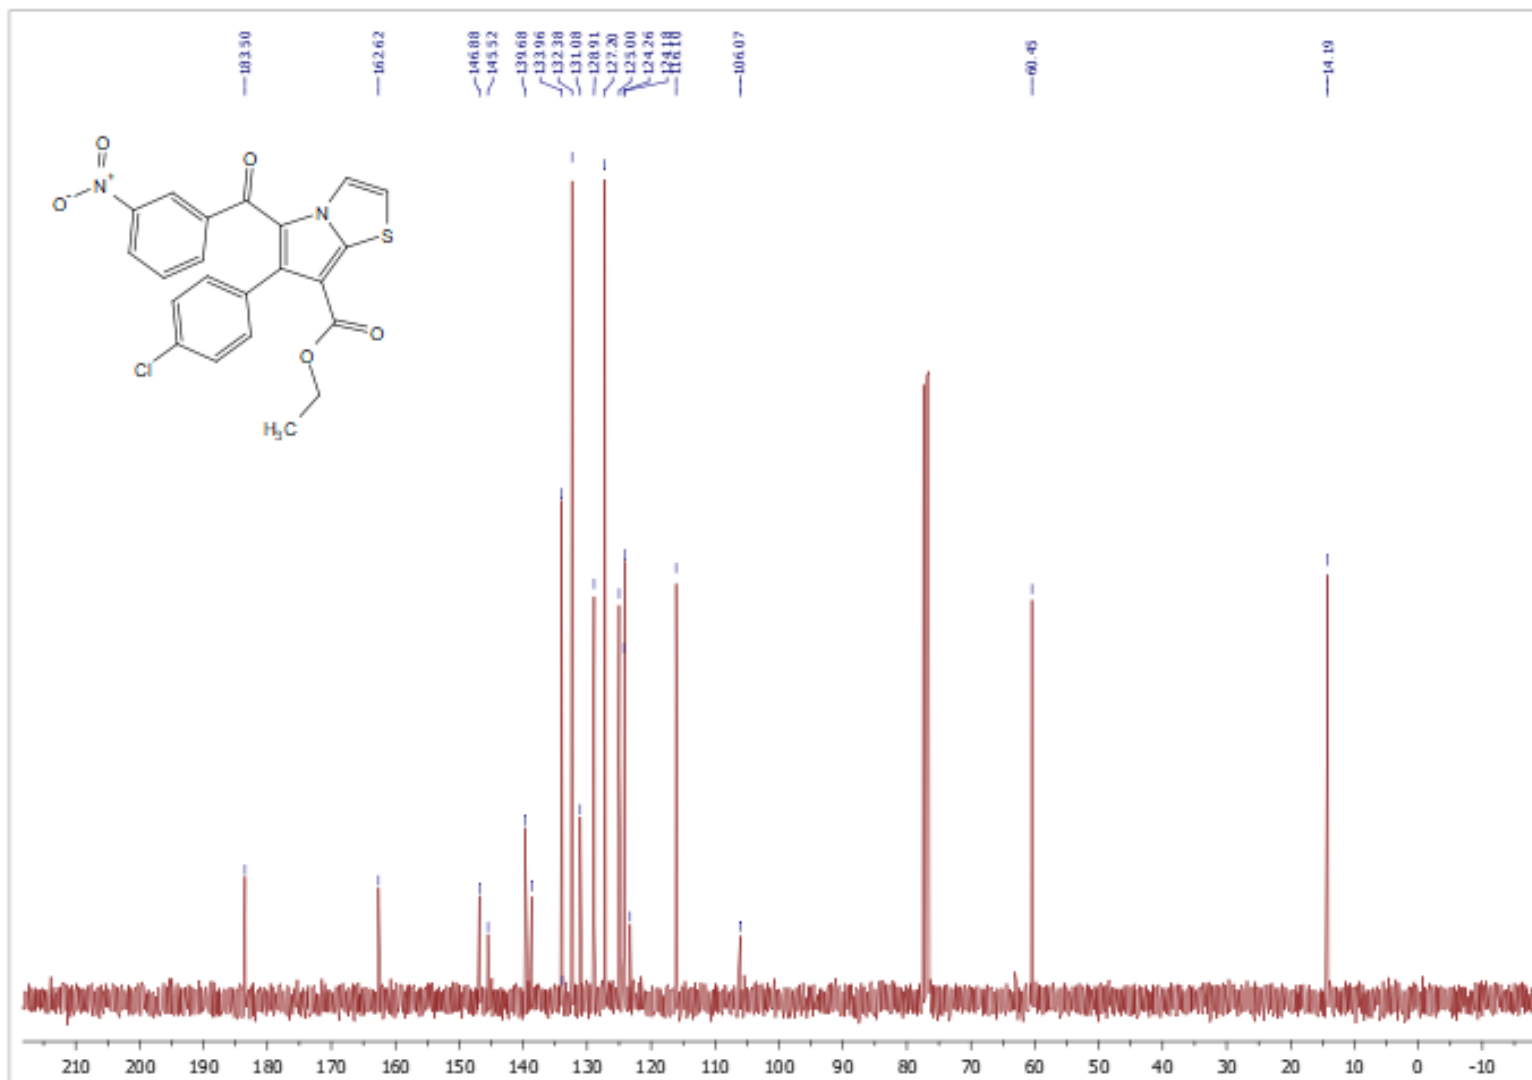

diethyl 6-(4-chlorophenyl)pyrrolo[2,1-*b*][1,3]thiazole-5,7-dicarboxylate **4e**

$^1\text{H}$  NMR

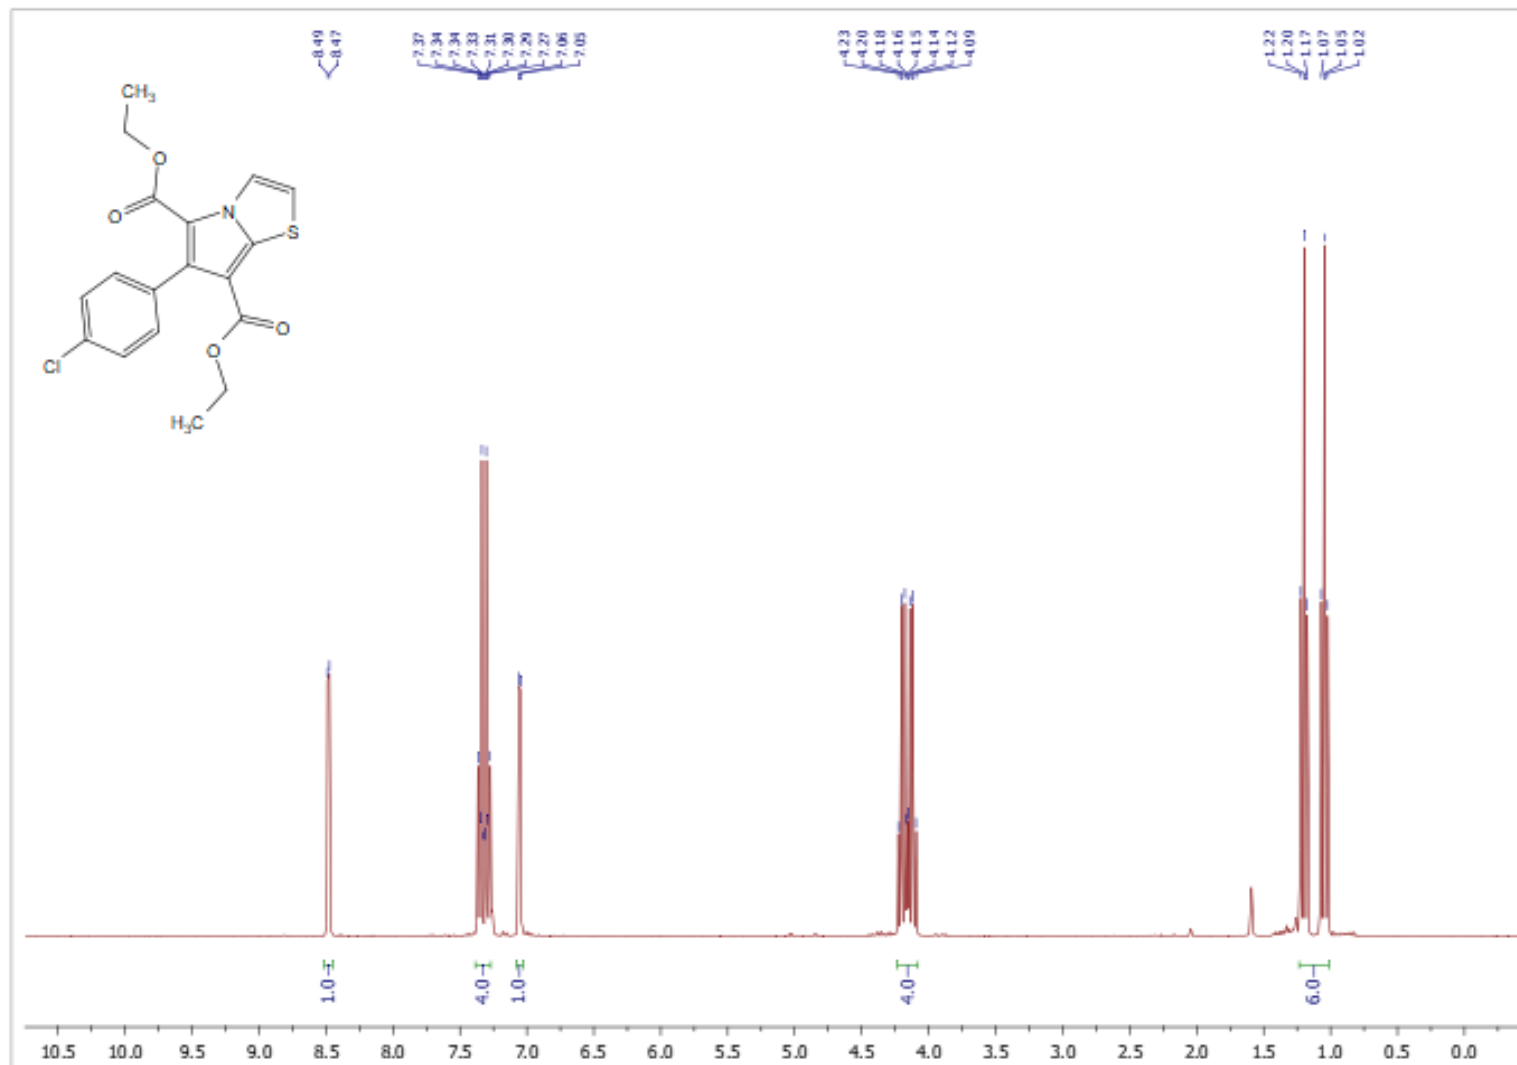

$^{13}\text{C}$  NMR

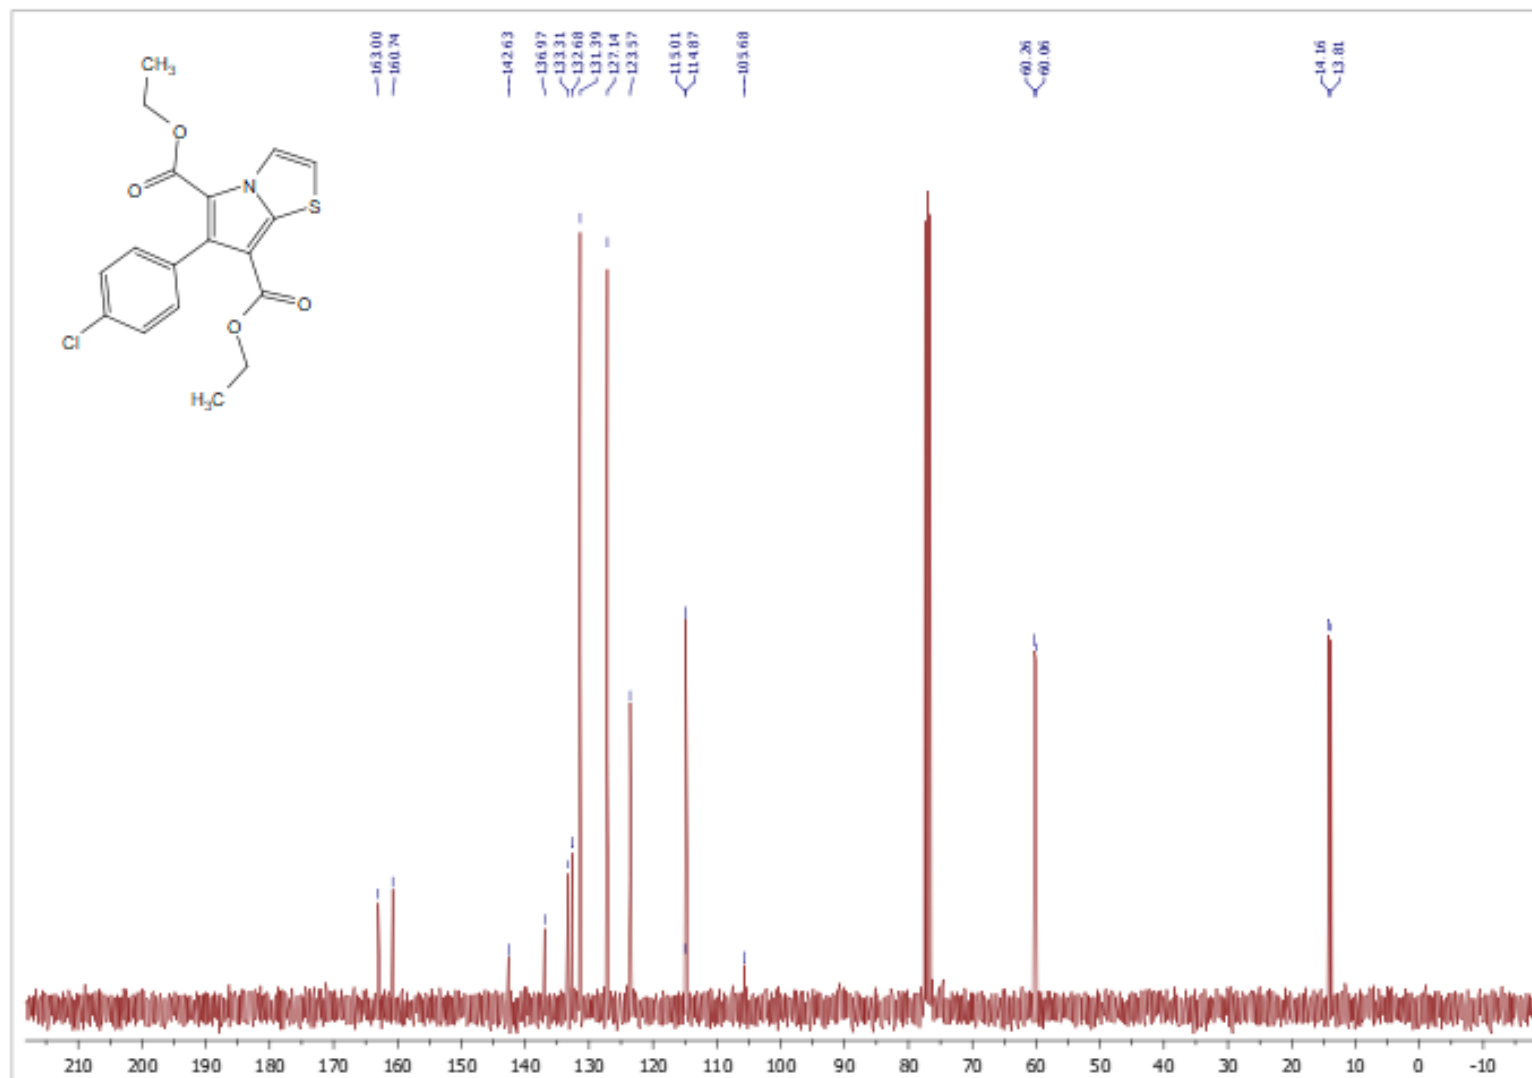

[6-(4-chlorophenyl)pyrrolo[2,1-*b*][1,3]thiazol-5-yl](phenyl)methanone **5a**

<sup>1</sup>H NMR

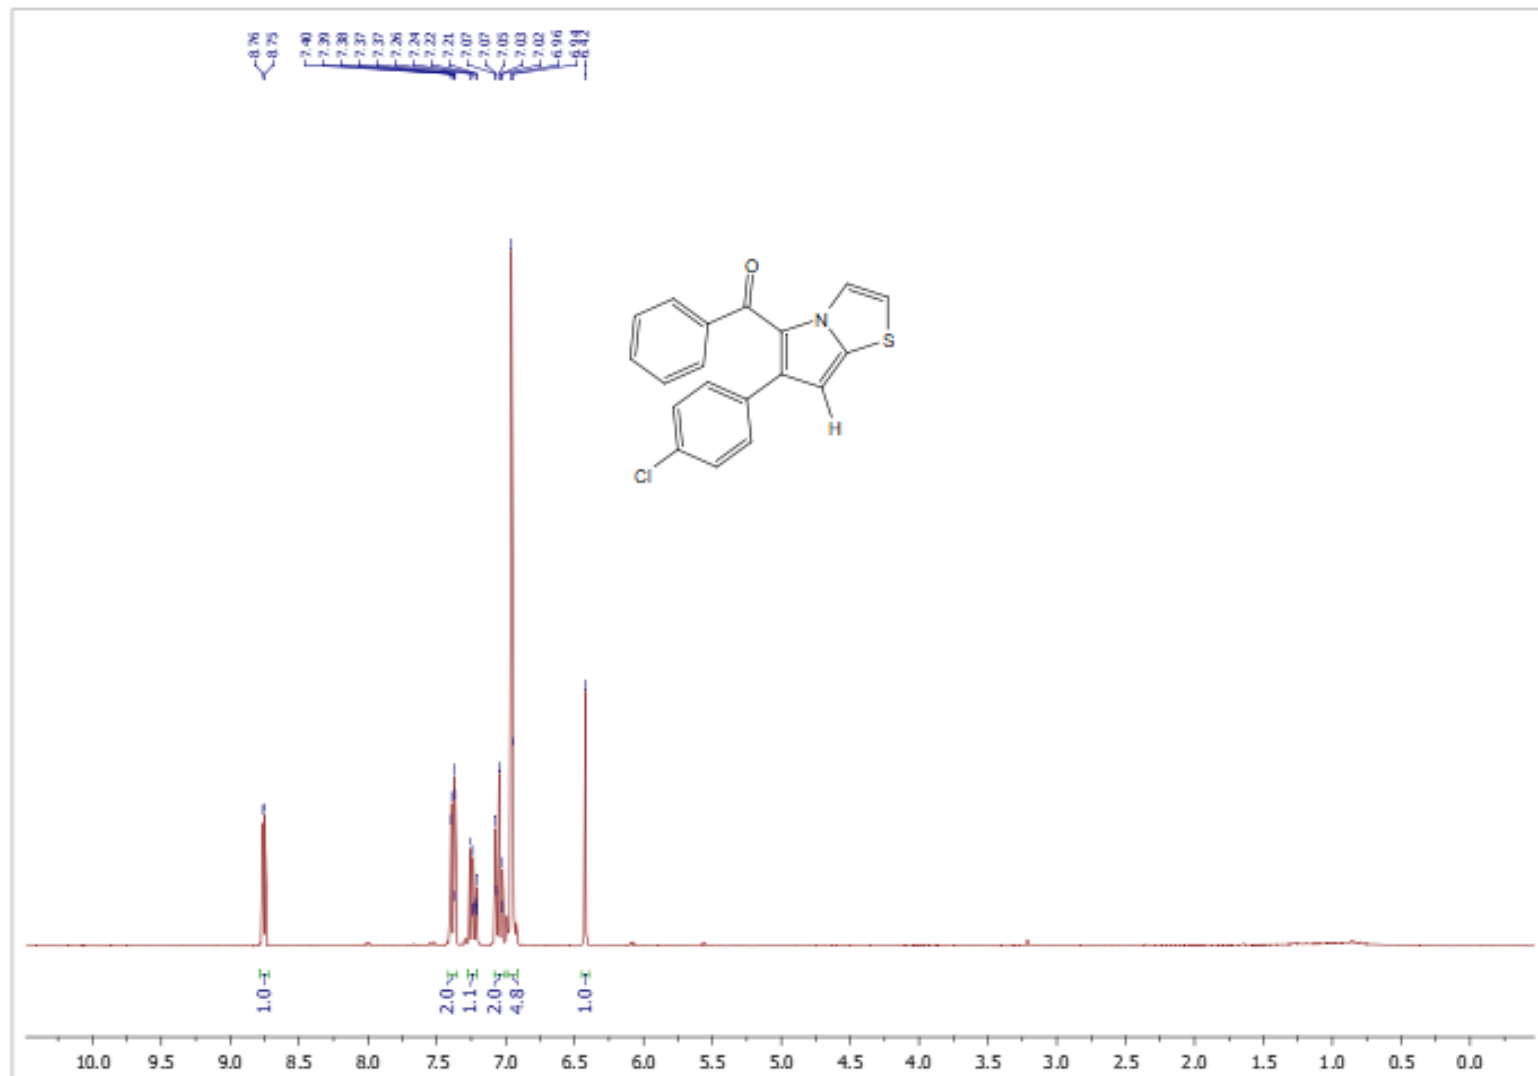

$^{13}\text{C}$  NMR

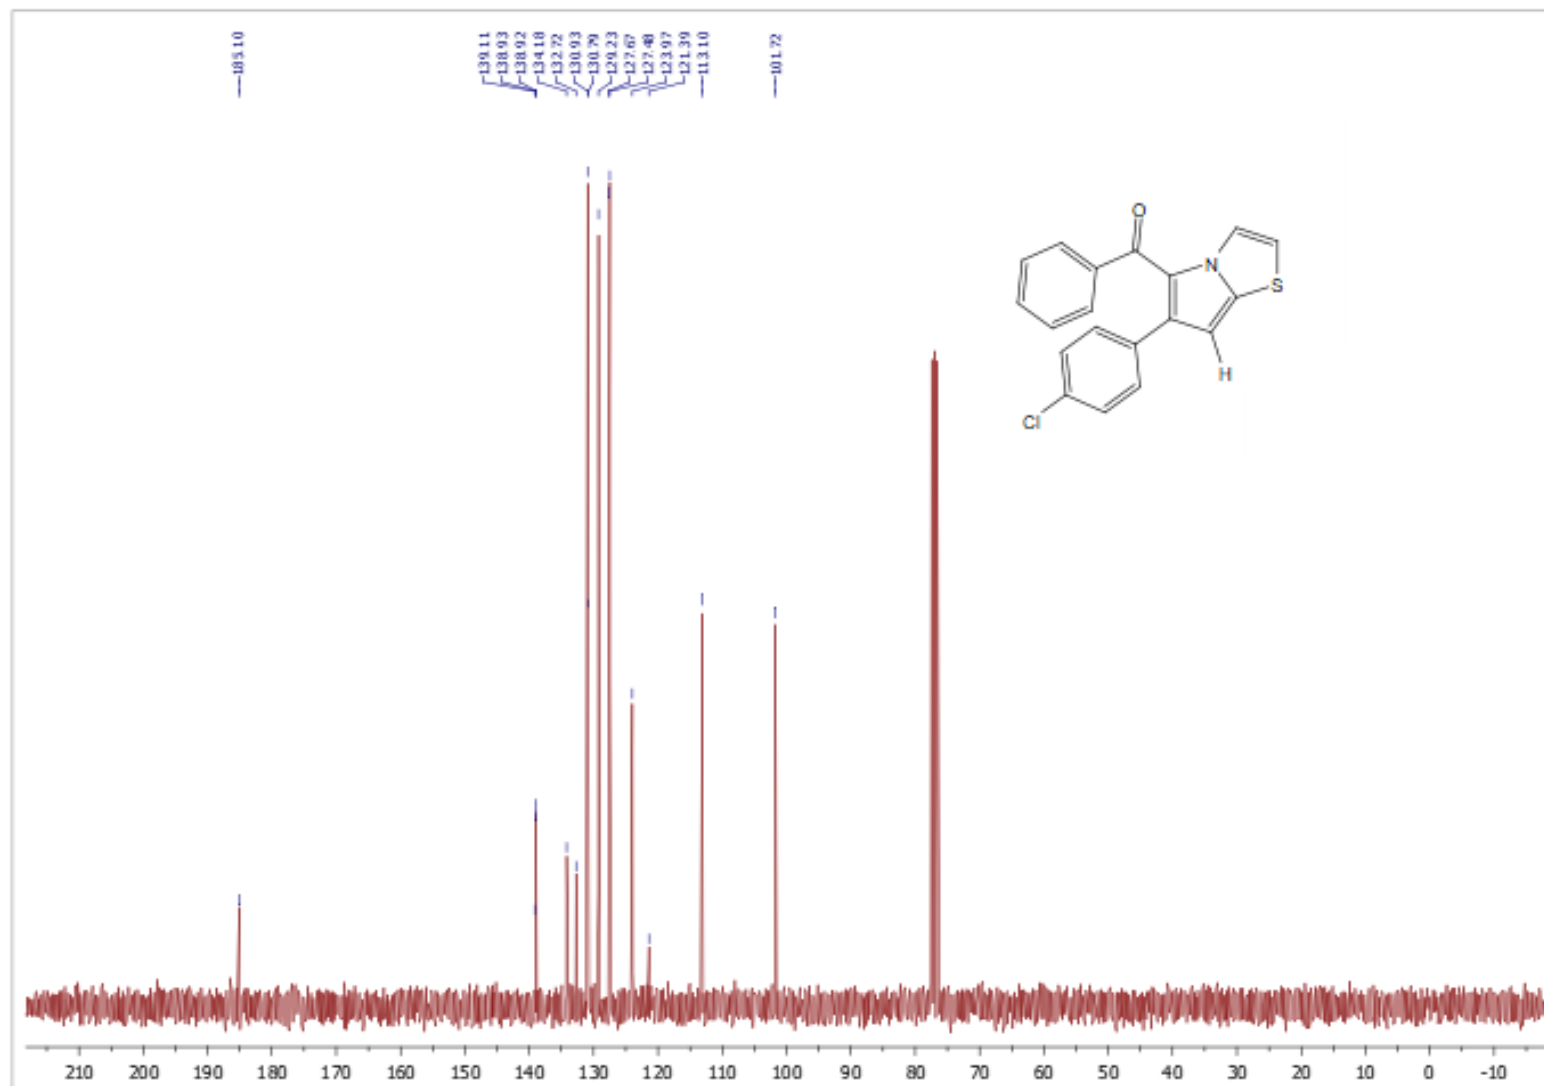

$^1\text{H}$ - $^1\text{H}$  COSY NMR

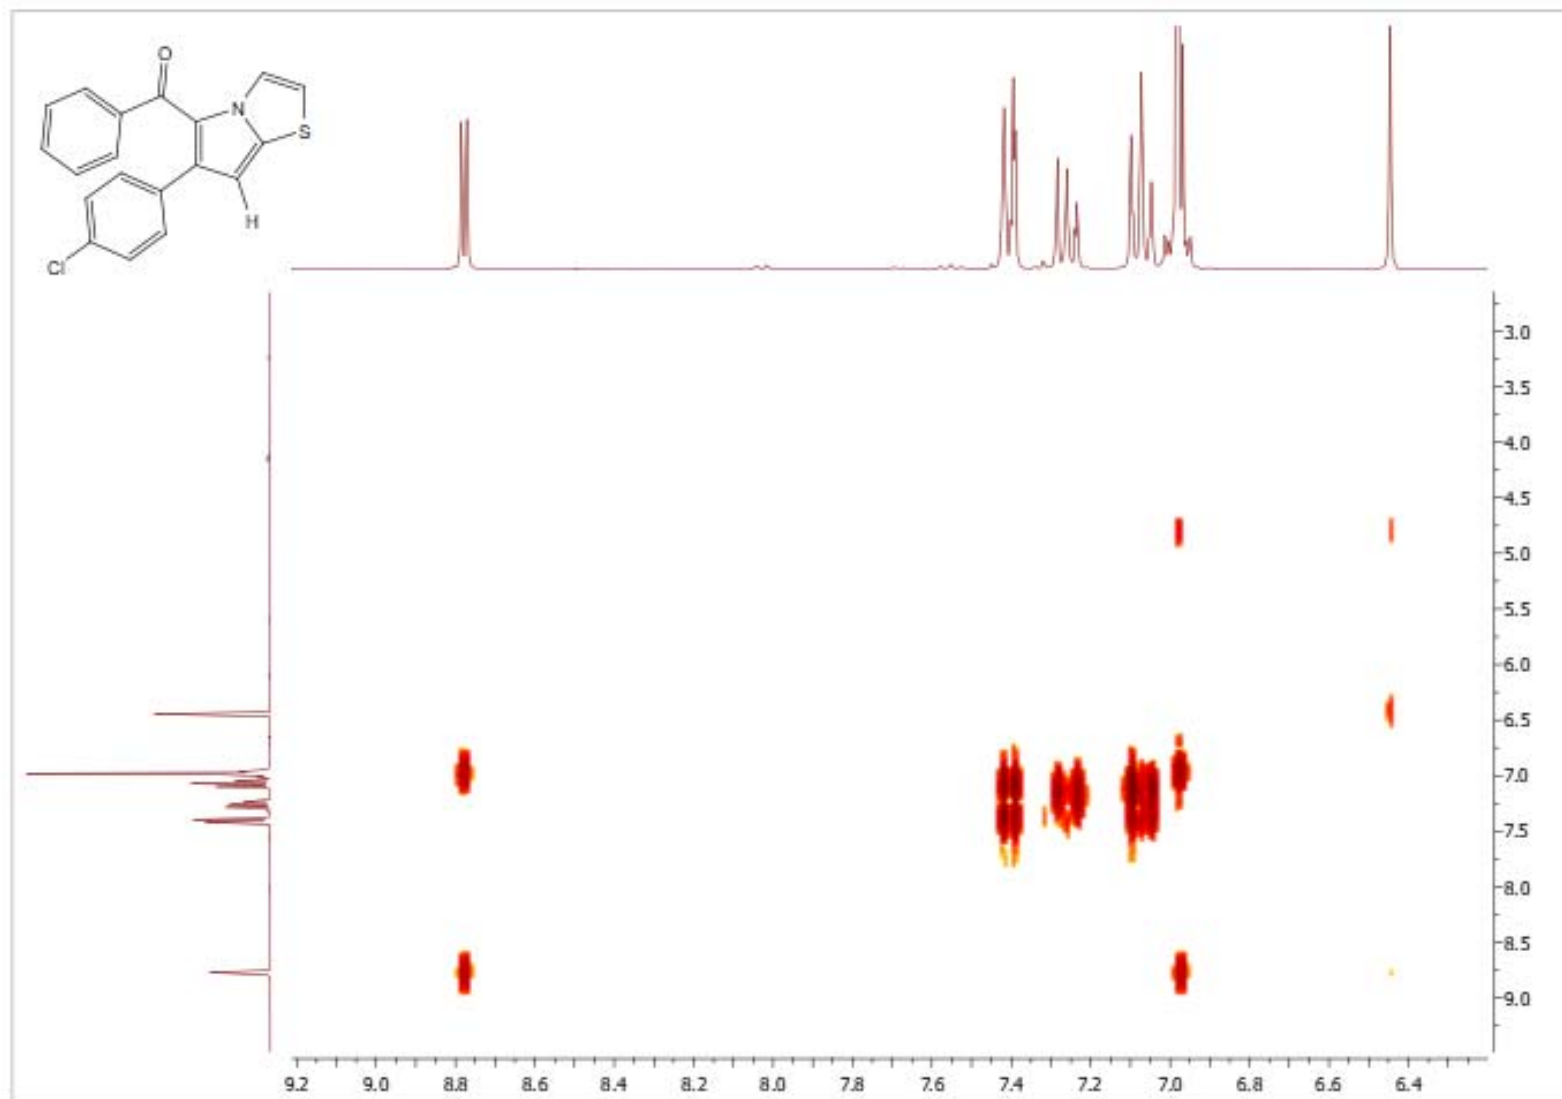



$^1\text{H}$ - $^{13}\text{C}$  HSQC NMR

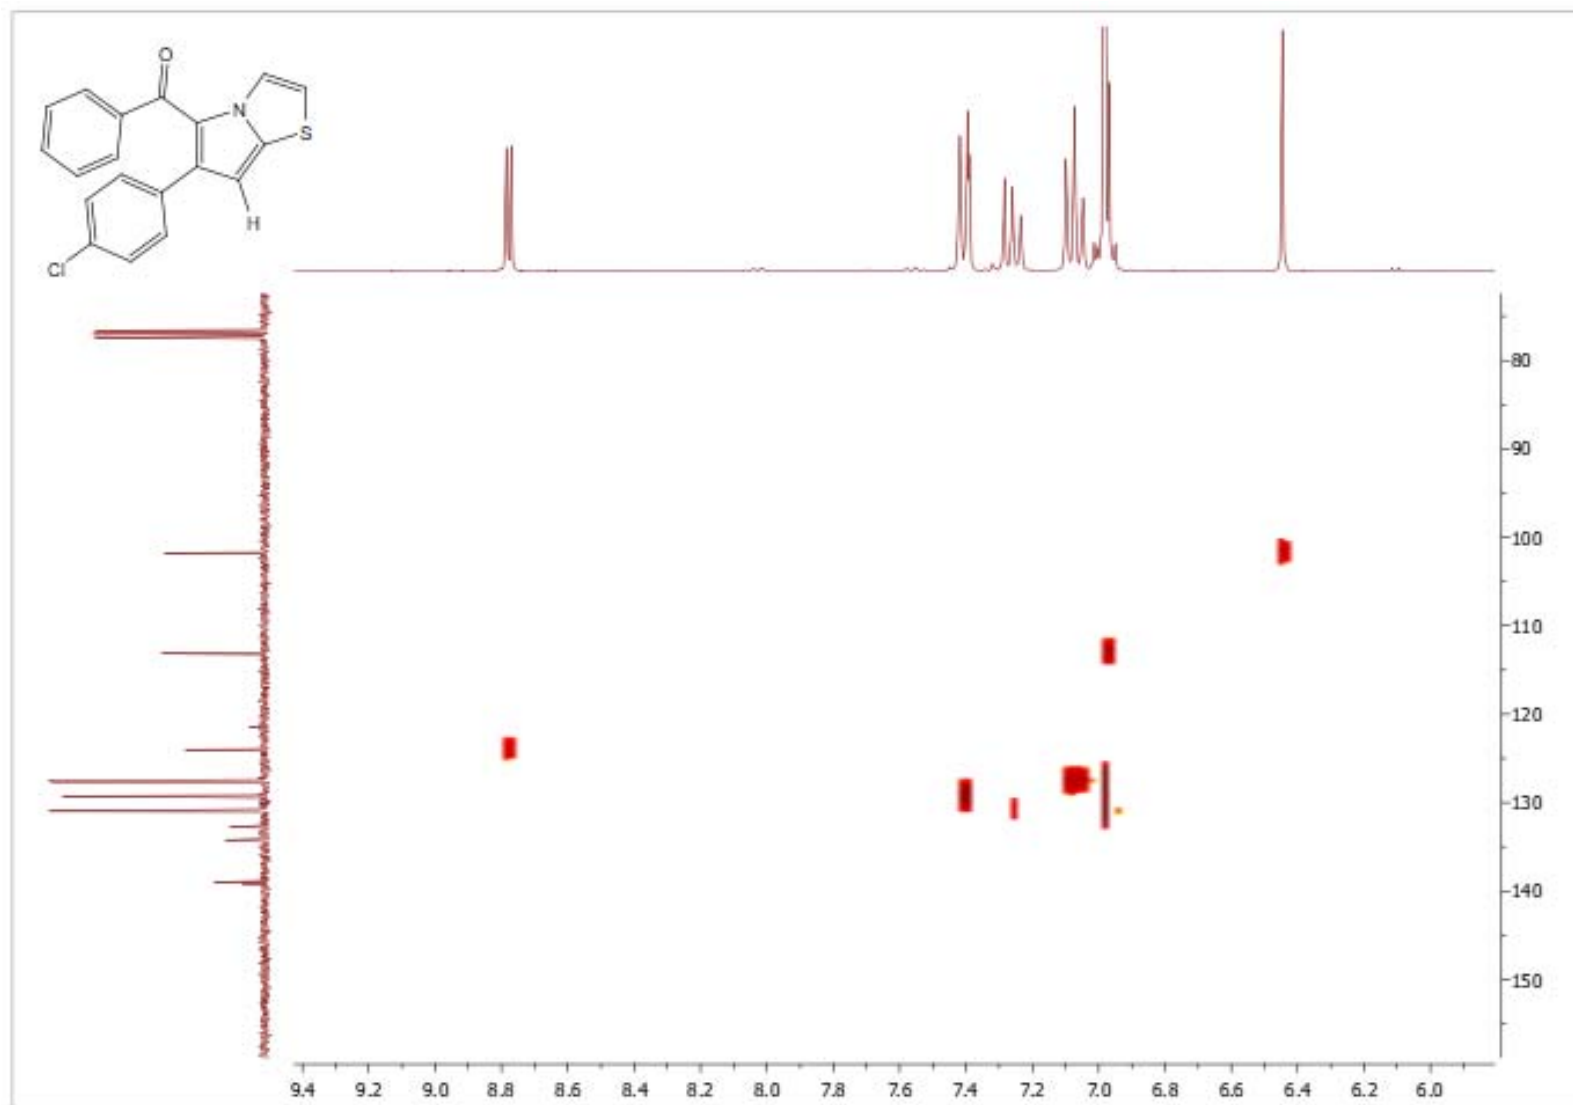

$^1\text{H}$ - $^{13}\text{C}$  HMBC NMR

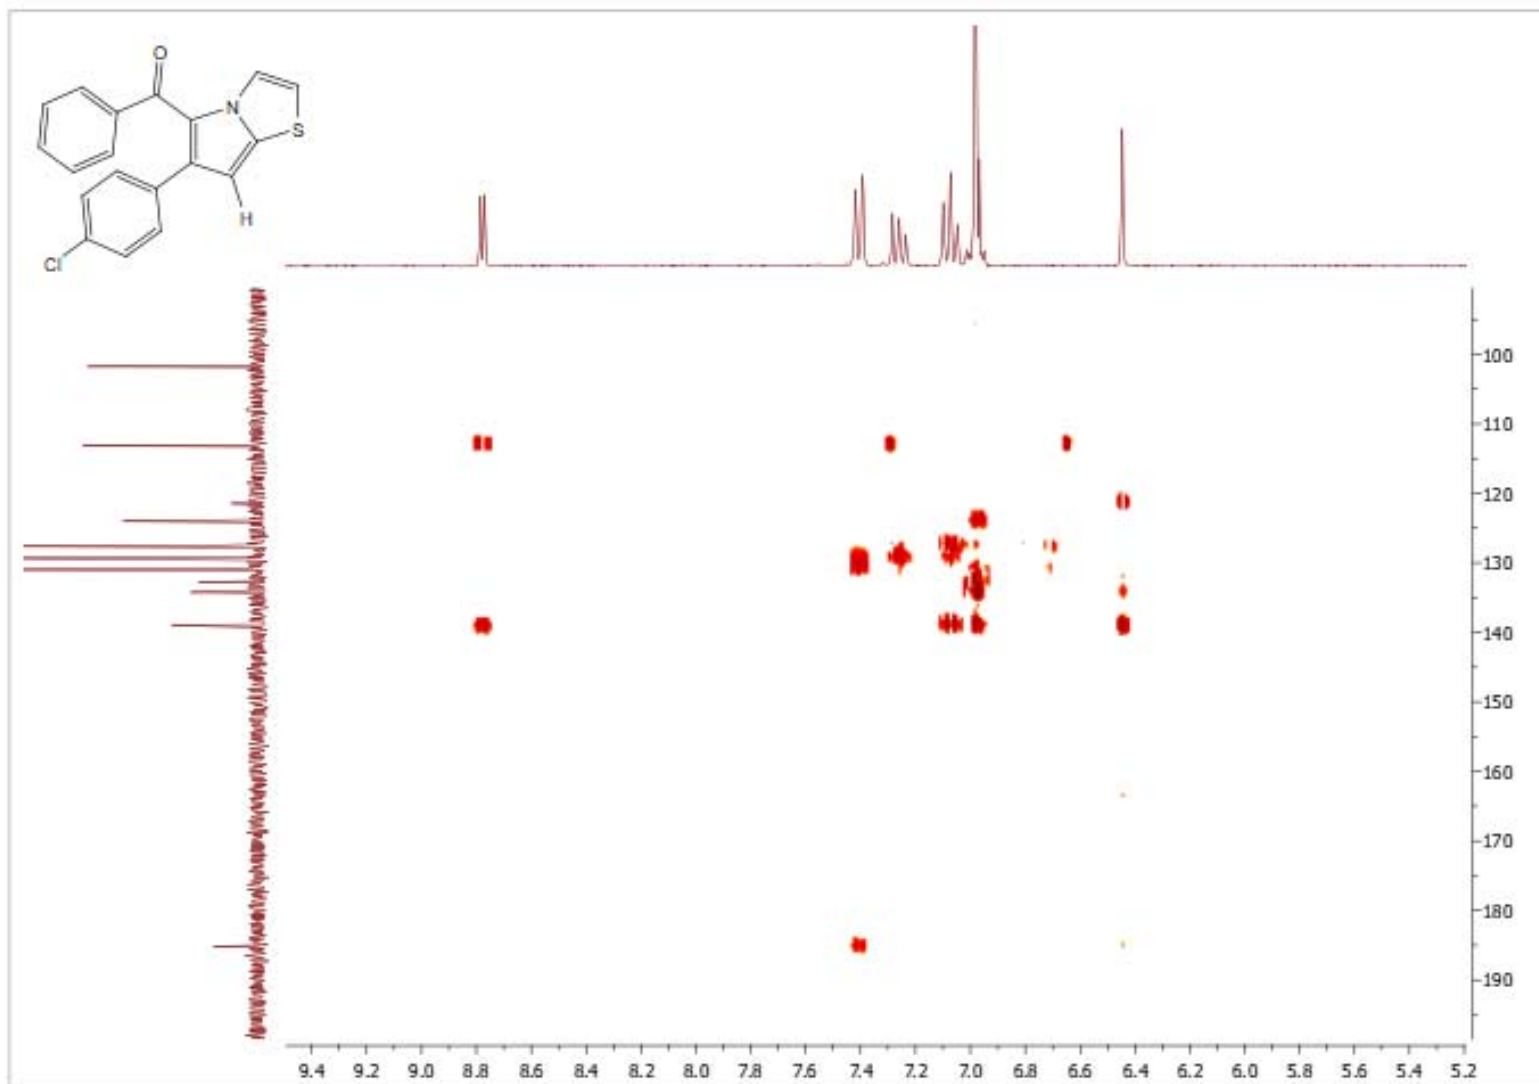

phenyl(6-phenylpyrrolo[2,1-*b*][1,3]thiazol-5-yl)methanone **5b**

<sup>1</sup>H NMR

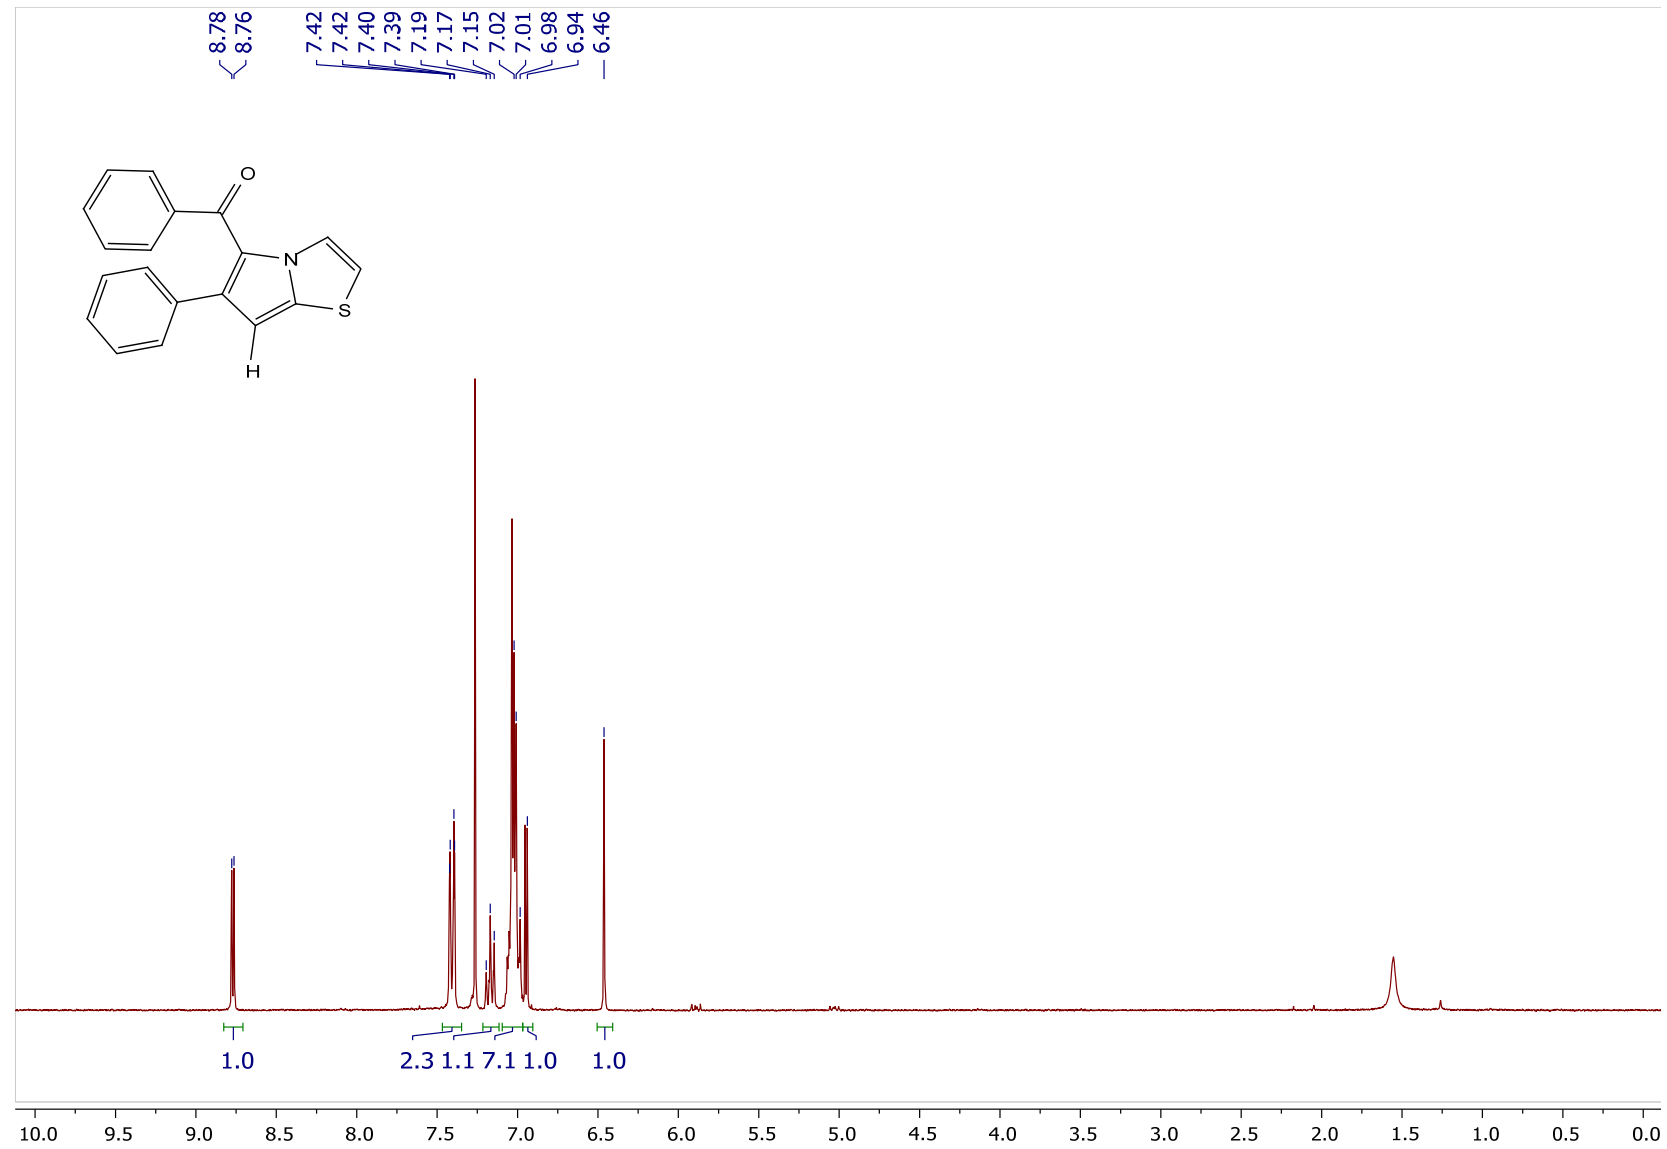

$^{13}\text{C}$  NMR

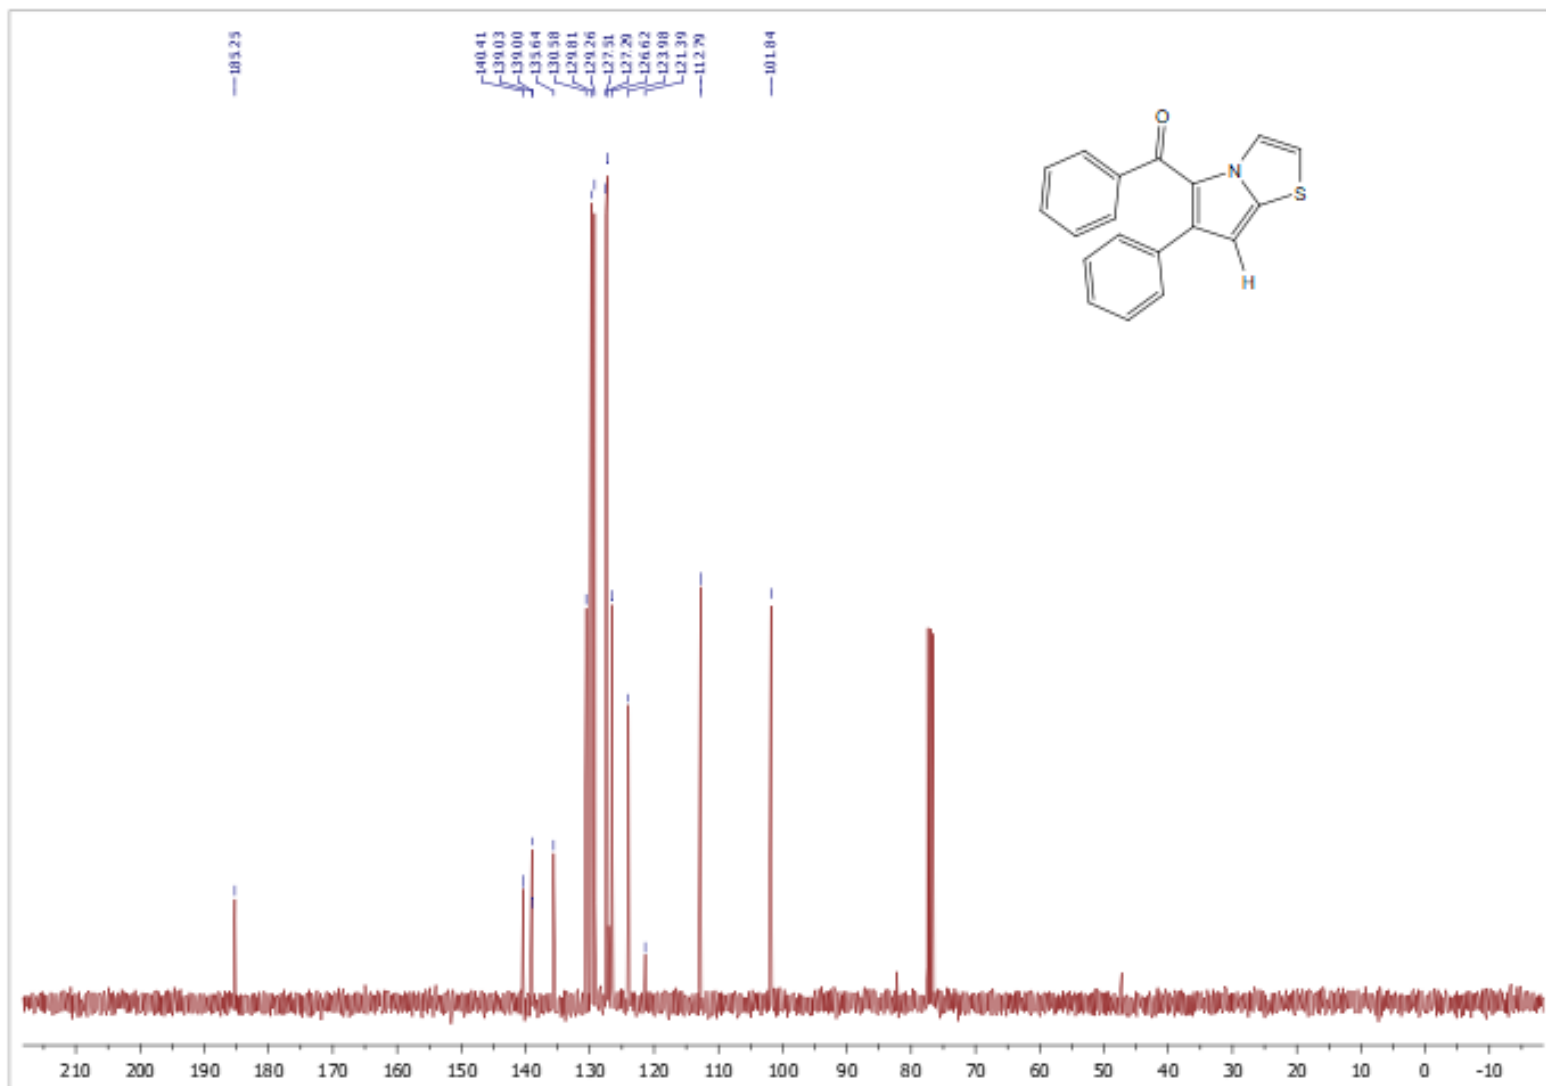

$^1\text{H}$ - $^{13}\text{C}$  HSQC NMR

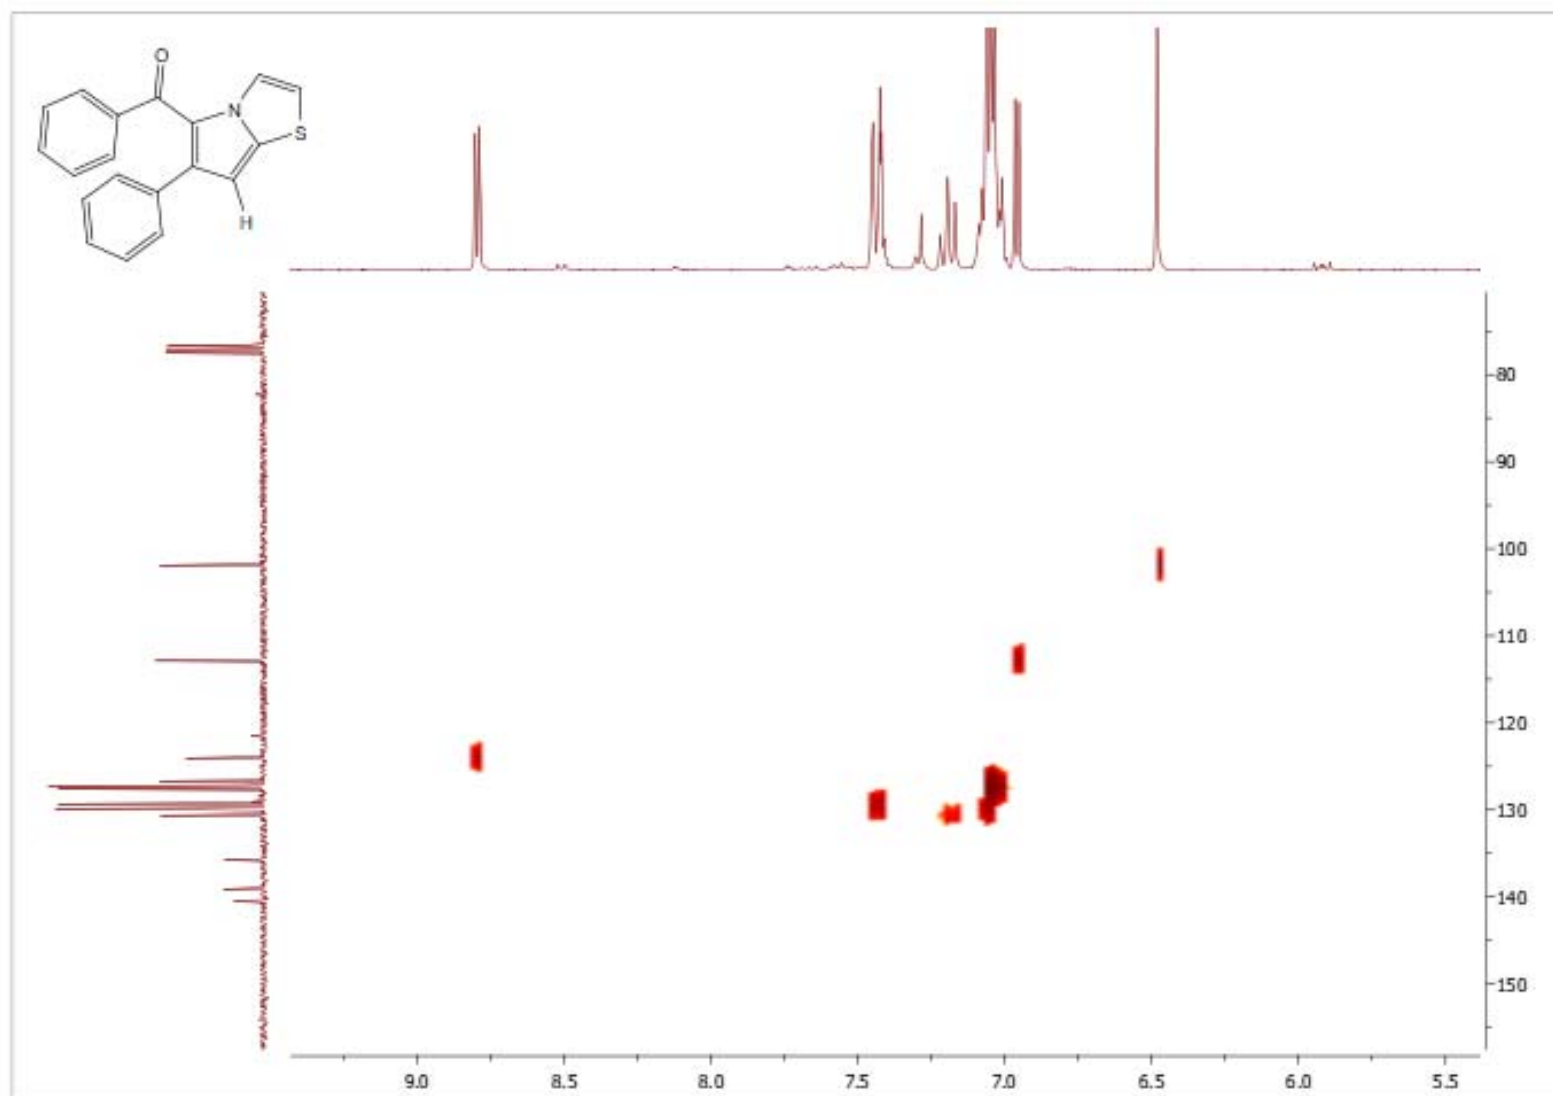

$^1\text{H}$ - $^{13}\text{C}$  HMBC NMR

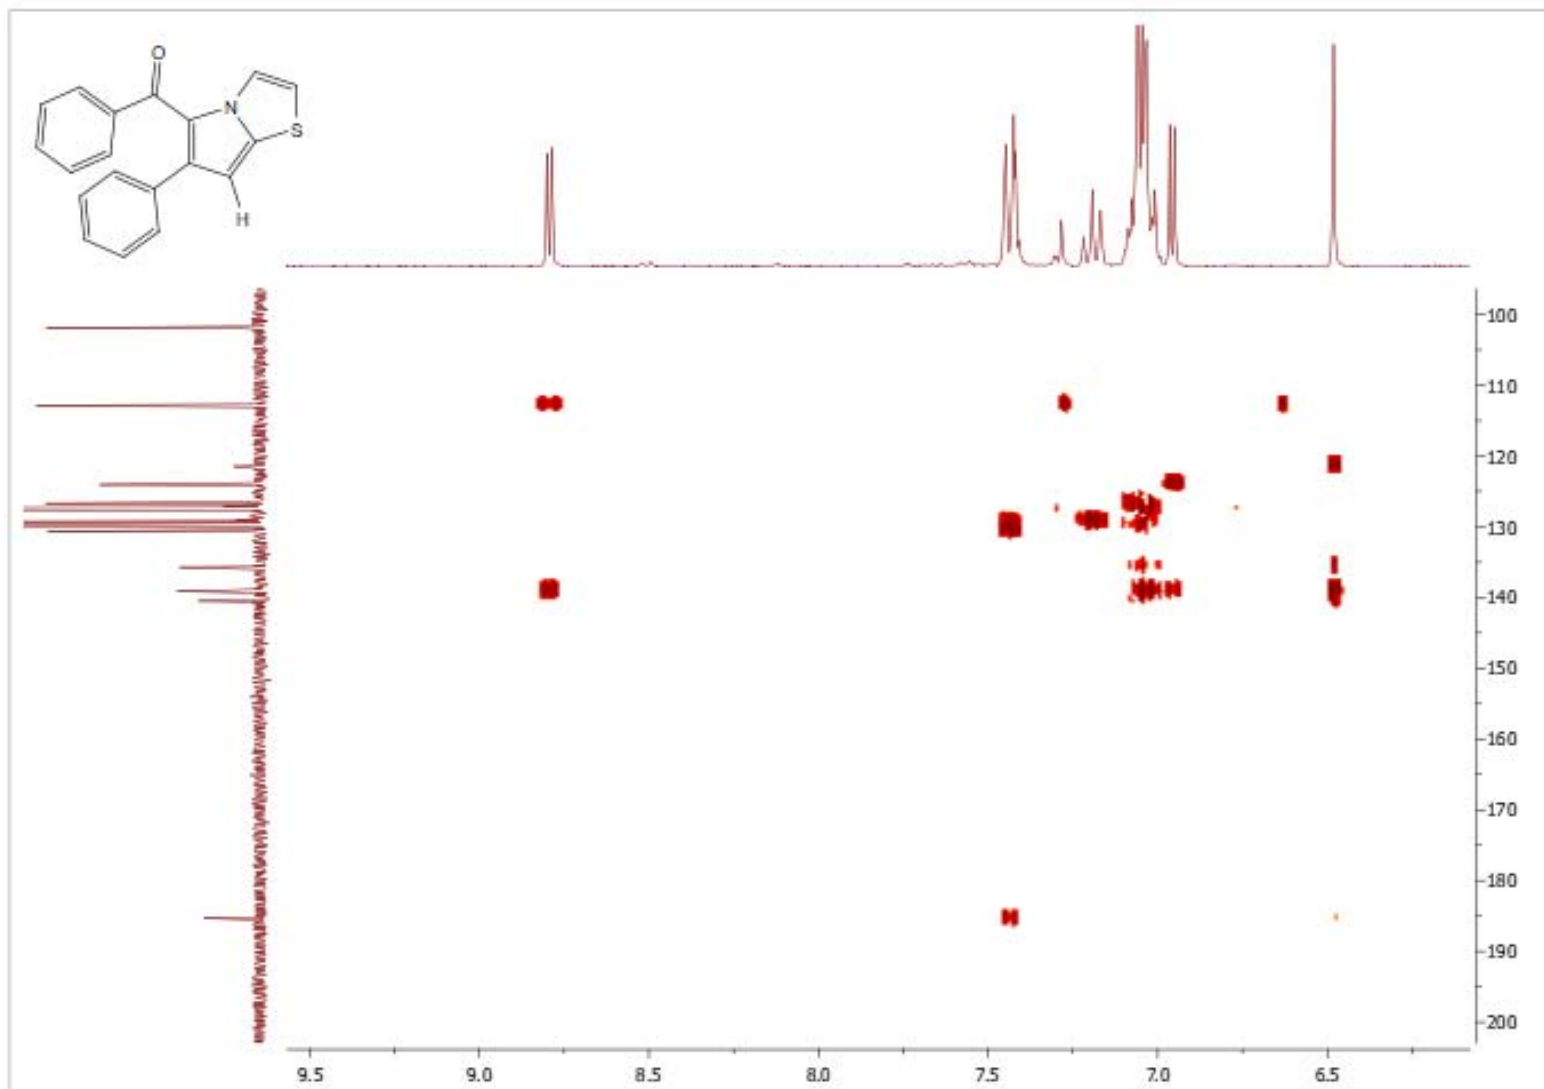

[6-(2-bromophenyl)pyrrolo[2,1-b][1,3]thiazol-5-yl](phenyl)methanone **5c**

$^1\text{H}$  NMR

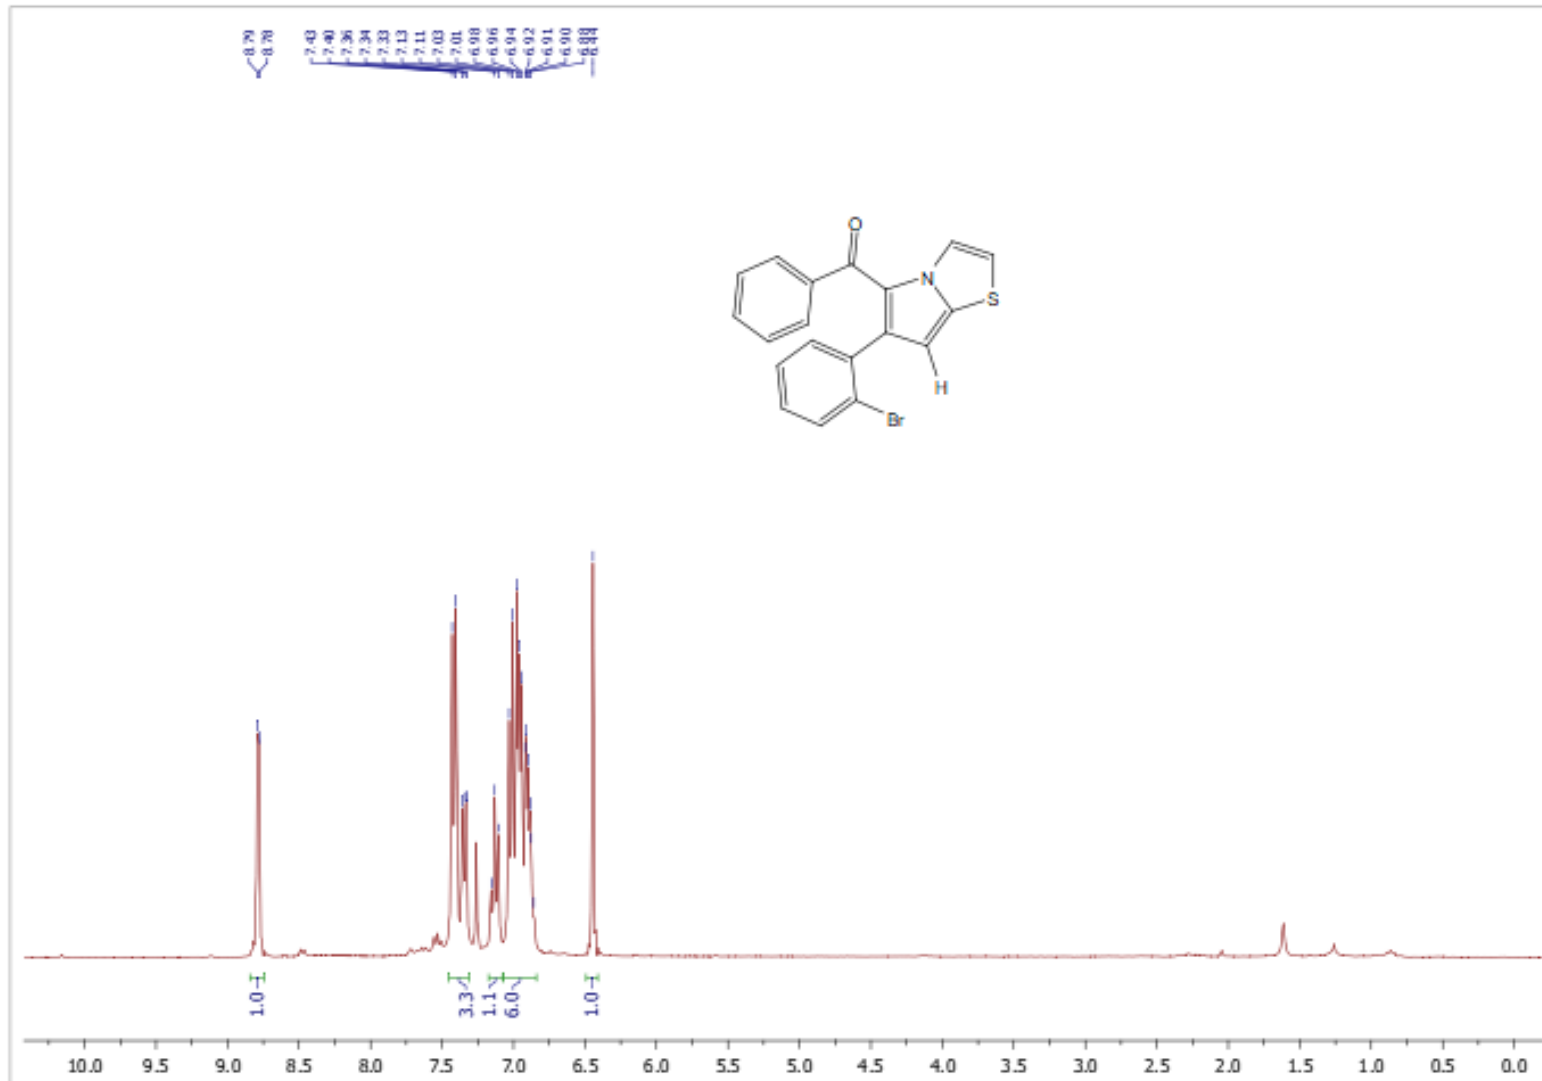

$^{13}\text{C}$  NMR

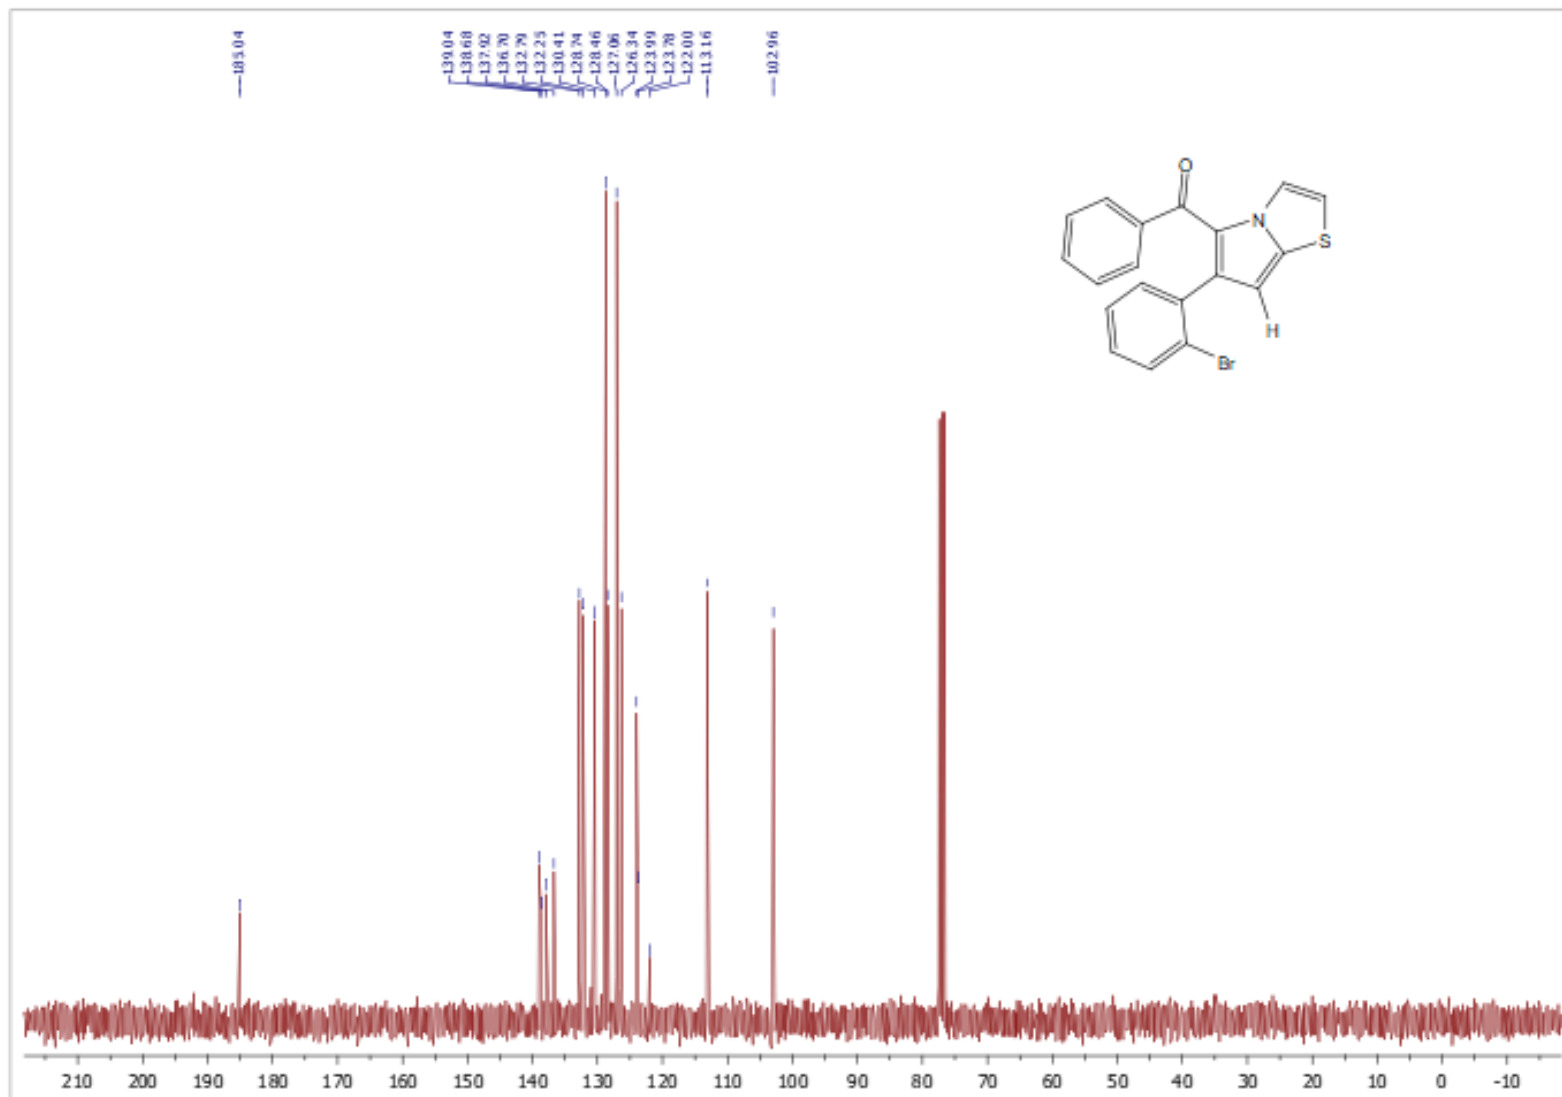



[6-(4-methoxyphenyl)pyrrolo[2,1-*b*][1,3]thiazol-5-yl](phenyl)methanone **5d**

<sup>1</sup>H NMR

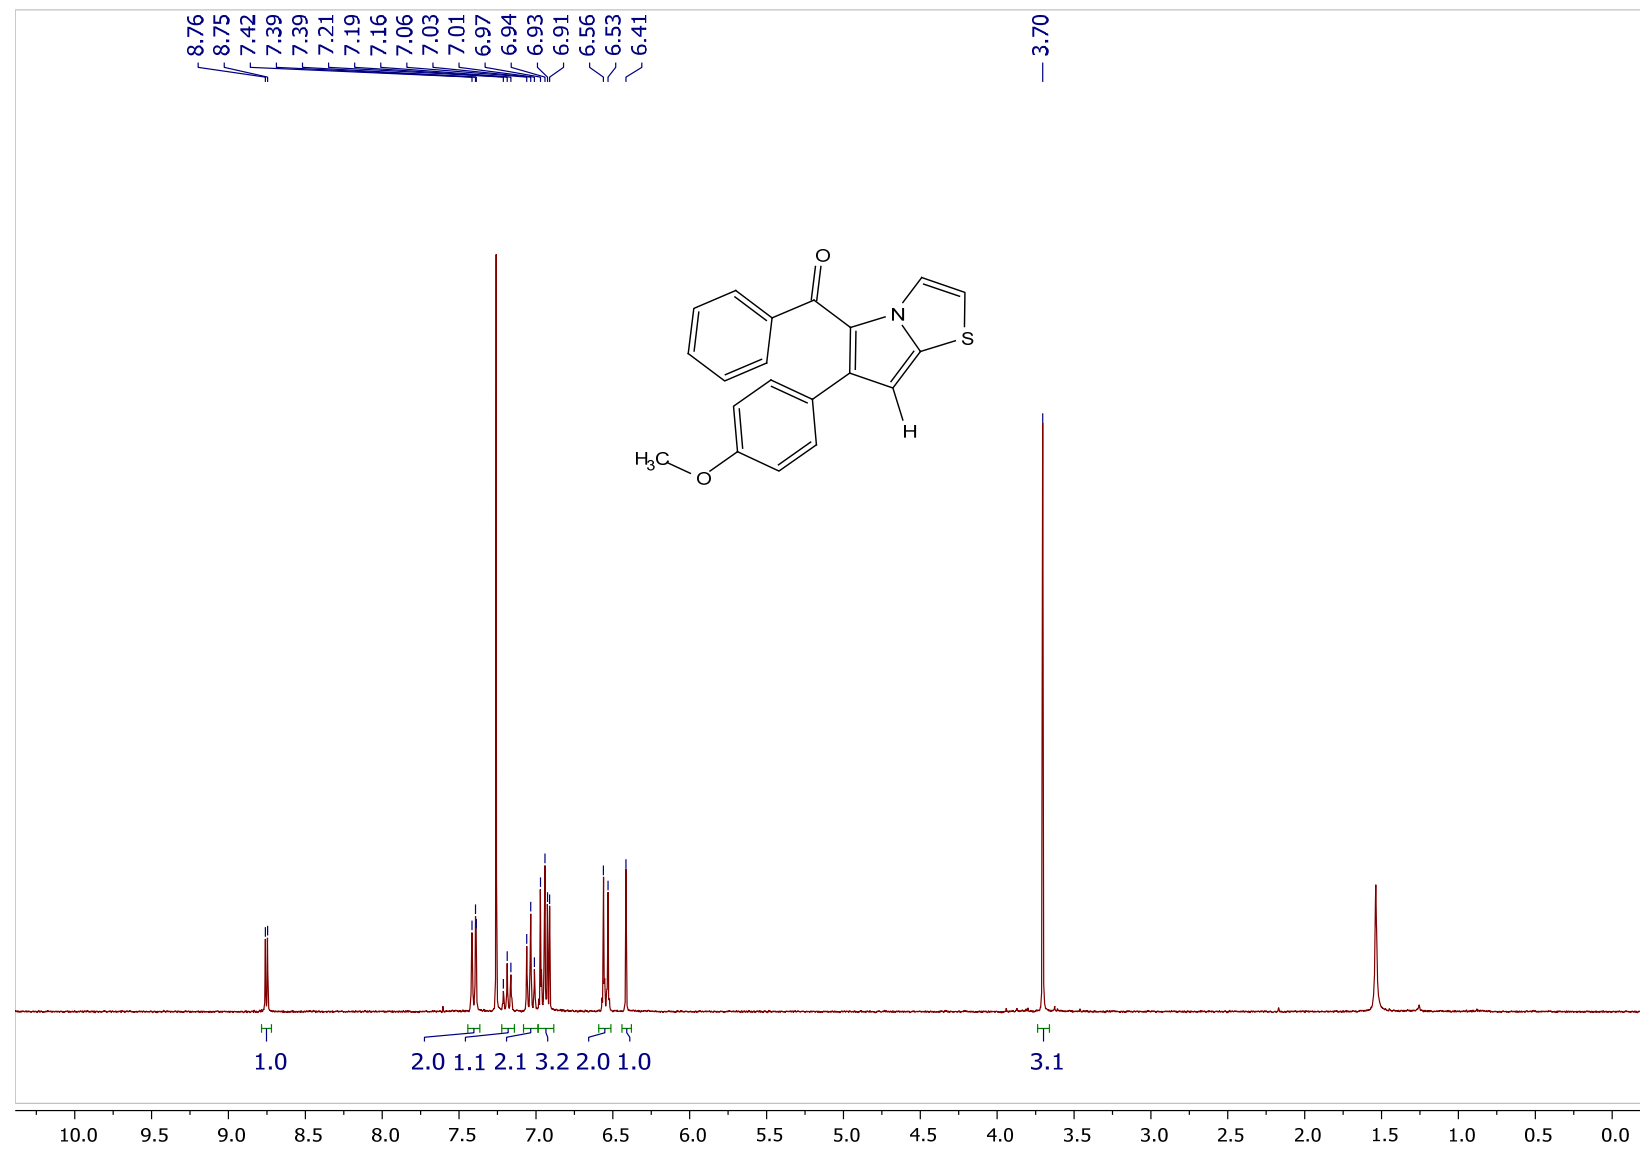

$^{13}\text{C}$  NMR

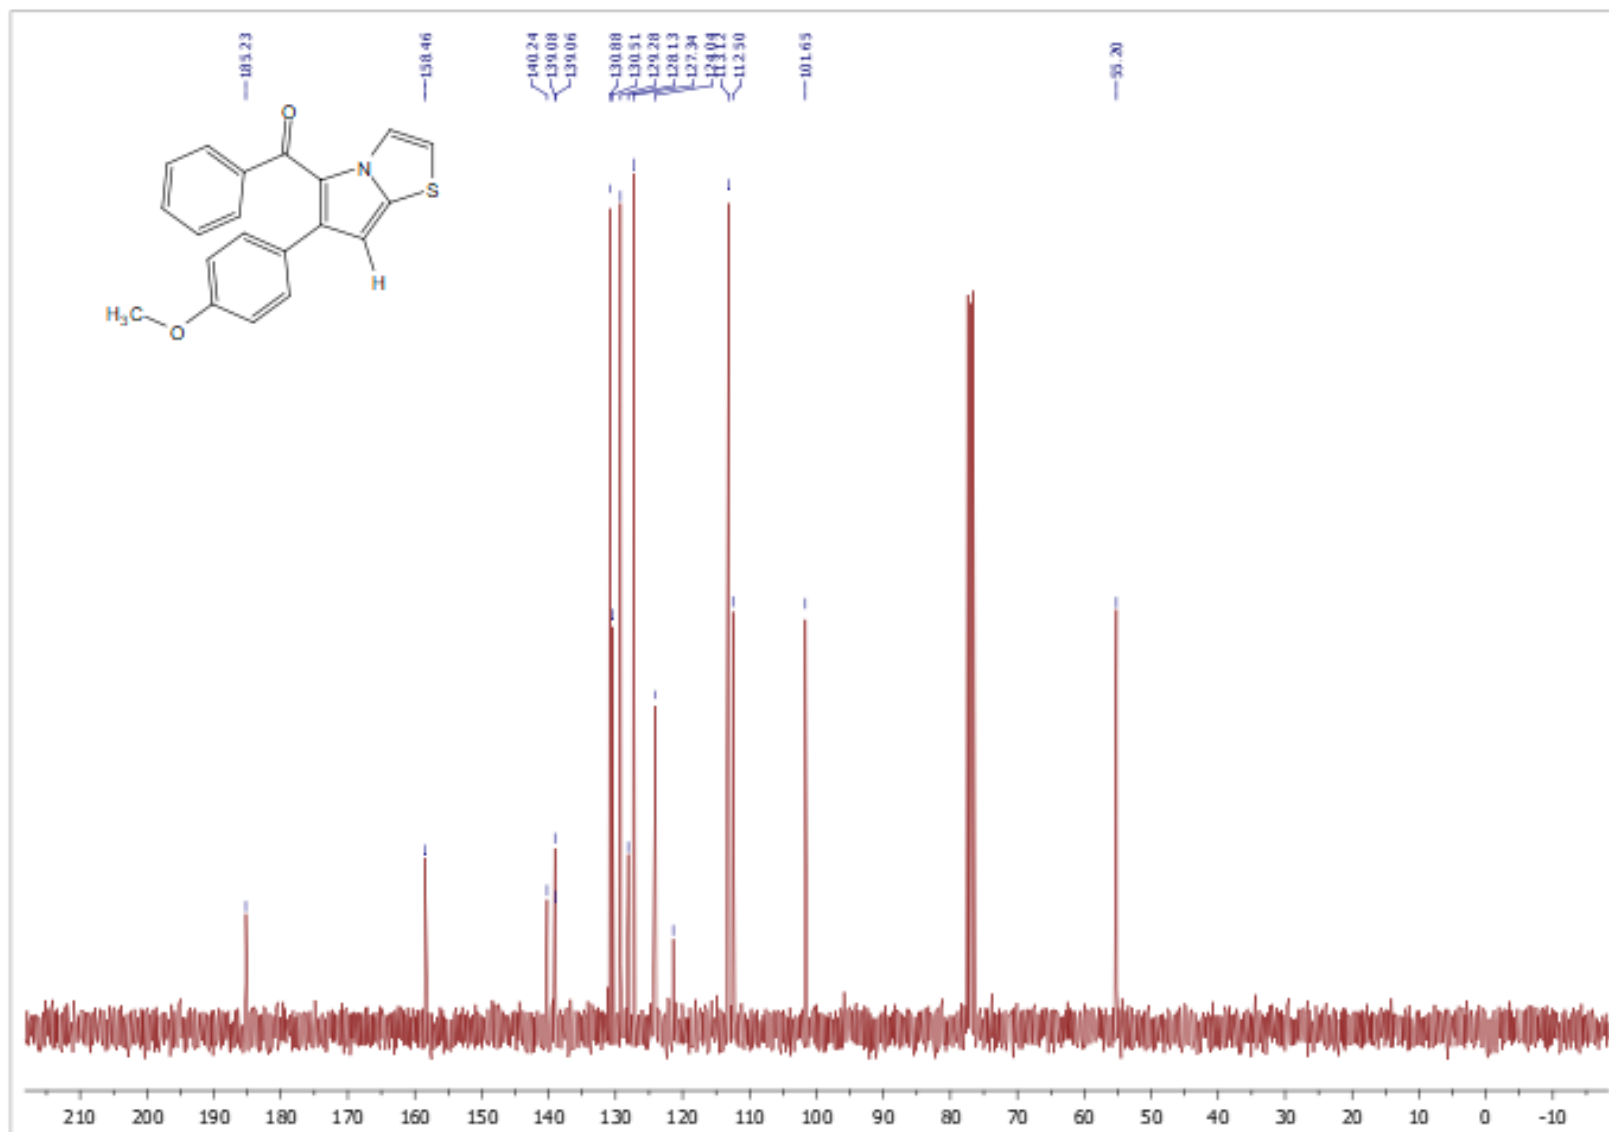

[6-(5-bromothiophen-2-yl)pyrrolo[2,1-*b*][1,3]thiazol-5-yl](phenyl)methanone **5e**

$^1\text{H}$  NMR

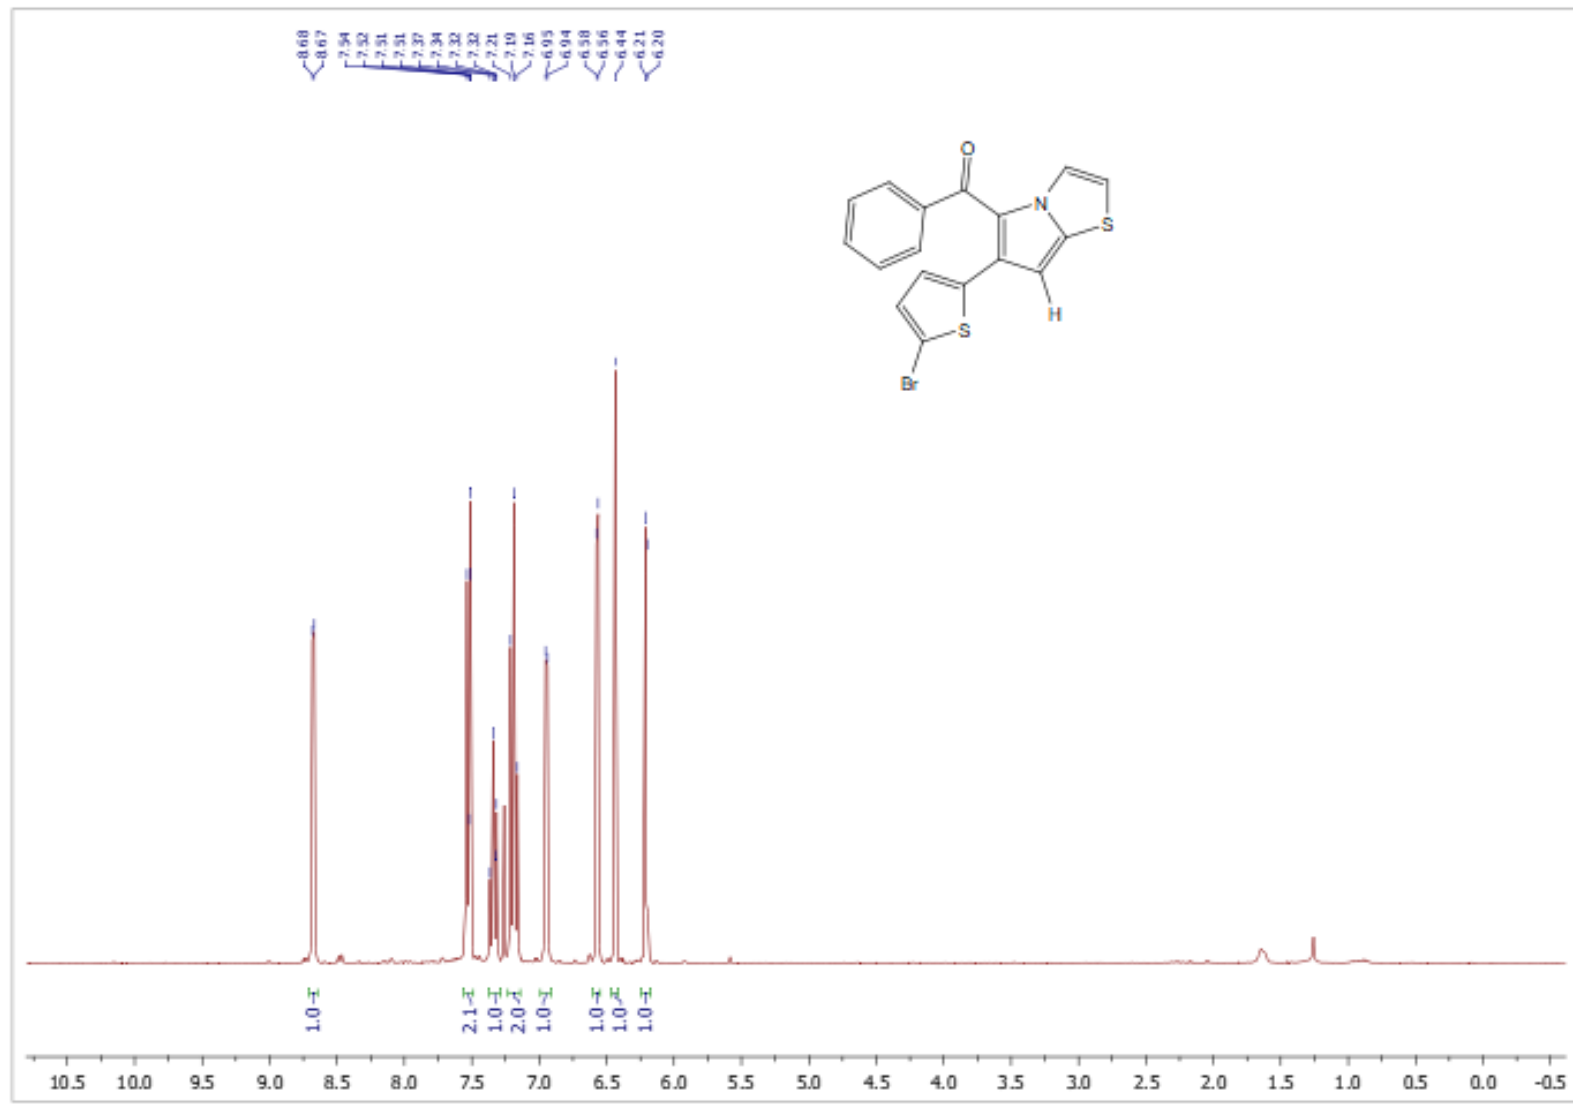

$^{13}\text{C}$  NMR

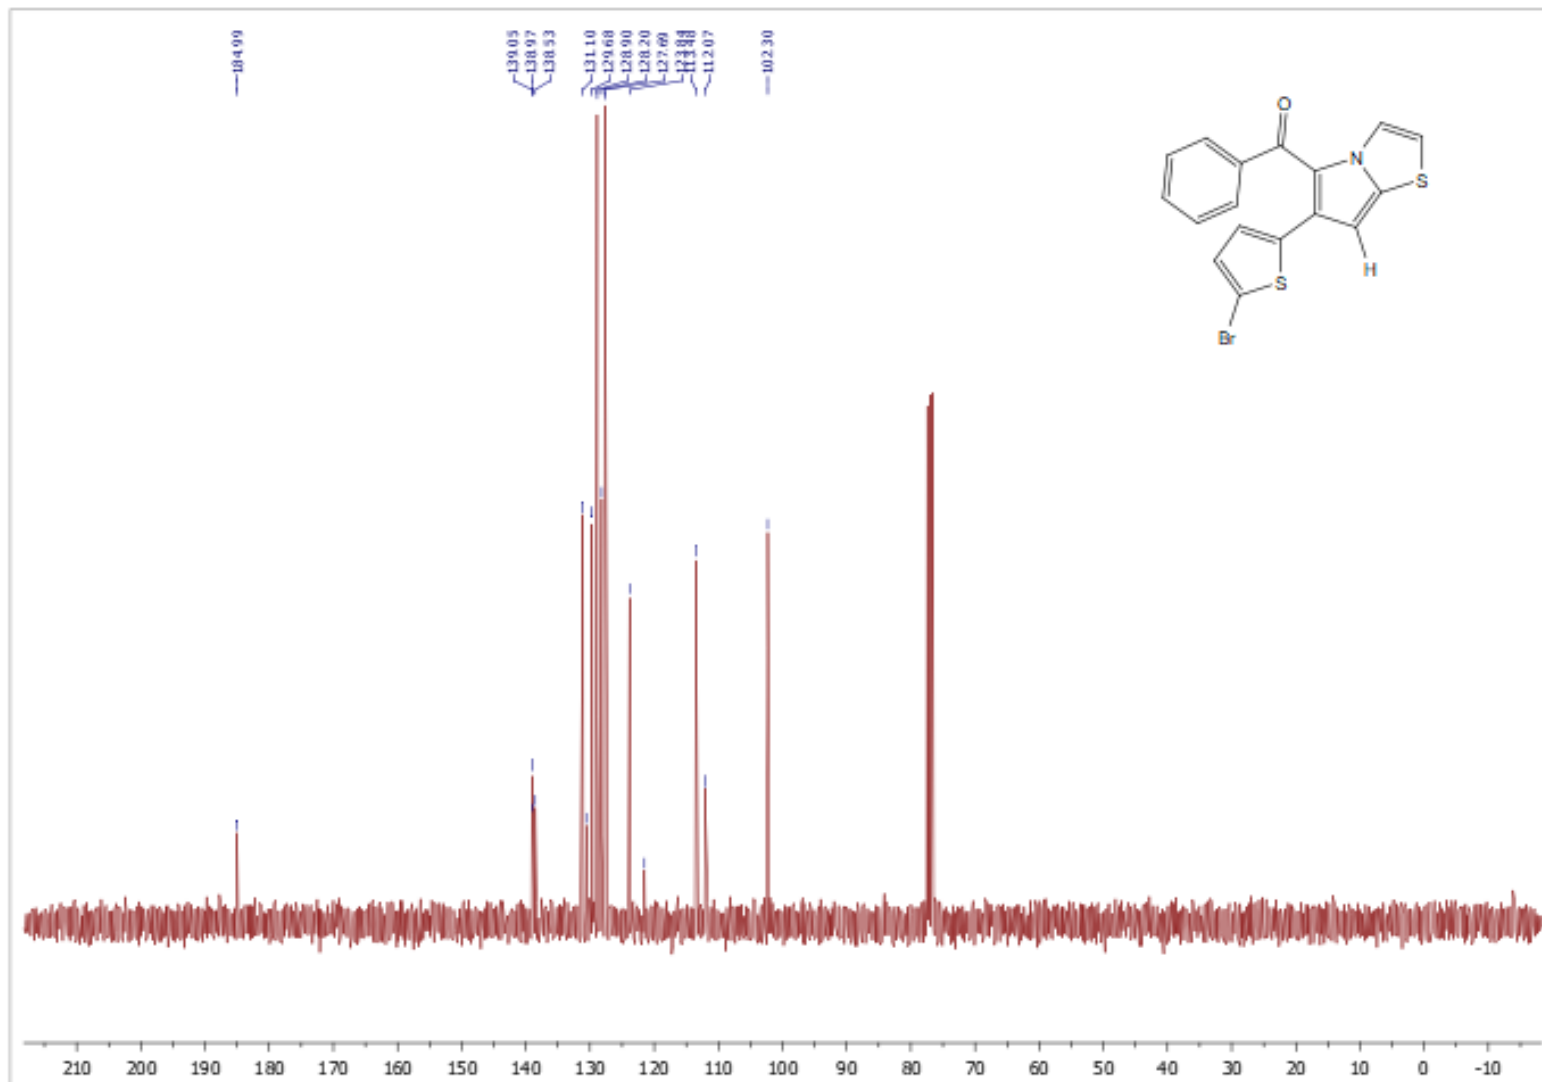

$^1\text{H}$ - $^1\text{H}$  COSY NMR

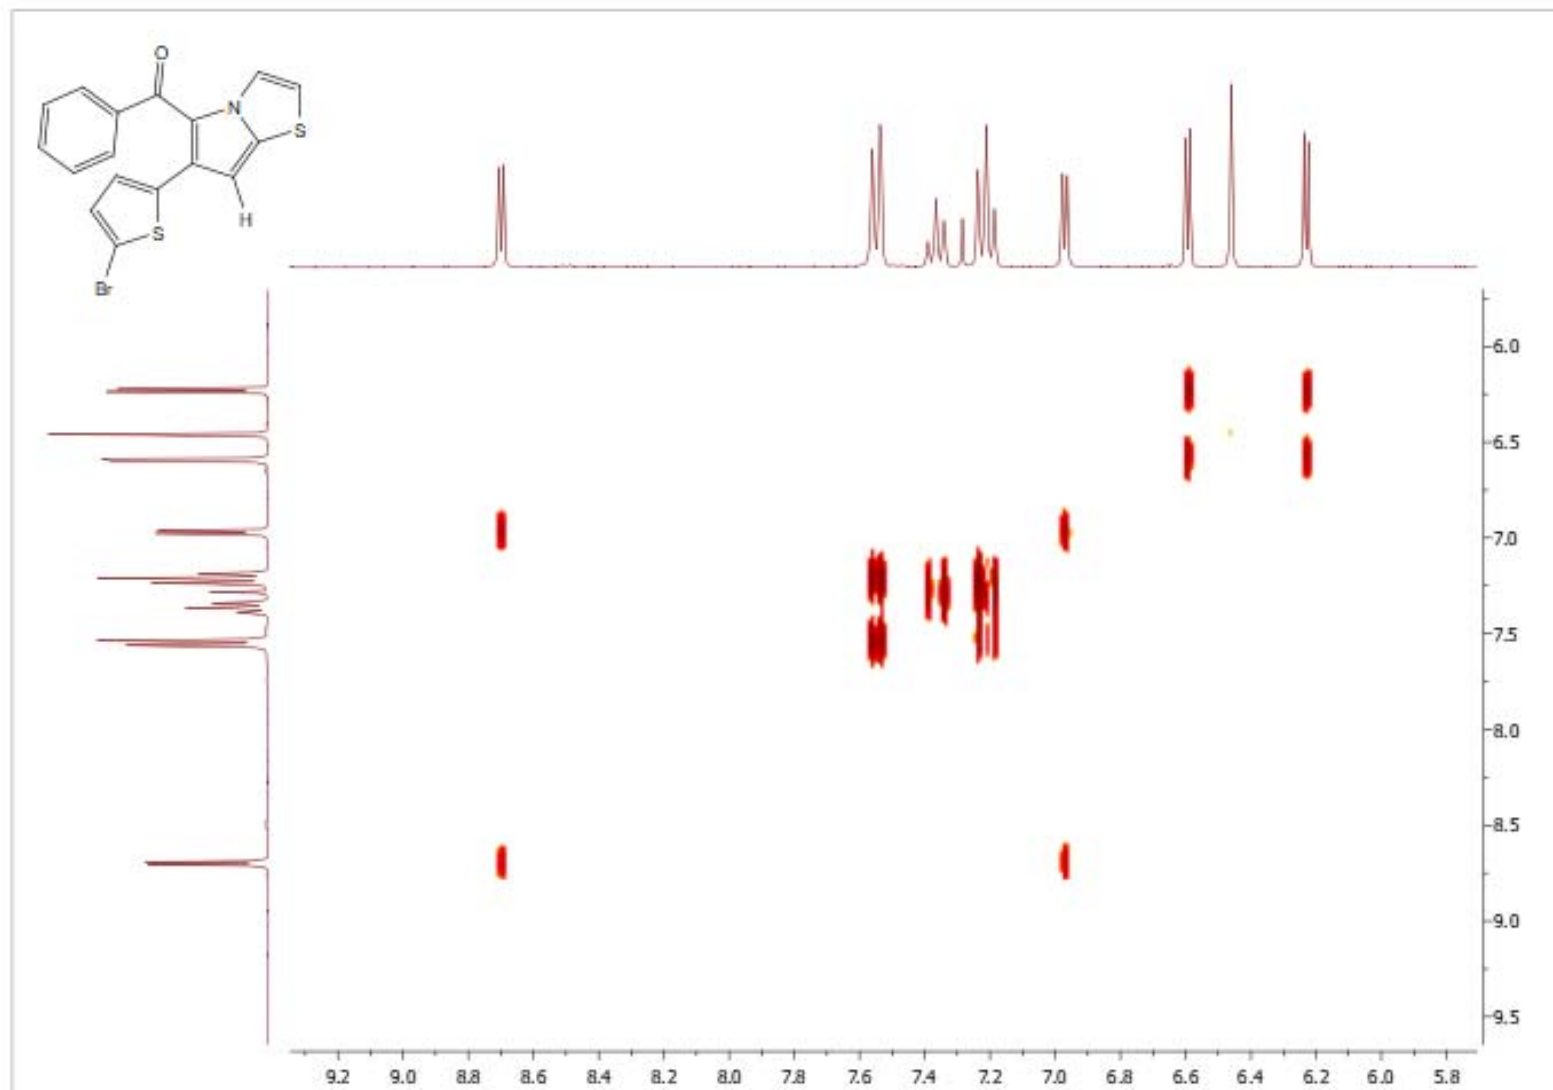

$^1\text{H}$ - $^{13}\text{C}$  HSQC NMR

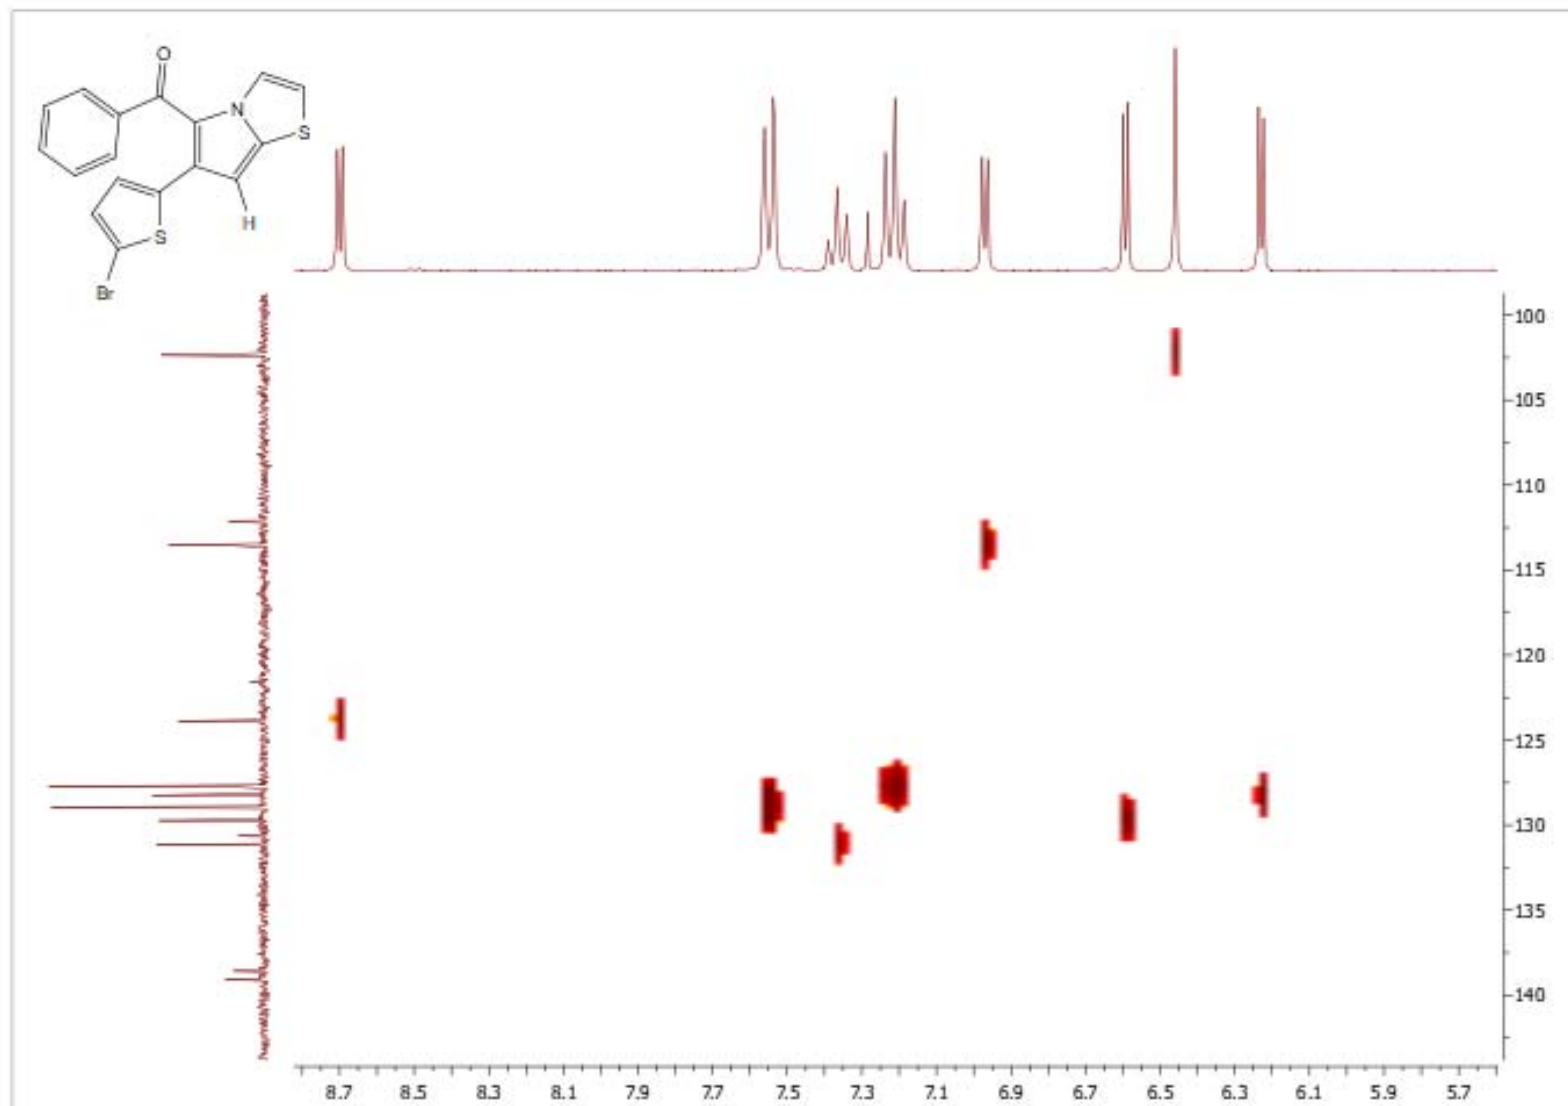

phenyl[6-(2-phenylethyl)pyrrolo[2,1-*b*][1,3]thiazol-5-yl]methanone **5f**

$^1\text{H}$  NMR

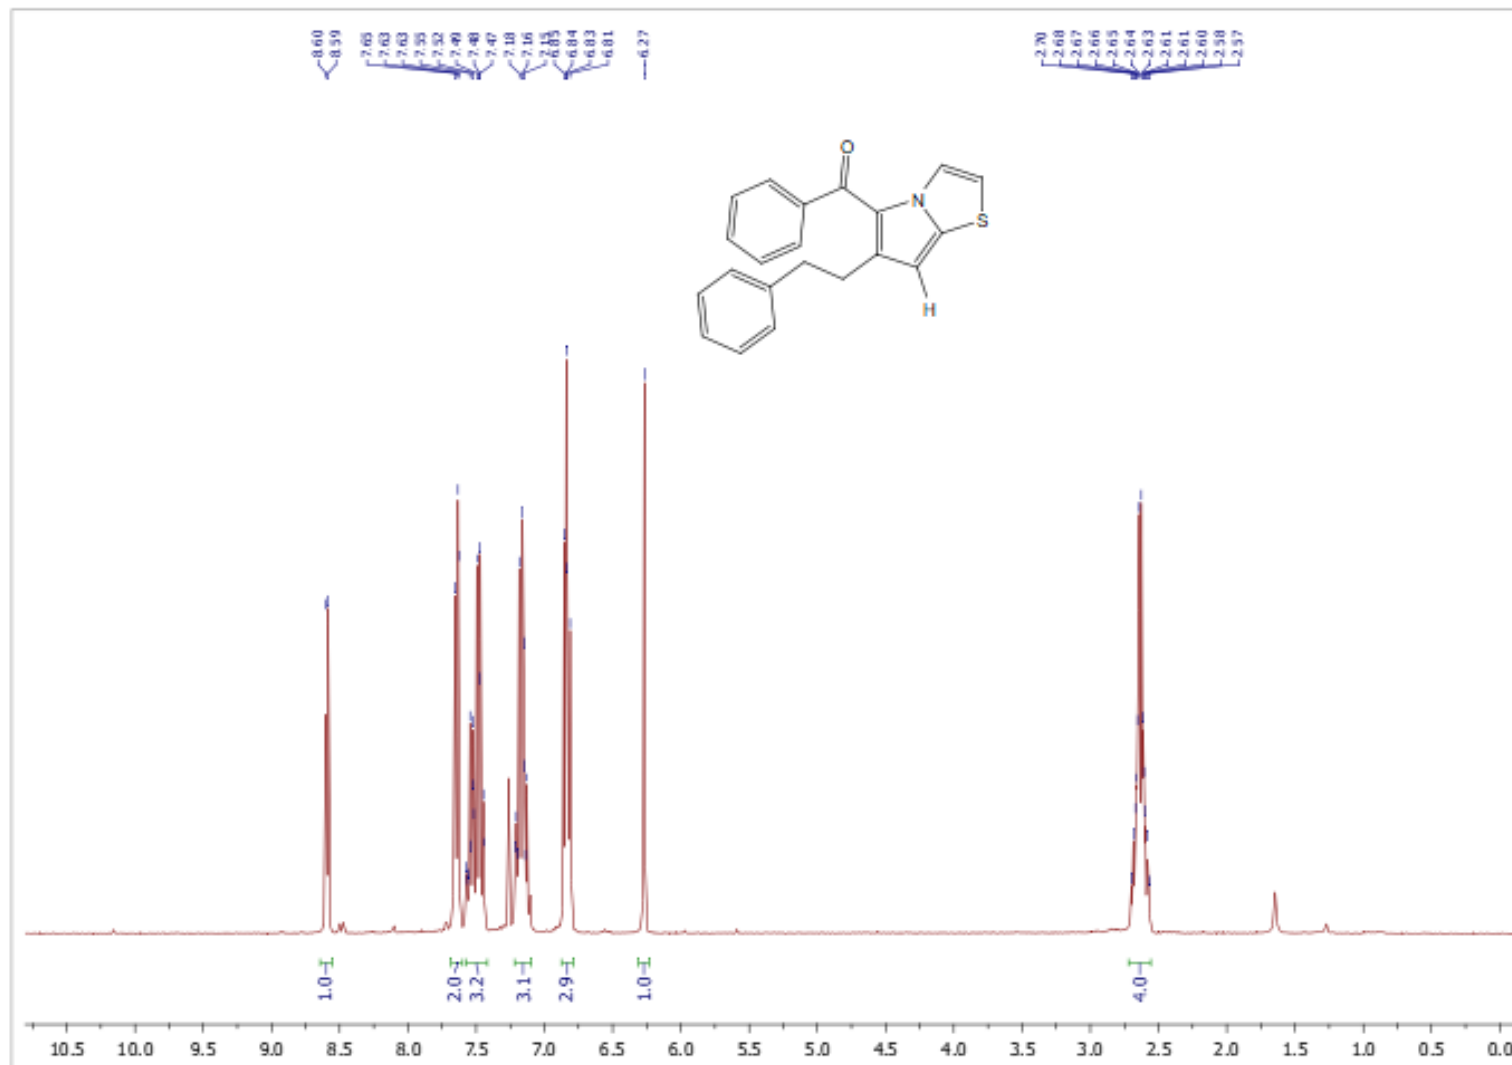

$^{13}\text{C}$  NMR

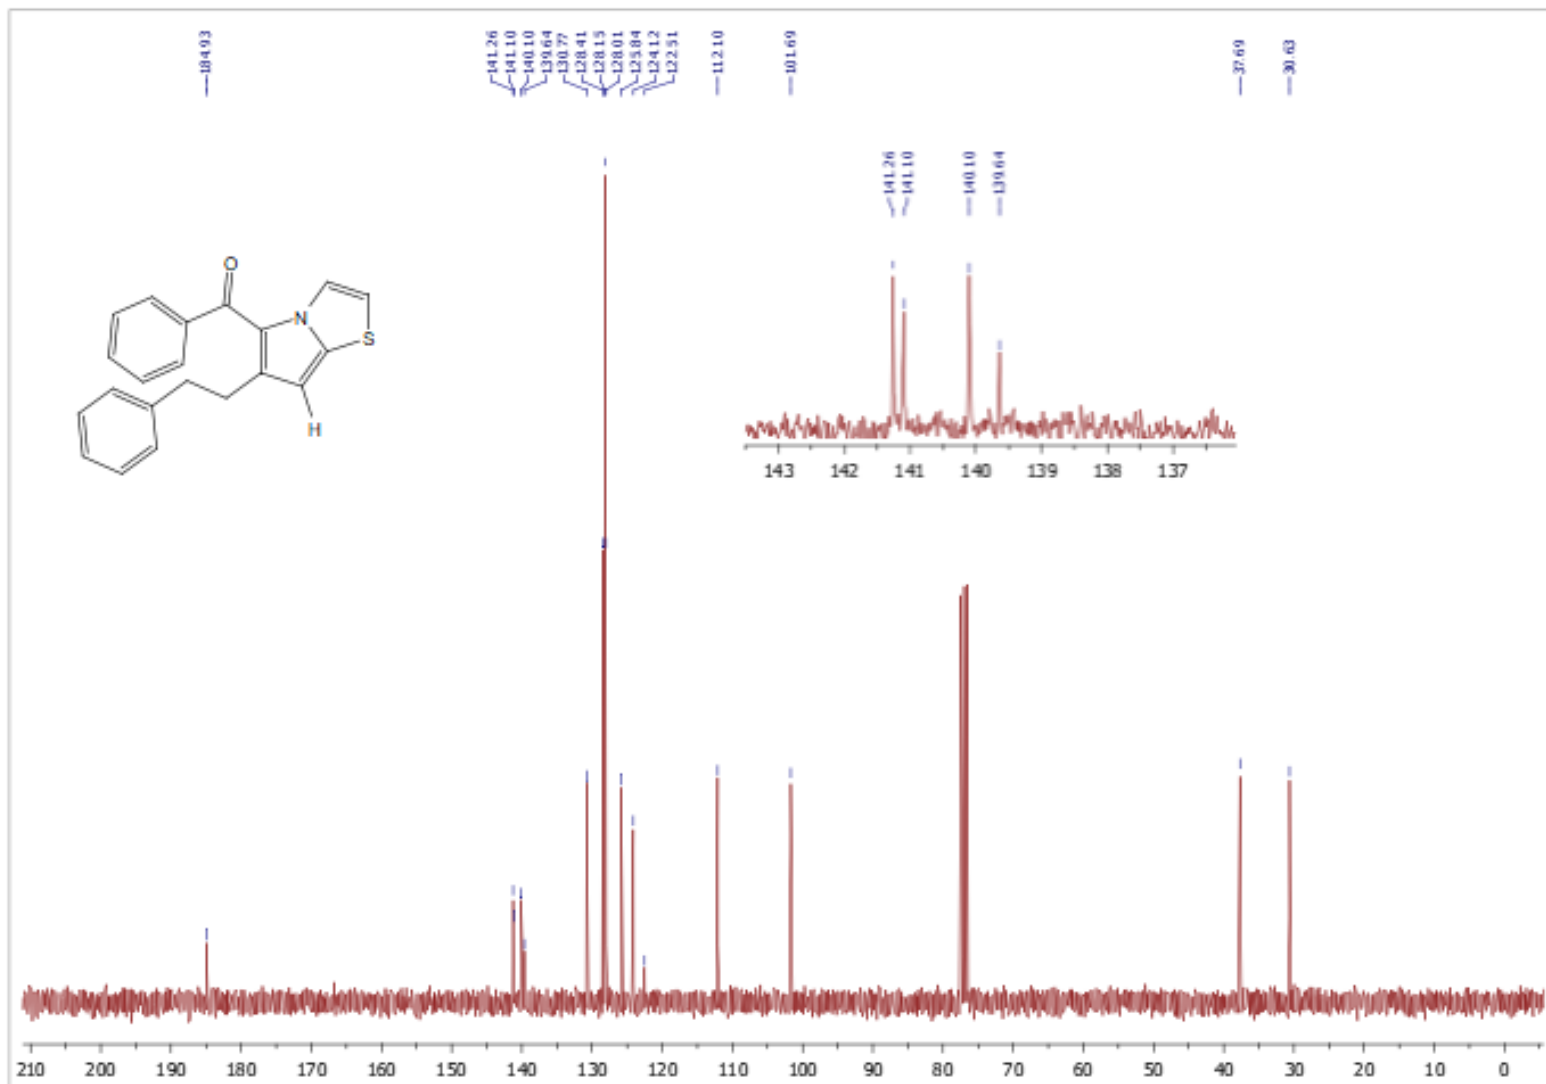



$^1\text{H}$ - $^{13}\text{C}$  HMBC NMR

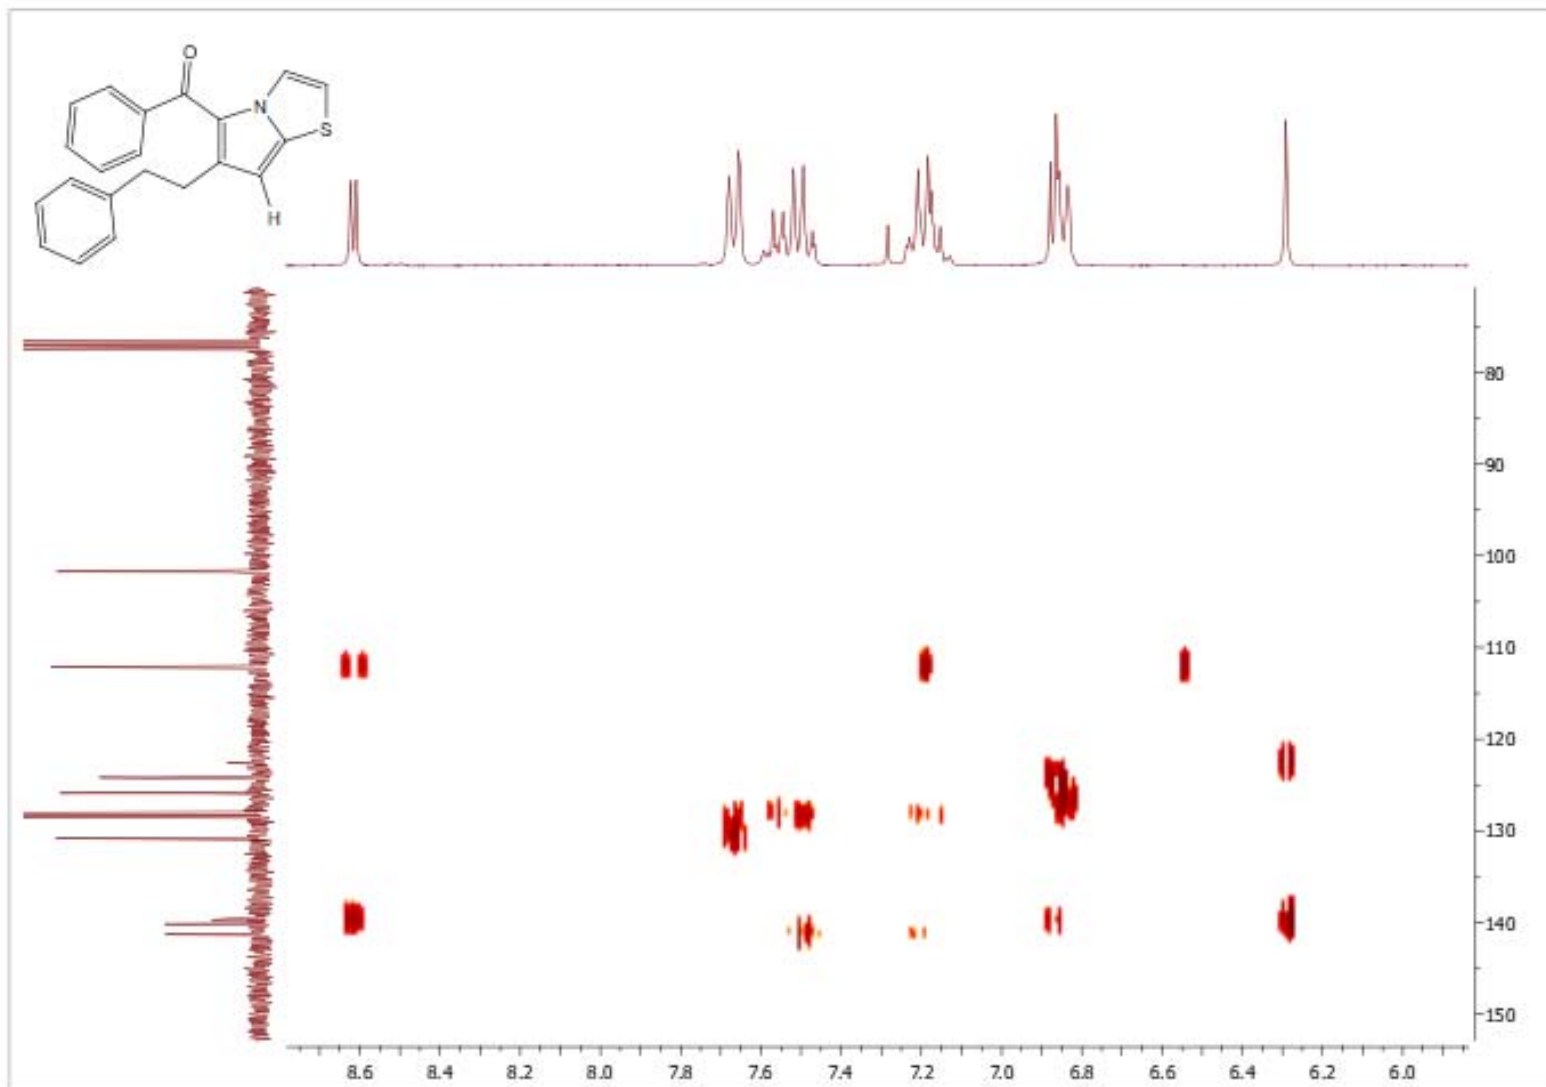

[2-(4-chlorophenyl)-1-fluoro-5-methyl-5H-pyrrolo[1,2-b]indazol-3-yl](phenyl)methanone **7a**

<sup>1</sup>H NMR

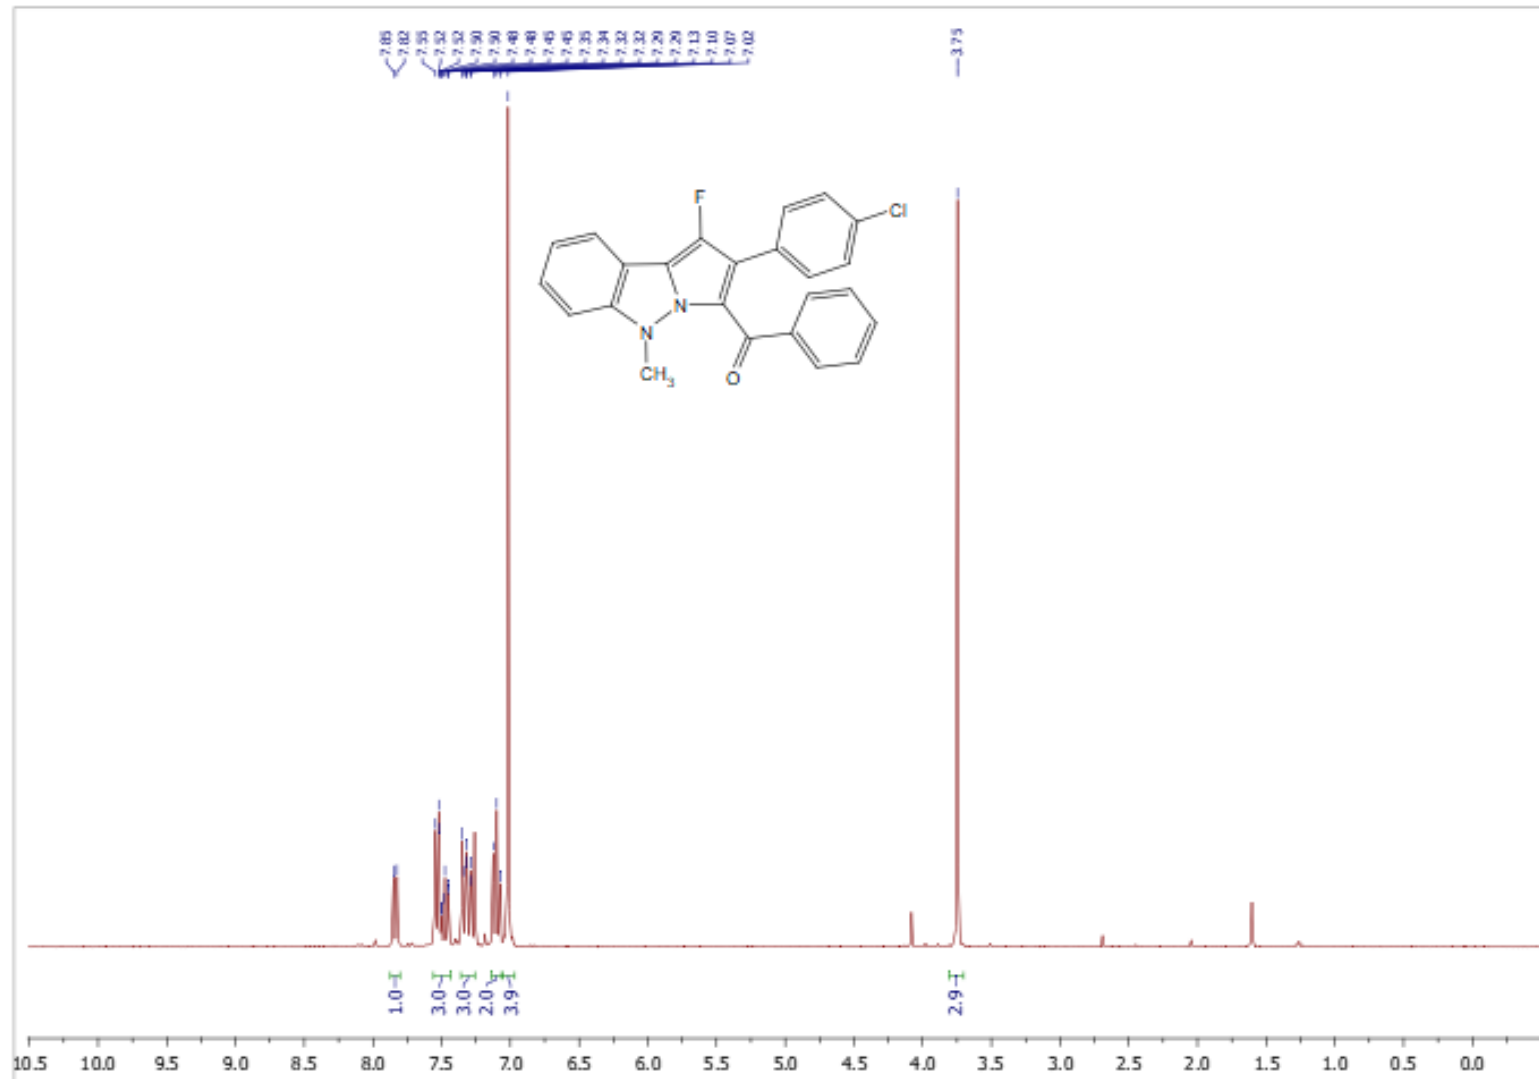

$^{13}\text{C}$  NMR

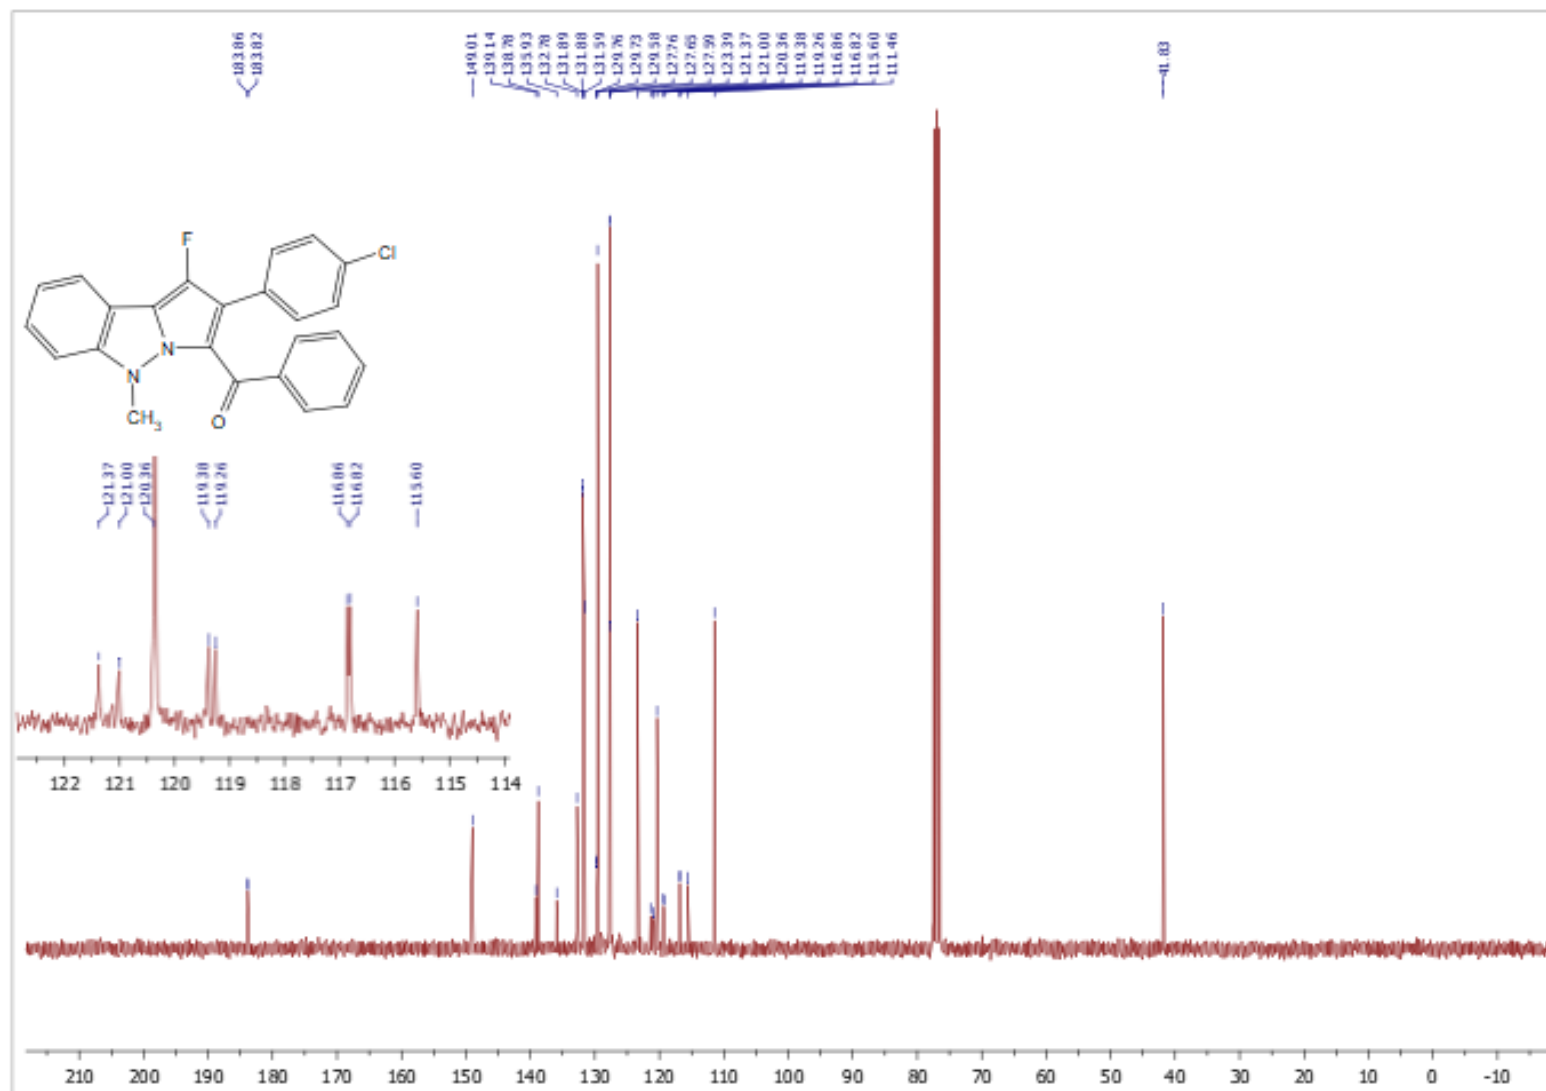

$^{19}\text{F}$  NMR

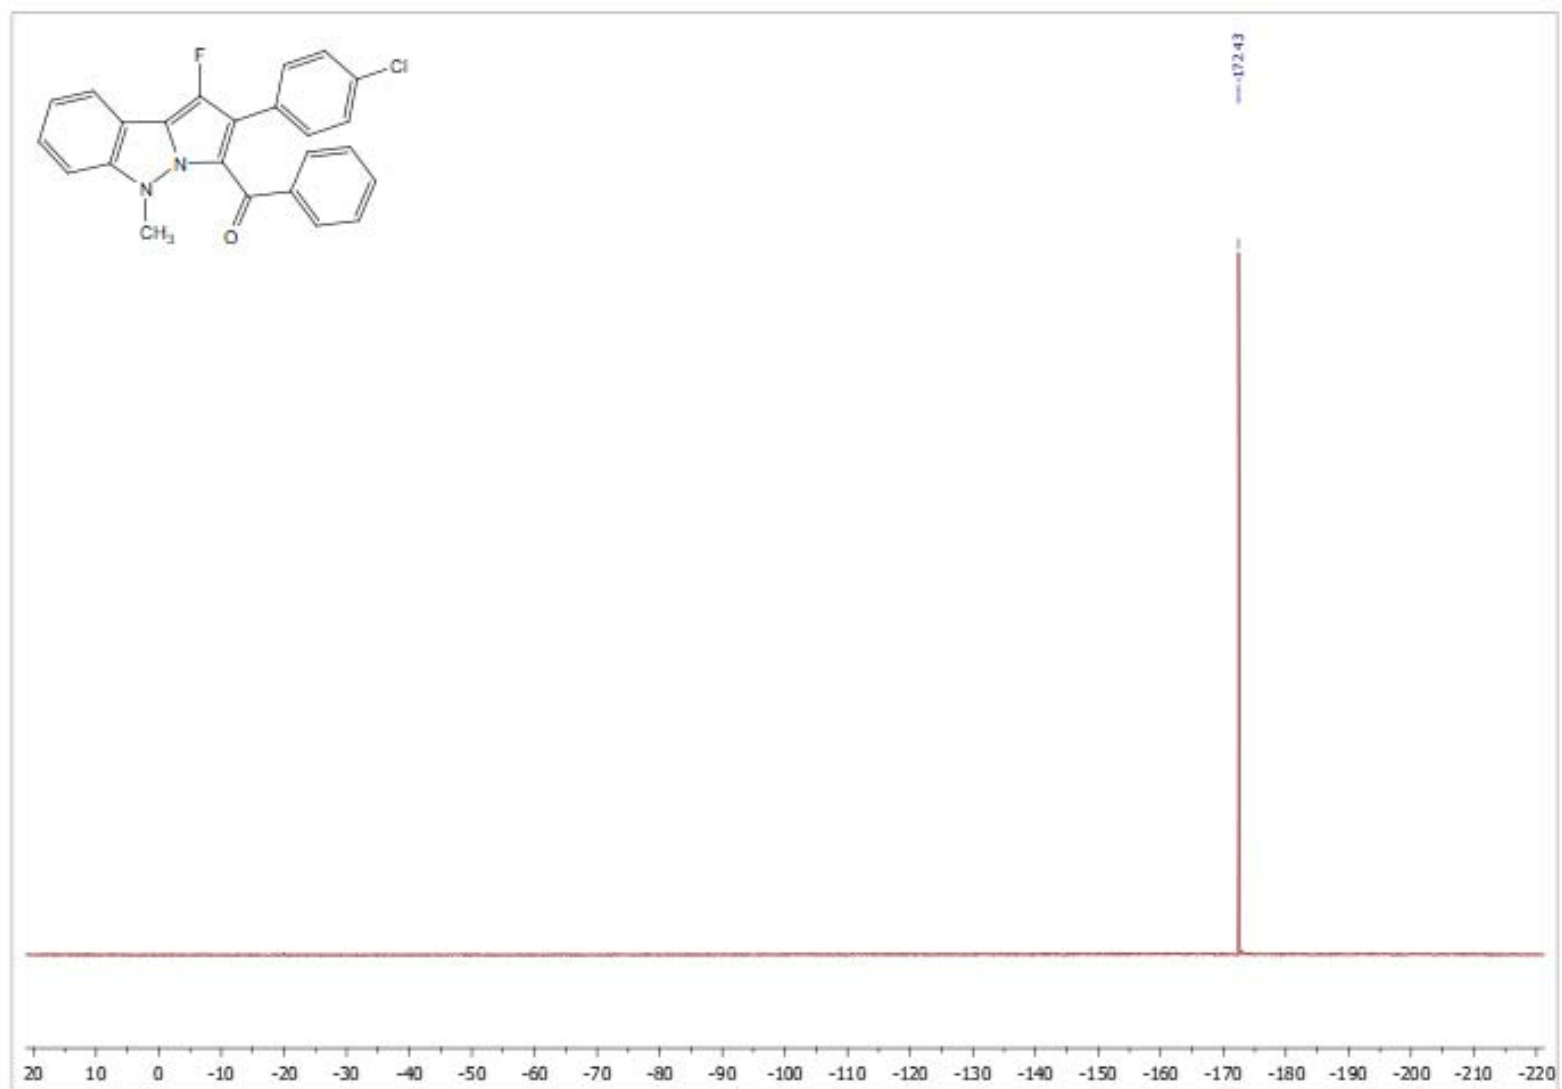

[2-(2-chlorophenyl)-1-fluoro-5-methyl-5H-pyrrolo[1,2-b]indazol-3-yl](phenyl)methanone **7b**

<sup>1</sup>H NMR

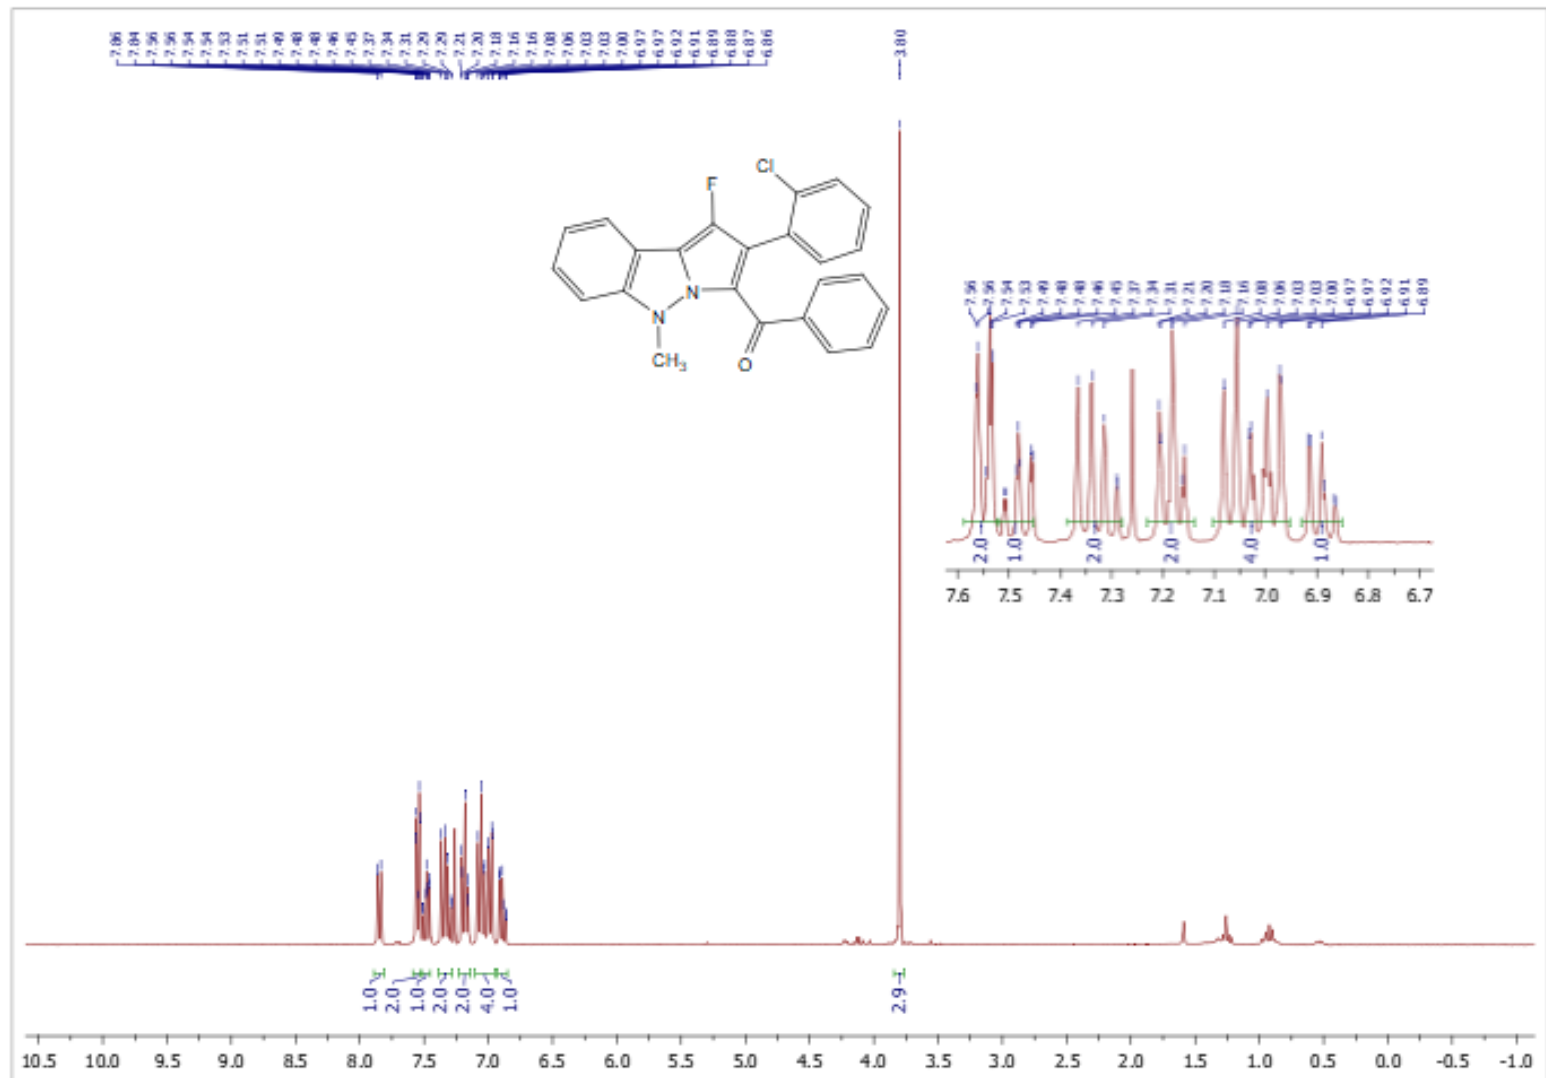

$^{13}\text{C}$  NMR

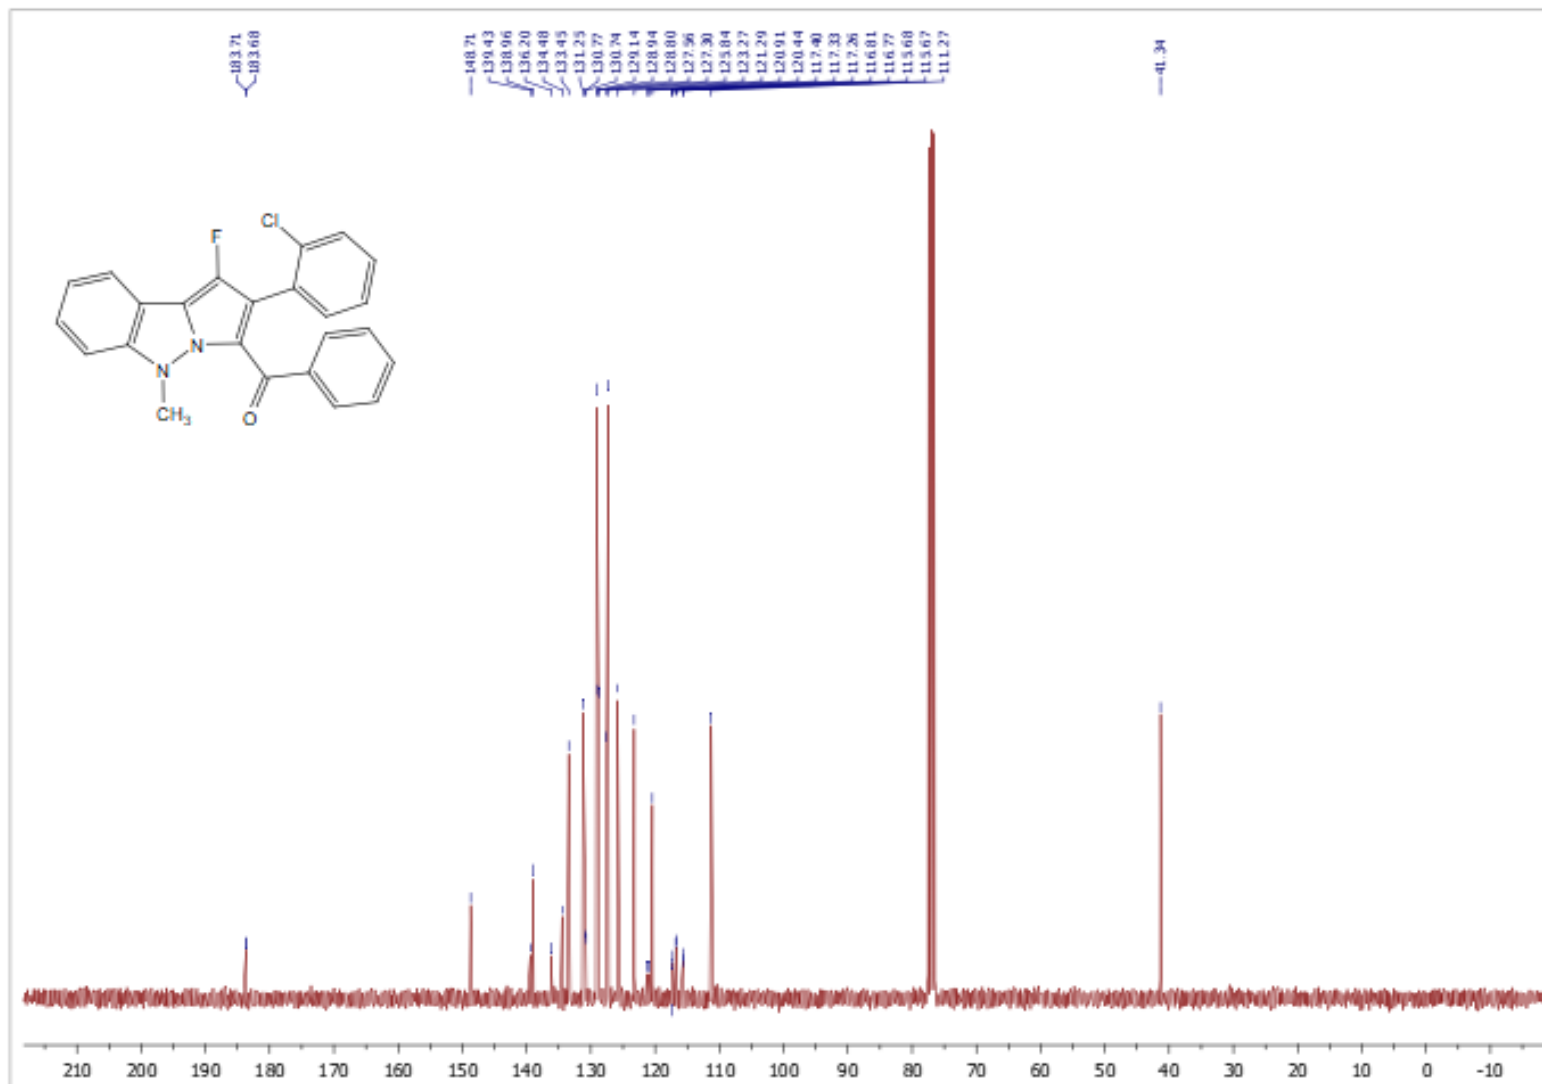

$^{19}\text{F}$  NMR

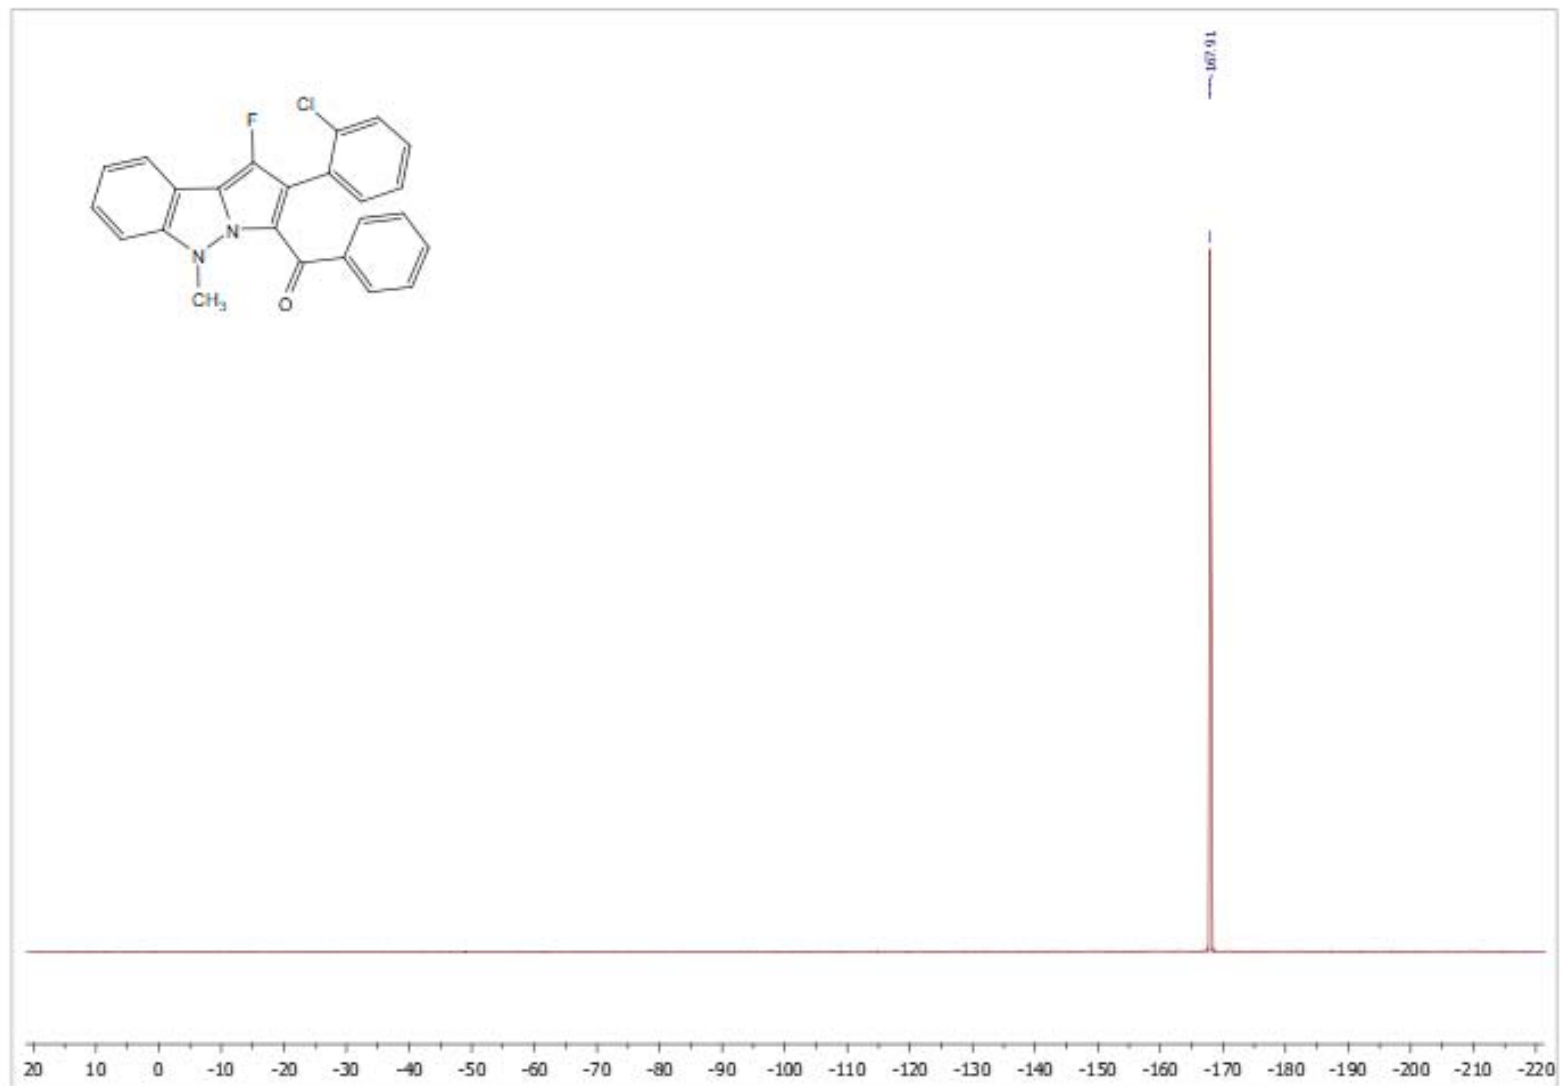

[1-fluoro-2-(4-methoxyphenyl)-5-methyl-5H-pyrrolo[1,2-b]indazol-3-yl](phenyl)methanone **7c**

<sup>1</sup>H NMR

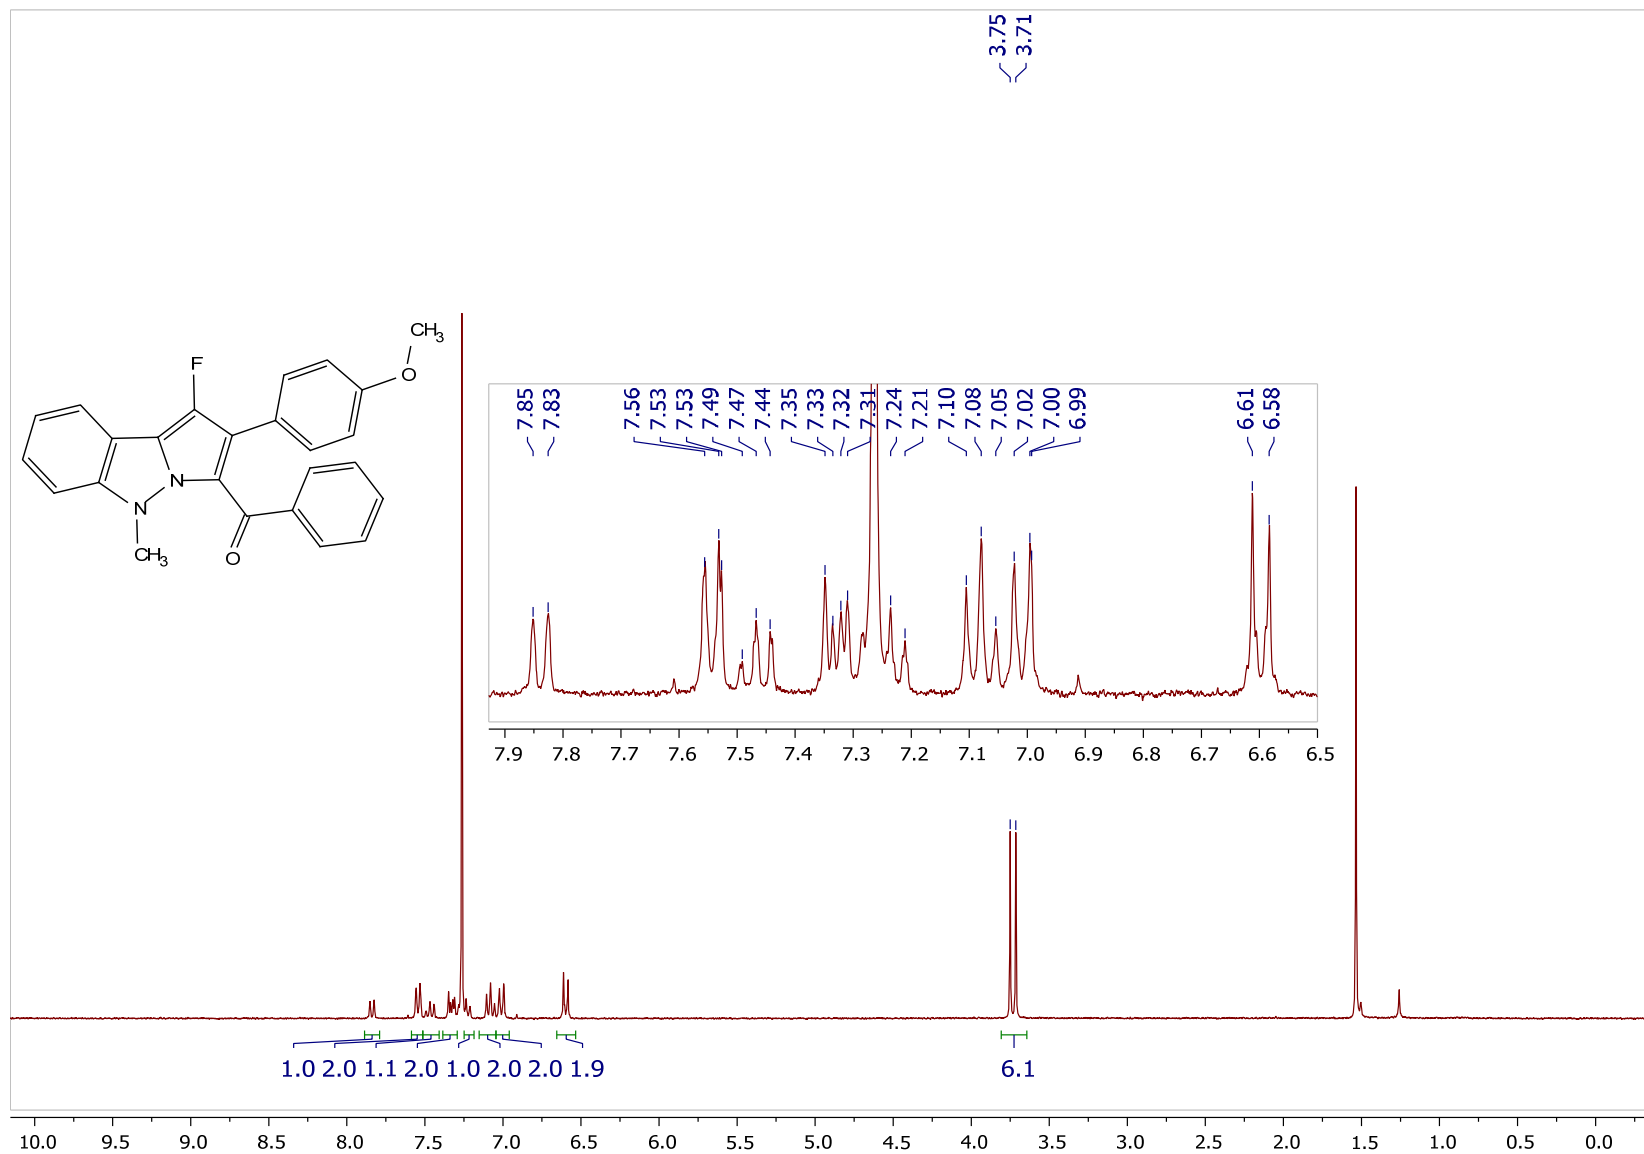



$^{13}\text{C}$  NMR

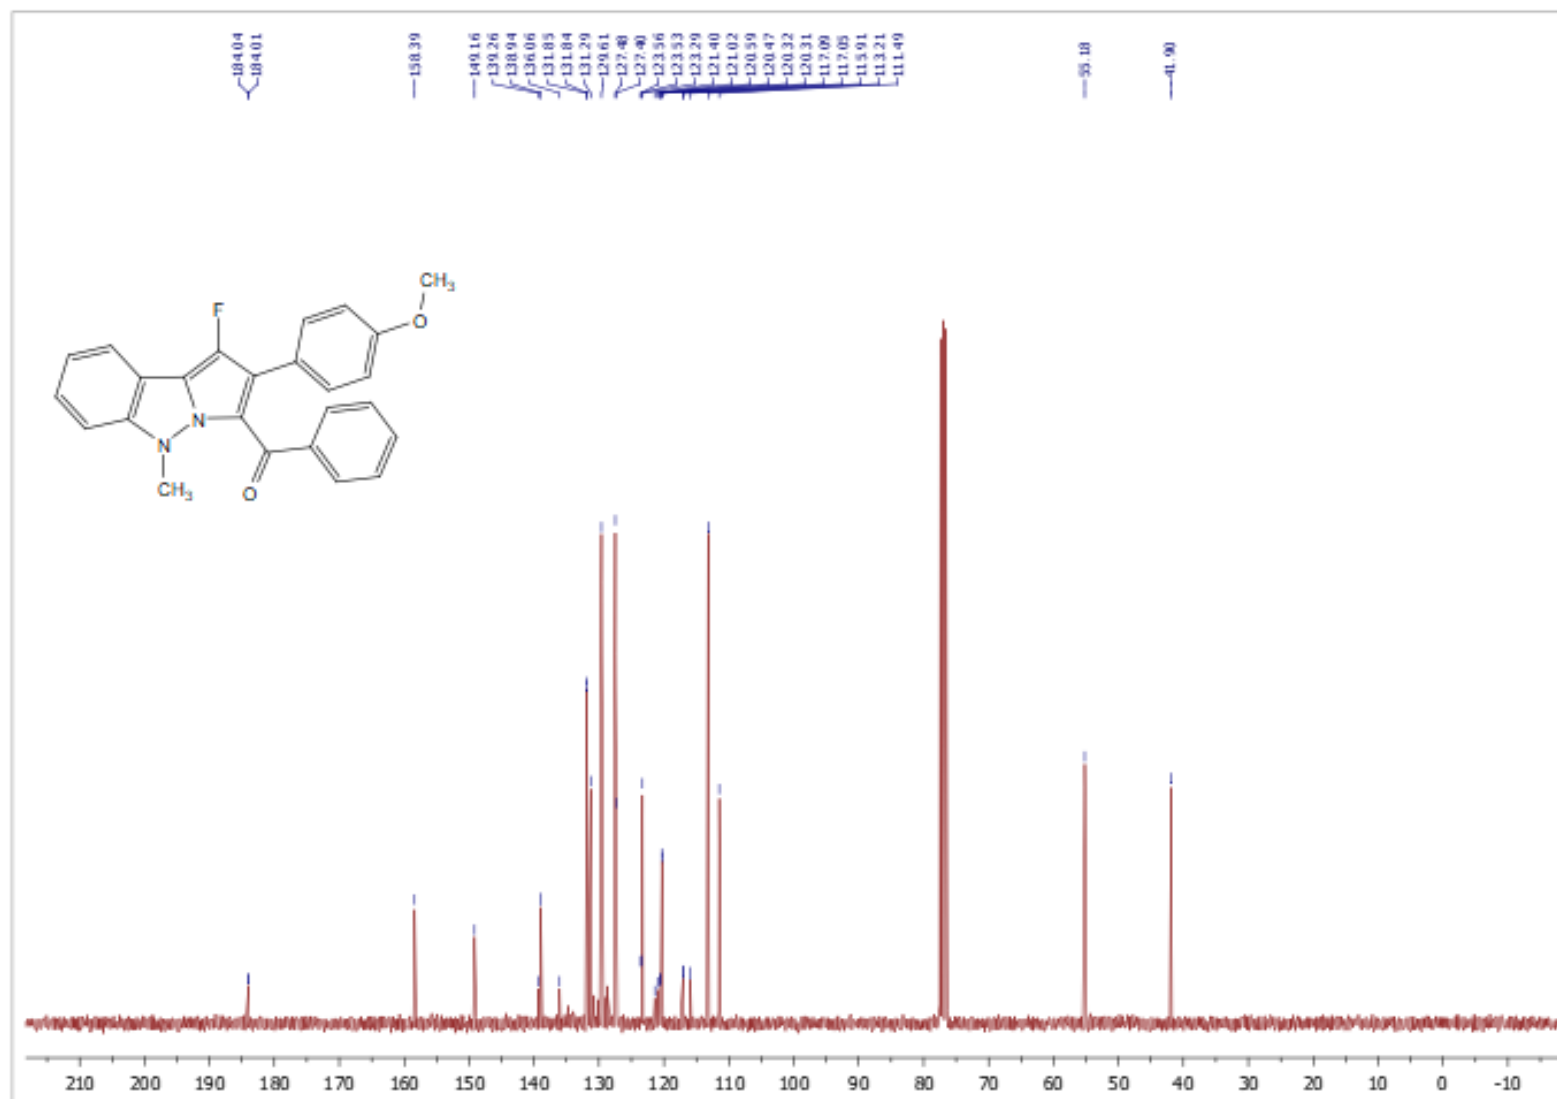

$^{19}\text{F}$  NMR

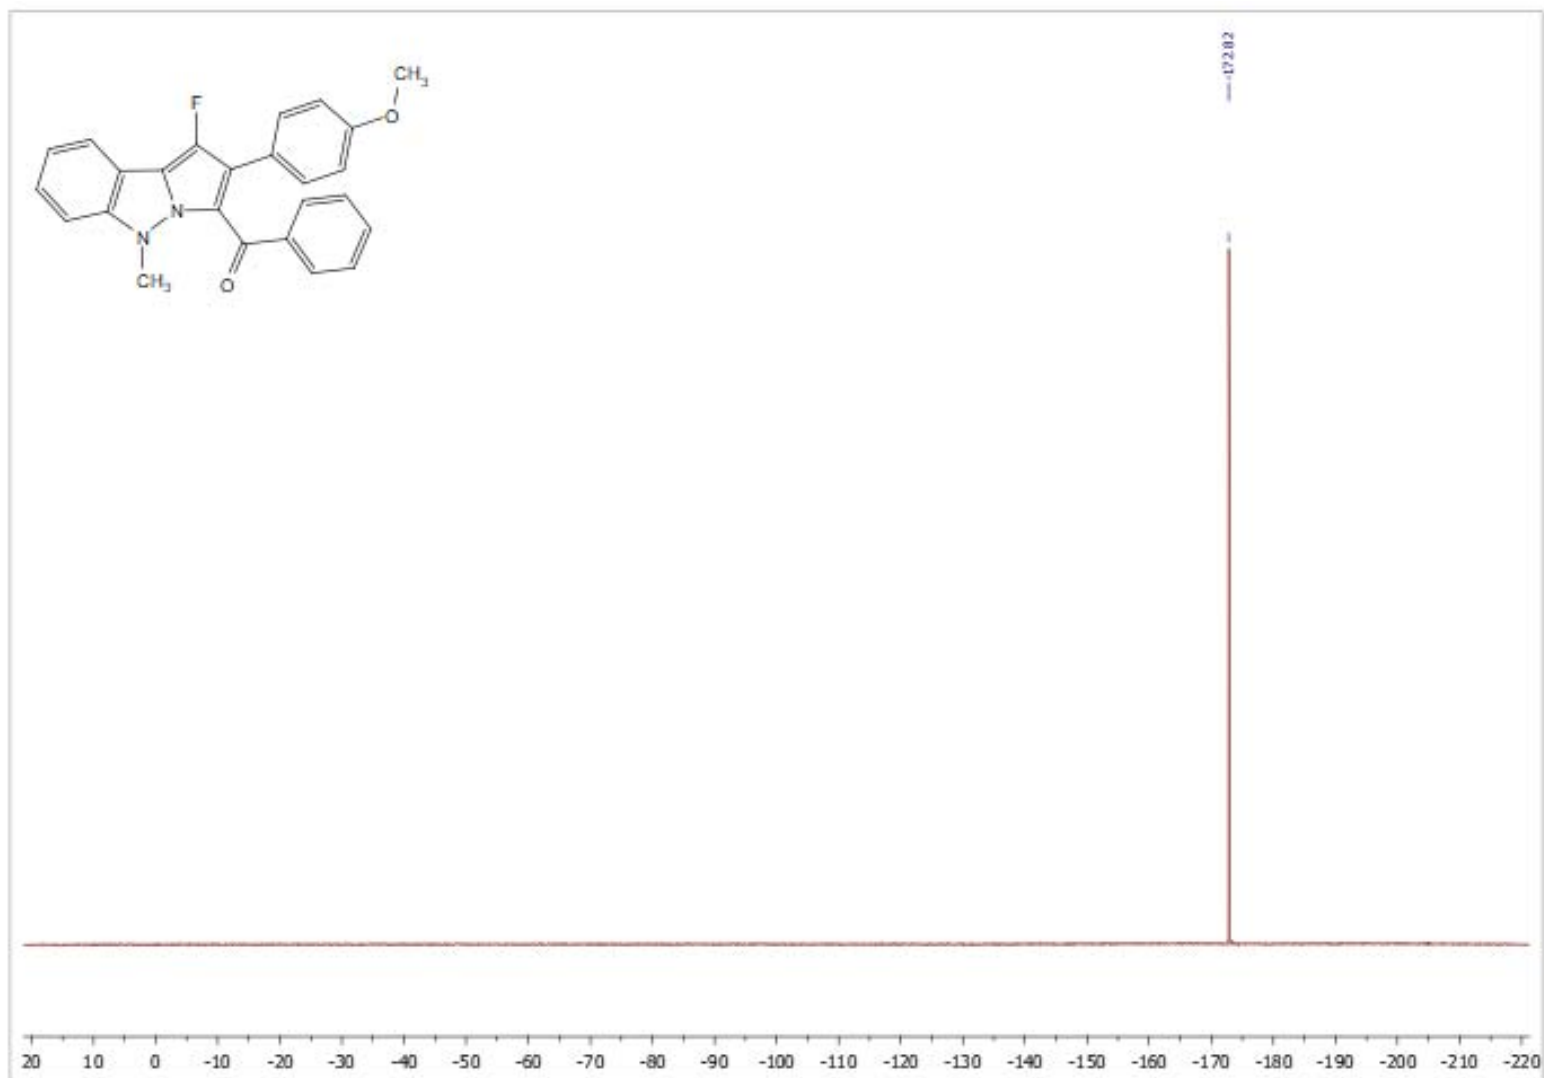

ethyl 2-(4-chlorophenyl)-1-fluoro-5-methyl-5*H*-pyrrolo[1,2-*b*]indazole-3-carboxylate **7d**

<sup>1</sup>H NMR

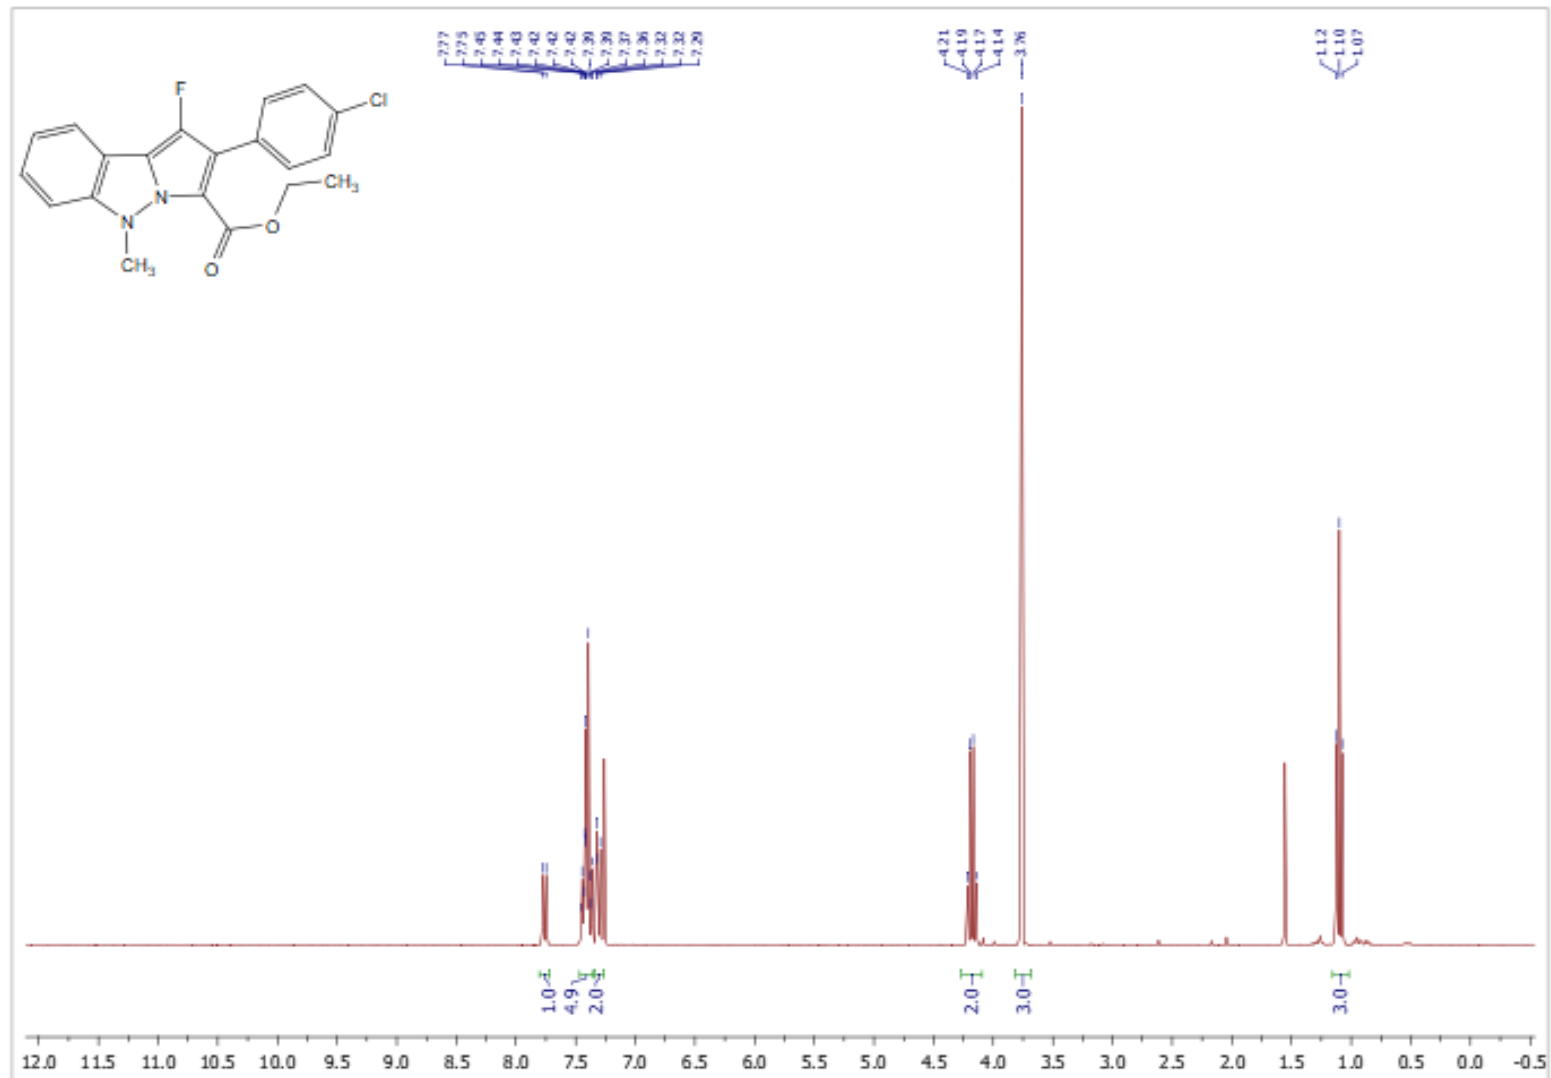

$^{13}\text{C}$  NMR

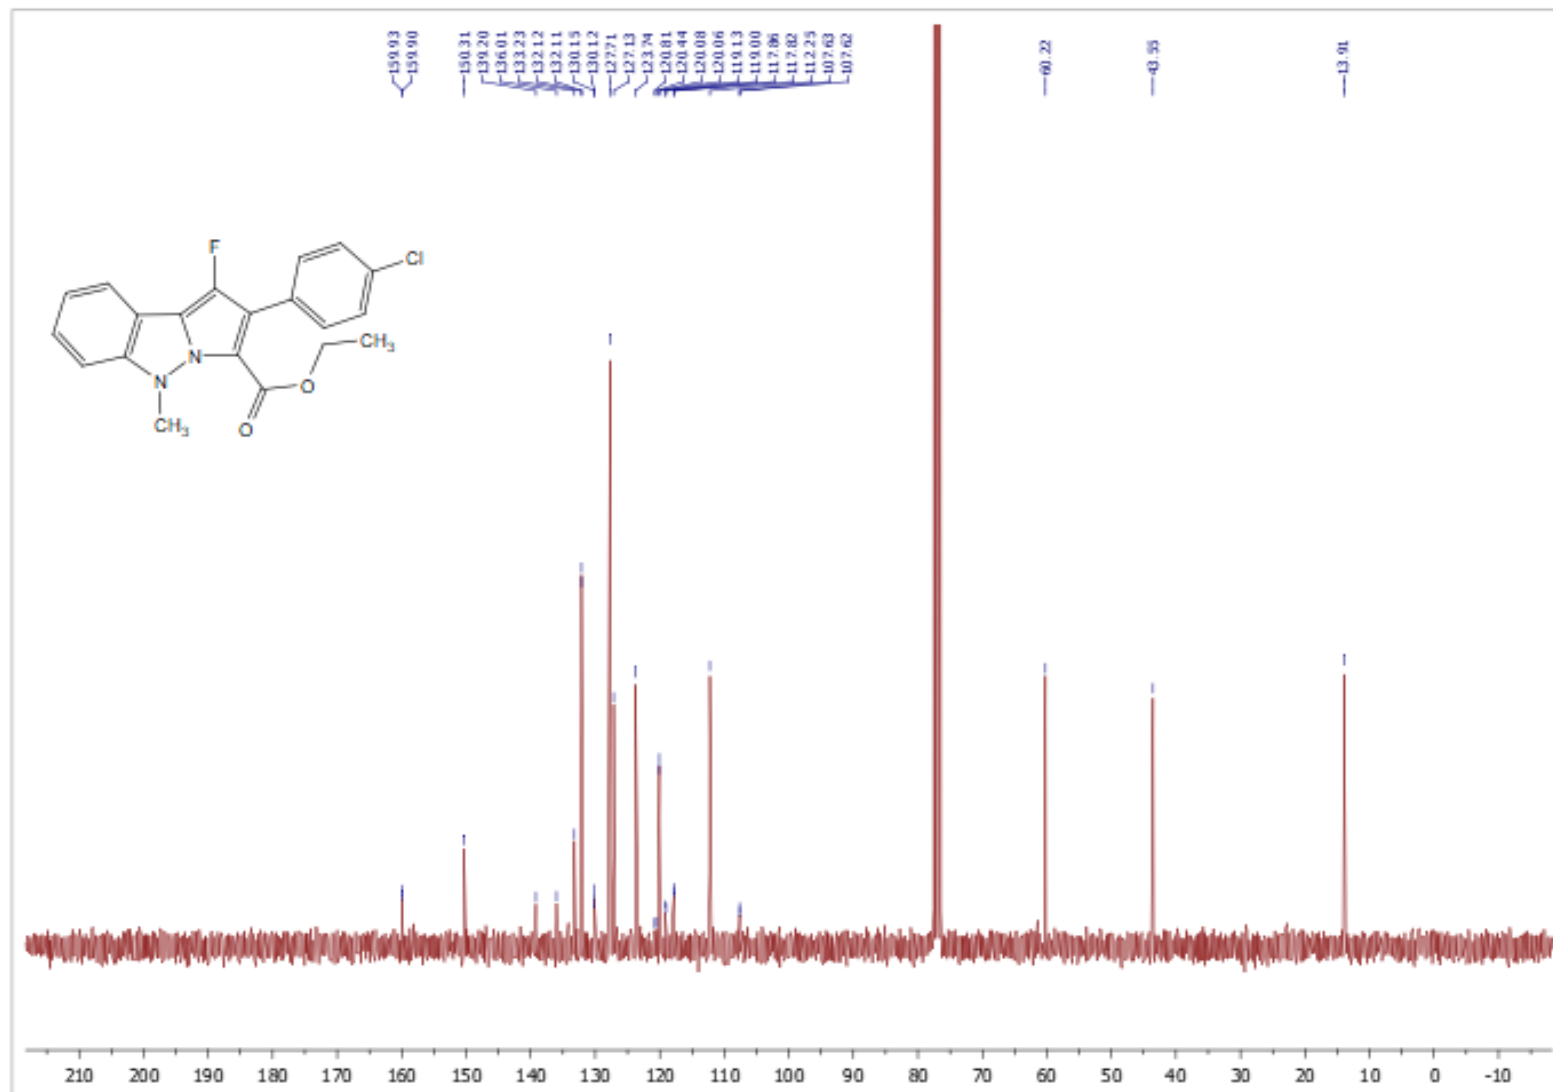

$^{19}\text{F}$  NMR

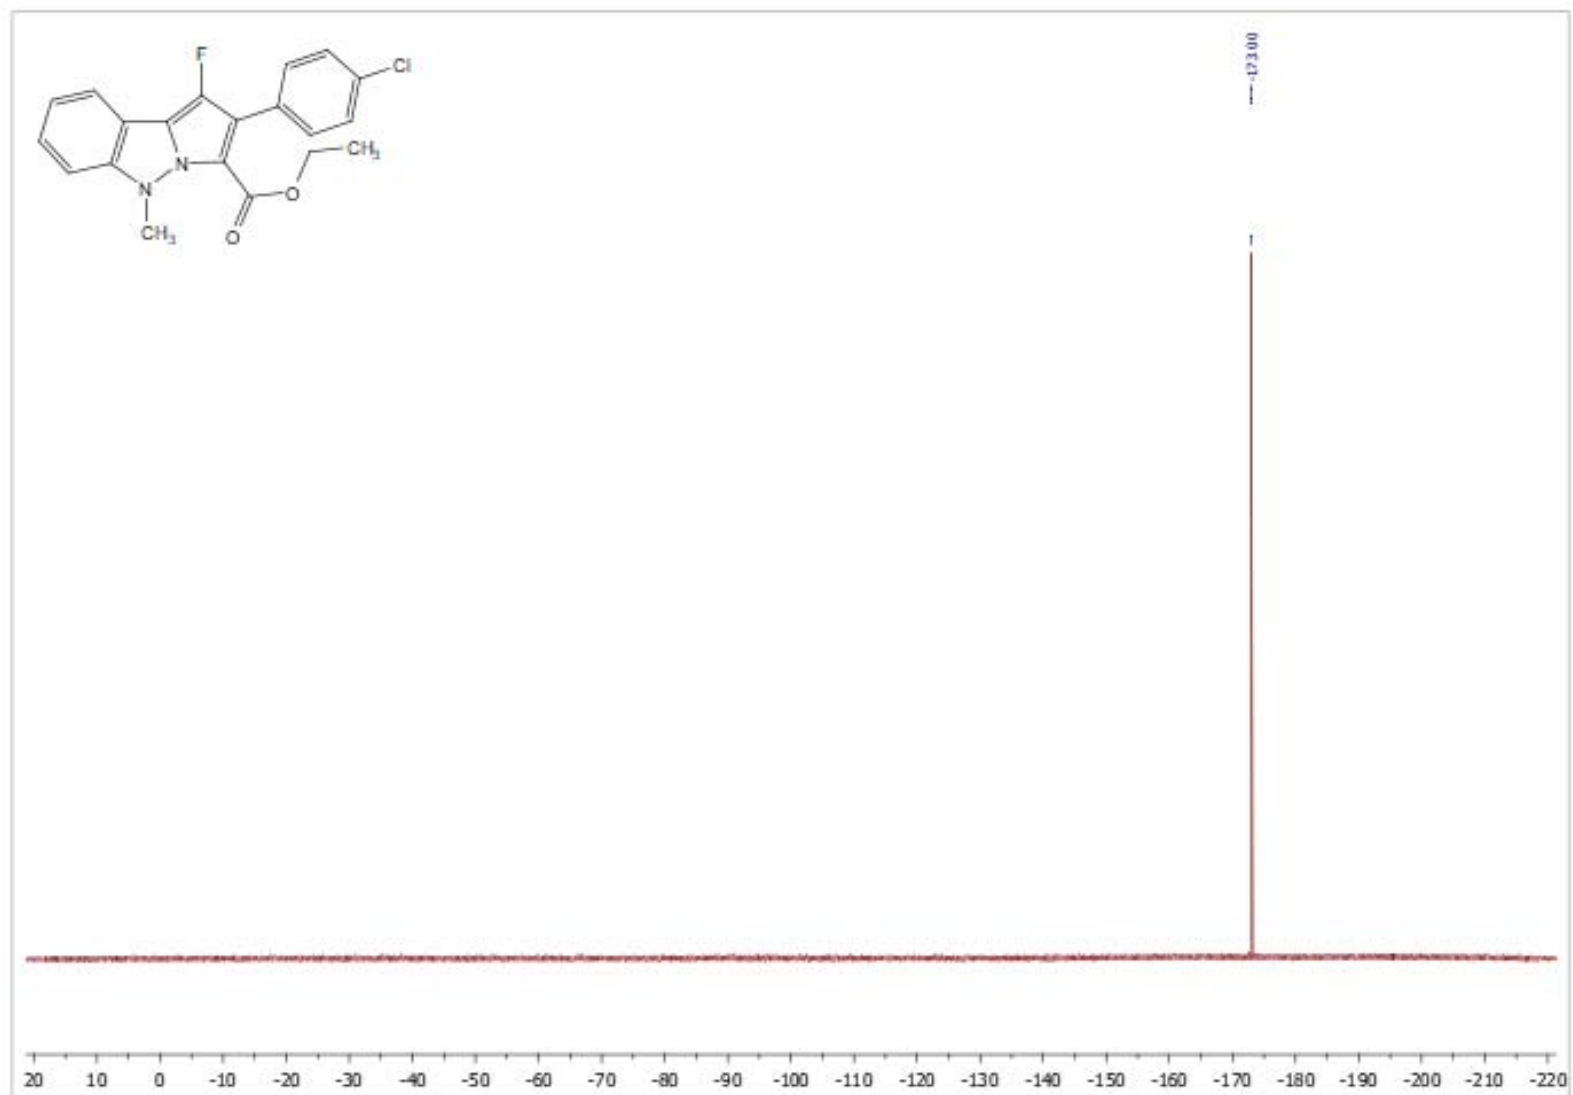

ethyl 3-benzoyl-2-(4-chlorophenyl)-5-methyl-5H-pyrrolo[1,2-b]indazole-1-carboxylate **7e**

$^1\text{H}$  NMR

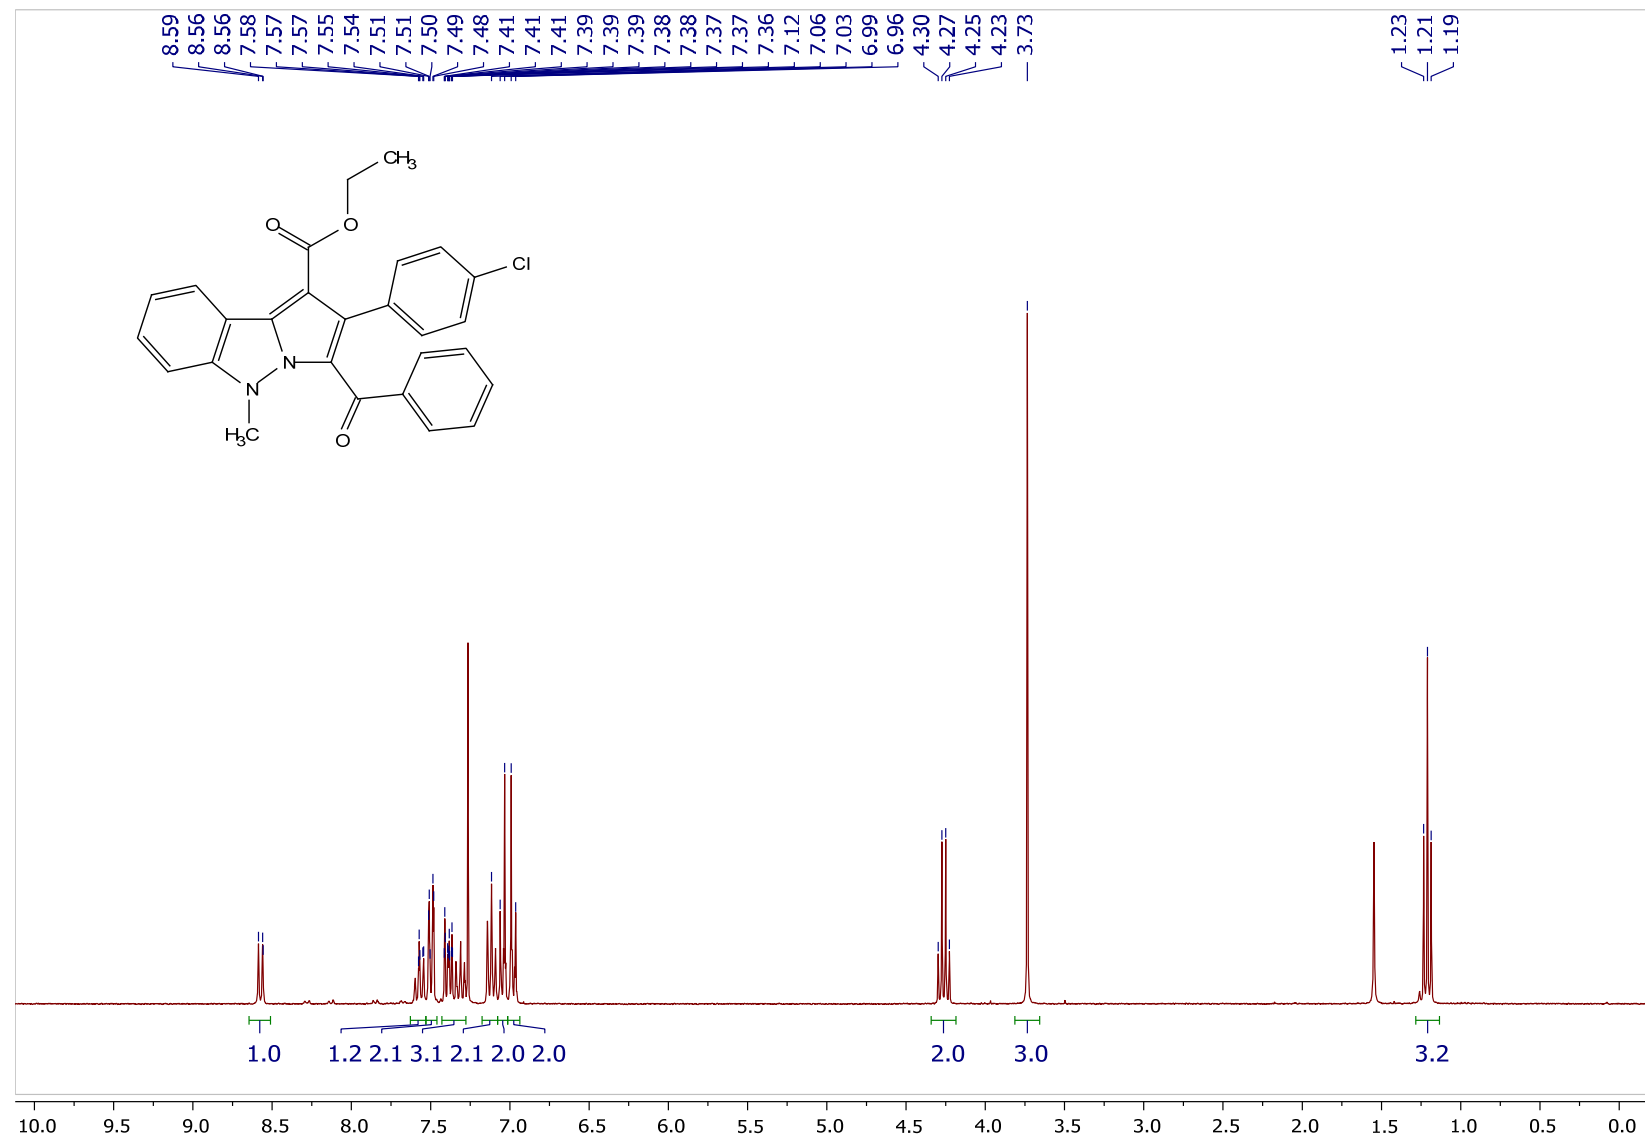

$^{13}\text{C}$  NMR

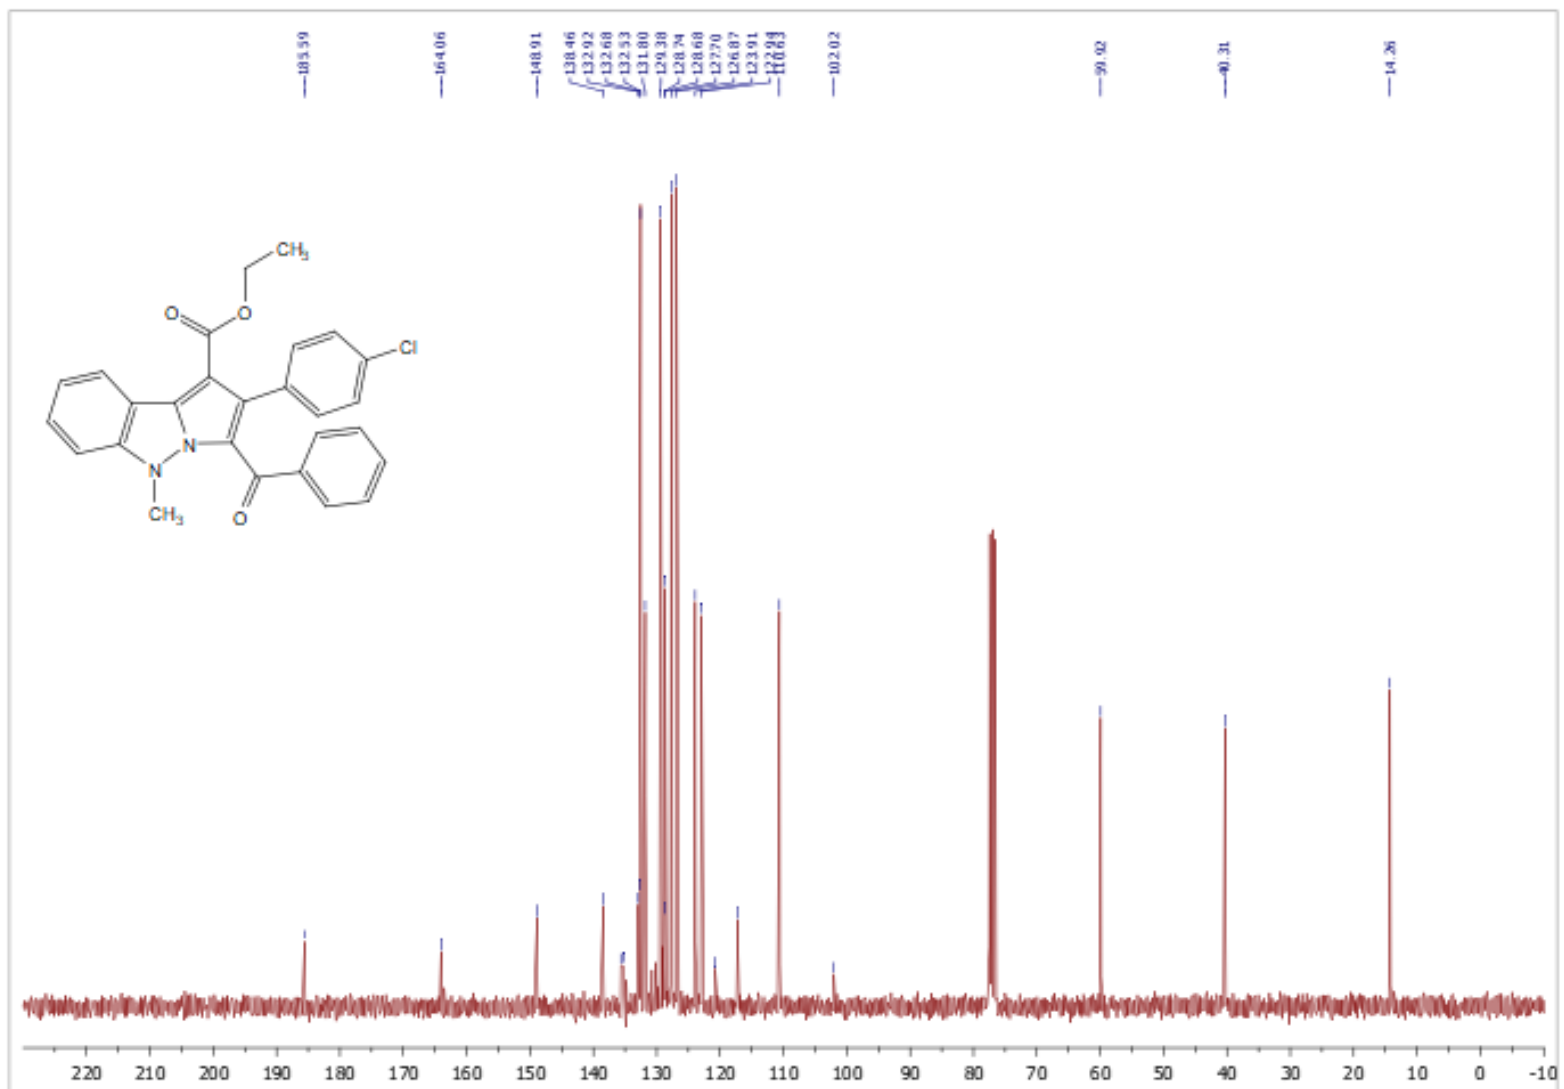

[2-(4-chlorophenyl)-5-methyl-5H-pyrrolo[1,2-b]indazol-3-yl](phenyl)methanone **7f**

<sup>1</sup>H NMR

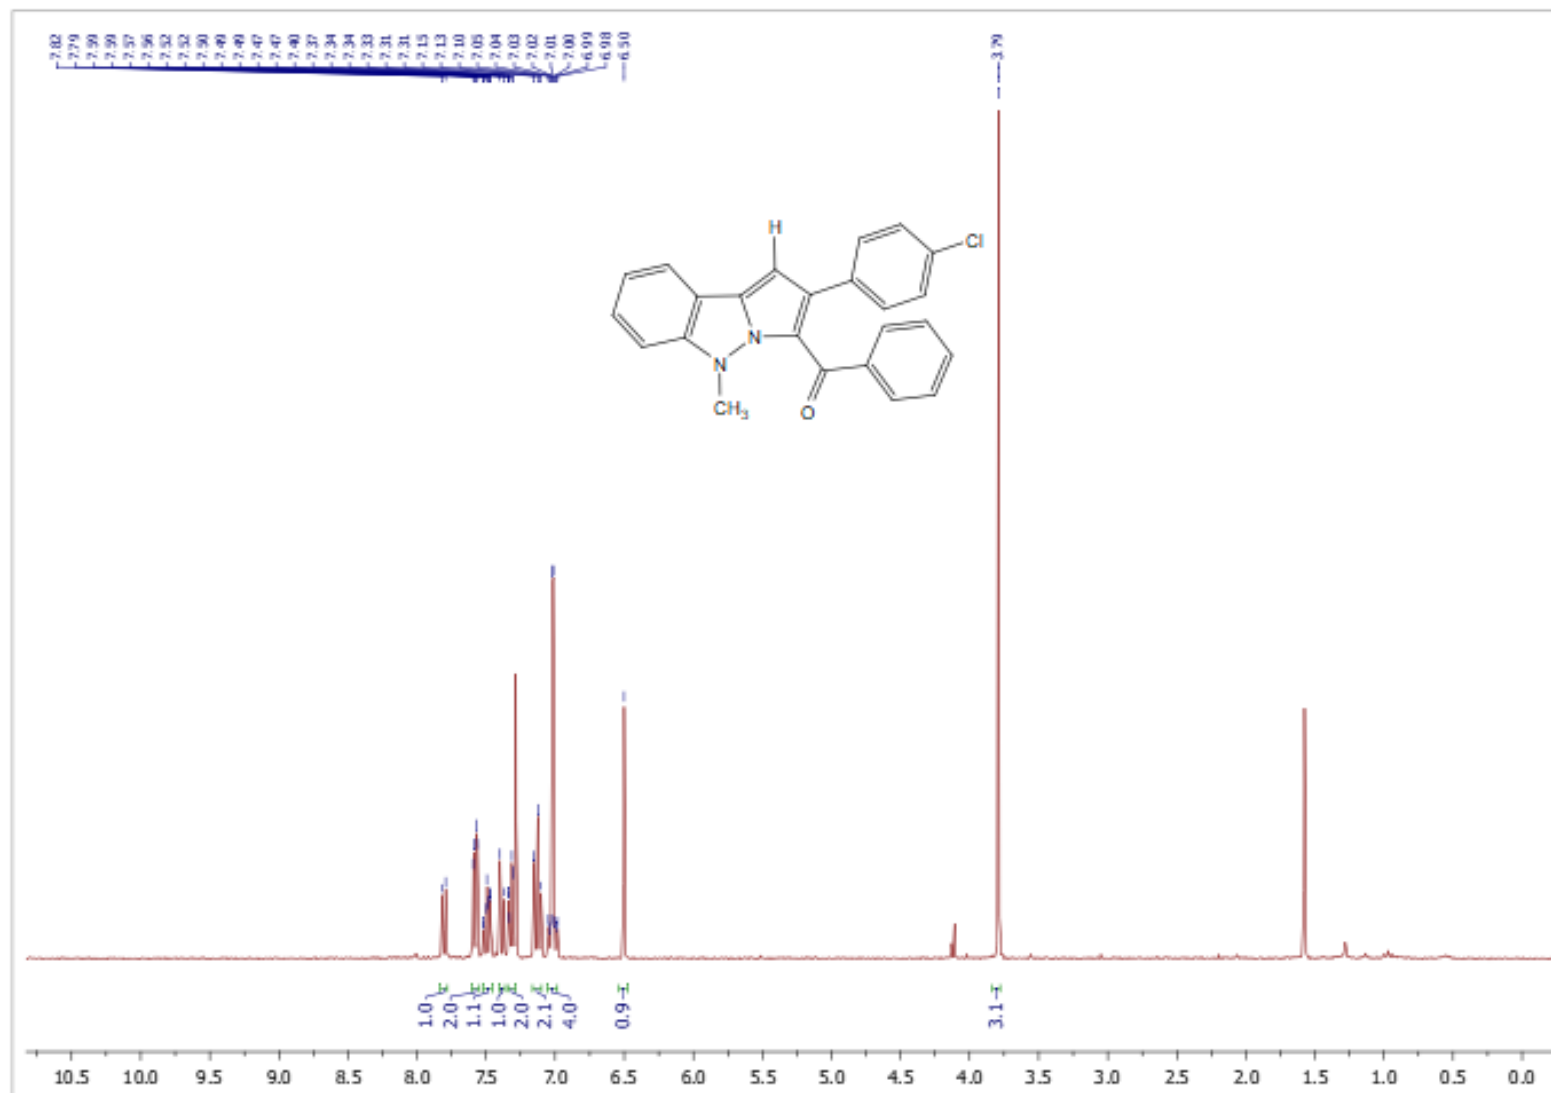



$^{13}\text{C}$  NMR

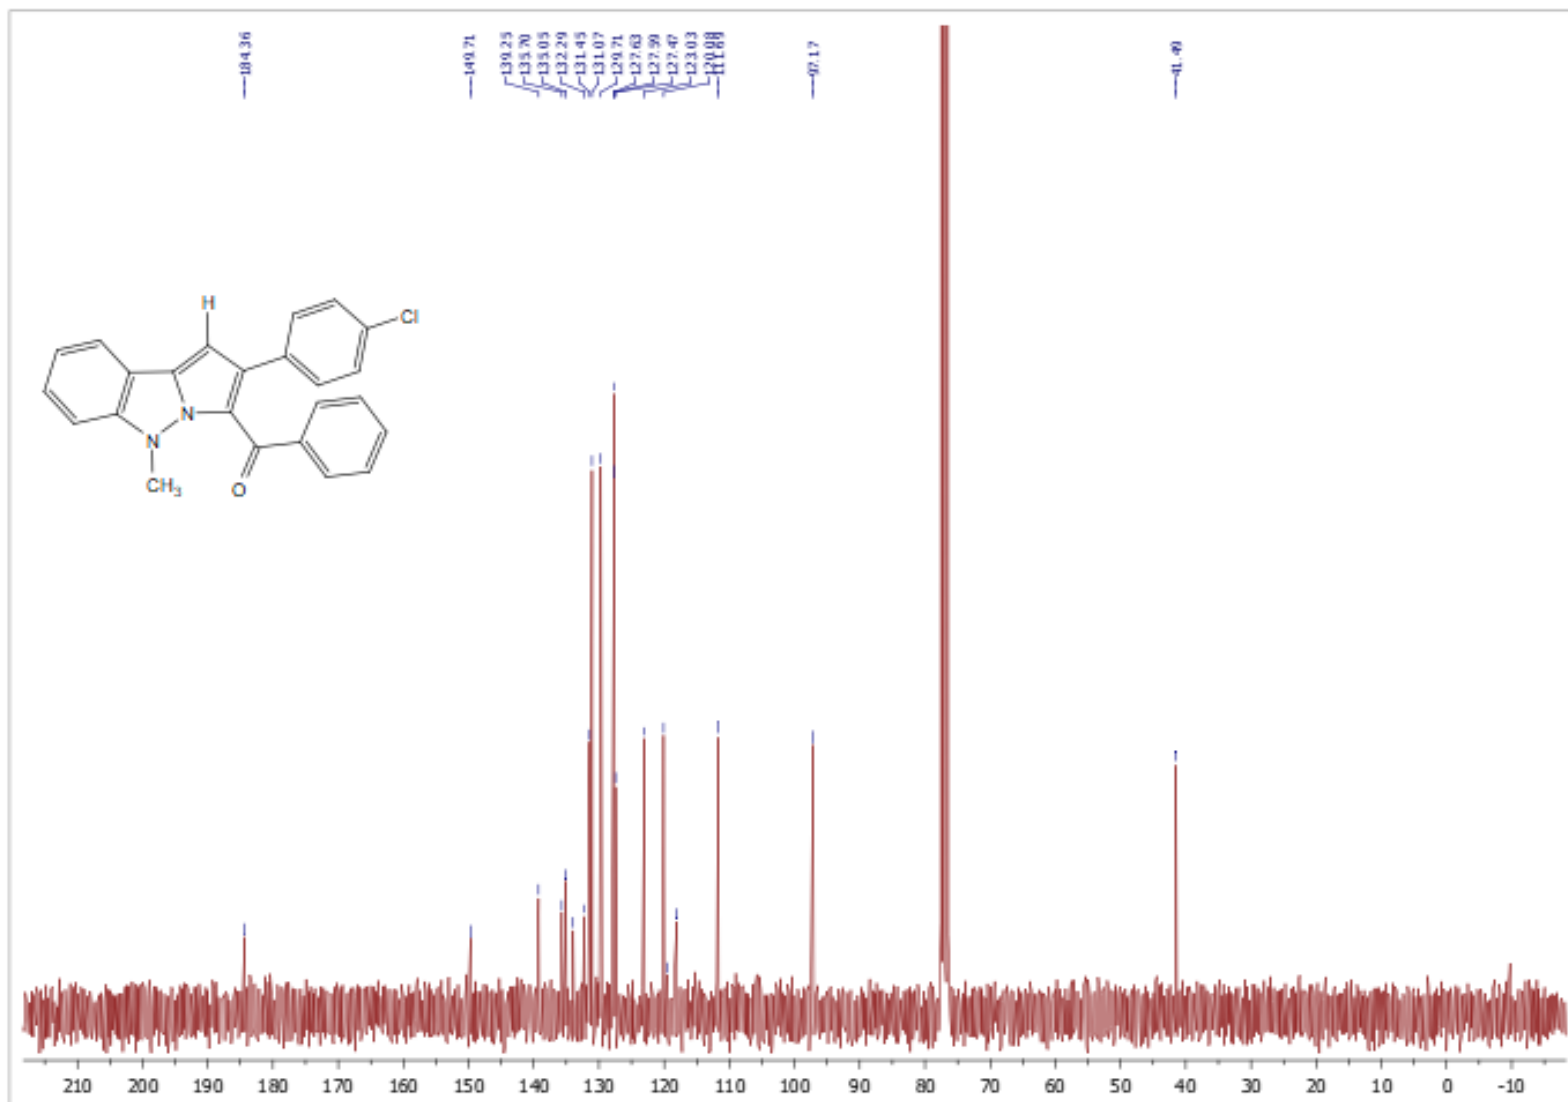

$^1\text{H}$ - $^1\text{H}$  COSY NMR

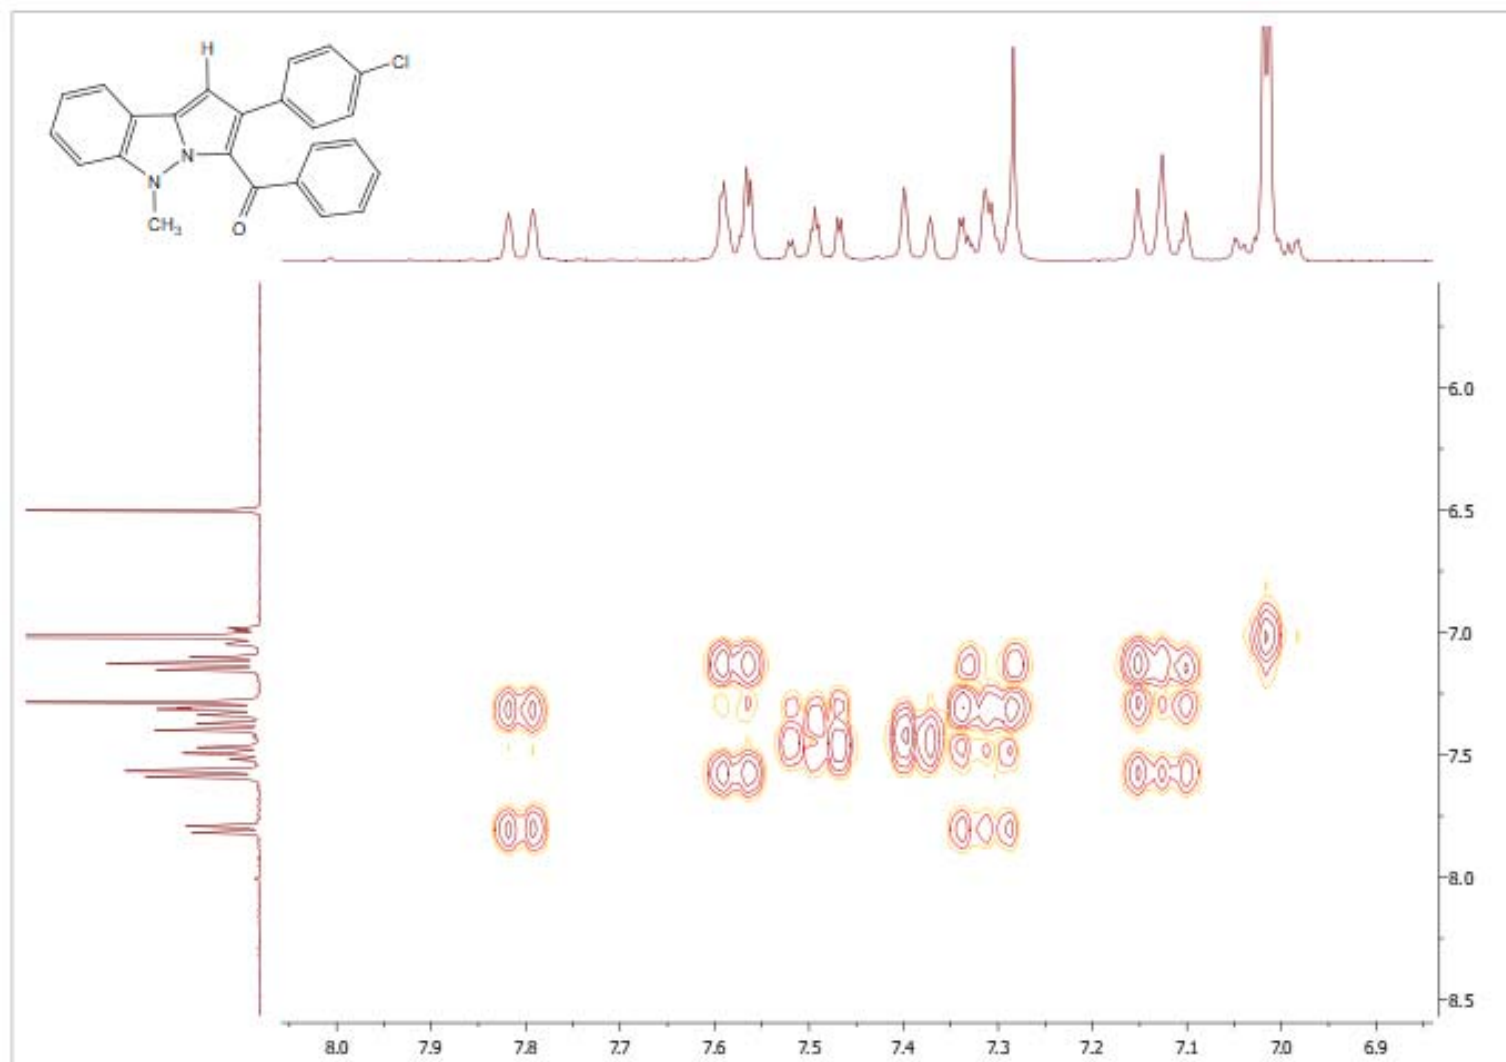

$^1\text{H}$ - $^{13}\text{C}$  HSQC NMR

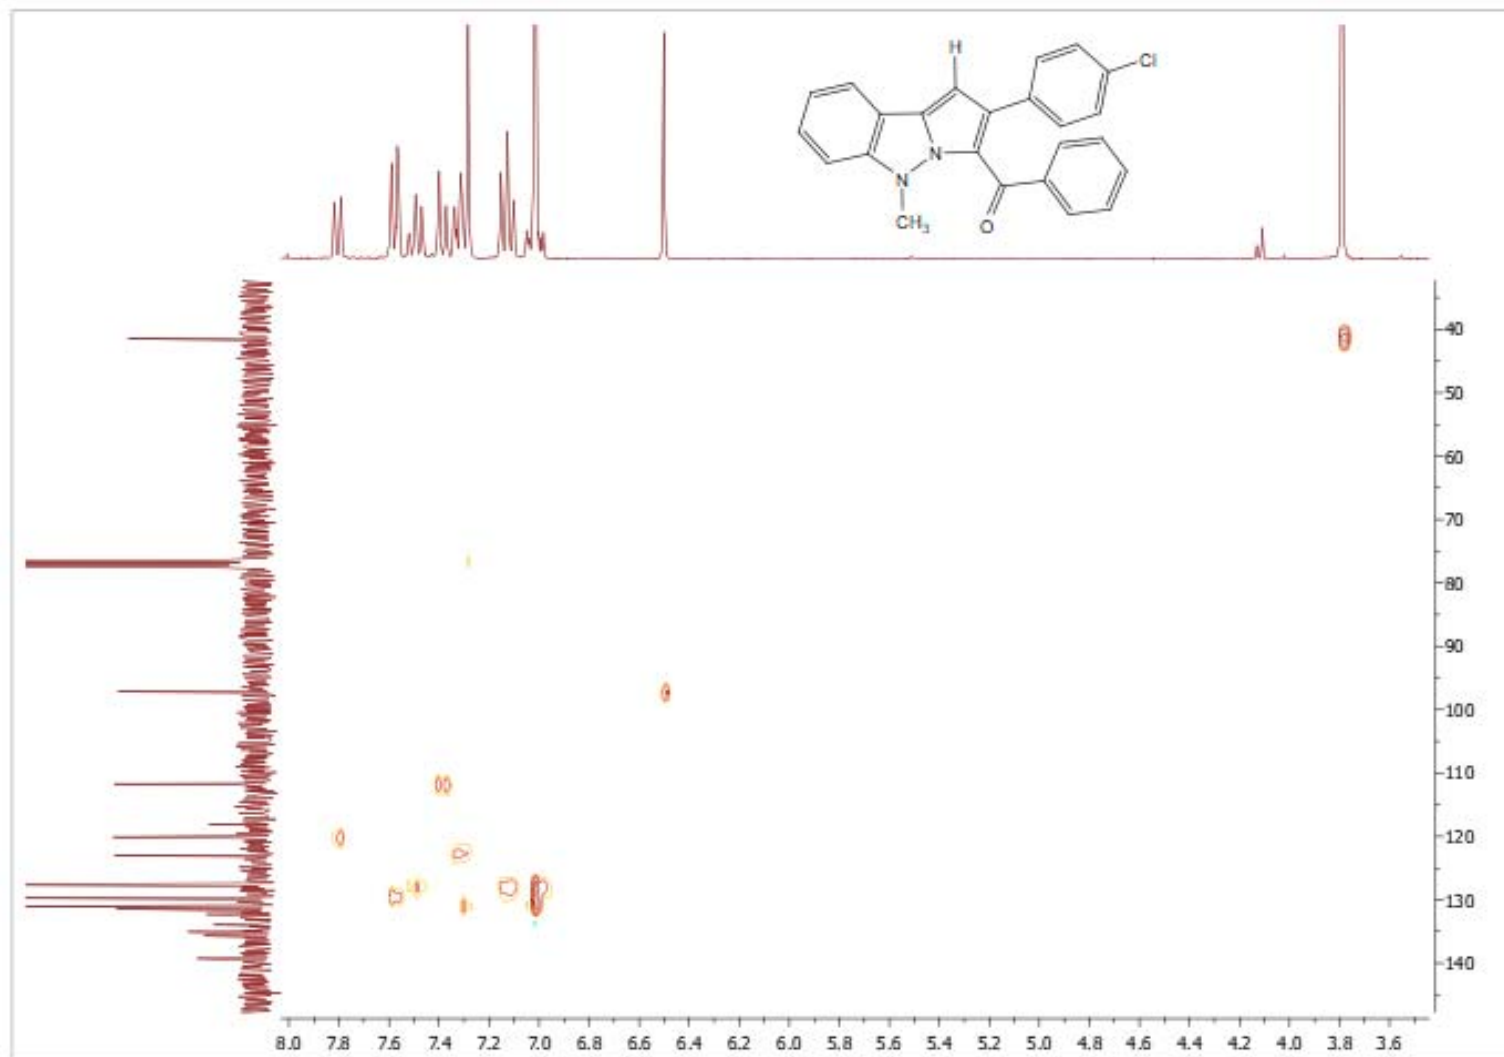

$^1\text{H}$ - $^{13}\text{C}$  HMBC NMR

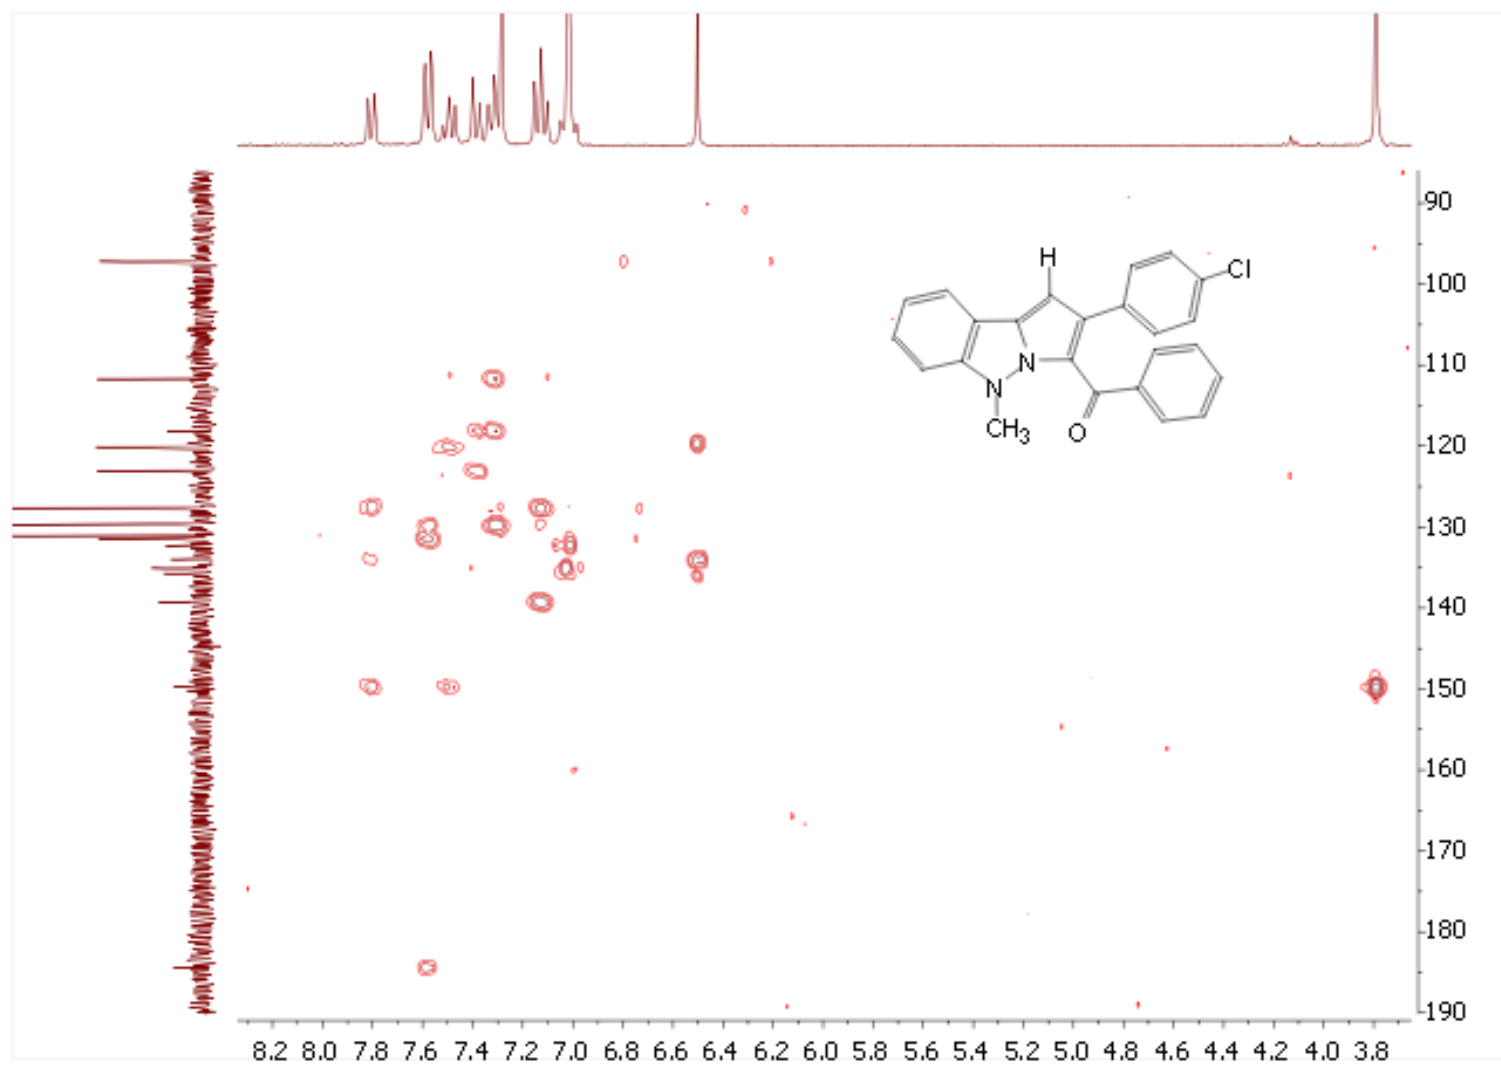

$^{19}\text{F}$  NMR of reaction mixture containing primary cycloadduct **8**

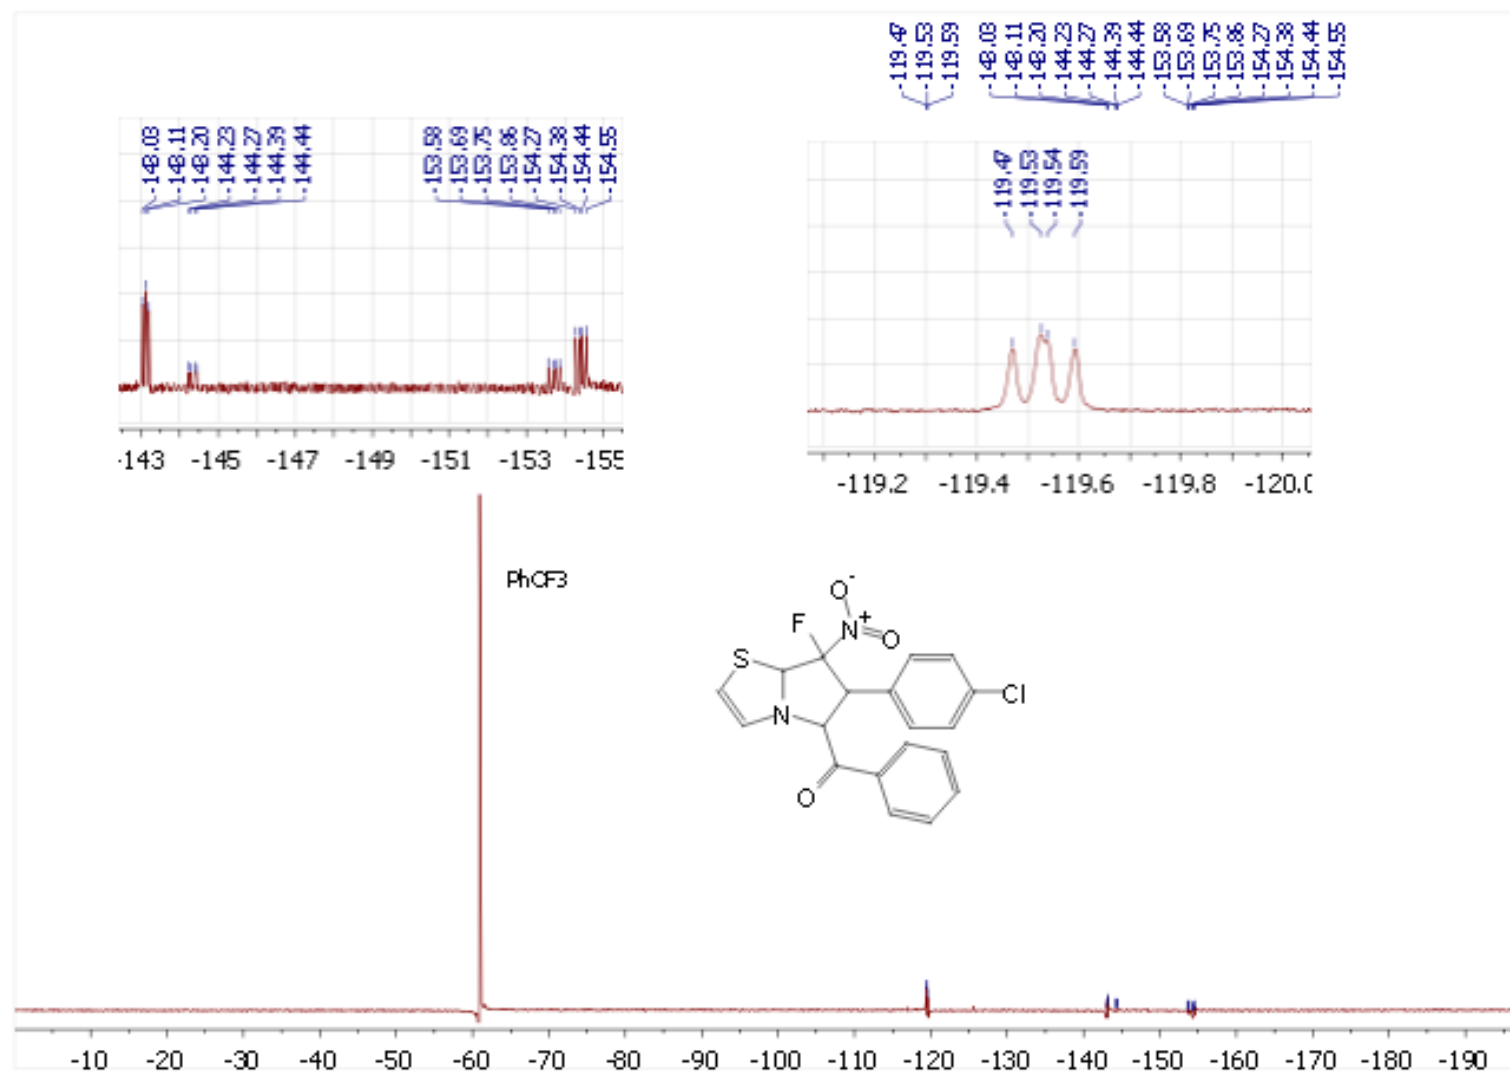

Supplement: d1nj05332a1.pdf [file d1nj05332a1.pdf]
